# Supplementary material for: Stress resets ancestral heritable small RNA responses
Source: eLife journal article supplement (doi:10.7554/elife.65797), 2021-03-16
Supplement: supp [file elife-65797-supp-v1.zip]

Archive with 17 entries (17 files):
- elife_poa_e65797_Figure_1_figure_supplement_1.pdf
- elife_poa_e65797_Figure_1_figure_supplement_2.pdf
- elife_poa_e65797_Figure_1_figure_supplement_3.pdf
- elife_poa_e65797_Figure_1_figure_supplement_4.pdf
- elife_poa_e65797_Figure_1_figure_supplement_5.pdf
- elife_poa_e65797_Figure_5_figure_supplement_1.pdf
- elife_poa_e65797_Figure_5_figure_supplement_2.pdf
- elife_poa_e65797_Figure_5_figure_supplement_3.pdf
- elife_poa_e65797_Figure_6_figure_supplement_1.pdf
- elife_poa_e65797_Supplementary_file_1.csv
- elife_poa_e65797_Transparent_Reporting_File.docx
- elife_poa_e65797_Supplementary_file_2.csv
- elife_poa_e65797_Supplementary_file_3.csv
- elife_poa_e65797_Supplementary_file_4.csv
- elife_poa_e65797_Supplementary_file_5.csv
- elife_poa_e65797_Supplementary_file_6.csv
- elife_poa_e65797_Supplementary_file_7.csv
