# Supplementary material for: Stress resets ancestral heritable small RNA responses
Source: eLife journal article supplement (doi:10.7554/elife.65797), 2021-03-16
Supplement: supp [file elife-65797-supp-v1.zip › elife_poa_e65797_Supplementary_file_1.csv]

	baseMean	log2FoldChange	lfcSE	stat	pvalue	padj
WBGene00185076	4132.209147	-0.662748512	0.08937333	-7.415506552	1.21E-13	8.38E-10
WBGene00198725	31321.45168	-0.62870352	0.095894076	-6.556228976	5.52E-11	1.91E-07
WBGene00077437	16136.55155	-0.557408605	0.091951464	-6.061987259	1.34E-09	3.10E-06
WBGene00219307	2129.410706	-0.867940733	0.145100594	-5.981648382	2.21E-09	3.82E-06
WBGene00219707	11904.17386	-0.579979402	0.098228359	-5.904398761	3.54E-09	4.89E-06
WBGene00006384	852.9308945	-0.522364547	0.089010266	-5.868587618	4.40E-09	5.07E-06
WBGene00010507	12690.73174	-0.686523118	0.12057186	-5.693891742	1.24E-08	1.23E-05
WBGene00197483	805.7980213	-0.850471496	0.156679794	-5.42808665	5.70E-08	4.92E-05
WBGene00016070	3758.581955	-0.483779803	0.090023645	-5.373919316	7.70E-08	5.92E-05
WBGene00012985	1417.781425	-0.430355752	0.080823583	-5.324630932	1.01E-07	6.36E-05
WBGene00200337	1170.072063	-0.590858348	0.110842972	-5.330589171	9.79E-08	6.36E-05
WBGene00194955	1160.938733	-0.383196429	0.072424759	-5.290958954	1.22E-07	7.01E-05
WBGene00199371	7470.850297	-0.626858431	0.122380392	-5.122212961	3.02E-07	0.000160625
WBGene00077558	863.1421633	-0.438344246	0.089399213	-4.903222644	9.43E-07	0.000465661
WBGene00197324	229602.7092	-0.406335226	0.083501315	-4.866213521	1.14E-06	0.000524418
WBGene00007485	4529.480685	-0.316079276	0.065837933	-4.800868732	1.58E-06	0.000682765
WBGene00195233	2108.780181	-0.746836398	0.15653254	-4.771125522	1.83E-06	0.00074519
WBGene00008517	17349.24658	-0.372272471	0.078927786	-4.716621246	2.40E-06	0.000862533
WBGene00021019	8302.507951	-0.749083862	0.158909512	-4.71390196	2.43E-06	0.000862533
WBGene00197401	342.0536187	-0.542848224	0.115289534	-4.708564643	2.49E-06	0.000862533
WBGene00198190	290.5852175	-0.566895612	0.120940924	-4.687376227	2.77E-06	0.000911232
WBGene00077728	1065.094357	-0.404250275	0.086465027	-4.675303842	2.94E-06	0.000922583
WBGene00018491	666.3251882	0.49026541	0.105221014	4.659386856	3.17E-06	0.000953526
WBGene00001119	485.0436232	-0.433872015	0.093316088	-4.649487842	3.33E-06	0.000958766
WBGene00009444	266.6784343	0.482995655	0.104457047	4.623868569	3.77E-06	0.00104181
WBGene00012018	113.8113202	-0.617627356	0.137658931	-4.486649357	7.24E-06	0.001693642
WBGene00018929	1368.711945	-0.434117915	0.096828703	-4.483359827	7.35E-06	0.001693642
WBGene00044728	1158.455105	-0.700127756	0.15591532	-4.490435925	7.11E-06	0.001693642
WBGene00195741	167.240617	-0.608669938	0.13509782	-4.505401618	6.62E-06	0.001693642
WBGene00196042	1931.131871	-0.645714421	0.14334254	-4.50469499	6.65E-06	0.001693642
WBGene00013638	7837.957412	-0.420589644	0.094374649	-4.456595573	8.33E-06	0.001799605
WBGene00200561	1274.798168	-0.545577497	0.122420765	-4.456576458	8.33E-06	0.001799605
WBGene00000685	4723.52366	-0.36291993	0.082717553	-4.387459711	1.15E-05	0.002392736
WBGene00198814	8320.90568	-0.562587461	0.128388843	-4.381903034	1.18E-05	0.002392736
WBGene00015565	277.2585054	0.561030215	0.12910028	4.345693236	1.39E-05	0.002743012
WBGene00006926	337.3153535	-0.673918277	0.156257342	-4.31287431	1.61E-05	0.003019609
WBGene00219571	403.4698217	-0.52006064	0.120599548	-4.312293441	1.62E-05	0.003019609
WBGene00185118	3145.555253	-0.603573195	0.140901289	-4.283659855	1.84E-05	0.003345475
WBGene00044502	6119.359671	-0.349999343	0.082217111	-4.257013376	2.07E-05	0.003673389
WBGene00003235	667.8905096	-0.387893893	0.091561531	-4.23642866	2.27E-05	0.00389519
WBGene00198032	1071.073181	-0.676279501	0.159860486	-4.230435674	2.33E-05	0.00389519
WBGene00199045	916.4597288	-0.595923564	0.140972541	-4.227231492	2.37E-05	0.00389519
WBGene00000465	1523.699469	0.484509619	0.114860882	4.218229995	2.46E-05	0.003959683
WBGene00219675	1573.719373	-0.359888463	0.086248778	-4.172678984	3.01E-05	0.004731101
WBGene00009081	260.6532367	-0.483822231	0.116849455	-4.140560432	3.46E-05	0.005323909
WBGene00001686	1056.471176	0.36274119	0.087861115	4.12857484	3.65E-05	0.005370434
WBGene00012020	641.2648061	0.460027198	0.111322638	4.1323778	3.59E-05	0.005370434
WBGene00021461	372.5709056	-0.53742912	0.131099666	-4.099393521	4.14E-05	0.005967561
WBGene00200120	471.5690777	-0.653524895	0.15983877	-4.088650684	4.34E-05	0.006123157
WBGene00015819	807.2573356	-0.359206902	0.08820456	-4.072430084	4.65E-05	0.006434431
WBGene00000207	611.8034647	-0.435592228	0.107366063	-4.057075536	4.97E-05	0.006737517
WBGene00197666	1267.496654	-0.46721333	0.115396934	-4.048749946	5.15E-05	0.006847436
WBGene00001911	846.1108459	-0.299087158	0.07420212	-4.030709052	5.56E-05	0.00725538
WBGene00010204	241.943302	-0.581522842	0.146378422	-3.972736103	7.11E-05	0.009098572
WBGene00006929	356.5297843	-0.642967669	0.162647983	-3.953124147	7.71E-05	0.009582935
WBGene00021884	6414.944831	-0.376934639	0.095488403	-3.947438941	7.90E-05	0.009582935
WBGene00022729	1540.345256	-0.324218469	0.082069006	-3.950559214	7.80E-05	0.009582935
WBGene00045289	421.3307991	-0.402498879	0.102788468	-3.915798012	9.01E-05	0.01074277
WBGene00000392	276.2963895	0.46421505	0.119178252	3.895132243	9.81E-05	0.010946352
WBGene00004246	719.3609014	0.386729376	0.099149821	3.900454626	9.60E-05	0.010946352
WBGene00007892	340.2505513	-0.402165352	0.103199724	-3.896961495	9.74E-05	0.010946352
WBGene00021018	24391.61568	-0.439370515	0.112721697	-3.897834471	9.71E-05	0.010946352
WBGene00044586	8111.06221	-0.301012832	0.077435586	-3.887267428	0.000101379	0.011127557
WBGene00003989	616.810642	0.352150574	0.090860818	3.875714332	0.000106312	0.011314555
WBGene00022020	3217.056114	-0.338384093	0.087311041	-3.875616269	0.000106355	0.011314555
WBGene00015796	191.0077703	-0.420654563	0.108848454	-3.86458923	0.000111276	0.011658722
WBGene00200659	224.3198433	-0.630189886	0.163315755	-3.858720703	0.000113982	0.011763974
WBGene00021589	97.74664166	-0.627322132	0.163079155	-3.84673401	0.000119703	0.012030803
WBGene00201858	142.0277014	-0.525167946	0.136548061	-3.846030036	0.000120047	0.012030803
WBGene00019598	3893.338669	-0.280460801	0.073363518	-3.822891929	0.000131896	0.01268773
WBGene00197408	202.1340352	-0.611365581	0.159938755	-3.822498055	0.000132107	0.01268773
WBGene00202494	133.953405	-0.584593254	0.152893617	-3.823529494	0.000131555	0.01268773
WBGene00000480	744.2372823	-0.282635323	0.074137083	-3.812333989	0.000137661	0.012826439
WBGene00005022	436.7704744	0.562724226	0.147834017	3.806459686	0.00014097	0.012826439
WBGene00019789	526.9497021	-0.382509753	0.1002515	-3.815501531	0.000135907	0.012826439
WBGene00021148	2925.334037	-0.381648819	0.100262598	-3.806492435	0.000140952	0.012826439
WBGene00022110	836.6878372	-0.314653564	0.082832311	-3.798681462	0.000145468	0.012896289
WBGene00197123	4776.451608	-0.430663578	0.113360968	-3.7990464	0.000145254	0.012896289
WBGene00001976	21985.82753	-0.292327123	0.077621353	-3.766065795	0.00016584	0.014516257
WBGene00006062	359.8467625	-0.379204664	0.101568416	-3.733489968	0.000188845	0.015545967
WBGene00022730	2623.315307	-0.346182102	0.092476862	-3.743445617	0.000181514	0.015545967
WBGene00044167	8136.390828	-0.497644407	0.133130935	-3.73800731	0.000185485	0.015545967
WBGene00044413	210.0117765	-0.420569465	0.112630498	-3.734063783	0.000188415	0.015545967
WBGene00219918	4773.041555	-0.279664745	0.074820061	-3.737831048	0.000185615	0.015545967
WBGene00019538	636.3256118	-0.453451099	0.12174636	-3.724555712	0.00019566	0.015917476
WBGene00008007	5797.195584	-0.29401345	0.079374114	-3.704147785	0.000212103	0.017054528
WBGene00019267	320.2503996	-0.348361939	0.094472879	-3.687428	0.000226532	0.018005401
WBGene00007709	1044.406783	0.369447443	0.100652564	3.670521933	0.000242056	0.019020627
WBGene00020902	10400.9081	-0.284034159	0.077750357	-3.653155698	0.000259037	0.020126306
WBGene00011451	255.8068212	0.385771991	0.105799708	3.646248179	0.000266097	0.020445119
WBGene00000368	245.0945905	-0.481135945	0.132261232	-3.637770037	0.000275009	0.020449358
WBGene00010484	260.0668958	-0.378394705	0.103867487	-3.643052469	0.000269424	0.020449358
WBGene00018075	1565.999019	-0.300184913	0.082519257	-3.637755882	0.000275024	0.020449358
WBGene00045382	1764.539824	-0.342181336	0.094255862	-3.630345429	0.000283042	0.020821666
WBGene00009310	48261.13741	-0.267600273	0.074092123	-3.611723639	0.000304169	0.021683773
WBGene00044213	1759.542678	-0.318426935	0.088098856	-3.614427571	0.000301012	0.021683773
WBGene00195811	14307.53445	-0.386492863	0.106938155	-3.614171796	0.000301309	0.021683773
WBGene00018202	8461.675096	-0.287057265	0.079625594	-3.605087907	0.000312047	0.021868426
WBGene00018310	9956.148895	-0.379767964	0.105367393	-3.604226648	0.000313084	0.021868426
WBGene00197453	3199.43183	-0.59940232	0.167038353	-3.588411344	0.000332699	0.023006142
WBGene00017796	1865.263268	-0.264885257	0.074120171	-3.573726992	0.000351936	0.024095412
WBGene00003884	7980.051397	-0.355904567	0.09974937	-3.567988104	0.000359733	0.02438777
WBGene00219771	907.2976085	-0.538094592	0.150956596	-3.564564963	0.00036446	0.02446837
WBGene00019198	3478.497262	-0.321588574	0.090431261	-3.556165962	0.000376306	0.025020758
WBGene00012953	108.0465156	-0.460994552	0.129739251	-3.553238896	0.000380519	0.025059877
WBGene00045272	19132.64487	-0.335807625	0.094754679	-3.54396878	0.000394152	0.025712835
WBGene00010057	106.2565144	-0.516251896	0.146643703	-3.520450491	0.000430814	0.027584089
WBGene00206493	915.5615742	-0.305146174	0.086617813	-3.522903227	0.000426847	0.027584089
WBGene00006927	99.92548806	-0.579702691	0.165184566	-3.509424073	0.000449078	0.028489689
WBGene00219413	978.4370713	-0.362144541	0.103452384	-3.500591552	0.000464227	0.029182982
WBGene00008446	248.7163934	-0.417197886	0.119548832	-3.489769662	0.000483437	0.030116821
WBGene00012374	10201.80517	-0.29638973	0.085029715	-3.485719414	0.000490816	0.030303476
WBGene00020115	375.0428676	0.373838021	0.10734648	3.48253638	0.000496688	0.030394652
WBGene00010734	7500.118249	-0.268341258	0.077221108	-3.474972901	0.000510905	0.030990419
WBGene00022251	356.0264188	0.352256662	0.101603392	3.466977385	0.000526346	0.031376584
WBGene00197277	701.9482175	-0.384026247	0.110716582	-3.468552242	0.000523271	0.031376584
WBGene00018807	788.871091	-0.314734329	0.091206829	-3.450775909	0.000558977	0.033037003
WBGene00003776	151.4270536	0.523698685	0.152018429	3.444968406	0.000571126	0.03346896
WBGene00004374	3333.244956	0.360570462	0.104936701	3.436075815	0.000590206	0.034296412
WBGene00018664	6537.616904	-0.244156296	0.071314823	-3.423640209	0.000617884	0.035605547
WBGene00000408	337.3427651	0.374344402	0.109722586	3.411735146	0.000645508	0.036803088
WBGene00021973	222.4049106	0.337324465	0.098938934	3.409420864	0.00065101	0.036803088
WBGene00198462	277.7318994	-0.455072718	0.13353437	-3.407907034	0.000654632	0.036803088
WBGene00194981	1663.287733	-0.491459636	0.144690406	-3.396629049	0.000682214	0.037740068
WBGene00195813	6368.198338	-0.462216737	0.136074445	-3.396793105	0.000681805	0.037740068
WBGene00017080	1568.822759	-0.294106091	0.086675614	-3.393181529	0.000690858	0.037914967
WBGene00198179	726.0859409	-0.397564896	0.117287793	-3.389652795	0.000699812	0.038103935
WBGene00015488	377.6070224	-0.364803276	0.107970403	-3.378734053	0.000728204	0.03903513
WBGene00015658	231.646842	0.40399275	0.119509974	3.380410309	0.000723777	0.03903513
WBGene00006537	1143.969775	0.415048475	0.123119983	3.371089431	0.000748715	0.039762478
WBGene00011812	3155.425547	-0.360210727	0.106905945	-3.369417175	0.000753273	0.039762478
WBGene00201427	258.2855795	-0.49863193	0.148414426	-3.359726841	0.000780196	0.040871617
WBGene00010011	361.0731238	-0.371553365	0.111005506	-3.347161566	0.000816436	0.042448539
WBGene00175029	548.8022222	-0.35397683	0.106010448	-3.339074938	0.000840579	0.043377632
WBGene00004027	586.5380318	0.400093268	0.120009076	3.333858409	0.000856502	0.043855294
WBGene00044439	920.5590928	-0.51667293	0.155068059	-3.331910739	0.000862519	0.043855294
WBGene00021549	460.968566	0.377968656	0.113609043	3.326924037	0.000878103	0.044321772
WBGene00001161	484.8379749	0.327011182	0.098639944	3.315200409	0.000915774	0.044331696
WBGene00003948	663.2191284	0.32865117	0.099150804	3.314659673	0.000917548	0.044331696
WBGene00008140	509.259255	0.351400534	0.106152577	3.31033446	0.000931846	0.044331696
WBGene00016381	296.6266238	0.421866148	0.126993695	3.321945608	0.000893921	0.044331696
WBGene00019574	226.6170649	-0.360386628	0.108752616	-3.313820298	0.000920306	0.044331696
WBGene00022486	319.6301679	-0.392165317	0.11843849	-3.311130675	0.000929198	0.044331696
WBGene00045410	10954.72317	-0.340734644	0.102969296	-3.309089768	0.000935998	0.044331696
WBGene00170296	2437.08533	-0.303469298	0.091385581	-3.320756889	0.000897737	0.044331696
WBGene00195343	102.6826012	-0.557001505	0.168005897	-3.31536878	0.000915223	0.044331696
WBGene00020451	1402.73528	-0.27828944	0.084275315	-3.302146529	0.000959479	0.045134691
WBGene00002063	2784.538761	-0.314479623	0.095826438	-3.281762629	0.001031604	0.047242001
WBGene00004076	1446.798292	-0.244178098	0.074316453	-3.285653303	0.001017462	0.047242001
WBGene00007924	972.1838208	-0.299210268	0.091142996	-3.282866271	0.001027574	0.047242001
WBGene00011511	718.8338282	-0.275735826	0.083980545	-3.283329815	0.001025886	0.047242001
WBGene00235256	154.2806606	-0.398354256	0.121580099	-3.276475836	0.001051113	0.047818729
WBGene00014562	1712.169735	-0.359090658	0.110017238	-3.263949046	0.001098709	0.049334898
WBGene00201830	331.3060902	-0.525834885	0.161049593	-3.265049448	0.00109445	0.049334898
WBGene00003926	657.0909372	0.317528218	0.097586902	3.253799542	0.001138726	0.050476221
WBGene00004241	1450.856006	0.284191126	0.087319364	3.254617442	0.001135452	0.050476221
WBGene00012319	467.359538	0.328183975	0.101056691	3.247523462	0.001164141	0.051274093
WBGene00197130	403.5357998	-0.437115751	0.134902896	-3.240225102	0.001194354	0.052271874
WBGene00003917	7135.144722	-0.219286235	0.06792475	-3.228370128	0.001244978	0.054144787
WBGene00000837	870.4943834	0.379739741	0.117786295	3.223972202	0.001264257	0.054300219
WBGene00194681	1015.552906	-0.467921172	0.145104707	-3.224713949	0.001260986	0.054300219
WBGene00018186	650.6132575	-0.385208306	0.12011733	-3.206933643	0.001341579	0.057265564
WBGene00199675	454.2051379	-0.466435684	0.14625496	-3.18919567	0.001426693	0.060525032
WBGene00050947	1662.340362	-0.302162518	0.094827555	-3.186442153	0.001440343	0.06073153
WBGene00007010	423.4439198	0.328218125	0.103173503	3.181224983	0.001466537	0.061461228
WBGene00002990	3441.623238	-0.317045612	0.100035792	-3.169321762	0.001527951	0.063649301
WBGene00019433	366.5865038	0.304595985	0.096675308	3.150711294	0.001628734	0.067039855
WBGene00020770	221.9393342	0.492249051	0.156172063	3.151966124	0.001621751	0.067039855
WBGene00010908	511.9876688	0.289733667	0.092229521	3.141441742	0.001681183	0.067664678
WBGene00011720	1135.250944	0.310855591	0.098822519	3.145594701	0.001657495	0.067664678
WBGene00012423	251.2395138	0.339316717	0.108082695	3.139417612	0.00169284	0.067664678
WBGene00021658	689.6408208	-0.298197608	0.094927861	-3.141307575	0.001681953	0.067664678
WBGene00199724	367.1988845	-0.502513234	0.159992048	-3.140863813	0.001684503	0.067664678
WBGene00004126	172.3551869	0.476177263	0.151850824	3.135822707	0.001713728	0.068105903
WBGene00001178	247.5518752	-0.417593173	0.133250348	-3.133899316	0.001725	0.068162156
WBGene00000514	1344.81779	-0.284984422	0.09149153	-3.114872166	0.001840246	0.070456815
WBGene00000770	957.6813979	-0.254625481	0.081804434	-3.112612242	0.001854395	0.070456815
WBGene00000867	712.2973811	0.398967367	0.128040064	3.115957254	0.001833488	0.070456815
WBGene00001459	3400.247606	-0.297380754	0.095354452	-3.118687687	0.001816584	0.070456815
WBGene00008733	907.1012923	0.251406086	0.080724041	3.114389268	0.001843261	0.070456815
WBGene00044541	10750.07676	-0.247930339	0.079551746	-3.11659207	0.001829545	0.070456815
WBGene00045168	130.889024	-0.408742021	0.131300505	-3.113027024	0.001851791	0.070456815
WBGene00001258	712.1555039	0.316830745	0.102018666	3.105615449	0.001898835	0.07053121
WBGene00003130	588.2167687	0.34506109	0.111084909	3.106282326	0.001894557	0.07053121
WBGene00019094	401.1328542	-0.394364653	0.127103145	-3.10271357	0.001917551	0.07053121
WBGene00021522	438.1072868	0.313301652	0.100776359	3.108880437	0.001877977	0.07053121
WBGene00021606	44546.45177	-0.265739877	0.085463351	-3.109401559	0.001874667	0.07053121
WBGene00021710	222.6164891	-0.380843731	0.122684985	-3.104240756	0.00190768	0.07053121
WBGene00020038	373.4465543	-0.309569333	0.099958956	-3.096964455	0.001955133	0.071533047
WBGene00001607	512.1099527	0.386602125	0.125028409	3.092114258	0.001987363	0.071950879
WBGene00014117	164.2677201	0.431326762	0.139433163	3.093430233	0.001978571	0.071950879
WBGene00200252	664.4979592	-0.486087088	0.157551922	-3.085250132	0.00203381	0.07324895
WBGene00044436	2545.90399	-0.258828294	0.084018825	-3.080598846	0.002065848	0.073320179
WBGene00044799	7044.987954	-0.253258966	0.082217681	-3.080346754	0.002067597	0.073320179
WBGene00220084	8782.235599	-0.260090504	0.084413198	-3.081159222	0.002061964	0.073320179
WBGene00008405	455.6321635	0.304072428	0.099045413	3.070030382	0.00214037	0.074810904
WBGene00009572	9404.087848	-0.293416878	0.095498083	-3.072489721	0.002122811	0.074810904
WBGene00013270	2171.296255	0.324405657	0.105676813	3.069790329	0.002142091	0.074810904
WBGene00008131	421.1255835	0.29221207	0.09530584	3.066045797	0.002169101	0.074996663
WBGene00018658	1360.101172	-0.233907241	0.076265418	-3.067015781	0.002162074	0.074996663
WBGene00013189	6123.701577	-0.307973109	0.100698947	-3.058354826	0.002225559	0.076565867
WBGene00004386	314.3693686	0.363999331	0.119344316	3.049993021	0.002288467	0.077954425
WBGene00015247	1220.901744	-0.272857823	0.089442715	-3.05064335	0.002283516	0.077954425
WBGene00004702	435.83411	0.320902253	0.105617543	3.038342345	0.002378835	0.07908484
WBGene00016524	678.1424466	0.294707616	0.096966687	3.039266627	0.002371549	0.07908484
WBGene00022037	785.8435083	0.389352549	0.128096525	3.039524687	0.002369518	0.07908484
WBGene00022099	756.478217	0.334510295	0.109961177	3.042076351	0.002349523	0.07908484
WBGene00198401	178.7308346	-0.495263407	0.162859084	-3.041054842	0.002357509	0.07908484
WBGene00004163	381.4236588	0.327171841	0.108260994	3.022065752	0.00251056	0.080746619
WBGene00004361	397.8020858	-0.264149271	0.087245467	-3.027656103	0.002464584	0.080746619
WBGene00009701	388.9597402	0.347380594	0.114855996	3.024488093	0.002490543	0.080746619
WBGene00012228	47672.57295	-0.264590783	0.087438137	-3.026034082	0.002477844	0.080746619
WBGene00014977	12542.00628	-0.275044583	0.090950009	-3.024129268	0.002493499	0.080746619
WBGene00018599	556.3128549	0.339410866	0.112262338	3.023372508	0.002499743	0.080746619
WBGene00044478	4207.767921	-0.322252831	0.106381559	-3.029217047	0.002451885	0.080746619
WBGene00000177	456.7145273	-0.337597655	0.11178731	-3.019999799	0.002527749	0.080923061
WBGene00006796	185.3900771	0.433174269	0.144188166	3.004228991	0.002662548	0.084845726
WBGene00007303	30347.29051	-0.270930116	0.090232776	-3.002568787	0.002677115	0.084918568
WBGene00012326	307.0361782	0.34595233	0.11537304	2.998554355	0.002712638	0.085170666
WBGene00015366	9843.900658	-0.291779631	0.097342175	-2.997463646	0.002722363	0.085170666
WBGene00015492	994.292515	-0.283291871	0.09452089	-2.997135052	0.0027253	0.085170666
WBGene00016150	379.6728155	-0.309446335	0.103372025	-2.993521069	0.002757785	0.085170666
WBGene00020146	49840.84544	-0.247336103	0.0825909	-2.994713742	0.002747025	0.085170666
WBGene00219279	247.1385812	-0.358534568	0.119775399	-2.99339071	0.002758963	0.085170666
WBGene00013603	2404.983163	-0.243587044	0.081511831	-2.988364271	0.00280475	0.086165916
WBGene00014259	115.3116512	-0.396374322	0.132694149	-2.98712734	0.002816124	0.086165916
WBGene00020630	1527.785994	-0.337100417	0.112936437	-2.984868532	0.002837002	0.086422338
WBGene00045297	14012.26712	-0.246661539	0.082752851	-2.980701391	0.002875891	0.087222738
WBGene00004744	823.67282	0.261763564	0.087969101	2.975630789	0.002923866	0.087756454
WBGene00013768	308.7418366	0.341233571	0.11470712	2.974824671	0.00293156	0.087756454
WBGene00018013	525.9784385	-0.265108343	0.08908886	-2.975774348	0.002922498	0.087756454
WBGene00012452	5335.830677	-0.450499713	0.151661403	-2.970430864	0.002973823	0.088637881
WBGene00012674	171.0074713	0.387868835	0.130661713	2.968496474	0.002992605	0.088814876
WBGene00004465	1658.077329	0.320086816	0.107995896	2.963879437	0.003037873	0.089385397
WBGene00004700	1741.060438	-0.208584947	0.070349921	-2.964963487	0.003027189	0.089385397
WBGene00016151	707.8768819	0.394979597	0.13337629	2.961392892	0.00306251	0.089385397
WBGene00044154	4326.87238	-0.249743937	0.0843362	-2.961289908	0.003063534	0.089385397
WBGene00170627	206.0639743	-0.345116083	0.116839072	-2.953772897	0.003139149	0.091206794
WBGene00003067	11544.85082	-0.234077376	0.079359464	-2.949583613	0.003182025	0.09130166
WBGene00012898	17820.52712	-0.230493549	0.07812401	-2.950354825	0.003174092	0.09130166
WBGene00021507	451.5949211	0.365979932	0.124040252	2.950493303	0.003172669	0.09130166
WBGene00009161	628.0325736	-0.338644754	0.114979424	-2.945263964	0.003226792	0.091824156
WBGene00012693	321.2491917	0.304075015	0.103233244	2.945514477	0.003224181	0.091824156
WBGene00012731	149.6586418	-0.388704614	0.132104808	-2.942395664	0.003256835	0.092068077
WBGene00017999	230.2162946	0.346247158	0.117704259	2.941670596	0.00326447	0.092068077
WBGene00022366	946.4564758	-0.25218798	0.085759438	-2.940644036	0.003275307	0.092068077
WBGene00010768	255.1142804	-0.310780692	0.105952549	-2.933206374	0.003354808	0.093921046
WBGene00015852	132.7951503	-0.390163291	0.133094517	-2.931475312	0.003373562	0.094065241
WBGene00004312	525.7671634	0.317789961	0.108497315	2.92901223	0.00340041	0.094133718
WBGene00006571	1858.438655	0.344212166	0.117549369	2.928234916	0.003408924	0.094133718
WBGene00013307	791.1367817	0.345159551	0.117902003	2.927512199	0.003416857	0.094133718
WBGene00008339	317.2808882	0.307872034	0.105348234	2.922422349	0.003473202	0.094550406
WBGene00019017	115.535222	-0.489479556	0.167560178	-2.921216502	0.003486674	0.094550406
WBGene00050926	1232.252332	-0.239340854	0.081876261	-2.923202039	0.003464516	0.094550406
WBGene00219887	334.8585	-0.310137389	0.106112524	-2.922721822	0.003469864	0.094550406
WBGene00017186	2721.269844	-0.256824503	0.088029744	-2.917474144	0.003528789	0.095110044
WBGene00197441	125.973626	-0.466532073	0.15993878	-2.916941543	0.00353482	0.095110044
WBGene00000264	829.8620356	0.384842631	0.132030735	2.914795787	0.003559214	0.0951601
WBGene00003214	2982.747414	0.356772478	0.122464083	2.913282572	0.003576508	0.0951601
WBGene00013677	884.8141233	0.317803522	0.109092539	2.913155422	0.003577965	0.0951601
WBGene00015703	145.0235488	0.345083643	0.118611387	2.909363537	0.003621655	0.095626394
WBGene00021637	936.6468079	-0.27133407	0.093281134	-2.908777578	0.003628449	0.095626394
WBGene00050885	266.7567116	-0.333744955	0.11476617	-2.90804297	0.003636984	0.095626394
WBGene00012577	29901.45264	-0.267521215	0.092108849	-2.904402968	0.003679542	0.096378922
WBGene00000393	823.4705853	-0.275700192	0.095256974	-2.894278304	0.003800312	0.096739787
WBGene00007119	3120.270718	-0.302844926	0.104691395	-2.892739428	0.00381898	0.096739787
WBGene00007376	25241.58365	-0.25059612	0.086485956	-2.897535425	0.003761073	0.096739787
WBGene00008441	324.4489139	0.299457857	0.103521239	2.892719013	0.003819228	0.096739787
WBGene00011604	1558.349213	0.26901824	0.092920295	2.895150527	0.003789768	0.096739787
WBGene00016072	4687.927558	-0.238077052	0.082247976	-2.894625067	0.003796117	0.096739787
WBGene00016702	403.3510308	0.324446634	0.112019835	2.896332004	0.003775527	0.096739787
WBGene00022385	3655.088751	-0.296585056	0.102289699	-2.899461629	0.003738041	0.096739787
WBGene00045043	2663.134786	-0.23011767	0.079405438	-2.898008947	0.003755399	0.096739787
WBGene00001520	222.4923826	-0.441784934	0.152974487	-2.88796481	0.003877432	0.09775335
WBGene00003184	1115.36379	0.344636836	0.119369308	2.887147796	0.003887516	0.09775335
WBGene00020684	1637.911164	0.337023962	0.116846241	2.884337212	0.003922385	0.097999833
WBGene00021759	210.1780797	0.367107225	0.127287717	2.884074225	0.003925662	0.097999833
WBGene00044638	806.5680828	-0.275758116	0.095804026	-2.878356233	0.003997534	0.099435074
WBGene00000463	423.2499436	-0.286602698	0.099622281	-2.876893549	0.004016111	0.099539083
WBGene00006930	676.2352459	-0.481846424	0.167575385	-2.875400959	0.004035147	0.099653724
WBGene00008178	1167.224877	-0.245074787	0.08528609	-2.873561043	0.004058726	0.099879334
WBGene00004916	399.303585	0.277690981	0.096843499	2.867419956	0.004138335	0.101416213
WBGene00017681	182.8336701	-0.375472794	0.13098695	-2.86649008	0.004150512	0.101416213
WBGene00013324	330.5916635	0.353427214	0.1234188	2.863641641	0.004188015	0.101614475
WBGene00013499	1621.036943	-0.354361822	0.123702434	-2.864630954	0.004174955	0.101614475
WBGene00006528	937.6037906	0.309296093	0.108135831	2.860255376	0.004233	0.102233029
WBGene00009580	278.5859207	0.295415385	0.103310108	2.859501263	0.004243077	0.102233029
WBGene00009784	385.0862189	0.266125445	0.093344046	2.85101681	0.004357967	0.102639627
WBGene00012767	1005.873661	0.348602825	0.122291571	2.850587512	0.004363854	0.102639627
WBGene00015590	1221.90897	-0.220339475	0.077151833	-2.855920156	0.00429123	0.102639627
WBGene00017941	99.79439395	-0.375868695	0.131802153	-2.851764457	0.00434773	0.102639627
WBGene00019138	985.7974367	-0.24825282	0.086934139	-2.855642488	0.004294985	0.102639627
WBGene00021277	2217.657207	-0.199390386	0.069887044	-2.853037888	0.004330346	0.102639627
WBGene00201453	110.8889211	-0.428103808	0.15000972	-2.853840461	0.004319422	0.102639627
WBGene00004180	543.942681	0.346266783	0.121726225	2.844635848	0.004446222	0.103520628
WBGene00018848	401.8978321	0.281786102	0.099004898	2.846183439	0.00442467	0.103520628
WBGene00196507	115.2272843	-0.476441871	0.167432679	-2.845572766	0.004433163	0.103520628
WBGene00004087	505.7805589	0.291668249	0.1028366	2.836229981	0.004564956	0.104532173
WBGene00006484	398.1050623	-0.452580715	0.159615807	-2.835437935	0.004576291	0.104532173
WBGene00006830	519.1111824	-0.303924227	0.107170995	-2.835881363	0.004569942	0.104532173
WBGene00016178	2335.455381	0.358046875	0.126114387	2.839064473	0.004524601	0.104532173
WBGene00017646	598.9591199	0.346997977	0.122300545	2.837256172	0.004550309	0.104532173
WBGene00021035	384.1706376	0.309747931	0.109252617	2.835153408	0.004580369	0.104532173
WBGene00255565	722.337933	-0.475857886	0.167925536	-2.833743443	0.004600625	0.104649088
WBGene00019316	528.869419	-0.269274335	0.095070888	-2.832353211	0.004620678	0.104760609
WBGene00004239	1414.141869	0.401885945	0.14208041	2.828580972	0.004675487	0.105656843
WBGene00009288	1110.346489	-0.272716471	0.096616162	-2.822679625	0.004762414	0.106036763
WBGene00012196	278.5081665	-0.290473414	0.10305412	-2.818649201	0.004822619	0.106036763
WBGene00013340	438.4112292	0.380720652	0.134768979	2.824987287	0.004728249	0.106036763
WBGene00014884	56617.10591	-0.223783699	0.07925874	-2.823457685	0.00475087	0.106036763
WBGene00018593	469.455086	-0.342778546	0.121591804	-2.819092524	0.004815963	0.106036763
WBGene00019713	675.2142991	-0.259930214	0.092012189	-2.824954131	0.004728738	0.106036763
WBGene00019884	483.6111517	0.261273086	0.092642335	2.820234246	0.00479886	0.106036763
WBGene00021938	600.3125511	0.273069964	0.096897309	2.818137758	0.004830308	0.106036763
WBGene00202015	100.279299	-0.473595103	0.167944662	-2.819947343	0.004803153	0.106036763
WBGene00000801	48917.19067	-0.233022021	0.082928051	-2.80993002	0.004955227	0.10735935
WBGene00004917	292.0844199	0.321202576	0.114395541	2.807824278	0.004987743	0.10735935
WBGene00007024	595.9538809	0.313766566	0.111682854	2.809442577	0.004962737	0.10735935
WBGene00013343	1015.718816	0.326691683	0.116143412	2.812830092	0.004910759	0.10735935
WBGene00017757	601.015354	0.356848173	0.127124195	2.80708305	0.004999235	0.10735935
WBGene00022048	2043.521524	0.321571372	0.114492507	2.808667389	0.004974701	0.10735935
WBGene00022788	269.9324972	-0.383160911	0.136317853	-2.810790388	0.004941997	0.10735935
WBGene00011308	678.7997088	-0.205337588	0.073180892	-2.805890759	0.00501777	0.107423776
WBGene00022296	971.9567198	0.206040716	0.073593102	2.799728658	0.005114558	0.109157925
WBGene00009946	394.7964869	0.320760275	0.114751708	2.795254901	0.005185881	0.110001122
WBGene00014801	12170.38061	-0.226062549	0.080862037	-2.795657353	0.005179428	0.110001122
WBGene00016635	12528.05328	-0.232520534	0.083403622	-2.787894904	0.005305175	0.112187419
WBGene00017890	2296.268636	-0.284293625	0.102166532	-2.782649264	0.005391706	0.112801269
WBGene00019535	761.6463934	-0.240644509	0.086494843	-2.782183307	0.005399453	0.112801269
WBGene00019627	714.0187171	0.32498506	0.116688572	2.785063316	0.005351727	0.112801269
WBGene00020411	314.3053688	0.296043519	0.106354325	2.783558817	0.005376611	0.112801269
WBGene00015096	688.0440807	-0.367665643	0.132203335	-2.781061775	0.005418143	0.112850771
WBGene00003220	763.4367728	0.319771744	0.115121185	2.77769676	0.005474568	0.113004895
WBGene00007555	392.7000768	0.338949321	0.121954199	2.77931654	0.005447341	0.113004895
WBGene00200575	886.9435656	-0.330156805	0.118829677	-2.778403624	0.005462672	0.113004895
WBGene00001043	461.6141165	0.298594118	0.107677059	2.773052326	0.005553319	0.113846922
WBGene00009644	604.1803916	-0.365005189	0.131657563	-2.772383002	0.005564752	0.113846922
WBGene00021107	2697.974846	-0.255135707	0.091987678	-2.77358569	0.005544224	0.113846922
WBGene00006753	643.877168	-0.301947299	0.109091395	-2.76783791	0.005642951	0.11510622
WBGene00001233	254.5672371	0.288507968	0.104513123	2.76049515	0.005771381	0.116476716
WBGene00006536	3354.851234	0.348399334	0.126147224	2.761847006	0.00574754	0.116476716
WBGene00010353	1705.855353	0.345239978	0.125228729	2.756875214	0.005835662	0.116476716
WBGene00012158	217.4042752	-0.354216324	0.128437456	-2.757889601	0.005817584	0.116476716
WBGene00013830	407.9046637	0.428258244	0.155371029	2.756358428	0.005844891	0.116476716
WBGene00018862	4814.839842	-0.185149967	0.067123918	-2.75833075	0.005809738	0.116476716
WBGene00021015	6188.700508	-0.206430174	0.074890047	-2.756443365	0.005843373	0.116476716
WBGene00194678	3101.161209	-0.275031874	0.099614997	-2.760948471	0.005763377	0.116476716
WBGene00004274	1003.896863	0.234689658	0.085205184	2.754405856	0.00587988	0.116837278
WBGene00004953	1286.073376	0.37877128	0.13800485	2.744622971	0.006058045	0.116956035
WBGene00009668	254.8784878	0.322572797	0.117468182	2.746044	0.006031867	0.116956035
WBGene00010550	6361.519871	-0.236460947	0.086107828	-2.746102783	0.006030787	0.116956035
WBGene00013162	2383.66612	-0.283940315	0.103457561	-2.744510033	0.00606013	0.116956035
WBGene00014904	932.7877544	-0.313479296	0.114214491	-2.744654326	0.006057467	0.116956035
WBGene00016412	284.6205224	0.351051305	0.127853625	2.745728205	0.006037676	0.116956035
WBGene00017942	2688.295834	-0.211854233	0.07708192	-2.748429628	0.005988149	0.116956035
WBGene00019723	313.6815483	-0.285510814	0.10405395	-2.743872908	0.006071904	0.116956035
WBGene00019768	240.2916521	-0.290718263	0.1056275	-2.752297117	0.00591788	0.116956035
WBGene00022070	15806.7884	-0.254641054	0.092729635	-2.746059052	0.006031591	0.116956035
WBGene00195448	1228.979793	-0.331124469	0.120460791	-2.74881534	0.005981107	0.116956035
WBGene00012156	1274.305122	0.338102257	0.123462857	2.738493707	0.006172134	0.117865897
WBGene00012828	367.4647353	0.295265543	0.107814707	2.738638841	0.00616941	0.117865897
WBGene00013094	412.2651548	0.281874458	0.103028888	2.735877912	0.00622141	0.117865897
WBGene00021036	1963.088349	-0.245581331	0.089643552	-2.739531469	0.006152682	0.117865897
WBGene00022587	652.366209	-0.272182826	0.099456475	-2.736702938	0.00620583	0.117865897
WBGene00195169	1718.959348	-0.222115583	0.081132631	-2.737684938	0.006187332	0.117865897
WBGene00000840	595.7425847	0.371096733	0.135853434	2.731596265	0.006302832	0.118552373
WBGene00006529	2039.685878	0.277050247	0.101432005	2.731388836	0.006306801	0.118552373
WBGene00009702	843.4538511	-0.256412459	0.093880308	-2.731269908	0.006309078	0.118552373
WBGene00185077	18230.02982	-0.243758249	0.089286717	-2.73006172	0.006332247	0.118665278
WBGene00219319	1519.310352	-0.278672647	0.102121227	-2.728841539	0.006355724	0.118783322
WBGene00022169	267.659035	0.286688992	0.105155127	2.726343463	0.006404032	0.119363563
WBGene00021278	400.8810378	-0.334895375	0.12291084	-2.724701696	0.006435961	0.119546027
WBGene00022855	732.3984461	0.344552988	0.126484901	2.724064182	0.006448397	0.119546027
WBGene00010479	758.4790255	0.313171852	0.115009844	2.723000399	0.006469198	0.119610973
WBGene00014083	337.5735719	0.315456452	0.115998976	2.71947618	0.00653854	0.120570685
WBGene00011550	406.8618037	-0.33721454	0.124118151	-2.716883374	0.006589982	0.121012988
WBGene00013203	165.5951607	-0.350315856	0.128996562	-2.715699178	0.006613598	0.121012988
WBGene00195147	1131.322291	-0.289077646	0.106449662	-2.715627666	0.006615027	0.121012988
WBGene00016167	380.3323533	0.333399869	0.122856426	2.713735693	0.006652922	0.121385113
WBGene00014907	3426.600805	-0.270205022	0.099608523	-2.712669704	0.00667436	0.121455781
WBGene00009276	496.9886687	0.291517357	0.107586192	2.70961684	0.006736097	0.121619097
WBGene00011498	1055.620004	-0.30074417	0.110966363	-2.710228234	0.006723692	0.121619097
WBGene00015266	360.4625047	0.253257748	0.093452845	2.71000574	0.006728204	0.121619097
WBGene00195183	688.9339381	-0.268903069	0.099369163	-2.706101774	0.006807818	0.122593907
WBGene00006977	734.7583335	0.316969532	0.117270657	2.702888684	0.006873976	0.123463756
WBGene00012151	5180.671239	-0.391630602	0.144984014	-2.701198504	0.006909009	0.123771494
WBGene00077787	7434.021474	-0.283741392	0.105097951	-2.699780444	0.006938525	0.123979069
WBGene00013223	937.8687555	0.345570868	0.128076687	2.698155885	0.006972478	0.12417602
WBGene00016421	281.8677408	0.303920274	0.112665861	2.697536517	0.006985462	0.12417602
WBGene00010362	5107.501665	-0.217699086	0.080822936	-2.693531026	0.007069956	0.125035164
WBGene00012366	1287.830449	-0.234800878	0.08715774	-2.693976219	0.00706052	0.125035164
WBGene00013036	11842.29566	-0.282570524	0.105033513	-2.690289178	0.007139013	0.125934369
WBGene00007579	218.2185703	0.361727663	0.134564036	2.688145173	0.007185015	0.126218613
WBGene00022862	348.3989644	0.351590891	0.130844585	2.687087825	0.0072078	0.126218613
WBGene00199557	40158.93224	-0.32444495	0.120746561	-2.686991227	0.007209885	0.126218613
WBGene00003868	702.0991652	-0.205755125	0.076614319	-2.685596226	0.007240052	0.126426672
WBGene00006808	645.5379292	0.2277924	0.084846999	2.684743155	0.007258556	0.126430521
WBGene00001215	4952.740992	-0.163544026	0.061009644	-2.680625827	0.007348463	0.127674932
WBGene00001683	1454.391589	0.296305409	0.11084907	2.673052715	0.007516444	0.128336318
WBGene00003064	258.8675023	0.296031085	0.110697818	2.674226932	0.007490175	0.128336318
WBGene00011734	543.1183955	0.325935091	0.121838456	2.675141335	0.007469775	0.128336318
WBGene00016173	1805.086405	0.297421408	0.111141482	2.6760612	0.007449304	0.128336318
WBGene00019158	261.5155361	0.278481594	0.104173427	2.673249807	0.007512029	0.128336318
WBGene00019940	1570.097237	0.339626568	0.126996229	2.674304359	0.007488446	0.128336318
WBGene00022067	1717.664298	-0.217948351	0.081466871	-2.675300374	0.007466232	0.128336318
WBGene00000250	408.1850163	0.250078561	0.093630475	2.670909888	0.007564595	0.128614809
WBGene00022881	188.9119404	0.352009885	0.131805725	2.670672194	0.007569953	0.128614809
WBGene00007088	3380.264962	-0.184734757	0.069214167	-2.669030999	0.007607043	0.128928191
WBGene00018357	117.0100988	0.349613264	0.13106884	2.667401832	0.007644022	0.129238166
WBGene00011601	616.5249376	0.282454342	0.105992358	2.664855722	0.007702136	0.129903097
WBGene00009662	131.4290105	0.382900926	0.143868385	2.661466775	0.007780102	0.13053929
WBGene00010480	351.3683439	0.363676954	0.13676533	2.659131186	0.007834245	0.13053929
WBGene00013325	129.8154202	-0.335723959	0.126242297	-2.659361939	0.007828881	0.13053929
WBGene00017031	1907.689458	0.29993868	0.11274488	2.660330839	0.007806393	0.13053929
WBGene00022381	369.7891165	0.280460666	0.105403864	2.660819591	0.007795071	0.13053929
WBGene00014309	863.581459	-0.299621809	0.112951784	-2.652652302	0.007986209	0.132751526
WBGene00008121	185.635697	-0.296339246	0.111871988	-2.648913744	0.008075094	0.133907132
WBGene00001088	356.2948197	0.230913094	0.087335936	2.643964266	0.008194131	0.135556013
WBGene00011320	1700.039237	0.378784847	0.143495142	2.639705023	0.008297822	0.136943762
WBGene00013004	281.407198	0.298328769	0.113154085	2.636482546	0.008377051	0.13792216
WBGene00013221	41715.37805	-0.287116583	0.10901338	-2.63377378	0.008444173	0.138697042
WBGene00001905	512.3202015	-0.223602767	0.085091058	-2.627805707	0.008593758	0.140819526
WBGene00004459	2343.148444	0.333752391	0.127113627	2.625622444	0.008649069	0.141390817
WBGene00000247	599.5865738	0.304592968	0.11611919	2.623106204	0.008713211	0.141436272
WBGene00017886	262.3680974	0.306634022	0.116845794	2.624262388	0.008683686	0.141436272
WBGene00197962	130.1055343	-0.440431489	0.16787786	-2.623523375	0.008702547	0.141436272
WBGene00011410	349.4724874	0.355064294	0.135697705	2.616582886	0.00888148	0.143462074
WBGene00015701	662.3790887	-0.246591039	0.094222163	-2.617123522	0.008867425	0.143462074
WBGene00195289	2267.059346	-0.378825065	0.14481844	-2.615862075	0.00890025	0.143462074
WBGene00018688	637.1672018	-0.290183085	0.110998707	-2.614292484	0.008941246	0.143787708
WBGene00002344	525.3617705	0.254770084	0.097560743	2.611399599	0.009017246	0.14467345
WBGene00003411	164.326134	-0.294689104	0.112909052	-2.609968812	0.009055048	0.144943647
WBGene00006514	585.6523125	0.281268317	0.107801358	2.609135195	0.009077137	0.144961672
WBGene00009507	1758.973806	0.277517863	0.106398046	2.608298503	0.009099357	0.144981684
WBGene00018064	624.6354742	0.290620401	0.111646464	2.603041699	0.009240071	0.146885274
WBGene00007110	1077.827601	0.293757451	0.113011631	2.599355919	0.009339888	0.147792503
WBGene00012469	478.8104554	0.304244579	0.117026328	2.599795998	0.009327919	0.147792503
WBGene00194836	360.3626269	-0.287767638	0.110755171	-2.598232083	0.009370514	0.14793859
WBGene00021668	100.9565753	0.398947336	0.153706214	2.595518582	0.00944483	0.148772202
WBGene00219758	8590.396715	-0.270708262	0.104471547	-2.591215214	0.009563766	0.150303279
WBGene00000112	896.5462858	-0.214665782	0.082945088	-2.588046934	0.009652183	0.151062987
WBGene00003073	523.4248288	0.366888984	0.141800747	2.587355783	0.009671567	0.151062987
WBGene00007454	4573.469282	-0.223847215	0.086523059	-2.587139396	0.009677643	0.151062987
WBGene00015194	458.5951151	0.331700851	0.12826464	2.586066207	0.009707828	0.151192864
WBGene00011218	174.3598316	0.345623295	0.133706709	2.584936073	0.009739705	0.151348456
WBGene00001497	729.756838	0.323396503	0.125190855	2.583227838	0.009788066	0.151380455
WBGene00001869	604.5101493	0.365776274	0.141634003	2.582545622	0.009807439	0.151380455
WBGene00018634	1979.486781	-0.238397449	0.092307036	-2.582657391	0.009804263	0.151380455
WBGene00004881	635.9102816	0.327918658	0.127025789	2.581512466	0.009836844	0.151496159
WBGene00001650	535.8474837	0.355913787	0.138930267	2.561816048	0.010412645	0.151586195
WBGene00002240	942.2879523	0.243692202	0.094631131	2.575180055	0.010018792	0.151586195
WBGene00003927	400.888908	0.281412868	0.109846013	2.561885142	0.010410574	0.151586195
WBGene00007242	1558.43771	-0.257211406	0.100274931	-2.565061916	0.01031574	0.151586195
WBGene00007433	2075.14065	0.303730243	0.118532786	2.562415462	0.010394689	0.151586195
WBGene00009254	1036.105946	0.293667453	0.114515162	2.564441678	0.010334195	0.151586195
WBGene00012396	5031.582545	-0.244383252	0.095381887	-2.562155779	0.010402465	0.151586195
WBGene00013352	2202.823517	-0.244804115	0.094980221	-2.577422041	0.009954033	0.151586195
WBGene00014012	815.0874262	0.300024958	0.116324723	2.579202007	0.009902886	0.151586195
WBGene00015020	1773.145603	-0.220222885	0.085836934	-2.565595882	0.010299875	0.151586195
WBGene00015083	699.7276495	0.337714342	0.13113627	2.575293174	0.010015515	0.151586195
WBGene00019341	826.2754487	0.199299772	0.077443911	2.57347246	0.010068366	0.151586195
WBGene00021106	7681.984822	-0.259152772	0.101090245	-2.563578442	0.010359929	0.151586195
WBGene00021375	14124.44451	-0.263690401	0.102930682	-2.561825053	0.010412375	0.151586195
WBGene00021826	317.040906	0.271432775	0.105574597	2.571004606	0.010140398	0.151586195
WBGene00021857	1081.636121	0.330407197	0.128571678	2.569828756	0.01017488	0.151586195
WBGene00022035	174.2815433	0.298057524	0.115522439	2.580083361	0.009877647	0.151586195
WBGene00022205	299.473816	-0.303826104	0.117889226	-2.577216884	0.009959944	0.151586195
WBGene00022206	311.5347308	0.356014009	0.138552938	2.56951614	0.010184065	0.151586195
WBGene00022456	263.8399764	0.264806496	0.103077042	2.569015272	0.010198796	0.151586195
WBGene00044414	708.0980782	-0.332745274	0.129148267	-2.576459451	0.009981791	0.151586195
WBGene00077732	760.2565401	0.301110088	0.117029465	2.572942525	0.010083795	0.151586195
WBGene00195657	244.5011797	-0.380375954	0.148005987	-2.570003835	0.010169739	0.151586195
WBGene00219700	4384.337511	-0.228030724	0.088502569	-2.576543565	0.009979363	0.151586195
WBGene00219800	795.3597942	-0.281979445	0.10963803	-2.57191273	0.010113838	0.151586195
WBGene00255736	19465.61003	-0.224774214	0.087616372	-2.56543623	0.010304616	0.151586195
WBGene00012562	661.1208598	0.263822148	0.103016849	2.560961142	0.010438303	0.151640474
WBGene00002263	1089.851044	0.270688103	0.105775364	2.559084573	0.010494821	0.151656288
WBGene00013652	192.3507089	0.41679434	0.162890374	2.558741381	0.010505186	0.151656288
WBGene00021055	3601.62321	-0.197938033	0.077337043	-2.559420767	0.010484675	0.151656288
WBGene00021813	238.315487	0.354827265	0.13882351	2.555959467	0.010589545	0.152555638
WBGene00013152	12683.57601	-0.233855659	0.091588684	-2.553324808	0.010669994	0.15339503
WBGene00003041	877.8403562	0.318748287	0.124914824	2.551725064	0.010719107	0.153462988
WBGene00200927	580.8511922	-0.312692936	0.122514717	-2.552288768	0.010701778	0.153462988
WBGene00011350	796.6653085	0.301338738	0.11823285	2.548688779	0.010812875	0.154485597
WBGene00013345	130.7970748	0.327345565	0.128533668	2.546769039	0.010872537	0.154779606
WBGene00016990	338.4761844	0.304162805	0.119444367	2.546480945	0.010881515	0.154779606
WBGene00045434	257.145409	0.295889836	0.116223503	2.54586919	0.010900603	0.154779606
WBGene00001080	1430.441618	0.301115562	0.118339222	2.544511939	0.010943057	0.155064016
WBGene00020588	3742.842113	0.255220885	0.100339849	2.543564577	0.010972777	0.155167187
WBGene00000249	234.0654948	0.368627281	0.145003982	2.542187304	0.011016112	0.155309525
WBGene00044217	16082.64603	-0.240712069	0.094700754	-2.541817861	0.011027762	0.155309525
WBGene00001680	606.4566383	-0.260665143	0.102613918	-2.540251333	0.011077283	0.155689867
WBGene00001230	591.8943128	0.312445604	0.123206669	2.535947183	0.011214365	0.155806653
WBGene00001584	508.5880708	0.273770206	0.107896671	2.537336914	0.01116994	0.155806653
WBGene00003947	795.8623642	0.26576136	0.104805421	2.535759681	0.01122037	0.155806653
WBGene00003951	1356.914336	0.247182234	0.09735272	2.539037782	0.011115782	0.155806653
WBGene00012643	238.1749945	0.282333667	0.111229906	2.538289187	0.011139589	0.155806653
WBGene00022446	8181.153839	-0.213159689	0.084061898	-2.53574681	0.011220783	0.155806653
WBGene00022278	436.4804556	0.311583473	0.122913044	2.53499111	0.011245018	0.155830259
WBGene00017101	654.9561195	-0.283097424	0.11173944	-2.533549698	0.011291373	0.156159685
WBGene00001648	477.943548	0.228793295	0.090361546	2.531976319	0.011342165	0.156172298
WBGene00014014	403.4221073	0.317251735	0.125325396	2.53142415	0.011360038	0.156172298
WBGene00015025	275.4077485	0.330444764	0.130483566	2.532462713	0.011326442	0.156172298
WBGene00013804	206.6397922	0.299055714	0.118175005	2.530617318	0.0113862	0.156221375
WBGene00002184	4454.957291	-0.258300216	0.102258011	-2.525965574	0.011538079	0.156529406
WBGene00004355	970.969898	0.280705926	0.111079675	2.527068311	0.011501913	0.156529406
WBGene00012976	109.3890869	0.329648145	0.130383291	2.528300537	0.011461619	0.156529406
WBGene00017812	173.9879643	0.371878031	0.147231693	2.525801502	0.011543468	0.156529406
WBGene00018537	4203.074066	-0.260104821	0.102846763	-2.529052084	0.011437105	0.156529406
WBGene00020306	8239.326146	-0.252388667	0.099925393	-2.525771072	0.011544468	0.156529406
WBGene00007577	1171.19177	-0.17833916	0.070705287	-2.522288885	0.011659391	0.157470099
WBGene00012645	316.3387357	0.326378305	0.129390857	2.52242169	0.01165499	0.157470099
WBGene00012564	575.6267959	-0.25364199	0.100618901	-2.520818537	0.011708221	0.157798091
WBGene00013441	750.0295066	0.317618019	0.126029642	2.520185034	0.011729316	0.157798091
WBGene00001179	117.0366729	-0.35489814	0.140920287	-2.51843186	0.011787869	0.157886546
WBGene00004303	1046.346803	0.236983496	0.094219683	2.515222804	0.011895718	0.157886546
WBGene00004339	461.1435087	0.238726977	0.094898271	2.515609341	0.011882681	0.157886546
WBGene00008447	44607.01945	-0.36812489	0.146243306	-2.517208482	0.011828881	0.157886546
WBGene00010498	268.0109038	0.316032256	0.125447939	2.519230357	0.011761168	0.157886546
WBGene00013460	768.8896357	0.31043189	0.123363908	2.5163915	0.01185634	0.157886546
WBGene00022369	875.4281064	0.268585483	0.106717843	2.516781413	0.011843228	0.157886546
WBGene00009664	150.6671168	0.283656293	0.112902169	2.512407826	0.011991043	0.158447228
WBGene00012890	922.2708962	-0.207901364	0.082762642	-2.51201942	0.012004248	0.158447228
WBGene00013163	8912.19419	-0.276662936	0.110138831	-2.511947278	0.012006702	0.158447228
WBGene00003052	1979.353432	0.268986358	0.107133708	2.510753734	0.012047371	0.158681085
WBGene00007545	1635.534965	-0.184514395	0.073580896	-2.50763997	0.012154043	0.158919307
WBGene00010778	493.5428819	0.230578506	0.091894812	2.509156937	0.01210197	0.158919307
WBGene00016971	1392.981402	0.31532142	0.125726239	2.508000094	0.012141663	0.158919307
WBGene00219304	6069.063692	-0.250634091	0.099952068	-2.507542837	0.012157384	0.158919307
WBGene00004905	1147.735553	-0.205680673	0.082091299	-2.505511259	0.012227451	0.158933873
WBGene00006709	126.0740414	0.374501867	0.149437024	2.506084886	0.012207631	0.158933873
WBGene00021372	164.6935533	-0.325775622	0.130010958	-2.505755114	0.012219021	0.158933873
WBGene00000140	2870.602847	-0.254372274	0.101941173	-2.495284938	0.012585602	0.159443242
WBGene00000265	628.4925359	0.29966226	0.119716548	2.503098059	0.012311143	0.159443242
WBGene00004463	634.7511757	0.326470823	0.131364645	2.485225942	0.012946923	0.159443242
WBGene00004895	310.2616067	0.295091434	0.118530638	2.489579401	0.012789435	0.159443242
WBGene00005308	205.1745148	-0.270651659	0.108935525	-2.484512356	0.012972901	0.159443242
WBGene00007225	162.6190523	0.38493051	0.154611144	2.489668602	0.012786226	0.159443242
WBGene00008506	1844.173597	0.310943876	0.12452752	2.496989223	0.012525276	0.159443242
WBGene00008549	342.4543925	0.337667106	0.135756428	2.487301057	0.012871642	0.159443242
WBGene00010621	4282.863012	0.252261732	0.101220838	2.492191695	0.01269575	0.159443242
WBGene00010677	1006.191284	0.242624446	0.097604176	2.485799839	0.012926065	0.159443242
WBGene00012342	828.9147008	0.279299326	0.112026043	2.493164256	0.012661026	0.159443242
WBGene00012632	385.3901538	-0.303715188	0.122091921	-2.487594479	0.012861029	0.159443242
WBGene00012675	439.7273034	-0.230316711	0.092458853	-2.491018469	0.01273775	0.159443242
WBGene00012694	486.9805682	0.311090081	0.125066428	2.487398796	0.012868106	0.159443242
WBGene00013200	380.1757179	0.297026735	0.119010096	2.495811234	0.012566946	0.159443242
WBGene00014660	218.5087019	-0.380947057	0.153322214	-2.484617516	0.012969069	0.159443242
WBGene00014811	949.3198435	-0.24381956	0.097669099	-2.496383821	0.012546676	0.159443242
WBGene00016561	46683.19234	-0.224079807	0.090091155	-2.487256456	0.012873256	0.159443242
WBGene00017532	226.8143212	0.311625936	0.125439211	2.484278505	0.012981424	0.159443242
WBGene00019197	374.4314561	-0.273096074	0.109288606	-2.498852199	0.012459626	0.159443242
WBGene00019872	6962.163566	-0.21274381	0.085598791	-2.48535999	0.012942049	0.159443242
WBGene00020284	1757.642564	0.322199832	0.12896941	2.498265534	0.012480267	0.159443242
WBGene00020970	825.2117669	0.273131455	0.109461916	2.49521903	0.01258794	0.159443242
WBGene00021014	1427.44235	0.248229914	0.099589921	2.492520435	0.012684003	0.159443242
WBGene00021538	547.4698525	0.332416844	0.133405551	2.491776713	0.012710592	0.159443242
WBGene00022749	1729.330813	-0.214601555	0.085866868	-2.49923584	0.012446145	0.159443242
WBGene00044134	816.8186289	-0.22689602	0.090716387	-2.501158043	0.012378792	0.159443242
WBGene00044559	880.6016394	-0.275728573	0.110618641	-2.492604952	0.012680985	0.159443242
WBGene00044989	321.8457075	0.34274038	0.137651159	2.489920052	0.012777183	0.159443242
WBGene00195930	175.6312918	-0.396853649	0.159722683	-2.484641764	0.012968186	0.159443242
WBGene00196627	106.5402648	-0.375752657	0.150927359	-2.48962586	0.012787763	0.159443242
WBGene00018339	480.2078791	0.260592884	0.104963462	2.482700931	0.013039051	0.159867085
WBGene00021536	517.4186041	0.257968639	0.104240081	2.47475479	0.013332768	0.163178923
WBGene00001647	248.2450755	0.360977972	0.145949646	2.473304888	0.013386988	0.163553043
WBGene00003955	308.4764703	0.303630055	0.122865553	2.471238267	0.013464607	0.163634025
WBGene00016076	2529.414131	-0.214735822	0.086868139	-2.471974479	0.013436911	0.163634025
WBGene00022117	330.3237789	0.244051951	0.098734367	2.471803465	0.01344334	0.163634025
WBGene00012536	132.9335907	-0.360821925	0.14615696	-2.468729	0.013559386	0.163636856
WBGene00014663	32964.8518	-0.223275942	0.090375562	-2.470534475	0.013491131	0.163636856
WBGene00018011	630.8498465	-0.20214231	0.081881223	-2.468726089	0.013559497	0.163636856
WBGene00021651	644.4288441	-0.242969541	0.098393536	-2.469364874	0.013535313	0.163636856
WBGene00010814	507.3675303	0.296751793	0.120259033	2.467605007	0.013602032	0.163864201
WBGene00007445	876.1038234	0.250719721	0.101737959	2.464367513	0.01372553	0.164777842
WBGene00021887	414.7496087	-0.237935103	0.09653907	-2.464650878	0.013714681	0.164777842
WBGene00021187	174.0926058	-0.393877538	0.159871043	-2.463720325	0.013750336	0.164789551
WBGene00000615	902.2296904	-0.220541621	0.089549231	-2.462797478	0.013785776	0.164928445
WBGene00019517	50864.93655	-0.220618562	0.089630806	-2.461414459	0.013839039	0.165279719
WBGene00197595	516.3326868	-0.282920212	0.115040409	-2.45931159	0.013920374	0.165964462
WBGene00018679	269.0199903	0.346673647	0.141101286	2.456913444	0.014013645	0.166788903
WBGene00009788	12956.06583	-0.222621796	0.090644013	-2.456001097	0.014049273	0.166925639
WBGene00001568	1079.752056	0.326759068	0.133521608	2.447237372	0.0143956	0.167652442
WBGene00002222	5909.235343	-0.224246224	0.091479414	-2.451329906	0.014232944	0.167652442
WBGene00003815	383.3173711	0.265826692	0.108625871	2.447176626	0.014398026	0.167652442
WBGene00009065	1362.829821	0.219127283	0.089520829	2.447779871	0.014373944	0.167652442
WBGene00011292	690.8406402	0.280665624	0.11446383	2.452002727	0.014206359	0.167652442
WBGene00011884	572.2402214	0.329401916	0.134408321	2.450755373	0.01425568	0.167652442
WBGene00012868	709.0244851	0.330556745	0.134922178	2.449980803	0.014286383	0.167652442
WBGene00016885	14722.74256	-0.199546035	0.081372112	-2.452265656	0.014195981	0.167652442
WBGene00017347	367.2777811	0.261570352	0.106762725	2.450015695	0.014284999	0.167652442
WBGene00019142	200.9673492	-0.335900638	0.137140243	-2.449322169	0.014312537	0.167652442
WBGene00050920	4344.347371	-0.219772308	0.089809557	-2.447092655	0.014401381	0.167652442
WBGene00194651	165.7709334	-0.282038288	0.115214708	-2.447936496	0.014367698	0.167652442
WBGene00000898	2139.94546	-0.207187353	0.084931	-2.439478555	0.014708476	0.167726969
WBGene00000939	1178.434951	0.266085314	0.108992792	2.441311115	0.014634041	0.167726969
WBGene00001470	138.6583064	0.381326873	0.156533927	2.436065329	0.014848003	0.167726969
WBGene00001947	169.512198	-0.288616716	0.118095028	-2.443936222	0.014527995	0.167726969
WBGene00006562	603.5383177	0.245068369	0.100620832	2.43556293	0.014868638	0.167726969
WBGene00007111	1243.518619	0.317968808	0.130165621	2.442801765	0.01457374	0.167726969
WBGene00007332	392.276745	0.305495161	0.125211799	2.439827265	0.014694286	0.167726969
WBGene00008361	1192.042665	0.265708139	0.109061173	2.436322028	0.014837469	0.167726969
WBGene00009917	380.6693163	-0.275480558	0.113083762	-2.436075293	0.014847594	0.167726969
WBGene00011888	174.0194868	-0.267877847	0.109544605	-2.445376905	0.014470083	0.167726969
WBGene00012623	9424.085138	-0.234155059	0.096032174	-2.438298019	0.014756603	0.167726969
WBGene00012769	1575.195245	0.292558024	0.119882923	2.440364448	0.014672451	0.167726969
WBGene00014643	192.0118679	-0.284470421	0.116321103	-2.445561573	0.014462675	0.167726969
WBGene00019079	538.724133	0.271676827	0.111351512	2.439812648	0.014694881	0.167726969
WBGene00019246	499.6664574	0.253169832	0.103867233	2.437436949	0.014791794	0.167726969
WBGene00019821	572.8344939	0.238774851	0.098003476	2.43639166	0.014834613	0.167726969
WBGene00021038	545.8718469	0.232002011	0.095225676	2.436338832	0.014836779	0.167726969
WBGene00198146	404.5576833	-0.367109545	0.150389658	-2.441055795	0.014644392	0.167726969
WBGene00269438	9462.263143	-0.220333642	0.090211435	-2.442413679	0.014589418	0.167726969
WBGene00018394	3298.297234	-0.328013894	0.134764828	-2.433972569	0.014934127	0.167917865
WBGene00022059	1483.851603	0.25041646	0.102870232	2.43429468	0.014920842	0.167917865
WBGene00044487	193.1612908	-0.297773382	0.12237795	-2.433227408	0.014964899	0.167990707
WBGene00000761	475.4181693	0.203422244	0.083630292	2.432399064	0.014999171	0.168102545
WBGene00008729	575.0525962	0.29124579	0.119782269	2.431459948	0.015038111	0.16826624
WBGene00016121	467.6434339	-0.219315634	0.090239143	-2.430382509	0.015082895	0.168494704
WBGene00003920	1316.872525	0.252400502	0.103932913	2.428494447	0.015161657	0.169101387
WBGene00021686	695.9581651	0.316992281	0.130604643	2.427113406	0.015219498	0.169419679
WBGene00022036	1102.743575	-0.24355416	0.100366658	-2.426644126	0.015239196	0.169419679
WBGene00006993	1226.96636	0.30454169	0.125541147	2.425831664	0.015273353	0.169526862
WBGene00012964	585.8381102	0.272898827	0.112588932	2.423851277	0.015356893	0.170180955
WBGene00013349	250.714327	0.336055022	0.138931427	2.418855322	0.015569431	0.172260188
WBGene00020091	918.5009681	0.302623248	0.125171845	2.417662271	0.015620567	0.172549878
WBGene00202176	410.0498891	-0.404396676	0.167455502	-2.414950064	0.015737367	0.173562828
WBGene00003952	280.0141112	0.306446203	0.126931998	2.414254948	0.015767425	0.173617429
WBGene00001830	2056.717263	0.32988986	0.136709791	2.413066819	0.015818919	0.173692192
WBGene00021056	497.4516447	0.330715132	0.137059031	2.412939378	0.015824451	0.173692192
WBGene00016703	248.6279534	-0.302896098	0.12563252	-2.410968896	0.015910205	0.174356687
WBGene00002226	9400.743907	0.279397175	0.115996713	2.408664585	0.016011005	0.174845289
WBGene00012243	492.8304818	0.305725927	0.126951149	2.40821709	0.016030645	0.174845289
WBGene00012659	369.9179729	-0.23275726	0.096615329	-2.409113145	0.015991339	0.174845289
WBGene00012802	1924.459236	0.189244151	0.078620398	2.407061715	0.016081452	0.175123214
WBGene00194812	143.0103432	-0.317906029	0.132105686	-2.406452278	0.016108308	0.175139863
WBGene00015133	342.8619145	0.331832899	0.137978171	2.404966634	0.016173942	0.175356939
WBGene00077636	9127.929265	-0.255706922	0.106329563	-2.404852564	0.016178992	0.175356939
WBGene00000814	243.8023629	0.265540214	0.110628928	2.400278293	0.016382612	0.175579804
WBGene00001855	2314.650462	0.20647315	0.086142629	2.396875422	0.016535545	0.175579804
WBGene00001941	483.2154274	-0.268297137	0.112028332	-2.394904318	0.016624703	0.175579804
WBGene00001975	99.59095923	0.325348951	0.135596705	2.399386845	0.016422555	0.175579804
WBGene00004377	760.526356	-0.291482124	0.121448889	-2.40003945	0.016393305	0.175579804
WBGene00004747	398.4123162	-0.236786641	0.098995633	-2.391889771	0.016761876	0.175579804
WBGene00006311	1280.439367	0.285810889	0.119000023	2.401771711	0.016315887	0.175579804
WBGene00006575	173.7209357	0.370893695	0.154309969	2.403562765	0.01623618	0.175579804
WBGene00006591	140.6207072	-0.369861617	0.154040934	-2.401060596	0.016347629	0.175579804
WBGene00006596	436.0153692	0.248465905	0.103786871	2.394001307	0.016665689	0.175579804
WBGene00007150	593.8803806	0.322025148	0.134103489	2.401318195	0.016336124	0.175579804
WBGene00007501	883.6504371	0.283931577	0.118612254	2.393779465	0.016675772	0.175579804
WBGene00011629	1341.216432	0.247390254	0.103393463	2.392706913	0.016724595	0.175579804
WBGene00012758	1430.934982	-0.213121672	0.088906092	-2.397154871	0.016522938	0.175579804
WBGene00013236	2598.058091	-0.166485367	0.069622769	-2.391248844	0.016791168	0.175579804
WBGene00013250	525.9560697	0.25016202	0.104478987	2.394376398	0.016648654	0.175579804
WBGene00013465	322.8315653	0.238771735	0.099783697	2.392893243	0.016716104	0.175579804
WBGene00013984	259.237472	-0.251640024	0.104923232	-2.398325139	0.016470238	0.175579804
WBGene00015813	1041.328931	0.219413484	0.091744415	2.391573205	0.016776338	0.175579804
WBGene00019814	5438.934713	-0.226312328	0.094655547	-2.390904019	0.016806946	0.175579804
WBGene00021486	516.8589329	0.224284829	0.093456676	2.399880235	0.016400437	0.175579804
WBGene00021644	418.7656624	0.314675612	0.131271362	2.397138314	0.016523685	0.175579804
WBGene00022599	913.6566141	0.259114466	0.108377078	2.390860428	0.016808941	0.175579804
WBGene00199492	148.9528028	-0.397595697	0.166138109	-2.393163732	0.016703785	0.175579804
WBGene00007017	741.0455043	0.22609921	0.094746939	2.386348444	0.01701662	0.176416678
WBGene00007941	2336.092972	-0.254679323	0.106702524	-2.386816304	0.016994981	0.176416678
WBGene00009365	1810.660619	0.25539975	0.106991473	2.387103775	0.016981697	0.176416678
WBGene00019311	211.0451727	-0.280976516	0.117635722	-2.388530562	0.016915901	0.176416678
WBGene00022762	461.7493779	0.294231404	0.123252975	2.387215433	0.01697654	0.176416678
WBGene00006393	303.4967076	-0.228350615	0.095732589	-2.385296564	0.017065358	0.176657112
WBGene00001872	504.1639661	0.22970604	0.09634509	2.384200793	0.01711626	0.176910211
WBGene00004458	2240.934884	0.286691278	0.120273067	2.383669798	0.017140975	0.176910211
WBGene00002297	1201.317826	0.289652416	0.121558681	2.382819661	0.017180609	0.176951527
WBGene00020717	424.0981006	0.330861574	0.138872375	2.382486615	0.017196157	0.176951527
WBGene00011352	584.804158	0.292632532	0.122875529	2.381536291	0.017240592	0.17714516
WBGene00000836	998.8245334	0.259337019	0.10893976	2.38055434	0.017286611	0.177348823
WBGene00015469	2321.95476	-0.24658015	0.103604243	-2.380019812	0.017311707	0.177348823
WBGene00007412	592.6640662	0.326704009	0.137352262	2.378584845	0.017379237	0.177349876
WBGene00007880	189.9558745	0.328695741	0.138245016	2.377631768	0.017424216	0.177349876
WBGene00016156	241.5842056	0.256603285	0.107973037	2.376549665	0.017475409	0.177349876
WBGene00016981	949.375646	0.313993579	0.132083493	2.377235581	0.017442944	0.177349876
WBGene00021200	285.2268697	0.262549539	0.110490721	2.376213478	0.01749134	0.177349876
WBGene00022466	736.9011526	0.226035382	0.095013239	2.378988272	0.017360228	0.177349876
WBGene00219278	288.0072073	-0.325194521	0.136799788	-2.377156616	0.017446679	0.177349876
WBGene00018421	386.4604622	0.228396169	0.096155826	2.375271243	0.017536058	0.177537418
WBGene00019157	338.1209881	0.321237599	0.135272589	2.374742742	0.017561185	0.177537418
WBGene00017185	7703.896847	-0.23983388	0.101025403	-2.37399578	0.017596752	0.177637281
WBGene00021515	1899.197587	-0.245884338	0.103600704	-2.373384827	0.017625889	0.177672046
WBGene00000203	219.9812791	0.261993429	0.110799359	2.364575319	0.018050756	0.178341156
WBGene00001033	103.0190858	0.334261201	0.141267902	2.366151095	0.017974107	0.178341156
WBGene00004501	487.2356526	0.274099017	0.115921513	2.364522419	0.018053335	0.178341156
WBGene00004698	1258.033038	0.276403901	0.116665106	2.369207984	0.017826226	0.178341156
WBGene00009921	188.5891832	0.271880058	0.114872531	2.36679784	0.017942731	0.178341156
WBGene00010552	186.6061515	0.302892472	0.128042759	2.365557209	0.018002962	0.178341156
WBGene00017275	306.2163454	0.262882458	0.110946277	2.36945724	0.017814215	0.178341156
WBGene00018208	225.3611227	-0.249683947	0.105478388	-2.367157413	0.017925307	0.178341156
WBGene00018812	1587.457716	0.303179663	0.127915435	2.370156991	0.017780534	0.178341156
WBGene00020081	98.86602919	-0.314276875	0.13290192	-2.364727873	0.018043323	0.178341156
WBGene00021829	248.2834996	0.303949501	0.12837342	2.367698085	0.017899136	0.178341156
WBGene00022181	706.1827032	-0.300905414	0.127195436	-2.365693481	0.017996337	0.178341156
WBGene00219451	4493.636897	-0.396980816	0.167593158	-2.36871732	0.01784989	0.178341156
WBGene00219661	3197.940027	-0.255774228	0.107937148	-2.369658942	0.017804501	0.178341156
WBGene00021534	813.2828936	0.207304791	0.087741031	2.36268926	0.018142875	0.178970015
WBGene00017986	149.7138504	0.336891089	0.142722224	2.360466915	0.018251946	0.179789471
WBGene00002061	531.7800489	0.264645831	0.112317443	2.3562309	0.018461438	0.180795717
WBGene00003801	1905.544679	0.331512228	0.140855473	2.353562995	0.018594457	0.180795717
WBGene00007100	775.5339806	0.287078219	0.122024925	2.352619503	0.018641699	0.180795717
WBGene00008766	197.3277389	0.312591862	0.132648084	2.356550144	0.018445577	0.180795717
WBGene00010420	675.0406277	0.260027944	0.110505278	2.353081675	0.018618544	0.180795717
WBGene00012030	462.8707503	0.274703461	0.116633976	2.355261065	0.018509696	0.180795717
WBGene00013685	34720.7211	-0.215080623	0.091302987	-2.355680035	0.018488835	0.180795717
WBGene00018118	349.3230834	0.275099713	0.11690495	2.353191313	0.018613055	0.180795717
WBGene00018793	183.9588345	0.322293421	0.13679542	2.356024945	0.018471677	0.180795717
WBGene00021460	696.3998048	0.217814322	0.09256788	2.353022703	0.018621497	0.180795717
WBGene00043068	128.7933041	-0.294791381	0.12522996	-2.354000443	0.018572589	0.180795717
WBGene00007099	542.27614	-0.231089659	0.098324231	-2.350281895	0.018759198	0.181448879
WBGene00014814	12055.02442	-0.217822805	0.092701778	-2.349715494	0.018787765	0.181448879
WBGene00018363	399.673959	-0.262310952	0.111617122	-2.350096	0.01876857	0.181448879
WBGene00001915	107.0454701	-0.305435679	0.130062449	-2.34837712	0.01885542	0.181848294
WBGene00004467	2084.842683	0.293518661	0.125030049	2.347584942	0.018895564	0.18191082
WBGene00006381	1395.199443	0.321568974	0.13704029	2.346528703	0.018949207	0.18191082
WBGene00020447	424.6139643	0.235025102	0.100132721	2.347135869	0.018918355	0.18191082
WBGene00044256	6874.289246	-0.227797227	0.097092968	-2.346176376	0.01896713	0.18191082
WBGene00016741	270.4552888	0.341789243	0.145802618	2.344191391	0.019068384	0.182628632
WBGene00006383	1846.194412	0.233526624	0.099698885	2.342319316	0.019164311	0.182825201
WBGene00008533	676.2589276	0.222370535	0.094920386	2.342705762	0.019144474	0.182825201
WBGene00045311	2022.899829	-0.30238268	0.129099613	-2.342243116	0.019168224	0.182825201
WBGene00043534	3681.368667	-0.218055363	0.093162723	-2.340585983	0.019253504	0.183385652
WBGene00000410	1006.742575	0.266977064	0.114167678	2.338464514	0.019363164	0.18362999
WBGene00002221	5034.946416	0.29853161	0.127636795	2.338914959	0.019339835	0.18362999
WBGene00004978	625.4288704	0.272911307	0.116726732	2.338036042	0.019385379	0.18362999
WBGene00010093	742.8048488	0.254022808	0.108639229	2.338223596	0.019375652	0.18362999
WBGene00014020	120.9531033	0.285254492	0.122051282	2.337169166	0.01943039	0.183804576
WBGene00195186	1926.826819	-0.255608744	0.109404593	-2.336362101	0.019472377	0.183950123
WBGene00001335	176.3848314	-0.30895879	0.132408692	-2.33337242	0.019628608	0.184064435
WBGene00003034	1533.430979	0.312649086	0.134007278	2.333075426	0.019644187	0.184064435
WBGene00003821	942.970334	0.285413458	0.122304734	2.333625599	0.019615335	0.184064435
WBGene00003901	886.2782154	0.284710754	0.121909071	2.335435343	0.01952069	0.184064435
WBGene00016452	222.4068319	-0.273047485	0.116943186	-2.334872989	0.019550057	0.184064435
WBGene00023409	293.165687	0.273877788	0.117351149	2.333831333	0.019604555	0.184064435
WBGene00011259	158.1684808	0.369551136	0.158475601	2.331911874	0.019705328	0.184387471
WBGene00010931	369.6588009	-0.28437791	0.122011724	-2.330742489	0.019766942	0.184714062
WBGene00017855	987.330239	0.284050502	0.121927803	2.329661442	0.019824052	0.184997732
WBGene00001589	831.46037	0.288150037	0.12391848	2.325319324	0.020054892	0.185052254
WBGene00001596	1367.538787	0.253499039	0.109049013	2.324633962	0.020091541	0.185052254
WBGene00002335	706.2176982	0.242093894	0.104050694	2.326691769	0.019981676	0.185052254
WBGene00004321	4068.245496	-0.200734423	0.086323084	-2.325385222	0.020051371	0.185052254
WBGene00006439	926.2007208	0.159876099	0.068683478	2.327722807	0.019926827	0.185052254
WBGene00017163	599.6880393	0.273768916	0.117774257	2.324522551	0.020097504	0.185052254
WBGene00018045	273.4795076	0.247166508	0.106155106	2.328352518	0.019893393	0.185052254
WBGene00018900	2638.226237	0.321190877	0.138079774	2.326125456	0.020011859	0.185052254
WBGene00044530	227.787647	-0.307012405	0.13194994	-2.326733944	0.01997943	0.185052254
WBGene00045058	14946.01134	-0.233012759	0.100068579	-2.328530709	0.019883941	0.185052254
WBGene00012245	599.6088749	0.248860104	0.107133355	2.322900314	0.020184508	0.185606216
WBGene00012219	3165.726761	-0.243929567	0.105093454	-2.321072897	0.02028291	0.185769963
WBGene00013141	111.7465516	0.327981611	0.141297855	2.321207288	0.020275659	0.185769963
WBGene00021186	1518.384704	-0.339950909	0.146442384	-2.321396987	0.020265428	0.185769963
WBGene00003158	1305.652029	0.305209404	0.131685664	2.317711691	0.020464995	0.186041039
WBGene00006988	902.0485256	0.294807074	0.127218206	2.317334004	0.020485544	0.186041039
WBGene00012237	1366.179843	-0.215454186	0.092964084	-2.317606714	0.020470705	0.186041039
WBGene00012358	188.2656109	-0.378902472	0.16341659	-2.318629171	0.020415152	0.186041039
WBGene00015912	392.4702604	0.26446634	0.114163413	2.31655952	0.020527739	0.186041039
WBGene00019076	285.6759169	0.246169566	0.106207141	2.317825	0.020458834	0.186041039
WBGene00022027	152.0903792	0.335347107	0.144656292	2.318233809	0.020436618	0.186041039
WBGene00022371	253.6340984	-0.223352834	0.096410248	-2.316691832	0.020520525	0.186041039
WBGene00000865	417.3872609	0.264957778	0.114411524	2.3158312	0.020567487	0.186157294
WBGene00017895	796.628624	0.296469918	0.128116158	2.314071253	0.020663814	0.186784672
WBGene00001994	103.7764948	-0.320327825	0.138491351	-2.312980716	0.020723699	0.187081438
WBGene00001173	630.4152997	0.194994583	0.084401663	2.310316849	0.020870619	0.188162098
WBGene00015413	189.8611935	0.301791799	0.130743477	2.308274226	0.020983889	0.188936969
WBGene00001284	1461.296878	0.29267832	0.12685223	2.307238266	0.021041541	0.188963968
WBGene00044321	1114.740652	0.261430284	0.113306824	2.307277477	0.021039356	0.188963968
WBGene00013779	4070.482779	-0.24476961	0.106143388	-2.306027861	0.021109076	0.189079349
WBGene00019008	1124.00216	0.315114284	0.136630638	2.306322279	0.021092631	0.189079349
WBGene00009962	1393.121827	-0.237786339	0.103143907	-2.305384266	0.021145062	0.189156667
WBGene00001130	153.3713913	0.341272001	0.148125901	2.303931977	0.021226462	0.189394822
WBGene00003405	746.917776	0.224914918	0.097601826	2.30441301	0.02119947	0.189394822
WBGene00016995	132.3163383	0.356688223	0.154867011	2.303190459	0.021268129	0.189522055
WBGene00021756	625.6886975	0.270324263	0.117444895	2.301711474	0.021351449	0.189852899
WBGene00197413	125.0671506	-0.356330363	0.154821437	-2.301557007	0.021360167	0.189852899
WBGene00000039	145.2004946	-0.305905129	0.133032652	-2.29947404	0.021478036	0.189924064
WBGene00004031	1559.764734	0.282749385	0.12295702	2.299579021	0.021472082	0.189924064
WBGene00011597	567.5454593	0.237712842	0.10337647	2.299486925	0.021477305	0.189924064
WBGene00019766	1968.459236	0.330791999	0.143799607	2.300367889	0.021427386	0.189924064
WBGene00000548	581.0495886	0.239730539	0.104295163	2.298577733	0.021528929	0.18994618
WBGene00015456	7489.569871	-0.222328027	0.096729017	-2.298462597	0.021535474	0.18994618
WBGene00001095	277.0008602	0.284344786	0.123950676	2.294015621	0.021789601	0.19052527
WBGene00001678	489.7925975	-0.181586674	0.07925415	-2.291194529	0.021952165	0.19052527
WBGene00002059	328.8594	0.240792941	0.104973301	2.29384938	0.021799152	0.19052527
WBGene00008062	1206.036749	0.24939252	0.108823375	2.291718307	0.021921903	0.19052527
WBGene00011464	796.4495118	0.208108255	0.09068427	2.294866086	0.0217408	0.19052527
WBGene00011871	412.1711003	0.241511916	0.105421823	2.290910056	0.021968616	0.19052527
WBGene00012471	1739.984006	0.231889065	0.101051993	2.29475005	0.021747453	0.19052527
WBGene00013403	6238.606669	-0.222943721	0.097376932	-2.289492154	0.022050773	0.19052527
WBGene00014058	299.2022531	0.268018039	0.116974549	2.291250875	0.021948908	0.19052527
WBGene00017930	2285.634656	-0.385700146	0.167996902	-2.295876544	0.021682941	0.19052527
WBGene00017951	1821.87763	0.275134649	0.120129721	2.29031289	0.022003185	0.19052527
WBGene00018193	1815.513024	-0.230282494	0.100565547	-2.289874617	0.022028586	0.19052527
WBGene00018305	495.6107681	0.279352568	0.122024646	2.289312656	0.022061193	0.19052527
WBGene00018337	389.2198716	-0.253542451	0.110769889	-2.288911303	0.022084506	0.19052527
WBGene00018409	545.0779067	0.228090633	0.099659685	2.288695099	0.022097074	0.19052527
WBGene00020345	105.0584557	-0.3849955	0.168039972	-2.29109476	0.021957934	0.19052527
WBGene00021000	482.8154733	-0.236331345	0.103149905	-2.291144567	0.021955054	0.19052527
WBGene00021246	2569.247323	-0.185250373	0.080940045	-2.288735725	0.022094712	0.19052527
WBGene00001511	1246.88999	0.215677915	0.09438996	2.284966681	0.022314782	0.190876351
WBGene00003826	585.0100656	0.275710806	0.120687744	2.284497141	0.02234233	0.190876351
WBGene00004884	929.8538539	0.169010359	0.074059978	2.282074111	0.022484965	0.190876351
WBGene00007679	2738.45117	-0.237182524	0.103851399	-2.283864514	0.022379495	0.190876351
WBGene00009993	1031.517966	0.325731939	0.14263442	2.283683974	0.022390111	0.190876351
WBGene00011122	824.0547829	0.24418992	0.10699585	2.282237302	0.022475334	0.190876351
WBGene00012730	2126.344317	0.224622068	0.098198962	2.287417953	0.022171439	0.190876351
WBGene00013442	293.978249	0.298769022	0.130646996	2.28684189	0.022205053	0.190876351
WBGene00014672	406.9189772	-0.220494125	0.096515148	-2.284554596	0.022338958	0.190876351
WBGene00015271	929.0584705	-0.245480193	0.107389172	-2.285893331	0.0222605	0.190876351
WBGene00015470	374.7481752	0.2324873	0.101833866	2.28300572	0.022430031	0.190876351
WBGene00015810	306.6236141	0.250477804	0.109768345	2.281876472	0.022496634	0.190876351
WBGene00206497	47358.53056	-0.229123818	0.100343882	-2.283386032	0.022407639	0.190876351
WBGene00004093	967.5935562	0.306527126	0.134381818	2.28101636	0.022547479	0.191073304
WBGene00000226	2037.409878	0.276255431	0.121232398	2.278726122	0.022683351	0.191163298
WBGene00008862	51122.05102	-0.220077627	0.096551834	-2.279372836	0.022644912	0.191163298
WBGene00009224	1632.779358	-0.23208357	0.101886964	-2.277853415	0.022735313	0.191163298
WBGene00009576	547.8191359	-0.265333405	0.116371246	-2.280059837	0.02260414	0.191163298
WBGene00012982	1297.18568	0.24653466	0.108244126	2.277580028	0.022751612	0.191163298
WBGene00013029	502.259843	-0.223708799	0.098206169	-2.277950581	0.022729522	0.191163298
WBGene00021673	21624.56494	-0.217101886	0.095264928	-2.278927727	0.022671362	0.191163298
WBGene00015104	492.9491656	0.292811082	0.128631322	2.276359101	0.022824525	0.191543196
WBGene00011964	30222.31763	-0.200406683	0.088074846	-2.27541339	0.022881143	0.191785579
WBGene00004824	528.963334	0.244391091	0.107461367	2.274222798	0.022952594	0.192147043
WBGene00012097	622.2343583	0.289159526	0.127171866	2.273769622	0.022979842	0.192147043
WBGene00004188	1110.543716	0.250468999	0.110188864	2.273088126	0.02302087	0.192257627
WBGene00011580	980.5444256	0.280279738	0.123342389	2.27237158	0.023064077	0.192386117
WBGene00000892	328.7633552	0.241541149	0.106397536	2.270176148	0.023196898	0.1932609
WBGene00007464	286.8859179	0.258413855	0.113966352	2.267457463	0.023362295	0.194404654
WBGene00015022	448.276123	-0.187398177	0.082705691	-2.265843798	0.023460949	0.194990938
WBGene00010042	420.3620862	0.265577362	0.117252148	2.265010634	0.023512027	0.195180872
WBGene00004075	1913.955096	0.254767874	0.112591829	2.262756328	0.023650714	0.195434671
WBGene00011058	518.533853	0.260973441	0.115361735	2.26221841	0.023683912	0.195434671
WBGene00015501	609.6601251	0.263951389	0.116677886	2.262222932	0.023683633	0.195434671
WBGene00021784	885.7433871	0.252193579	0.111464998	2.26253607	0.023664303	0.195434671
WBGene00270322	734.3640892	0.259781388	0.114823726	2.262436498	0.023670448	0.195434671
WBGene00003584	494.4311321	-0.191288009	0.084645896	-2.259861585	0.023829843	0.195994713
WBGene00009026	515.0527494	-0.269262756	0.119180087	-2.259293158	0.023865155	0.195994713
WBGene00009812	323.3587428	-0.302179195	0.133668516	-2.260660957	0.02378026	0.195994713
WBGene00010476	585.0074724	0.336957397	0.149130537	2.259479544	0.023853571	0.195994713
WBGene00007009	2335.506596	0.272180393	0.120497288	2.25880928	0.023895251	0.196009087
WBGene00012040	28443.22123	-0.19344631	0.085673408	-2.25795045	0.023948749	0.196215164
WBGene00000730	3181.238532	-0.192211426	0.085185429	-2.256388534	0.024046309	0.196548732
WBGene00020399	399.8121192	0.263132002	0.116596999	2.2567648	0.024022775	0.196548732
WBGene00002148	1081.43744	0.241893268	0.107234818	2.255734405	0.02408727	0.196651085
WBGene00004503	808.1710721	0.248037838	0.110061477	2.25362993	0.024219459	0.19745336
WBGene00015927	550.660804	0.245319416	0.10887302	2.2532618	0.024242647	0.19745336
WBGene00001898	27539.11647	-0.24923162	0.110686988	-2.251679486	0.024342534	0.197771534
WBGene00008418	517.1867538	0.21773935	0.096725012	2.25111733	0.024378107	0.197771534
WBGene00012732	348.19844	0.200476975	0.0890679	2.250833063	0.024396113	0.197771534
WBGene00017069	17272.19283	-0.182298313	0.080946015	-2.252097442	0.024316115	0.197771534
WBGene00021189	635.0837642	-0.373105607	0.165804707	-2.250271504	0.024431716	0.197828237
WBGene00000818	613.0058247	0.268590788	0.119412186	2.249274518	0.024495036	0.198107405
WBGene00020481	611.1097309	0.237490879	0.105606548	2.248827221	0.024523491	0.198107405
WBGene00008345	304.8376608	0.294104044	0.130853249	2.247586875	0.024602545	0.19851412
WBGene00007400	180.5998447	0.315491974	0.140420864	2.246759961	0.024655372	0.198708504
WBGene00022350	1018.185938	0.224073548	0.099785121	2.245560729	0.024732158	0.199095313
WBGene00001566	880.3150544	0.297484206	0.132691163	2.241929305	0.024965942	0.199122822
WBGene00016701	511.3926079	0.275749272	0.122936852	2.243015563	0.024895811	0.199122822
WBGene00017887	671.32482	-0.22120442	0.09864858	-2.242347748	0.024938906	0.199122822
WBGene00018418	8118.994386	-0.337508912	0.150358188	-2.24469925	0.024787446	0.199122822
WBGene00019822	752.6839617	0.248113742	0.110658881	2.24214938	0.024951719	0.199122822
WBGene00019899	989.8731388	-0.252281138	0.11251738	-2.242152615	0.02495151	0.199122822
WBGene00021324	122.4295069	0.320193578	0.142791717	2.24238201	0.024936693	0.199122822
WBGene00022488	454.3965881	0.235960992	0.105142478	2.244202315	0.024819387	0.199122822
WBGene00000885	307.1368778	0.271317787	0.121356783	2.235703528	0.025371198	0.199935318
WBGene00001131	1400.897504	-0.215892452	0.096673103	-2.233221489	0.025534342	0.199935318
WBGene00003950	258.4136866	0.250952929	0.112174653	2.237162521	0.02527572	0.199935318
WBGene00004466	576.9626155	0.308897785	0.13793029	2.239521029	0.025122035	0.199935318
WBGene00006516	770.3677979	0.290756026	0.130115168	2.234605159	0.025443282	0.199935318
WBGene00006943	2226.574532	0.288536478	0.129146084	2.23418681	0.025470784	0.199935318
WBGene00007092	1292.902519	0.264776389	0.118441667	2.235500365	0.025384518	0.199935318
WBGene00007258	2217.052494	0.286570814	0.128159854	2.236041989	0.025349021	0.199935318
WBGene00007329	758.4601199	0.189622252	0.084917446	2.233018778	0.025547706	0.199935318
WBGene00011242	181.2653859	0.255556759	0.114353155	2.234802863	0.025430294	0.199935318
WBGene00015206	892.7100542	-0.182635667	0.081826655	-2.231982548	0.025616116	0.199935318
WBGene00015283	735.5434563	0.322226026	0.144037813	2.237093293	0.025280243	0.199935318
WBGene00015745	335.1439094	0.214757187	0.096088972	2.23498266	0.025418487	0.199935318
WBGene00016457	292.8138913	-0.327878526	0.146618186	-2.236274604	0.025333789	0.199935318
WBGene00018635	404.2119485	0.237466868	0.106393553	2.231966693	0.025617164	0.199935318
WBGene00020652	3275.067871	0.306047669	0.137103872	2.232232142	0.025599624	0.199935318
WBGene00021830	508.6832819	0.283736509	0.126746118	2.238620899	0.025180593	0.199935318
WBGene00022738	892.5733786	0.224516127	0.100491167	2.234187677	0.025470727	0.199935318
WBGene00194682	185.2012547	-0.28578825	0.128028348	-2.232226331	0.025600008	0.199935318
WBGene00004045	10003.74829	-0.21416822	0.096006103	-2.230777138	0.025695895	0.19998484
WBGene00004302	828.2832563	0.186543192	0.083637539	2.230376389	0.025722466	0.19998484
WBGene00010317	587.8388034	0.234806696	0.105307329	2.229727969	0.025765508	0.19998484
WBGene00011205	337.9098692	-0.214345001	0.096124857	-2.229860293	0.025756719	0.19998484
WBGene00012206	247.3317037	0.305399895	0.136969742	2.229688774	0.025768112	0.19998484
WBGene00006460	755.6162938	0.256999644	0.115422316	2.226602728	0.025973837	0.20135547
WBGene00004946	944.1604423	0.247175199	0.111116898	2.224460941	0.026117448	0.201705254
WBGene00010941	949.0024412	0.290874166	0.130777545	2.224190443	0.026135634	0.201705254
WBGene00013006	416.9108483	0.264270995	0.118814506	2.224231747	0.026132856	0.201705254
WBGene00015204	337.3273211	0.26505773	0.119142972	2.224703025	0.026101181	0.201705254
WBGene00000081	6525.414155	-0.235758068	0.106089849	-2.222249068	0.026266478	0.201836412
WBGene00011011	144.9128988	0.336474444	0.151369636	2.222866169	0.026224826	0.201836412
WBGene00012676	674.6642889	0.31883885	0.143478524	2.222206089	0.026269381	0.201836412
WBGene00044894	132.0830521	0.309229454	0.139126892	2.222643289	0.026239863	0.201836412
WBGene00003924	411.0647768	0.288711348	0.12996594	2.221438535	0.026321273	0.202010662
WBGene00004373	682.5231392	0.296954837	0.133785131	2.219640059	0.026443211	0.202281104
WBGene00006994	3599.147529	0.284938586	0.128346352	2.220075464	0.026413645	0.202281104
WBGene00020778	2083.042282	-0.191238313	0.086157958	-2.219624486	0.026444269	0.202281104
WBGene00014667	3110.286248	0.265420112	0.119646012	2.218378255	0.026529052	0.202705412
WBGene00016582	854.9840534	0.24184999	0.109058153	2.217624114	0.026580472	0.202755015
WBGene00021868	502.2402532	0.290121791	0.130837357	2.217423192	0.026594186	0.202755015
WBGene00009176	161.4819336	0.352367735	0.158952379	2.216813216	0.026635858	0.202849073
WBGene00012961	22806.36212	-0.349694962	0.157791749	-2.216180277	0.026679158	0.202955311
WBGene00001558	1144.151474	0.242519059	0.10975775	2.209584839	0.027133988	0.203504913
WBGene00004051	1069.329583	0.240350918	0.108608122	2.21301053	0.02689692	0.203504913
WBGene00006382	1162.185928	0.258472005	0.116894474	2.211156752	0.027024984	0.203504913
WBGene00006391	663.7529928	0.258507203	0.116794237	2.213355809	0.026873125	0.203504913
WBGene00008183	1337.898752	0.255906998	0.115628496	2.213182792	0.026885046	0.203504913
WBGene00011143	266.7148767	0.236259002	0.106845763	2.211215455	0.027020921	0.203504913
WBGene00012490	1221.025452	-0.209516951	0.094739442	-2.211507124	0.027000739	0.203504913
WBGene00013347	413.0923995	0.230076757	0.103976598	2.212774437	0.026913201	0.203504913
WBGene00013354	373.9484739	0.319438322	0.144553985	2.209820242	0.02711764	0.203504913
WBGene00017643	672.6814201	0.301790375	0.136501586	2.210892812	0.027043261	0.203504913
WBGene00018672	212.7277366	-0.250869651	0.113399347	-2.212267151	0.026948211	0.203504913
WBGene00019943	700.4121007	0.252182304	0.114121883	2.209762908	0.027121621	0.203504913
WBGene00020935	1333.545093	0.307737445	0.139259822	2.209807828	0.027118502	0.203504913
WBGene00012978	1014.981348	0.277580934	0.125744698	2.207496133	0.027279417	0.20422002
WBGene00020259	474.3704088	0.231731718	0.104981037	2.207367404	0.027288402	0.20422002
WBGene00000804	850.0149408	0.306104209	0.138706911	2.206841801	0.027325114	0.204273687
WBGene00004510	1417.034987	0.30765684	0.139481352	2.205720227	0.027403595	0.204292111
WBGene00009508	302.9047866	0.259295518	0.117565535	2.205540228	0.027416208	0.204292111
WBGene00015601	1011.992823	-0.257323581	0.116653826	-2.205873479	0.02739286	0.204292111
WBGene00020450	2951.439417	-0.195744904	0.088775341	-2.204946803	0.027457828	0.204382001
WBGene00003827	1049.069802	0.259790486	0.11793005	2.202920179	0.027600375	0.20458601
WBGene00004164	1636.4884	-0.193341743	0.08776791	-2.202875098	0.027603553	0.20458601
WBGene00014615	343.1402948	-0.334476617	0.151836421	-2.202874736	0.027603579	0.20458601
WBGene00018925	98.15523054	0.332367548	0.15084346	2.203393815	0.027567004	0.20458601
WBGene00004882	397.4582153	0.279135578	0.126801938	2.201351034	0.027711183	0.204975675
WBGene00012524	1558.974475	0.203268426	0.092358128	2.200872086	0.027745081	0.204975675
WBGene00018772	5502.68871	-0.23489419	0.106718957	-2.201054025	0.027732199	0.204975675
WBGene00007912	240.0748554	0.266294738	0.121079002	2.199346983	0.027853259	0.2050982
WBGene00009770	1401.185709	0.213798752	0.097225384	2.199001375	0.027877825	0.2050982
WBGene00017273	722.6609764	0.269826169	0.122705903	2.198966495	0.027880305	0.2050982
WBGene00018468	3587.614663	-0.284893227	0.129519245	-2.199620817	0.027833809	0.2050982
WBGene00044742	583.6706274	-0.225963297	0.102798915	-2.198109752	0.027941286	0.205328365
WBGene00001047	636.2604714	0.22023908	0.100273867	2.19637565	0.028065067	0.20538061
WBGene00011267	4192.362744	-0.228661693	0.104149406	-2.195516064	0.0281266	0.20538061
WBGene00012347	223.8587733	0.257878491	0.117442755	2.195780336	0.02810767	0.20538061
WBGene00019402	406.8905356	0.323336461	0.147217565	2.196317134	0.028069252	0.20538061
WBGene00021976	1599.053376	-0.207507917	0.094442517	-2.197187497	0.028007058	0.20538061
WBGene00022759	276.8294519	0.291367801	0.132696112	2.195752366	0.028109673	0.20538061
WBGene00001085	1809.455295	0.289401926	0.132080095	2.191109317	0.028443883	0.205472565
WBGene00001527	537.5310445	0.188397176	0.086016376	2.190247764	0.028506273	0.205472565
WBGene00007235	345.0413278	0.264891105	0.120844805	2.191994137	0.02837993	0.205472565
WBGene00011502	626.4938625	0.317459272	0.144735434	2.193376306	0.028280278	0.205472565
WBGene00012104	391.8717027	0.302131785	0.137956714	2.190047703	0.028520777	0.205472565
WBGene00013673	10272.32512	-0.207915756	0.094943612	-2.189886736	0.028532452	0.205472565
WBGene00013994	642.1118133	0.274575027	0.125337074	2.19069282	0.028474029	0.205472565
WBGene00014061	604.9846302	-0.230244845	0.104977077	-2.193286862	0.028286718	0.205472565
WBGene00014176	657.71419	0.238090889	0.108607231	2.192219489	0.028363662	0.205472565
WBGene00017419	623.9754613	-0.312840868	0.142824219	-2.190390898	0.0284959	0.205472565
WBGene00018967	2302.897634	0.285889394	0.130284332	2.194349775	0.028210274	0.205472565
WBGene00019511	2972.242384	-0.207417446	0.094632492	-2.191820614	0.028392462	0.205472565
WBGene00020392	2824.145392	0.270448645	0.123516592	2.189573407	0.028555189	0.205472565
WBGene00021097	1737.439431	0.248669694	0.113536981	2.190208787	0.028509098	0.205472565
WBGene00021470	2024.837002	0.250251716	0.114387314	2.187757596	0.028687264	0.206208349
WBGene00005007	532.4550923	0.249669863	0.114218729	2.185892504	0.028823471	0.206613987
WBGene00012990	1134.44641	-0.14622584	0.066911871	-2.185349752	0.028863212	0.206613987
WBGene00018613	446.1855182	0.271422086	0.124168158	2.18592344	0.028821207	0.206613987
WBGene00020666	10849.91481	-0.213377654	0.097626943	-2.185643105	0.028841726	0.206613987
WBGene00006817	4274.580358	0.282281476	0.1291965	2.18490034	0.028896155	0.206635893
WBGene00002225	8105.069354	0.239419827	0.109689885	2.182697401	0.029058101	0.206780241
WBGene00010492	136.0057963	0.322307757	0.147672002	2.182592183	0.029065856	0.206780241
WBGene00013380	1786.08342	0.31044218	0.142186993	2.183337405	0.029010972	0.206780241
WBGene00016435	763.6247672	-0.263015278	0.120476643	-2.183122562	0.029026785	0.206780241
WBGene00022302	17503.12836	-0.202968437	0.092961214	-2.183366886	0.029008803	0.206780241
WBGene00013689	1252.804111	0.278878305	0.127840184	2.181460455	0.029149376	0.207161292
WBGene00003164	415.6893316	0.259529537	0.118994652	2.181018494	0.029182049	0.207180561
WBGene00003804	440.2930167	0.23243383	0.10664082	2.179595303	0.029287473	0.207584142
WBGene00007757	277.9974648	0.258875393	0.118780646	2.179440866	0.029298933	0.207584142
WBGene00018678	648.9372506	0.262098866	0.120306241	2.178597425	0.029361588	0.207815126
WBGene00002264	392.5316558	-0.216399939	0.099357968	-2.177982737	0.029407322	0.207926003
WBGene00004723	326.6120039	0.222683421	0.102280955	2.177173864	0.029467598	0.208139364
WBGene00012412	1065.313074	-0.245452255	0.112813963	-2.175725847	0.029575766	0.208690229
WBGene00000146	628.8255565	0.248472178	0.114288178	2.174084688	0.029698776	0.208706335
WBGene00002228	7140.071037	0.267248443	0.122877377	2.174919827	0.029636125	0.208706335
WBGene00006379	1097.137473	0.266888142	0.122755027	2.174152441	0.029693689	0.208706335
WBGene00021783	282.0832001	0.235828178	0.108460731	2.174318545	0.029681221	0.208706335
WBGene00017274	502.7387411	0.217963994	0.100288302	2.173374052	0.029752176	0.208869338
WBGene00006565	2431.742307	0.252824468	0.116396561	2.172095692	0.029848446	0.208930904
WBGene00009673	133.0096232	0.260755693	0.120072417	2.171653578	0.029881802	0.208930904
WBGene00010713	1250.689555	0.25844687	0.118992746	2.171954828	0.02985907	0.208930904
WBGene00013383	228.114282	0.349195142	0.160792993	2.171706213	0.02987783	0.208930904
WBGene00000275	3331.617056	0.307593512	0.141891392	2.167809535	0.030173181	0.209045597
WBGene00001086	173.4593869	0.312484479	0.144088185	2.168703005	0.030105239	0.209045597
WBGene00001092	690.2511603	0.289950056	0.133651107	2.16945496	0.03004816	0.209045597
WBGene00003228	717.2043336	0.289674524	0.133720937	2.166261554	0.030291206	0.209045597
WBGene00003372	114.6301328	0.307758157	0.141947792	2.168108097	0.030150463	0.209045597
WBGene00006700	401.7189329	0.237061828	0.109236421	2.170172054	0.029993814	0.209045597
WBGene00007059	119.830348	0.33575384	0.15487241	2.167938366	0.030163376	0.209045597
WBGene00010500	385.3937775	0.254622316	0.117535058	2.166352071	0.030284294	0.209045597
WBGene00011528	211.7656984	0.274087328	0.126250868	2.170973801	0.029933153	0.209045597
WBGene00012851	1639.132463	-0.198575838	0.0915313	-2.169485614	0.030045835	0.209045597
WBGene00019250	302.2545813	-0.271014376	0.125007058	-2.167992593	0.03015925	0.209045597
WBGene00019334	476.1948164	0.271778366	0.125395627	2.167367173	0.030206868	0.209045597
WBGene00021483	7518.121221	-0.207634594	0.09582589	-2.166790143	0.030250859	0.209045597
WBGene00002994	4479.827886	0.271588061	0.125581855	2.162637764	0.030569051	0.209677839
WBGene00003654	177.0812184	-0.264594288	0.122409133	-2.161556743	0.030652359	0.209677839
WBGene00007860	222.0669953	0.221782766	0.102651651	2.160537744	0.030731065	0.209677839
WBGene00010711	4320.676889	-0.224050388	0.103543859	-2.163821099	0.030478082	0.209677839
WBGene00010726	1990.454454	-0.216773012	0.100308772	-2.161057371	0.030690908	0.209677839
WBGene00012936	1725.291112	0.269923249	0.124813885	2.162605941	0.030571501	0.209677839
WBGene00013019	705.1572425	0.207932264	0.096225536	2.160884451	0.030704266	0.209677839
WBGene00013405	407.2736977	0.237400677	0.109877429	2.160595493	0.0307266	0.209677839
WBGene00013507	71361.10375	-0.190537346	0.088154804	-2.161394923	0.030664846	0.209677839
WBGene00017699	570.6265832	0.22235537	0.102758619	2.163861014	0.030475018	0.209677839
WBGene00021912	158.9302212	0.337548147	0.156248001	2.160335776	0.030746685	0.209677839
WBGene00044705	1133.513562	-0.230142632	0.106472262	-2.161526651	0.030654681	0.209677839
WBGene00000271	930.9707311	0.241007991	0.111633273	2.158926143	0.030855897	0.2102153
WBGene00000109	1220.950804	0.278135845	0.12893797	2.157129082	0.030995608	0.210425134
WBGene00007675	1745.002524	-0.228541487	0.105915609	-2.157769649	0.030945746	0.210425134
WBGene00021867	166.9586433	-0.313316919	0.145258253	-2.15696466	0.031008418	0.210425134
WBGene00022273	128.6320279	0.276112252	0.127984683	2.157385121	0.03097567	0.210425134
WBGene00004915	306.2439281	0.217732197	0.101008067	2.155592154	0.031115526	0.210514574
WBGene00013676	607.4727746	0.193755521	0.089916141	2.154846936	0.031173814	0.210514574
WBGene00018934	256.2805207	0.241226275	0.111909722	2.155543517	0.031119327	0.210514574
WBGene00020313	2205.939998	-0.217346634	0.100863339	-2.154862574	0.03117259	0.210514574
WBGene00022270	418.0772248	-0.26954642	0.1250823	-2.154952542	0.031165548	0.210514574
WBGene00015014	3561.006684	-0.216356031	0.100443743	-2.15400208	0.031240009	0.210585246
WBGene00015698	2794.643584	0.322701794	0.149819579	2.153936064	0.031245186	0.210585246
WBGene00235353	10551.91898	-0.213495223	0.099138514	-2.153504378	0.03127906	0.210608279
WBGene00011828	191.1926431	0.26219941	0.121777047	2.153110262	0.031310014	0.210611621
WBGene00022399	761.2319142	0.257304424	0.119535854	2.15252927	0.031355693	0.210713911
WBGene00195344	11638.8807	-0.208565605	0.096919268	-2.151951913	0.031401142	0.210814462
WBGene00219660	876.8798637	-0.269489024	0.125258842	-2.151457103	0.031440138	0.210871538
WBGene00001110	2574.034116	0.290789664	0.135547591	2.145295693	0.031929213	0.210879184
WBGene00001829	5204.380294	0.320150834	0.149168051	2.146242665	0.031853623	0.210879184
WBGene00001864	207.4117939	0.260741594	0.121360854	2.148481859	0.031675496	0.210879184
WBGene00003401	548.977484	0.283559884	0.131977889	2.148540845	0.031670815	0.210879184
WBGene00007287	188.4968331	0.331801422	0.154652858	2.145459365	0.031916137	0.210879184
WBGene00007976	356.3095327	-0.218765474	0.101732192	-2.150405587	0.031523147	0.210879184
WBGene00009478	283.1595061	0.258313419	0.120338232	2.146561526	0.031828206	0.210879184
WBGene00010615	202.6461858	0.266903275	0.124093831	2.15081823	0.03149055	0.210879184
WBGene00010942	203.6719937	0.278334992	0.129465915	2.149870806	0.031565435	0.210879184
WBGene00011270	1130.097486	0.264335626	0.12311764	2.14701667	0.031791955	0.210879184
WBGene00014115	561.2520751	0.273930373	0.127626956	2.146336331	0.031846155	0.210879184
WBGene00018995	259.636455	0.212304532	0.098764857	2.149595913	0.031587192	0.210879184
WBGene00020183	1359.884409	-0.238303646	0.111050493	-2.145903532	0.031880676	0.210879184
WBGene00021101	3809.109881	-0.230150104	0.107242908	-2.146063627	0.031867903	0.210879184
WBGene00021112	1406.920268	-0.157131523	0.073192137	-2.146836106	0.031806332	0.210879184
WBGene00022731	207.8300234	-0.272558432	0.126815365	-2.149254018	0.031614269	0.210879184
WBGene00003160	2113.730073	0.302683292	0.141189839	2.143803654	0.032048622	0.211264275
WBGene00012192	855.7720116	0.222698632	0.103863263	2.144152093	0.032020702	0.211264275
WBGene00001833	2940.048372	0.269496341	0.125795397	2.142338652	0.032166241	0.211434937
WBGene00018482	1130.226926	0.295945958	0.138129333	2.142527956	0.032151022	0.211434937
WBGene00021058	891.032711	0.278918924	0.130180719	2.142551731	0.032149111	0.211434937
WBGene00001909	1519.243521	-0.227094575	0.106095753	-2.140468105	0.032316956	0.212223883
WBGene00000567	705.0626251	0.242594455	0.11346985	2.13796401	0.032519664	0.212696353
WBGene00002083	936.1827388	0.212653288	0.099483104	2.137581961	0.032550687	0.212696353
WBGene00006499	1316.550832	0.209543066	0.098046915	2.13717142	0.032584052	0.212696353
WBGene00006647	1669.444572	0.217274544	0.101613968	2.138235009	0.032497674	0.212696353
WBGene00010502	725.9492158	0.207562359	0.097079455	2.138066784	0.032511323	0.212696353
WBGene00013127	101.8278601	0.292336416	0.136697329	2.138567143	0.032470741	0.212696353
WBGene00044063	412.8800194	0.282476328	0.13218832	2.136923513	0.032604213	0.212696353
WBGene00021561	198.3068265	0.255555511	0.119653164	2.135802378	0.032695525	0.213091006
WBGene00001995	416.9140994	-0.224666151	0.105259572	-2.134401148	0.032809958	0.213434485
WBGene00020030	744.8341197	0.289054071	0.135402495	2.134776545	0.032779267	0.213434485
WBGene00012341	998.3559779	0.238171195	0.111691954	2.132393487	0.032974512	0.214303339
WBGene00021605	608.120764	-0.338997588	0.159042672	-2.13148825	0.033048939	0.214585367
WBGene00008710	1777.667181	0.286586617	0.134563953	2.129742855	0.033192849	0.215258074
WBGene00022257	2328.591883	0.304957453	0.143207666	2.129477151	0.033214803	0.215258074
WBGene00011687	200.3556725	0.255046986	0.119833772	2.128339794	0.033308921	0.215665907
WBGene00000155	1084.77105	0.252812826	0.11907087	2.123213055	0.033736002	0.216012199
WBGene00001060	750.5014831	0.240437264	0.113367807	2.120860141	0.033933574	0.216012199
WBGene00003196	733.2795008	0.216710578	0.102193307	2.120594627	0.033955931	0.216012199
WBGene00004271	465.1686385	0.228759065	0.10784314	2.121220377	0.033903261	0.216012199
WBGene00005010	1246.70502	0.194716097	0.091807285	2.120922059	0.033928362	0.216012199
WBGene00007122	264.08473	-0.223729584	0.1054223	-2.122222566	0.033819052	0.216012199
WBGene00007534	704.4746088	0.234719775	0.110657355	2.121140294	0.033909998	0.216012199
WBGene00008086	13250.17178	-0.200293014	0.094377553	-2.122252675	0.033816525	0.216012199
WBGene00008348	229.9100341	-0.28195166	0.132709909	-2.124571275	0.033622403	0.216012199
WBGene00009247	51553.50145	-0.196597554	0.092630046	-2.122395083	0.033804575	0.216012199
WBGene00010067	542.8362234	-0.280267305	0.1319925	-2.123357805	0.03372388	0.216012199
WBGene00010919	18534.26262	-0.20093998	0.094548015	-2.125269161	0.03356416	0.216012199
WBGene00012867	525.8189433	-0.189226698	0.089016788	-2.1257417	0.033524773	0.216012199
WBGene00015920	604.6249912	0.240685506	0.113287176	2.12456092	0.033623268	0.216012199
WBGene00018622	343.5864347	-0.246038714	0.115809628	-2.124510008	0.03362752	0.216012199
WBGene00019816	4835.251127	-0.212854255	0.100326316	-2.121619372	0.033869714	0.216012199
WBGene00021219	935.3274498	-0.237048209	0.111499083	-2.126010388	0.033502395	0.216012199
WBGene00021613	1081.6789	0.301325019	0.141878549	2.12382366	0.033684892	0.216012199
WBGene00022681	212.5332604	0.266936322	0.12556357	2.125905796	0.033511104	0.216012199
WBGene00021034	2479.535842	-0.182056443	0.085921387	-2.118872259	0.034101264	0.216538329
WBGene00021977	474.1810761	-0.242625206	0.114499393	-2.119008667	0.034089735	0.216538329
WBGene00000204	599.0516652	0.185672263	0.088016909	2.109506742	0.034900865	0.216666904
WBGene00000426	256.0570541	0.215561664	0.101874474	2.115953639	0.034348751	0.216666904
WBGene00000877	188.8343277	0.292173573	0.138269639	2.113071063	0.034594686	0.216666904
WBGene00001840	1715.656074	0.233100979	0.11018156	2.115607906	0.034378169	0.216666904
WBGene00002229	6836.452719	0.290700443	0.137548082	2.113445995	0.034562613	0.216666904
WBGene00003161	188.2657951	0.253903222	0.119937106	2.116969715	0.034262418	0.216666904
WBGene00003221	356.7906653	0.238480803	0.112602669	2.117896543	0.03418383	0.216666904
WBGene00003791	787.3802443	0.241289908	0.114278672	2.111416789	0.034736503	0.216666904
WBGene00003818	1087.321073	0.230899559	0.109353816	2.111490633	0.034730162	0.216666904
WBGene00004242	687.317175	0.233373435	0.110635955	2.109381474	0.034911667	0.216666904
WBGene00004754	625.3251501	0.212285568	0.100453013	2.11328224	0.034576618	0.216666904
WBGene00004800	892.0801513	0.260324728	0.123349489	2.110464582	0.034818359	0.216666904
WBGene00006974	3040.45271	0.270639294	0.128323236	2.109043554	0.034940822	0.216666904
WBGene00007042	1545.057935	0.26664383	0.12621702	2.112582199	0.034636544	0.216666904
WBGene00009221	1461.354888	-0.212657762	0.100863496	-2.108371899	0.034998833	0.216666904
WBGene00010676	779.120159	0.270015951	0.128016101	2.109234293	0.034924363	0.216666904
WBGene00013031	470.4335118	-0.236183183	0.111839377	-2.111807035	0.034703004	0.216666904
WBGene00014098	263.8740828	0.213523051	0.101033777	2.113382841	0.034568013	0.216666904
WBGene00016120	538.0963778	0.19623015	0.092999292	2.110017681	0.034856833	0.216666904
WBGene00018586	690.4099932	0.218871133	0.103413509	2.116465579	0.03430523	0.216666904
WBGene00019070	13418.94217	-0.207558768	0.098185244	-2.113950743	0.034519475	0.216666904
WBGene00020628	844.9222459	0.182788764	0.086640063	2.109748733	0.034880004	0.216666904
WBGene00021636	363.8534392	0.261796589	0.124097919	2.10959693	0.034893089	0.216666904
WBGene00044219	225.1759224	-0.257566183	0.122153536	-2.108544637	0.034983906	0.216666904
WBGene00044268	4750.876685	-0.181854628	0.085919768	-2.116563304	0.034296927	0.216666904
WBGene00044326	250.3939879	0.260409736	0.12299025	2.117320158	0.034232685	0.216666904
WBGene00220258	512.6188697	-0.260659371	0.123561105	-2.109558439	0.034896407	0.216666904
WBGene00255596	158.5425472	0.258634415	0.12225599	2.115515288	0.034386053	0.216666904
WBGene00009103	843.4143974	0.228832022	0.108555598	2.107970709	0.035033523	0.216687668
WBGene00008852	331.3173555	0.210995681	0.100161334	2.106558214	0.035155892	0.217250218
WBGene00007101	837.8423086	0.300800698	0.142845212	2.105780754	0.035223401	0.217279055
WBGene00019276	497.9152197	0.200628543	0.095274824	2.105787604	0.035222806	0.217279055
WBGene00006697	707.6567044	0.172454561	0.081913051	2.105336809	0.035262	0.21732329
WBGene00004088	314.4956619	0.22955315	0.109167522	2.102760481	0.035486712	0.217556339
WBGene00008219	343.3747701	0.287491033	0.136703663	2.103023632	0.035463704	0.217556339
WBGene00014027	1004.49287	-0.183547359	0.087253846	-2.103601932	0.035413185	0.217556339
WBGene00019259	1061.290746	0.2658042	0.126391086	2.103029633	0.035463179	0.217556339
WBGene00020397	140.224767	-0.32249576	0.153300474	-2.103684035	0.035406018	0.217556339
WBGene00021416	1848.395145	-0.218619333	0.103968835	-2.102739092	0.035488583	0.217556339
WBGene00002000	935.6953106	0.243464084	0.115902339	2.100596819	0.035676374	0.21770821
WBGene00006894	122.1408811	-0.257447762	0.122558649	-2.10060869	0.035675331	0.21770821
WBGene00007023	659.128216	0.233325651	0.1111104	2.099944303	0.035733741	0.21770821
WBGene00012000	762.2079444	0.214870598	0.102288933	2.100624103	0.035673976	0.21770821
WBGene00017980	111.0619102	-0.294675586	0.140182028	-2.102092467	0.035545177	0.21770821
WBGene00020296	452.5487503	0.224525199	0.106906735	2.100196946	0.03571152	0.21770821
WBGene00199722	218.3965406	-0.332016281	0.158028408	-2.100991112	0.035641747	0.21770821
WBGene00006957	670.0405878	0.211823151	0.100904603	2.09924171	0.035795599	0.217893104
WBGene00003777	1758.852617	0.219957683	0.10481609	2.098510659	0.035860059	0.217901855
WBGene00019103	97.78321283	-0.289691079	0.138033669	-2.098698674	0.035843472	0.217901855
WBGene00001600	999.213032	0.238051409	0.113529431	2.096825519	0.036009024	0.218150103
WBGene00002201	1137.428759	0.212947778	0.101702634	2.09382756	0.036275344	0.218150103
WBGene00003406	1078.745719	0.21976147	0.104873952	2.095481906	0.036128175	0.218150103
WBGene00004179	1746.590705	0.269306835	0.128643989	2.093427279	0.036311029	0.218150103
WBGene00006577	559.7764899	0.203890878	0.097216949	2.097277058	0.035969057	0.218150103
WBGene00007493	566.6026776	0.242512896	0.115619551	2.097507683	0.035948658	0.218150103
WBGene00008157	112.710328	-0.309984824	0.147929012	-2.095497161	0.036126821	0.218150103
WBGene00010303	885.9433179	0.252907902	0.120759862	2.094304337	0.036232878	0.218150103
WBGene00012216	129.5306907	-0.292982582	0.139755211	-2.096398273	0.036046875	0.218150103
WBGene00013406	244.5498388	0.241598963	0.115402205	2.093538542	0.036301107	0.218150103
WBGene00016195	540.8284354	0.204628091	0.097665578	2.095191532	0.03615397	0.218150103
WBGene00018975	1731.838865	0.258340332	0.123353177	2.094314379	0.036231984	0.218150103
WBGene00043057	156.4168964	0.259393557	0.123895311	2.093651133	0.036291069	0.218150103
WBGene00003478	564.688845	0.169718496	0.08112819	2.091979309	0.036440367	0.218456207
WBGene00015702	341.604418	0.237206652	0.113398551	2.091796145	0.036456755	0.218456207
WBGene00022497	137.7226174	0.314337316	0.150246229	2.092147788	0.036425297	0.218456207
WBGene00004015	764.6889476	0.235876106	0.112830917	2.090527238	0.036570464	0.218758443
WBGene00271642	167.9802461	-0.250999845	0.120057655	-2.09066089	0.036558473	0.218758443
WBGene00013687	286.7945907	0.265126314	0.126865628	2.089819901	0.036633981	0.218948987
WBGene00000875	2083.036674	0.245904119	0.117740455	2.088527006	0.036750322	0.219265294
WBGene00010279	1891.878761	0.25788908	0.123473136	2.088625015	0.036741492	0.219265294
WBGene00012999	2848.543247	0.245866747	0.117743679	2.088152411	0.036784088	0.219277562
WBGene00000517	919.2831541	0.223541368	0.107218367	2.08491673	0.03707686	0.219404769
WBGene00002035	639.9229967	0.17847131	0.085595463	2.085055714	0.037064244	0.219404769
WBGene00009441	392.4279721	0.286311873	0.13725269	2.086020124	0.0369768	0.219404769
WBGene00009772	553.4093679	0.216907654	0.1040618	2.084411906	0.037122716	0.219404769
WBGene00010875	353.2420735	0.255419082	0.12236246	2.0873974	0.036852227	0.219404769
WBGene00018851	9324.12298	-0.200183463	0.095928419	-2.086800403	0.036906181	0.219404769
WBGene00019541	19068.04796	-0.202391111	0.097083004	-2.084722389	0.037094507	0.219404769
WBGene00022063	1577.235489	-0.214883734	0.103009398	-2.086059513	0.036973233	0.219404769
WBGene00022124	226.7853702	0.274349415	0.131458516	2.086965717	0.036891234	0.219404769
WBGene00023172	2255.242865	-0.196180844	0.094065765	-2.085571133	0.037017488	0.219404769
WBGene00007109	1073.712891	0.236364216	0.113462438	2.083193528	0.037233587	0.21987212
WBGene00008006	1111.826015	0.264757616	0.127210904	2.081249383	0.037411086	0.220731789
WBGene00044503	1158.346562	-0.277687081	0.13345401	-2.080769858	0.037454976	0.220802354
WBGene00004042	3088.678067	0.244220187	0.117468473	2.07902752	0.037614821	0.221555782
WBGene00012831	1063.391115	-0.207656677	0.099967595	-2.077239903	0.037779423	0.221881512
WBGene00014820	201.8125184	-0.245668044	0.118257547	-2.077398438	0.0377648	0.221881512
WBGene00022583	433.1775081	-0.177430205	0.085424817	-2.07703347	0.03779847	0.221881512
WBGene00198024	130.6893079	-0.349024451	0.168038226	-2.077053891	0.037796586	0.221881512
WBGene00017046	122.4542784	0.309787049	0.149175889	2.076656294	0.037833293	0.221897559
WBGene00007395	218.4018856	-0.255296051	0.122984227	-2.075843842	0.037908396	0.222149626
WBGene00018625	1249.149706	0.265946602	0.128143082	2.075387897	0.037950599	0.22220863
WBGene00004167	2047.226879	0.280871318	0.135367279	2.074883386	0.037997344	0.222294105
WBGene00014106	278.5567813	-0.27872436	0.134368293	-2.074331328	0.03804855	0.222405515
WBGene00020348	351.2158318	0.258468144	0.12464099	2.073700994	0.038107089	0.22255956
WBGene00011914	307.0767971	0.255638593	0.123302764	2.073259224	0.038148161	0.222611423
WBGene00001049	1588.641497	0.221060101	0.10666051	2.072558076	0.038213426	0.222804251
WBGene00013370	601.1190257	-0.231781821	0.111891889	-2.071480094	0.038313953	0.223202177
WBGene00000530	245.1143314	0.303979032	0.146805844	2.070619427	0.038394375	0.223482412
WBGene00001336	547.2498434	0.260175203	0.12576578	2.068728098	0.038571609	0.22394851
WBGene00004506	325.40649	0.243376917	0.117614295	2.069280075	0.038519812	0.22394851
WBGene00011885	891.5540832	0.229636018	0.110988073	2.069015262	0.038544655	0.22394851
WBGene00003799	1394.560377	0.214404518	0.103722572	2.067096041	0.038725105	0.224145168
WBGene00013808	792.5085233	0.185183778	0.089591056	2.066989563	0.038735137	0.224145168
WBGene00017298	174.5796845	0.327305585	0.158348149	2.066999748	0.038734178	0.224145168
WBGene00023405	260.7754255	0.321072766	0.155327419	2.067070762	0.038727487	0.224145168
WBGene00001688	3262.048369	0.300243197	0.14533242	2.065906541	0.038837305	0.224548466
WBGene00019638	5982.75254	-0.187106187	0.090585326	-2.065524241	0.038873424	0.224569531
WBGene00017830	389.2416428	0.223092791	0.108078318	2.064177126	0.039000925	0.225044885
WBGene00019196	269.12518	0.197123176	0.095506918	2.063967502	0.039020798	0.225044885
WBGene00002245	1044.889455	0.203207453	0.098548942	2.061995279	0.039208185	0.225937168
WBGene00022306	414.2996175	0.19845576	0.096270755	2.061433515	0.0392617	0.226057166
WBGene00018391	134.4502788	0.265431017	0.12878592	2.061025122	0.039300643	0.226093136
WBGene00017169	143.2454791	0.26640525	0.129294482	2.060453365	0.03935522	0.226218907
WBGene00003036	523.3693232	0.265444634	0.128916897	2.059036787	0.039490715	0.226620989
WBGene00006392	577.4438048	0.239685368	0.11640154	2.059125395	0.039482228	0.226620989
WBGene00007696	318.4978264	0.224299296	0.108969658	2.058364686	0.039555139	0.226802476
WBGene00004043	1909.87117	0.232802191	0.113181756	2.056887959	0.039697005	0.227239061
WBGene00021607	6322.405676	-0.345697127	0.168040608	-2.057223727	0.03966471	0.227239061
WBGene00001365	472.57557	0.229843055	0.111960972	2.052885494	0.040083684	0.227371402
WBGene00001509	1233.082457	0.239409722	0.116703078	2.051443093	0.040223816	0.227371402
WBGene00003796	3059.257228	0.252764173	0.123057625	2.054030961	0.039972695	0.227371402
WBGene00003914	3256.426449	0.228818674	0.11151639	2.051883806	0.040180956	0.227371402
WBGene00004504	898.5583984	0.289995448	0.141228037	2.0533844	0.040035311	0.227371402
WBGene00008459	135.5644446	0.270035575	0.131715122	2.050148612	0.040349931	0.227371402
WBGene00009131	350.8363887	0.236765948	0.115428347	2.051194132	0.040248045	0.227371402
WBGene00009364	398.1142589	0.229628811	0.111978741	2.050646475	0.040301387	0.227371402
WBGene00011239	461.7623518	0.232874319	0.113458701	2.052502952	0.040120808	0.227371402
WBGene00011531	2574.87486	-0.167088325	0.081511923	-2.049863618	0.040377741	0.227371402
WBGene00011662	534.454193	0.259060569	0.126359786	2.050182077	0.040346666	0.227371402
WBGene00011980	1769.15213	0.233013868	0.113379364	2.055170004	0.039862587	0.227371402
WBGene00014130	16606.81102	-0.184111689	0.089595909	-2.054911798	0.039887525	0.227371402
WBGene00015312	713.3839214	0.296636389	0.144400785	2.05425745	0.039950781	0.227371402
WBGene00016405	2590.24953	0.236278012	0.115185712	2.051278818	0.040239802	0.227371402
WBGene00019466	519.1883904	-0.188280184	0.091698021	-2.053263323	0.040047046	0.227371402
WBGene00021170	361.5227604	0.262905536	0.127862457	2.056158962	0.039767196	0.227371402
WBGene00021844	163.6045115	0.246383587	0.12019419	2.049879351	0.040376206	0.227371402
WBGene00044281	1683.558793	-0.183343989	0.089361654	-2.05170766	0.040198082	0.227371402
WBGene00219207	20314.28345	-0.188681935	0.091936783	-2.05230081	0.040140437	0.227371402
WBGene00006497	1821.056188	0.25566421	0.124773107	2.049032977	0.04045889	0.227457908
WBGene00019735	17190.74826	-0.192206487	0.093803152	-2.049040804	0.040458125	0.227457908
WBGene00019569	620.6920774	-0.228125754	0.111389515	-2.048000239	0.040559976	0.22784097
WBGene00004138	543.80598	0.17370861	0.084876967	2.046593031	0.04069806	0.227936121
WBGene00012369	486.0009786	0.180875634	0.088369379	2.046813456	0.040676404	0.227936121
WBGene00012373	7305.999301	-0.207870879	0.101574636	-2.046484104	0.040708765	0.227936121
WBGene00016313	645.8665404	0.211771458	0.103473609	2.046622902	0.040695124	0.227936121
WBGene00021374	490.1335252	-0.229933329	0.112378252	-2.046066077	0.04074987	0.227981676
WBGene00007859	228.6108505	0.232410391	0.113630787	2.045311806	0.040824127	0.228212483
WBGene00003132	1097.979718	0.287284219	0.140571871	2.043682117	0.040984961	0.228741732
WBGene00004028	471.1244264	0.249662518	0.122147559	2.04394193	0.040959284	0.228741732
WBGene00002230	1209.881252	-0.219840457	0.107651965	-2.042140676	0.041137579	0.229014533
WBGene00003133	2565.411406	0.234797335	0.115130135	2.03940814	0.041409311	0.229014533
WBGene00003247	137.6658423	0.332974291	0.163452784	2.037128296	0.041637187	0.229014533
WBGene00004217	1002.956161	0.262382543	0.128792486	2.037250391	0.041624956	0.229014533
WBGene00005006	719.9578425	0.294743396	0.144615472	2.038117999	0.041538133	0.229014533
WBGene00006445	224.6448803	-0.225456144	0.110643535	-2.037680225	0.041581923	0.229014533
WBGene00009078	131.727848	0.245074319	0.120033128	2.041722345	0.041179081	0.229014533
WBGene00009511	65036.94812	-0.194333919	0.095312102	-2.038921757	0.041457837	0.229014533
WBGene00011814	174.946159	0.259474328	0.127200669	2.039881786	0.041362101	0.229014533
WBGene00012472	741.0183396	0.250321424	0.122637893	2.041142568	0.041236658	0.229014533
WBGene00014947	218.9857975	-0.206127215	0.101190964	-2.037012076	0.041648832	0.229014533
WBGene00016469	170.902353	-0.257741118	0.126537479	-2.036875723	0.041662497	0.229014533
WBGene00017928	669.4542599	0.274662712	0.134579822	2.040890733	0.041261689	0.229014533
WBGene00019429	486.8332636	0.281763732	0.138147211	2.039590457	0.041391133	0.229014533
WBGene00019767	992.0328662	0.151278728	0.074270201	2.03686979	0.041663092	0.229014533
WBGene00020092	942.1245048	0.242620703	0.119068387	2.037658433	0.041584104	0.229014533
WBGene00022272	2713.125709	-0.201522575	0.098733771	-2.041070368	0.041243833	0.229014533
WBGene00022438	6098.775173	-0.168950669	0.082736349	-2.042036779	0.041147883	0.229014533
WBGene00044907	22539.09634	-0.180980049	0.088849594	-2.036926014	0.041657457	0.229014533
WBGene00044258	12553.55895	-0.199059451	0.09779143	-2.03555108	0.041795454	0.229559624
WBGene00008422	5616.247262	0.161614658	0.079434252	2.034571419	0.041894016	0.229660288
WBGene00018094	167.9278414	-0.242418964	0.119147953	-2.034604521	0.041890682	0.229660288
WBGene00022286	2319.740002	0.259893484	0.127750783	2.0343788	0.041913418	0.229660288
WBGene00001831	4313.344041	0.293237962	0.144188271	2.033715782	0.04198026	0.229662577
WBGene00016261	236.50684	0.219536834	0.107933562	2.033999709	0.041951625	0.229662577
WBGene00017729	19328.77707	-0.196669656	0.096741739	-2.032934887	0.042059102	0.229912007
WBGene00009456	396.279574	0.221097595	0.108788453	2.032362712	0.04211695	0.229983367
WBGene00012678	438.5627192	0.282398638	0.138988054	2.031819504	0.042171932	0.229983367
WBGene00015184	623.9570028	-0.225865393	0.111160059	-2.031893431	0.042164446	0.229983367
WBGene00003923	360.118124	0.185787446	0.091500578	2.030451056	0.042310711	0.230014599
WBGene00011791	714.5215184	-0.247652467	0.121950253	-2.030766327	0.042278704	0.230014599
WBGene00012701	269.6526329	0.195571715	0.096291973	2.031028237	0.04225213	0.230014599
WBGene00015143	2299.248931	0.243879804	0.120094209	2.030737413	0.042281639	0.230014599
WBGene00016617	201.3521107	0.27596246	0.135938659	2.03005137	0.042351318	0.230054488
WBGene00001998	621.4052191	0.173838654	0.085668832	2.02919369	0.042438566	0.230347476
WBGene00015023	544.6712778	0.26324176	0.129764965	2.028604255	0.042498615	0.230492487
WBGene00013688	867.2736869	0.2769615	0.13658373	2.027778121	0.042582898	0.230768606
WBGene00011758	525.8200946	0.291236459	0.143677325	2.02701755	0.042660618	0.231008749
WBGene00000764	98.59839281	0.284478581	0.140376039	2.026546576	0.042708805	0.231088721
WBGene00002047	5712.172795	0.242737438	0.119869333	2.025017005	0.042865618	0.231425351
WBGene00002072	508.7026416	0.246790378	0.121920951	2.02418351	0.042951274	0.231425351
WBGene00004078	361.3575084	0.257576876	0.127188709	2.025155203	0.04285143	0.231425351
WBGene00009882	109.1734507	0.296285322	0.146357551	2.024393823	0.042929647	0.231425351
WBGene00010557	570.8339267	0.193642513	0.095673946	2.023983764	0.042971822	0.231425351
WBGene00021713	125.0872358	-0.303359933	0.149846516	-2.024471049	0.042921708	0.231425351
WBGene00018991	308.9749285	0.244606473	0.120932969	2.022661606	0.043108048	0.231978328
WBGene00000231	1171.247431	0.240230201	0.118862097	2.021083305	0.043271142	0.232002512
WBGene00008863	8034.395417	-0.215674308	0.106751116	-2.020347101	0.043347396	0.232002512
WBGene00013168	786.4636137	0.229642983	0.113660011	2.020437805	0.043337995	0.232002512
WBGene00013669	104.8275053	0.277383876	0.137267476	2.020754549	0.04330518	0.232002512
WBGene00015815	637.1098131	0.211304284	0.104504704	2.021959558	0.04318053	0.232002512
WBGene00018238	318.0700816	-0.258109778	0.12767562	-2.021605837	0.043217089	0.232002512
WBGene00022301	1024.466761	0.261721152	0.129495875	2.021077126	0.043271782	0.232002512
WBGene00000857	1228.582429	-0.23665868	0.117342926	-2.016812508	0.043715083	0.232799826
WBGene00001579	153.5557591	0.273823459	0.135851037	2.015615519	0.043840196	0.232799826
WBGene00006638	400.9350876	0.186121041	0.092380611	2.014719732	0.043934023	0.232799826
WBGene00009867	518.9820469	-0.24001332	0.119094821	-2.015312821	0.043871882	0.232799826
WBGene00010787	1541.873079	0.255577186	0.126688669	2.017364203	0.04365752	0.232799826
WBGene00011110	699.1990628	-0.183352654	0.09084536	-2.018294097	0.043560641	0.232799826
WBGene00011944	461.013055	0.277376753	0.137669082	2.0148079	0.043924781	0.232799826
WBGene00017797	1587.94804	0.270519443	0.134110224	2.01714257	0.043680637	0.232799826
WBGene00019005	105.6056934	0.309023932	0.153311307	2.015663023	0.043835225	0.232799826
WBGene00019118	974.9288657	0.247777426	0.122956268	2.015167102	0.043887143	0.232799826
WBGene00020189	207.4266459	0.23451741	0.116385988	2.01499694	0.04390497	0.232799826
WBGene00044200	3880.759552	-0.289458299	0.143649893	-2.015026213	0.043901903	0.232799826
WBGene00219589	5296.106594	-0.181601189	0.090028056	-2.017162162	0.043678593	0.232799826
WBGene00003941	1337.489968	-0.182550684	0.09069272	-2.012848255	0.044130596	0.233126867
WBGene00009163	701.3767853	0.218995945	0.1087547	2.013668795	0.044044318	0.233126867
WBGene00013919	237.6621673	-0.331064148	0.164468452	-2.012934051	0.044121568	0.233126867
WBGene00018764	937.2461242	-0.142197329	0.070633991	-2.013157211	0.044098093	0.233126867
WBGene00043705	334.8497419	0.279178037	0.138727985	2.012413266	0.044176391	0.233190646
WBGene00022069	6566.423729	0.290550436	0.144425701	2.011764074	0.044244813	0.233359352
WBGene00022883	293.8338683	0.248208027	0.123396341	2.011469913	0.044275845	0.233359352
WBGene00016606	518.9899517	0.279758421	0.139151817	2.010454667	0.04438309	0.233746431
WBGene00001997	556.1424844	0.282499016	0.141090952	2.002247575	0.045258111	0.234173641
WBGene00003119	1315.793199	0.198962466	0.099060154	2.00850149	0.044590028	0.234173641
WBGene00003155	1415.218704	0.235584957	0.117444966	2.005917869	0.044865011	0.234173641
WBGene00003159	2431.598123	0.229540915	0.114486567	2.00495936	0.044967392	0.234173641
WBGene00003222	1624.173935	0.210353378	0.104729408	2.008541654	0.044585764	0.234173641
WBGene00004756	994.5510124	0.223920588	0.111777796	2.003265373	0.045148812	0.234173641
WBGene00006518	463.2628904	0.202314879	0.100938878	2.004330577	0.045034661	0.234173641
WBGene00006542	366.2913865	0.207626417	0.103498266	2.006085939	0.04484708	0.234173641
WBGene00006958	360.257208	0.282662737	0.141033219	2.004228076	0.045045634	0.234173641
WBGene00007645	940.1838028	0.204186102	0.101966115	2.002489775	0.045232082	0.234173641
WBGene00008218	552.9322772	0.222780487	0.111183321	2.003722175	0.045099829	0.234173641
WBGene00008683	642.4098972	0.251235727	0.125217673	2.006391922	0.044814449	0.234173641
WBGene00009256	231.0900626	0.265801442	0.132630901	2.004068726	0.045062699	0.234173641
WBGene00011272	346.2321184	-0.209292454	0.104174704	-2.009052539	0.044531562	0.234173641
WBGene00012395	1333.232798	0.29105692	0.145132974	2.005449977	0.044914963	0.234173641
WBGene00014151	3579.448155	0.224526746	0.112114582	2.002654264	0.045214411	0.234173641
WBGene00017373	272.619042	0.305945846	0.152824255	2.001945611	0.045290581	0.234173641
WBGene00017760	1024.618549	0.236320252	0.118056386	2.001757474	0.045310822	0.234173641
WBGene00017816	522.9348712	0.208904655	0.104212659	2.004599605	0.045005869	0.234173641
WBGene00019838	162.500202	0.289870564	0.144692173	2.003360356	0.045138623	0.234173641
WBGene00021319	270.3981129	-0.274945864	0.137203603	-2.003925979	0.04507799	0.234173641
WBGene00021596	171.5276527	0.283537264	0.141635199	2.001884177	0.04529719	0.234173641
WBGene00195071	1472.533924	-0.208360043	0.103820126	-2.006933065	0.044756791	0.234173641
WBGene00196474	1002.243657	-0.295241515	0.147353403	-2.003628753	0.045109843	0.234173641
WBGene00219755	1315.909136	-0.244143043	0.121916609	-2.002541284	0.045226548	0.234173641
WBGene00017195	99.62667193	0.31998167	0.159927461	2.000792533	0.045414752	0.234535484
WBGene00003134	697.7671315	0.254945648	0.127525498	1.99917391	0.04558954	0.23463109
WBGene00006940	744.6939267	0.253638857	0.126899585	1.998736702	0.04563685	0.23463109
WBGene00009069	218.578951	-0.296772383	0.148454876	-1.999074677	0.045600275	0.23463109
WBGene00010302	500.5848085	0.258057308	0.129100019	1.998894422	0.045619778	0.23463109
WBGene00013188	734.6053899	0.224585621	0.112317368	1.999562711	0.045547504	0.23463109
WBGene00020473	1142.264626	-0.186753819	0.093367283	-2.000206203	0.045478002	0.23463109
WBGene00001480	1187.464353	-0.230320739	0.115270516	-1.998088909	0.045707022	0.234817279
WBGene00011049	11450.69123	-0.161630867	0.080914385	-1.997554169	0.045765016	0.234940674
WBGene00006982	8614.801949	-0.214568159	0.107515295	-1.995698926	0.045966704	0.235103372
WBGene00021074	910.6971984	0.262650247	0.131594827	1.995900999	0.0459447	0.235103372
WBGene00021415	854.0192115	-0.218755707	0.109577953	-1.996347827	0.045896076	0.235103372
WBGene00022118	124.6994892	0.241844192	0.121151958	1.996205387	0.045911571	0.235103372
WBGene00022182	232.4538809	0.257713736	0.129080918	1.99652853	0.045876423	0.235103372
WBGene00001653	809.8652767	0.244062128	0.122456279	1.993055233	0.046255399	0.235273793
WBGene00006815	260.6754349	-0.323886807	0.16261959	-1.991683826	0.046405759	0.235273793
WBGene00007139	1262.516343	-0.21146108	0.106159627	-1.991916192	0.046380254	0.235273793
WBGene00007979	409.6265606	-0.200339511	0.100491471	-1.993597158	0.046196096	0.235273793
WBGene00008362	260.0458861	0.231483848	0.116044139	1.99479138	0.046065638	0.235273793
WBGene00008400	1061.461887	0.229671822	0.115366597	1.990800003	0.046502879	0.235273793
WBGene00010638	865.495034	0.298259962	0.149623837	1.993398702	0.046217806	0.235273793
WBGene00011071	1230.629148	0.233387598	0.117155659	1.992115453	0.046358392	0.235273793
WBGene00015347	509.1784902	0.29043212	0.145892138	1.99073181	0.04651038	0.235273793
WBGene00017712	142.4641425	0.301485354	0.151244016	1.993370458	0.046220896	0.235273793
WBGene00017949	4927.930956	-0.229990315	0.115371275	-1.993479877	0.046208925	0.235273793
WBGene00020729	507.305597	-0.203604531	0.102156199	-1.99307075	0.0462537	0.235273793
WBGene00021417	857.9512616	-0.204959939	0.102930501	-1.991245906	0.046453859	0.235273793
WBGene00021755	175.9434525	-0.255300171	0.128219567	-1.991117086	0.046468016	0.235273793
WBGene00235159	175.2358768	-0.231019804	0.115994189	-1.991649798	0.046409495	0.235273793
WBGene00001526	1566.65119	0.229309819	0.115266678	1.989385157	0.046658707	0.235418074
WBGene00012344	370.7219945	0.189862002	0.095414498	1.989865326	0.046605773	0.235418074
WBGene00021377	456.1920611	0.252823367	0.127095666	1.989236723	0.04667508	0.235418074
WBGene00022351	543.7817682	0.232956278	0.117077807	1.989756074	0.046617812	0.235418074
WBGene00019121	506.9964721	0.261327921	0.1313971	1.988840865	0.046718771	0.23546669
WBGene00003410	2122.507318	0.273978266	0.137800996	1.988216887	0.046787708	0.235517777
WBGene00009509	37405.93773	-0.183071999	0.092096653	-1.987824676	0.046831084	0.235517777
WBGene00010437	213.618794	0.27367332	0.137654161	1.98812239	0.046798156	0.235517777
WBGene00006936	1210.300173	0.18729806	0.094271759	1.986788648	0.046945823	0.235923232
WBGene00009665	180.4391967	-0.21709053	0.10932089	-1.985810129	0.047054411	0.23617323
WBGene00011391	197.5265938	0.231005752	0.116333209	1.985724913	0.047063877	0.23617323
WBGene00001835	446.0251075	0.252763748	0.127324105	1.985199481	0.047122282	0.236181095
WBGene00199303	105.2763932	-0.229450898	0.115586782	-1.985096336	0.047133754	0.236181095
WBGene00000780	7475.402036	-0.222032238	0.111877786	-1.98459628	0.047189407	0.236186239
WBGene00012897	2841.870374	0.222743124	0.112242939	1.984473386	0.047203092	0.236186239
WBGene00006490	1078.516055	-0.135263409	0.068178587	-1.983957339	0.047260596	0.23630298
WBGene00000821	1308.400961	-0.194584097	0.098186256	-1.981785487	0.047503254	0.236327191
WBGene00006450	750.4878954	0.265525553	0.133926639	1.982619408	0.047409958	0.236327191
WBGene00006601	204.2345911	-0.21624216	0.109097125	-1.982106852	0.047467283	0.236327191
WBGene00006722	585.0412221	-0.169595522	0.0855454	-1.982520648	0.047420999	0.236327191
WBGene00009974	565.725461	0.20922911	0.105625496	1.980858016	0.047607198	0.236327191
WBGene00011994	1017.590598	0.205397779	0.10366574	1.98134677	0.047552399	0.236327191
WBGene00013445	711.2607586	0.24423441	0.123294352	1.980905096	0.047601918	0.236327191
WBGene00019295	607.3929471	0.236043689	0.1191461	1.981128116	0.047576908	0.236327191
WBGene00022300	1435.722122	0.131839681	0.066554229	1.980936202	0.047598429	0.236327191
WBGene00044435	2144.169593	-0.225045847	0.113574586	-1.981480676	0.047537394	0.236327191
WBGene00012904	477.1435254	-0.174354832	0.088050549	-1.980167464	0.047684714	0.236542181
WBGene00000815	572.9946073	0.236447077	0.119457431	1.979341716	0.047777546	0.236756038
WBGene00012745	370.8078515	-0.227705946	0.115103966	-1.978263253	0.047899016	0.236756038
WBGene00013024	185.4929582	0.25150493	0.127122815	1.978440538	0.04787903	0.236756038
WBGene00016299	10169.81071	-0.212338255	0.107307703	-1.97877925	0.047840866	0.236756038
WBGene00017453	239.3161149	-0.223094687	0.112721728	-1.979163124	0.047797643	0.236756038
WBGene00003390	479.0864441	0.243600164	0.123182882	1.97754882	0.047979628	0.23681335
WBGene00007168	492.4742253	0.224687632	0.113631445	1.977336757	0.048003577	0.23681335
WBGene00023291	1378.780979	-0.203863315	0.103104458	-1.977250249	0.04801335	0.23681335
WBGene00001910	129.4210505	-0.257639685	0.130360214	-1.976367459	0.048113174	0.237136565
WBGene00007008	834.3740089	0.235182365	0.119021748	1.975961282	0.048159162	0.237194166
WBGene00017272	113.6214172	0.264305496	0.13380214	1.975345804	0.048228919	0.237368664
WBGene00014019	408.3895345	0.278658279	0.141089781	1.975042245	0.048263354	0.237369199
WBGene00010231	450.7723355	0.274089979	0.138826462	1.974335266	0.048343633	0.237426297
WBGene00015351	102.4226288	-0.292436286	0.148098276	-1.974609652	0.048312463	0.237426297
WBGene00000839	1028.749379	0.194558887	0.098589302	1.973427976	0.048446823	0.237576381
WBGene00002637	2609.636179	0.252477056	0.127962372	1.973057013	0.048489067	0.237576381
WBGene00003367	1443.622714	0.25318128	0.128299	1.97336909	0.048453527	0.237576381
WBGene00003579	4241.741098	-0.204310561	0.10357376	-1.972609289	0.048540094	0.237576381
WBGene00009287	272.7668326	0.267296781	0.135507712	1.972557699	0.048545976	0.237576381
WBGene00004975	536.2326662	0.256932186	0.13029593	1.971912598	0.048619585	0.237616347
WBGene00012465	313.2275738	0.257955012	0.130836497	1.971582992	0.04865723	0.237616347
WBGene00013269	286.2046165	-0.18323533	0.09293722	-1.971603293	0.048654911	0.237616347
WBGene00004249	11170.38391	-0.204530363	0.103781395	-1.970780632	0.048748973	0.23774847
WBGene00016641	2200.4799	-0.218249969	0.11076058	-1.97046611	0.048784975	0.23774847
WBGene00021547	585.4774845	-0.239639675	0.121617053	-1.970444672	0.04878743	0.23774847
WBGene00016392	492.9886706	0.244343267	0.124086406	1.969138072	0.048937238	0.238310563
WBGene00000889	766.2786166	0.246657431	0.125287255	1.968735217	0.048983505	0.238368006
WBGene00018612	2129.485149	0.245309709	0.124700509	1.96719091	0.049161206	0.239064512
WBGene00008561	130.2272295	0.258402396	0.131426651	1.966133915	0.049283144	0.239320884
WBGene00012431	210.2279056	-0.21074471	0.107181279	-1.966245525	0.049270256	0.239320884
WBGene00012148	1945.464977	0.292771192	0.148979821	1.965173477	0.049394163	0.239531351
WBGene00012879	780.6859963	0.167966142	0.085472009	1.965159638	0.049395764	0.239531351
WBGene00013999	662.0606482	-0.223113293	0.113562274	-1.964677919	0.049451527	0.239633714
WBGene00021292	696.2061811	0.182725568	0.093072028	1.963270509	0.04961475	0.240256301
WBGene00004888	446.869626	0.18346328	0.09346364	1.962937459	0.049653441	0.240275401
WBGene00006359	1270.879543	0.227670313	0.116236674	1.958678835	0.050150411	0.240832408
WBGene00008996	5675.794618	-0.222024335	0.113325744	-1.959169446	0.050092946	0.240832408
WBGene00009098	781.1574112	0.230378556	0.117581918	1.959302585	0.050077361	0.240832408
WBGene00010811	299.3803189	-0.249686742	0.127448412	-1.959120073	0.050098727	0.240832408
WBGene00011712	11093.45234	-0.18315218	0.09342819	-1.960352444	0.04995461	0.240832408
WBGene00012462	117.9193272	-0.284427766	0.145143446	-1.959632165	0.050038799	0.240832408
WBGene00013210	384.935021	0.228683742	0.116612045	1.961064497	0.0498715	0.240832408
WBGene00013924	1183.625752	0.241795657	0.12344901	1.95866825	0.050151651	0.240832408
WBGene00017238	316.1251354	0.271202414	0.138392341	1.959663464	0.050035138	0.240832408
WBGene00044072	672.1974901	0.191824267	0.097791578	1.961562244	0.049813472	0.240832408
WBGene00194675	11088.65472	-0.200743748	0.102402052	-1.96034888	0.049955027	0.240832408
WBGene00009368	2622.87581	0.237917162	0.121571603	1.957012631	0.050345983	0.240887747
WBGene00012972	1590.738432	0.231444753	0.118249698	1.957254487	0.050317556	0.240887747
WBGene00013265	382.4952575	0.25601932	0.130764553	1.957864842	0.050245874	0.240887747
WBGene00017313	896.7120646	0.248571345	0.127026312	1.956849255	0.050365194	0.240887747
WBGene00018797	321.8254123	-0.191551916	0.097888671	-1.956834366	0.050366945	0.240887747
WBGene00044131	315.4096243	0.243980693	0.124684161	1.956789788	0.050372188	0.240887747
WBGene00012566	161.8180852	-0.217385779	0.111131457	-1.956113813	0.050451748	0.240934972
WBGene00195226	193.8025813	-0.214572793	0.109688605	-1.956199496	0.050441658	0.240934972
WBGene00001563	2294.643693	0.236429521	0.121008402	1.953827324	0.050721642	0.241903403
WBGene00007626	906.9379199	-0.190915719	0.0977204	-1.953693582	0.050737466	0.241903403
WBGene00015534	103.0678492	0.325165374	0.16645207	1.953507538	0.050759485	0.241903403
WBGene00020102	1509.274191	0.261859349	0.134102223	1.952684623	0.050856977	0.242109368
WBGene00022127	419.4139188	0.25118643	0.128645207	1.952551797	0.050872728	0.242109368
WBGene00000262	383.4690269	-0.213154033	0.109282288	-1.950490209	0.051117719	0.242119327
WBGene00007118	535.3951999	0.215417488	0.110458553	1.950211029	0.051150972	0.242119327
WBGene00008455	155.0018633	0.266226451	0.136507934	1.95026357	0.051144712	0.242119327
WBGene00009050	444.9465459	0.212045798	0.108751542	1.949818762	0.051197725	0.242119327
WBGene00011883	527.4969315	0.219059733	0.112361925	1.949590416	0.051224957	0.242119327
WBGene00012277	542.4757111	0.181830409	0.093226268	1.950420338	0.05112604	0.242119327
WBGene00012692	1131.587945	0.262227156	0.134443352	1.950465774	0.051120629	0.242119327
WBGene00012943	123.9392136	0.309135006	0.158496251	1.950424722	0.051125518	0.242119327
WBGene00019087	3921.963772	0.204585316	0.104935122	1.949636231	0.051219492	0.242119327
WBGene00045277	1033.518378	-0.252240209	0.129365066	-1.949832494	0.051196087	0.242119327
WBGene00017166	553.2644448	0.228405625	0.117178184	1.949216286	0.051269601	0.242164815
WBGene00006604	919.6523727	-0.164060511	0.084239935	-1.947538431	0.051470217	0.242702646
WBGene00009587	1646.496527	0.233125025	0.119701816	1.947547938	0.051469078	0.242702646
WBGene00012386	833.211565	0.202333402	0.103900125	1.947383615	0.051488761	0.242702646
WBGene00001018	209.1407939	0.268332264	0.137850968	1.946538849	0.051590046	0.24301442
WBGene00007602	640.9823217	0.229170854	0.117754294	1.946178316	0.051633324	0.243052712
WBGene00019002	888.9775398	0.232225398	0.119352733	1.945706582	0.051689996	0.243153959
WBGene00013580	1603.339469	0.206719394	0.106262993	1.945356402	0.051732098	0.24318658
WBGene00012792	8536.1092	-0.188081483	0.096699569	-1.945008493	0.051773956	0.243218007
WBGene00003063	1051.693861	0.208567631	0.107397584	1.942014175	0.052135384	0.243400814
WBGene00003834	1168.039125	0.237944875	0.12257682	1.941189817	0.052235258	0.243400814
WBGene00003851	575.3939967	0.197945191	0.101956992	1.941457745	0.05220278	0.243400814
WBGene00004806	842.3260925	0.223522325	0.115068278	1.942519077	0.052074293	0.243400814
WBGene00010624	209.881765	0.288847828	0.148784246	1.94138718	0.052211332	0.243400814
WBGene00011501	547.9893852	0.268520239	0.138271703	1.941975347	0.052140085	0.243400814
WBGene00011560	2337.491428	0.262366721	0.1351392	1.941455338	0.052203072	0.243400814
WBGene00011777	676.3098269	-0.304020096	0.15647042	-1.942987668	0.052017648	0.243400814
WBGene00013308	131.3385695	0.269539584	0.138793006	1.942025698	0.052133989	0.243400814
WBGene00016564	122.1416554	-0.236296662	0.121719653	-1.941318899	0.052219609	0.243400814
WBGene00019168	1179.174605	0.275625638	0.141956643	1.941618456	0.052183307	0.243400814
WBGene00022015	1889.349345	-0.156311373	0.080424965	-1.943567807	0.051947591	0.243400814
WBGene00003236	110.0618914	0.272229563	0.140364409	1.939448646	0.052446732	0.244159699
WBGene00013737	274.0708364	0.187760686	0.096830768	1.939060166	0.052494012	0.244159699
WBGene00019778	502.5298132	0.176628337	0.091093534	1.93897777	0.052504045	0.244159699
WBGene00015075	468.9622574	0.250498017	0.129258251	1.937965391	0.052627445	0.244423347
WBGene00021208	157.151172	0.273654116	0.141209298	1.937932701	0.052631434	0.244423347
WBGene00009575	550.8196602	-0.154481464	0.079740535	-1.937301561	0.052708492	0.244469177
WBGene00022882	641.4703094	0.241683386	0.124754443	1.93727277	0.052712009	0.244469177
WBGene00019702	130.7880383	-0.240297966	0.124086021	-1.936543404	0.052801182	0.244718615
WBGene00006414	1168.517168	0.233238687	0.120485631	1.935821604	0.052889554	0.24486061
WBGene00015017	767.8457487	0.230305505	0.118976982	1.935714811	0.052902639	0.24486061
WBGene00001072	106.6888181	-0.237849182	0.122921257	-1.934971929	0.05299374	0.245118204
WBGene00004933	1823.799122	-0.188072657	0.097217811	-1.934549397	0.053045615	0.245194135
WBGene00000535	238.4091224	-0.224404856	0.116064114	-1.933455981	0.053180051	0.245321631
WBGene00001016	1535.807239	0.258787872	0.133946773	1.932020212	0.053357011	0.245321631
WBGene00011408	438.4727674	0.242549338	0.125479789	1.932975352	0.053239234	0.245321631
WBGene00011499	1053.35822	-0.270379462	0.139931613	-1.932225724	0.053331652	0.245321631
WBGene00012498	5175.514048	-0.293393527	0.151841271	-1.932238357	0.053330093	0.245321631
WBGene00014914	16130.84972	-0.176683267	0.091418871	-1.932678299	0.05327584	0.245321631
WBGene00015811	525.9122846	0.242297027	0.125364132	1.932746028	0.053267492	0.245321631
WBGene00045036	276.0858315	-0.24370833	0.126129368	-1.932209241	0.053333685	0.245321631
WBGene00195972	267.7417251	-0.319461799	0.165398754	-1.931464367	0.053425652	0.245474008
WBGene00010367	1281.672393	0.249795824	0.129395355	1.93048525	0.053546741	0.245867008
WBGene00021466	527.6723998	0.249767171	0.129407913	1.930076498	0.05359736	0.245936128
WBGene00019296	252.0122309	0.219971932	0.114013044	1.9293576	0.053686484	0.24618172
WBGene00006968	466.0977278	0.230581352	0.119571695	1.928394104	0.053806125	0.246566834
WBGene00012759	229.1354929	-0.236688286	0.122779745	-1.927747006	0.053886602	0.246634652
WBGene00019600	5626.510453	0.226528026	0.117511979	1.927701565	0.053892257	0.246634652
WBGene00017134	352.7859818	0.202886023	0.105269939	1.92729307	0.053943117	0.246642384
WBGene00018572	135.242627	-0.275586667	0.143004775	-1.92711514	0.053965282	0.246642384
WBGene00001585	307.9044458	0.234338652	0.121667409	1.926059361	0.054096962	0.246870912
WBGene00021316	538.810783	0.266415758	0.138336299	1.925855762	0.054122387	0.246870912
WBGene00175030	277.3405646	0.228889935	0.118820531	1.926350042	0.054060681	0.246870912
WBGene00004427	480.5132985	0.202524044	0.10519348	1.925252833	0.054197735	0.246888893
WBGene00018007	512.5206603	0.184477188	0.095812792	1.925392049	0.05418033	0.246888893
WBGene00010560	358.812321	0.221696753	0.115207976	1.924317757	0.054314766	0.247223786
WBGene00017990	379.9698513	-0.227552403	0.118264679	-1.92409437	0.054342756	0.247223786
WBGene00016202	1517.844848	0.255090264	0.132610333	1.923607748	0.054403769	0.247338635
WBGene00003797	840.5212894	0.243612458	0.126669853	1.923207868	0.05445395	0.247404114
WBGene00017811	298.9155617	0.262661519	0.1365988	1.922868424	0.054496576	0.247435209
WBGene00008555	1239.340597	0.21739649	0.113143192	1.921427932	0.05467778	0.248095045
WBGene00000090	556.5688217	0.220663361	0.114949843	1.919649081	0.05490224	0.248110417
WBGene00002981	413.3248034	0.245846939	0.128048387	1.919953421	0.054863783	0.248110417
WBGene00004243	464.9556418	0.234531702	0.122193424	1.919347979	0.05494031	0.248110417
WBGene00007625	282.8562807	0.202529995	0.10555272	1.918756759	0.055015125	0.248110417
WBGene00011063	251.4764113	0.21819929	0.113659154	1.919768737	0.054887117	0.248110417
WBGene00015677	954.5737267	0.262221964	0.136653893	1.918876651	0.054999946	0.248110417
WBGene00016383	259.3184301	0.227734929	0.118694841	1.918659037	0.055027499	0.248110417
WBGene00018092	146.8162898	-0.260045406	0.135475014	-1.919508248	0.054920044	0.248110417
WBGene00018773	1774.687794	-0.193828965	0.101028327	-1.918560582	0.055039968	0.248110417
WBGene00019658	137.7563848	-0.244390567	0.127296168	-1.919857997	0.054875839	0.248110417
WBGene00000863	1496.246955	0.219597044	0.114707865	1.914402685	0.055568723	0.24929368
WBGene00004914	491.5027093	0.212141603	0.110823508	1.914229262	0.055590868	0.24929368
WBGene00008688	700.700695	0.290943187	0.151962225	1.914575723	0.055546634	0.24929368
WBGene00015818	282.4955431	0.202930748	0.105924808	1.915800014	0.055390556	0.24929368
WBGene00019705	2432.86046	-0.183079111	0.09563646	-1.914323374	0.05557885	0.24929368
WBGene00020297	1050.533738	0.205692151	0.10740279	1.915147177	0.055473737	0.24929368
WBGene00022776	148.7195395	0.241070912	0.125847437	1.915580622	0.055418498	0.24929368
WBGene00045511	424.3746486	-0.230946759	0.120587743	-1.915176062	0.055470054	0.24929368
WBGene00021752	304.0032809	0.212345794	0.110952947	1.91383645	0.055641056	0.249357035
WBGene00007505	4436.250144	0.202996561	0.1061091	1.913092853	0.055736167	0.249621497
WBGene00044809	287.7112368	0.27560521	0.144097323	1.912632413	0.055795127	0.24967104
WBGene00194660	67102.59756	-0.192956107	0.100895107	-1.912442665	0.05581944	0.24967104
WBGene00000876	300.8299952	0.22473433	0.117550776	1.911806441	0.055901025	0.249769139
WBGene00020763	980.5010002	0.253146793	0.132419149	1.911708355	0.055913612	0.249769139
WBGene00044262	123.5098271	-0.277857879	0.145423358	-1.910682593	0.056045383	0.250196142
WBGene00012652	520.360822	0.225559413	0.118094703	1.909987556	0.056134816	0.250272243
WBGene00015013	105.7980507	-0.261310809	0.136799336	-1.910176007	0.056110555	0.250272243
WBGene00004277	385.7973084	0.206009001	0.107882231	1.909573047	0.056188208	0.250348879
WBGene00011142	687.3758709	0.232950604	0.122026911	1.909010086	0.056260791	0.250349657
WBGene00012485	144.5080328	-0.233020302	0.122050172	-1.909217316	0.056234063	0.250349657
WBGene00008371	244.4046019	0.218254714	0.114377103	1.908202848	0.056365004	0.250652091
WBGene00020184	890.4842699	0.268247092	0.140597543	1.9079074	0.056403186	0.250660687
WBGene00013140	373.6963442	0.237310503	0.124407609	1.907524032	0.056452762	0.250719878
WBGene00009188	512.8548643	0.217704064	0.114263838	1.905275266	0.056744299	0.251852905
WBGene00004323	935.791687	0.25810447	0.135538434	1.90428989	0.05687244	0.252178159
WBGene00012276	854.3804712	0.184478762	0.096882421	1.904151028	0.056890518	0.252178159
WBGene00006703	631.7459617	0.225473023	0.118517005	1.902452924	0.057111968	0.252835632
WBGene00019131	3560.165507	-0.143433365	0.075392045	-1.902499992	0.05710582	0.252835632
WBGene00000382	807.9083174	0.23948241	0.12593056	1.901702102	0.057210111	0.252952007
WBGene00017801	233.4055689	0.221666282	0.116562654	1.901692128	0.057211416	0.252952007
WBGene00004187	2574.541215	0.215921567	0.113585667	1.900957876	0.05730753	0.253168332
WBGene00019275	453.5861652	0.230925009	0.121490936	1.900759158	0.057333566	0.253168332
WBGene00017929	494.1287205	0.212085004	0.111605027	1.900317657	0.057391446	0.253262186
WBGene00002048	213.5831436	-0.233397882	0.122857699	-1.899741603	0.057467038	0.253434035
WBGene00195357	783.6290959	-0.29973242	0.1578148	-1.899266859	0.057529398	0.253547347
WBGene00006737	1580.530431	0.207244133	0.109243628	1.89708212	0.057817101	0.253702239
WBGene00008173	419.0020031	0.191171616	0.100715564	1.8981338	0.057678459	0.253702239
WBGene00011398	3659.005109	-0.176321009	0.092944849	-1.897049818	0.057821363	0.253702239
WBGene00012496	588.8125784	0.247897946	0.130573501	1.89853181	0.057626061	0.253702239
WBGene00012845	1643.480622	0.183841309	0.096895424	1.897316736	0.057786147	0.253702239
WBGene00018666	129.7604448	-0.241285591	0.127114545	-1.898174519	0.057673096	0.253702239
WBGene00019698	414.6687257	0.233568086	0.123078576	1.897715208	0.057733608	0.253702239
WBGene00001979	1385.678782	0.242144697	0.127762346	1.895274351	0.058056064	0.254048514
WBGene00005191	765.4746477	-0.254816027	0.134450602	-1.89523902	0.058060743	0.254048514
WBGene00009661	958.0291418	0.22593927	0.119189483	1.895630931	0.058008864	0.254048514
WBGene00010405	838.1447233	0.216449294	0.114210378	1.895180604	0.058068479	0.254048514
WBGene00017733	722.9791145	0.241167334	0.127260813	1.895063596	0.058083977	0.254048514
WBGene00004437	456.3431004	0.26512869	0.139995645	1.89383526	0.05824688	0.254278519
WBGene00016249	507.9362366	0.229989986	0.121428334	1.894038884	0.058219849	0.254278519
WBGene00022618	385.0897214	0.216266553	0.114193336	1.893863165	0.058243175	0.254278519
WBGene00016993	12705.28502	-0.131919385	0.069700745	-1.892653882	0.058403913	0.254642535
WBGene00020207	415.187487	-0.286687644	0.151456436	-1.892871978	0.058374897	0.254642535
WBGene00008398	820.8563818	-0.190783878	0.100868929	-1.891403819	0.058570459	0.254916342
WBGene00012735	144.2623242	0.235272485	0.124411952	1.891076224	0.05861417	0.254916342
WBGene00016953	1291.788333	-0.223866983	0.118333147	-1.891836637	0.05851275	0.254916342
WBGene00020868	246.887452	0.207142753	0.109522918	1.89131879	0.058581802	0.254916342
WBGene00019946	240.0458382	0.187532416	0.099198438	1.890477516	0.058694125	0.255099806
WBGene00021004	921.645466	0.245693513	0.129982257	1.890208083	0.058730136	0.255099806
WBGene00001660	1098.281388	0.192676926	0.101973833	1.889474192	0.058828318	0.255205657
WBGene00016754	103.8126166	0.266404489	0.140986073	1.889580172	0.058814131	0.255205657
WBGene00003982	364.0283796	0.258374084	0.13680047	1.888692955	0.058932983	0.255339335
WBGene00007500	751.9360245	0.240135645	0.127135889	1.888810834	0.058917181	0.255339335
WBGene00011806	792.9945432	0.218660915	0.115918706	1.886329843	0.05925052	0.256554381
WBGene00003153	2242.797369	-0.160272553	0.085011237	-1.885310214	0.059387968	0.256827892
WBGene00008317	841.8573964	-0.2014683	0.106850375	-1.885517946	0.059359944	0.256827892
WBGene00006616	5110.698049	-0.195400906	0.103692948	-1.884418468	0.059508394	0.256866755
WBGene00020455	209.1110546	-0.241471668	0.128126928	-1.884628566	0.059480003	0.256866755
WBGene00235158	22450.23365	-0.219826594	0.116634219	-1.884752137	0.05946331	0.256866755
WBGene00018285	1498.644752	0.225291262	0.119614603	1.883476239	0.059635857	0.257256364
WBGene00008380	575.1458254	0.251802257	0.133776266	1.882264058	0.059800172	0.257643731
WBGene00013243	345.4252282	0.232306151	0.123413915	1.882333542	0.059790743	0.257643731
WBGene00000276	691.2084285	0.213017921	0.113409014	1.878315602	0.060338003	0.25807411
WBGene00001411	838.135607	-0.132422774	0.070484388	-1.87875326	0.060278192	0.25807411
WBGene00001836	1497.539687	-0.139106995	0.07398817	-1.880124827	0.060091068	0.25807411
WBGene00004798	833.7179513	0.207911526	0.110703467	1.878094091	0.060368295	0.25807411
WBGene00004930	236.3233295	0.1929715	0.102701544	1.878954229	0.060250743	0.25807411
WBGene00006394	160.7535298	0.258073474	0.137401747	1.878240127	0.060348323	0.25807411
WBGene00009404	238.244423	0.264200712	0.140566258	1.879545741	0.060170014	0.25807411
WBGene00009697	719.9907266	-0.210021985	0.111834565	-1.87797024	0.060385236	0.25807411
WBGene00012974	114.7761975	0.281379659	0.149740551	1.879114625	0.060228844	0.25807411
WBGene00020858	568.1851886	0.185737911	0.098757862	1.880740506	0.060007227	0.25807411
WBGene00021286	328.3583433	0.199690441	0.106183572	1.88061522	0.06002428	0.25807411
WBGene00021311	670.5740653	0.246950335	0.131491499	1.87807072	0.060371491	0.25807411
WBGene00022309	125.7065007	0.252166734	0.134071946	1.880831463	0.059994849	0.25807411
WBGene00012351	428.2626462	0.196481246	0.104793211	1.874942505	0.060800634	0.259528631
WBGene00016639	1388.262413	-0.215918252	0.115145492	-1.875177638	0.060768289	0.259528631
WBGene00000890	382.1750782	-0.178631689	0.095359786	-1.873239198	0.061035362	0.259537267
WBGene00003848	353.9683809	-0.267767313	0.142865241	-1.874264938	0.060893918	0.259537267
WBGene00010779	544.1557476	-0.238696151	0.127404097	-1.873535917	0.060994418	0.259537267
WBGene00016558	14198.07206	-0.190520294	0.101708969	-1.873190692	0.061042057	0.259537267
WBGene00018513	389.4353351	0.174749145	0.093239769	1.874191104	0.06090409	0.259537267
WBGene00018711	4563.85638	-0.16943459	0.090460558	-1.87302173	0.061065384	0.259537267
WBGene00021512	849.8086098	0.235369261	0.125598815	1.873976759	0.060933628	0.259537267
WBGene00010922	124.3782076	0.281198746	0.150166492	1.872579846	0.061126427	0.259637125
WBGene00005014	163.8571529	0.226831719	0.121209826	1.871397117	0.061290058	0.259853313
WBGene00013344	203.9736132	0.234685119	0.125392314	1.871606892	0.061261009	0.259853313
WBGene00021757	279.5677145	0.209382293	0.111853992	1.87192508	0.061216969	0.259853313
WBGene00013805	743.2203489	-0.18320804	0.097972836	-1.869988127	0.061485467	0.260386561
WBGene00017800	900.7609358	0.228588306	0.122243184	1.869947254	0.061491143	0.260386561
WBGene00022335	507.9491409	0.261070943	0.139688606	1.868949444	0.061629848	0.260814199
WBGene00021327	362.9256604	0.225034765	0.120426064	1.868654993	0.06167083	0.260828004
WBGene00003393	1011.810011	0.246438925	0.131975929	1.867302077	0.061859416	0.261465684
WBGene00003803	431.997217	0.178772415	0.095819696	1.865716782	0.062081	0.261586581
WBGene00003925	903.6141658	0.165608015	0.0887753	1.865474013	0.062114991	0.261586581
WBGene00016166	405.9196295	0.231637432	0.12409769	1.866573289	0.061961201	0.261586581
WBGene00018328	292.8713271	-0.217027716	0.116299691	-1.866107423	0.062026338	0.261586581
WBGene00020687	575.2490715	0.15034293	0.080558055	1.866268113	0.062003864	0.261586581
WBGene00021443	539.2731192	0.161909106	0.086772943	1.865893923	0.062056208	0.261586581
WBGene00020443	99.55198401	0.306332651	0.164243148	1.865116784	0.062165036	0.261637996
WBGene00010562	474.2426591	0.225952617	0.121168775	1.864775945	0.062212816	0.261673028
WBGene00012435	238.2962121	0.251810544	0.135053986	1.864517668	0.062249043	0.261673028
WBGene00015235	336.9637292	0.234617431	0.125859595	1.864120344	0.062304806	0.26174832
WBGene00011051	1469.493584	0.195973334	0.105145296	1.863833589	0.062345077	0.261758476
WBGene00011975	536.9074624	0.196498969	0.105547082	1.861718624	0.062642762	0.262487558
WBGene00014114	783.504384	0.187585727	0.100732408	1.862218236	0.062572335	0.262487558
WBGene00017642	1009.378097	0.232237355	0.124734182	1.861858158	0.062623086	0.262487558
WBGene00018290	522.3120572	0.224816707	0.120770405	1.861521516	0.062670565	0.262487558
WBGene00011061	1378.932346	0.234746466	0.126214778	1.859896837	0.062900123	0.263249277
WBGene00016987	450.8305196	0.292515178	0.157291945	1.859695853	0.062928569	0.263249277
WBGene00019747	446.2845322	0.244896772	0.131723551	1.859172254	0.063002726	0.263400153
WBGene00004919	296.7831565	0.193014168	0.103902036	1.85765531	0.063217979	0.263709343
WBGene00013157	1284.804229	-0.210262367	0.113194525	-1.857531257	0.063235608	0.263709343
WBGene00016966	160.7253956	0.264623054	0.142417386	1.858081102	0.063157498	0.263709343
WBGene00018680	324.0987034	0.260837661	0.140448902	1.857171242	0.063286795	0.263709343
WBGene00019808	140.8599079	0.243882586	0.131328683	1.857039767	0.063305497	0.263709343
WBGene00022163	23911.85993	-0.171996887	0.092590632	-1.857605717	0.063225026	0.263709343
WBGene00001225	911.285754	0.213308158	0.114934047	1.855917922	0.063465258	0.263787581
WBGene00007278	237.2531385	0.277673825	0.149606252	1.856030889	0.063449155	0.263787581
WBGene00022193	228.9586149	0.240900044	0.129806718	1.855836495	0.063476867	0.263787581
WBGene00197415	235.8475485	-0.271453728	0.146231004	-1.856334987	0.063405825	0.263787581
WBGene00011805	3116.07914	-0.141978775	0.0765219	-1.855400545	0.06353905	0.263887404
WBGene00010336	104.0710479	-0.257476539	0.138801085	-1.855003791	0.063595685	0.263919139
WBGene00019801	486.1967965	0.193880116	0.104528155	1.854812384	0.063623023	0.263919139
WBGene00006944	726.8556359	0.181053453	0.097661287	1.853891728	0.063754652	0.264306604
WBGene00004319	981.9947778	0.161500703	0.087223423	1.851574926	0.064086886	0.264356265
WBGene00004464	213.8614711	0.247299989	0.133531706	1.851994533	0.064026608	0.264356265
WBGene00006447	353.2927407	0.216505691	0.116919582	1.851748754	0.06406191	0.264356265
WBGene00009025	142.3791609	0.272357126	0.147038639	1.852282689	0.06398524	0.264356265
WBGene00010451	3109.459825	-0.19255026	0.103976606	-1.851861368	0.064045733	0.264356265
WBGene00011216	313.108625	0.233146636	0.125830225	1.852866713	0.063901465	0.264356265
WBGene00016057	106.6538222	0.238249486	0.128654173	1.851859761	0.064045963	0.264356265
WBGene00017435	839.3010634	0.269879369	0.145769697	1.851409279	0.064110695	0.264356265
WBGene00201151	405.9349618	-0.301033589	0.162474222	-1.852808316	0.063909838	0.264356265
WBGene00011087	1173.096699	0.178048218	0.096201326	1.850787577	0.064200119	0.264443253
WBGene00021022	286.1323977	0.24671293	0.133305673	1.85073091	0.064208275	0.264443253
WBGene00008426	455.6095144	-0.203976483	0.110303707	-1.849225993	0.064425187	0.265020921
WBGene00019139	1096.951336	-0.201295556	0.108852268	-1.849254589	0.06442106	0.265020921
WBGene00016216	4941.823513	-0.16449279	0.088969226	-1.848872904	0.064476167	0.265072946
WBGene00002036	8335.279783	0.235761812	0.127540102	1.848530847	0.064525586	0.265118496
WBGene00044585	160.5083419	-0.273745335	0.14811226	-1.848228737	0.06456926	0.265140399
WBGene00001081	300.3830531	0.268433871	0.145396391	1.846221007	0.064860122	0.265593248
WBGene00006714	5995.31728	-0.191128246	0.103496336	-1.846715085	0.064788444	0.265593248
WBGene00012124	2772.24157	-0.223957137	0.121297904	-1.846339711	0.064842895	0.265593248
WBGene00012697	360.6764964	0.23513219	0.127364083	1.846142048	0.064871583	0.265593248
WBGene00017746	189.5790849	0.204844591	0.110899649	1.847116673	0.064730233	0.265593248
WBGene00001971	428.2859523	0.235414525	0.127662398	1.844039656	0.065177361	0.265828573
WBGene00006061	220.0719044	0.226992811	0.123079157	1.84428312	0.06514189	0.265828573
WBGene00012442	960.2364277	-0.189855582	0.102964312	-1.843896965	0.065198157	0.265828573
WBGene00019762	1016.650259	0.226161448	0.122607358	1.844599318	0.065095846	0.265828573
WBGene00022297	248.0170748	-0.216745078	0.117533976	-1.844105721	0.065167734	0.265828573
WBGene00022360	710.0997742	0.162024579	0.087869441	1.843924082	0.065194205	0.265828573
WBGene00077771	195.2780426	0.206713704	0.112086828	1.844228336	0.06514987	0.265828573
WBGene00010037	1646.415553	0.254407564	0.138002385	1.843501207	0.065255866	0.26586204
WBGene00011608	1327.41094	-0.165125437	0.08958077	-1.843313439	0.06528326	0.26586204
WBGene00000197	4525.732549	0.225284933	0.122246891	1.842868413	0.065348225	0.265969969
WBGene00000765	462.3004533	0.238422273	0.129459537	1.84167407	0.065522839	0.266523785
WBGene00001832	3699.570178	0.261777413	0.142240251	1.84038914	0.065711127	0.266837287
WBGene00003021	3214.275489	-0.162886396	0.088507988	-1.840358132	0.065715676	0.266837287
WBGene00020349	605.1354377	-0.200169384	0.108754974	-1.840553837	0.065686968	0.266837287
WBGene00015007	1306.87383	0.237314544	0.128988352	1.839813747	0.065795587	0.266848376
WBGene00021671	9335.001477	-0.19133088	0.103993918	-1.839827587	0.065793554	0.266848376
WBGene00006997	1376.87116	0.26028475	0.141525844	1.839132297	0.06589573	0.267097873
WBGene00006733	557.4399563	0.240220054	0.130650118	1.838651642	0.06596644	0.267227847
WBGene00004307	270.6762014	0.18475681	0.100502176	1.838336406	0.06601285	0.267259283
WBGene00013736	2454.174975	-0.210855174	0.114739249	-1.837690024	0.066108095	0.267331856
WBGene00016844	198.0103758	0.255271088	0.138899588	1.837810252	0.06609037	0.267331856
WBGene00010582	1608.70341	0.243563604	0.132564207	1.837325543	0.066161851	0.26739287
WBGene00001561	1428.864902	0.147244335	0.080154561	1.837005068	0.066209147	0.267427718
WBGene00003040	534.7982536	0.159791315	0.087012462	1.836418724	0.066295752	0.267465069
WBGene00018151	346.8344373	0.186151073	0.101352127	1.836676527	0.066257662	0.267465069
WBGene00044371	602.0251251	-0.212091722	0.115534685	-1.835740685	0.066396018	0.267713389
WBGene00007922	210.0724134	0.196147615	0.106920125	1.834524751	0.066576137	0.267876096
WBGene00009341	206.6351776	0.251722876	0.137215781	1.834503822	0.066579241	0.267876096
WBGene00219303	291.7582839	-0.267506662	0.145826103	-1.83442235	0.066591324	0.267876096
WBGene00271647	1046.10485	-0.201832995	0.109997061	-1.834894435	0.066521332	0.267876096
WBGene00010678	111.4682964	0.248033228	0.135240628	1.834014169	0.066651891	0.267963852
WBGene00016045	562.7133909	0.16972785	0.092564333	1.83362042	0.066710359	0.268043075
WBGene00044372	1244.618046	-0.158209945	0.086362173	-1.831935675	0.066961005	0.26889393
WBGene00019464	193.450591	0.235645771	0.128653428	1.831632278	0.067006224	0.268919351
WBGene00013109	429.8429863	0.181148996	0.098945785	1.830790423	0.06713183	0.26895516
WBGene00013881	382.020675	-0.178925468	0.097722687	-1.830951162	0.067107833	0.26895516
WBGene00023284	10789.50662	-0.167787032	0.091624534	-1.831245684	0.067063881	0.26895516
WBGene00006592	5760.004686	-0.173119038	0.094631156	-1.82940846	0.067338441	0.269029348
WBGene00016937	494.5169275	-0.207474358	0.113402053	-1.829546749	0.067317743	0.269029348
WBGene00019719	368.4973411	0.242519591	0.132570332	1.829365491	0.067344874	0.269029348
WBGene00022970	321.8667189	0.235499618	0.128722173	1.82951867	0.067321945	0.269029348
WBGene00077772	1699.991526	-0.223655586	0.122198787	-1.830260283	0.067211027	0.269029348
WBGene00004726	1116.19795	0.251311331	0.137485106	1.827916773	0.067562043	0.269699746
WBGene00015064	433.8781748	-0.181135499	0.099116552	-1.827499993	0.067624627	0.269699746
WBGene00021237	138.8902717	-0.237670967	0.130054915	-1.82746624	0.067629698	0.269699746
WBGene00016333	395.5566499	0.180547983	0.098893263	1.825685377	0.067897667	0.270612316
WBGene00001214	2227.033548	0.188410347	0.103244879	1.82488807	0.068017922	0.270623665
WBGene00013355	886.4662242	0.144980142	0.079426456	1.825338172	0.067950013	0.270623665
WBGene00013435	1048.484686	0.126918161	0.069543347	1.825022325	0.067997661	0.270623665
WBGene00015806	1186.863255	0.22529407	0.123547774	1.82353807	0.068221937	0.271279294
WBGene00001093	1615.316871	0.192543409	0.105680698	1.821935439	0.068464782	0.272088488
WBGene00021941	1163.234584	-0.213837204	0.117389555	-1.821603319	0.068515197	0.272132445
WBGene00000498	1030.955705	0.206851142	0.113718678	1.818972457	0.068915632	0.273034967
WBGene00016409	441.0932778	0.183822599	0.101016277	1.819732465	0.068799757	0.273034967
WBGene00017268	738.9733539	0.252303458	0.138670373	1.819447462	0.068843191	0.273034967
WBGene00019811	651.9644049	0.189999007	0.104463146	1.818813759	0.068939849	0.273034967
WBGene00021545	527.4091614	0.198512615	0.109129558	1.81905452	0.068903113	0.273034967
WBGene00012527	368.4962203	0.177321394	0.097568448	1.817405099	0.069155108	0.273574124
WBGene00017405	3260.431909	-0.17033005	0.093716767	-1.817498144	0.069140872	0.273574124
WBGene00022198	3688.005685	-0.164149793	0.090367231	-1.816474741	0.069297579	0.273980995
WBGene00198974	884.375251	-0.195445889	0.107631827	-1.815874482	0.069389629	0.274188161
WBGene00004324	715.1620786	0.215511956	0.118817307	1.813809471	0.069707064	0.275285178
WBGene00000089	8252.666229	-0.191856414	0.105809649	-1.813222291	0.069797543	0.27540246
WBGene00000375	227.8321053	0.232833808	0.12843582	1.812841687	0.069856242	0.27540246
WBGene00015647	530.801388	-0.201547641	0.111163654	-1.8130714	0.06982081	0.27540246
WBGene00001973	1036.945153	0.245056537	0.135227452	1.812180391	0.069958328	0.275490796
WBGene00004462	535.6520745	0.225960226	0.12468951	1.812183132	0.069957905	0.275490796
WBGene00001160	643.4611378	0.228267804	0.126097765	1.810244651	0.070257856	0.275812749
WBGene00001574	448.0495937	0.163521064	0.090454003	1.807781393	0.070640531	0.275812749
WBGene00003576	933.0990688	0.18669179	0.103211689	1.80882409	0.070478336	0.275812749
WBGene00003678	1704.859128	0.287974625	0.159240785	1.808422542	0.070540762	0.275812749
WBGene00006812	177.9666481	-0.24526378	0.135643926	-1.808144212	0.070584059	0.275812749
WBGene00007063	315.8221888	-0.22464181	0.124255269	-1.807905707	0.070621177	0.275812749
WBGene00007277	256.3572107	0.194035094	0.10720554	1.809935329	0.070305817	0.275812749
WBGene00007385	271.4739807	0.193615027	0.10703435	1.808905534	0.070465681	0.275812749
WBGene00008948	720.7120824	0.227605867	0.125834686	1.808768902	0.070486913	0.275812749
WBGene00011225	326.6505315	0.199043657	0.110071525	1.808311986	0.070557957	0.275812749
WBGene00012033	1101.405663	-0.164447608	0.090796275	-1.811171308	0.070114338	0.275812749
WBGene00018953	1169.607799	0.189082427	0.104428988	1.810631606	0.070197896	0.275812749
WBGene00019322	196.1577279	-0.209384268	0.115678865	-1.810047732	0.070288385	0.275812749
WBGene00020290	635.0684857	0.20152295	0.11149023	1.807539104	0.070678263	0.275812749
WBGene00020742	924.2794857	0.209346463	0.115694629	1.809474348	0.070377342	0.275812749
WBGene00022377	1673.268919	-0.197308089	0.109078542	-1.808862549	0.07047236	0.275812749
WBGene00021808	2069.046345	-0.207029448	0.114562767	-1.807126808	0.07074251	0.275907758
WBGene00021449	333.8741043	-0.235150967	0.130174825	-1.806424296	0.070852089	0.276179368
WBGene00003783	367.7693073	0.214439006	0.118745208	1.805875036	0.070937861	0.276357921
WBGene00017344	12948.90255	-0.185342591	0.102648478	-1.805604859	0.070980083	0.276366709
WBGene00009004	151.1044523	0.230088124	0.127488977	1.804768766	0.071110874	0.276564507
WBGene00010697	358.7735727	0.239926807	0.132938735	1.804792305	0.071107189	0.276564507
WBGene00010610	1506.346351	-0.18724877	0.103796149	-1.804004971	0.071230528	0.276874142
WBGene00006804	423.9217669	0.171875962	0.095355446	1.802476627	0.071470449	0.277105617
WBGene00007188	340.8967724	0.173838437	0.096444937	1.802463062	0.071472581	0.277105617
WBGene00014209	1712.2332	0.190637035	0.105771406	1.802349444	0.071490444	0.277105617
WBGene00018957	176.6187116	0.242526646	0.134530438	1.802764115	0.071425268	0.277105617
WBGene00021689	578.9009229	0.174753348	0.096920073	1.803066615	0.071377754	0.277105617
WBGene00020629	725.3507903	0.243594564	0.13519254	1.801834367	0.071571469	0.277264262
WBGene00020346	740.9008991	0.198633407	0.110289468	1.801018814	0.071699915	0.277450985
WBGene00021209	751.818778	-0.170245296	0.094525981	-1.801042368	0.071696202	0.277450985
WBGene00001232	485.0681241	0.196585814	0.109175826	1.800635012	0.071760427	0.277529839
WBGene00004254	1378.715515	0.167670216	0.093148159	1.800037893	0.071854655	0.277583765
WBGene00021819	917.293774	-0.190830863	0.106010628	-1.800110675	0.071843164	0.277583765
WBGene00013201	655.9865595	0.173763395	0.096556414	1.799604885	0.071923049	0.277692845
WBGene00011940	864.5722241	0.22164713	0.123214246	1.798875833	0.072038324	0.277739267
WBGene00021539	514.0574804	0.234029919	0.130105754	1.798766865	0.072055567	0.277739267
WBGene00046293	299.9843496	-0.179334285	0.099684561	-1.799017648	0.072015889	0.277739267
WBGene00011589	498.0452271	0.203692059	0.113260785	1.798434104	0.072108242	0.277756099
WBGene00022854	1431.163133	-0.131672062	0.073223072	-1.798231889	0.072140268	0.277756099
WBGene00001865	1635.183213	0.233360035	0.129830317	1.797423287	0.072268447	0.277785608
WBGene00004389	395.237418	0.189218324	0.105267356	1.797502391	0.072255899	0.277785608
WBGene00008078	404.0698284	-0.211856449	0.117842028	-1.797800429	0.072208639	0.277785608
WBGene00008035	3240.117393	0.209362945	0.116528961	1.796660191	0.072389582	0.278096646
WBGene00006324	518.295764	0.160776662	0.089559825	1.795187323	0.07262386	0.278793557
WBGene00013508	3936.230462	-0.181876384	0.101335129	-1.794800938	0.072685421	0.278793557
WBGene00021465	3389.446937	0.195696989	0.10903797	1.794760024	0.072691943	0.278793557
WBGene00002153	432.7968624	0.191698142	0.106961673	1.792213379	0.073098792	0.279578622
WBGene00010209	176.5307342	-0.194945003	0.108772123	-1.792233133	0.073095629	0.279578622
WBGene00015623	112.0169302	-0.249349959	0.139124537	-1.792278811	0.073088316	0.279578622
WBGene00017765	381.2496456	-0.206826456	0.115380308	-1.792562877	0.073042847	0.279578622
WBGene00022787	193.1828886	0.2107807	0.117547618	1.7931516	0.072948687	0.279578622
WBGene00000507	267.7114603	0.211011103	0.118010803	1.788065981	0.073765363	0.27980663
WBGene00001209	867.0916835	0.236163751	0.131947399	1.789832559	0.073480833	0.27980663
WBGene00004322	583.8711955	0.23598896	0.131928145	1.788768882	0.073652044	0.27980663
WBGene00009173	590.8605199	0.203893691	0.113859554	1.790747315	0.073333853	0.27980663
WBGene00010036	276.910527	0.270466229	0.151187834	1.788941757	0.073624196	0.27980663
WBGene00011433	3755.327698	-0.207456849	0.115995525	-1.788490111	0.07369697	0.27980663
WBGene00011988	556.1181278	0.18527564	0.10348997	1.790276297	0.073409505	0.27980663
WBGene00012716	347.7768429	0.242835492	0.135800586	1.788177058	0.073747446	0.27980663
WBGene00013729	5663.601576	0.188107813	0.105104843	1.789715943	0.073499588	0.27980663
WBGene00014016	264.5458083	0.203659671	0.113805644	1.789539291	0.073528006	0.27980663
WBGene00014915	2362.168843	-0.158621729	0.088572346	-1.790871939	0.073313848	0.27980663
WBGene00016810	151.2831586	0.213297487	0.119141878	1.790281393	0.073408686	0.27980663
WBGene00018149	197.6505259	0.22328484	0.124728862	1.790161767	0.073427909	0.27980663
WBGene00019498	299.827039	0.192042769	0.107362889	1.78872579	0.073658987	0.27980663
WBGene00199591	311.1928011	-0.29682257	0.165783609	-1.790421697	0.073386145	0.27980663
WBGene00015102	675.1307512	0.196032228	0.109694904	1.787067771	0.073926536	0.280264252
WBGene00003479	274.8208443	0.208882666	0.116976593	1.785679171	0.07415122	0.280677997
WBGene00006996	1268.356322	0.227658642	0.127468298	1.786002052	0.074098926	0.280677997
WBGene00021271	610.1223876	-0.206689637	0.115750962	-1.785640774	0.074157441	0.280677997
WBGene00000536	185.1364778	-0.194494909	0.108949111	-1.785190421	0.074230435	0.28080058
WBGene00000274	2033.216277	0.200526373	0.112407734	1.783919724	0.07443671	0.281426929
WBGene00016112	183.0571524	-0.239718747	0.134442486	-1.783057974	0.074576867	0.281648843
WBGene00044077	1562.272067	0.20527156	0.11512293	1.783064067	0.074575875	0.281648843
WBGene00044149	1411.286141	-0.205154617	0.11511151	-1.782225053	0.074712539	0.282007209
WBGene00001037	870.1674059	0.208023262	0.117062582	1.777026089	0.075563948	0.282072368
WBGene00001793	978.0940979	0.186600223	0.10485259	1.779643435	0.075134333	0.282072368
WBGene00002033	630.684619	0.171790502	0.096800661	1.77468314	0.075950221	0.282072368
WBGene00004060	642.3481446	0.14228134	0.080330508	1.771199295	0.076527567	0.282072368
WBGene00004101	549.8007205	0.235371986	0.132681264	1.773965509	0.076068856	0.282072368
WBGene00004775	2506.578011	0.198258392	0.111545945	1.777369785	0.075507419	0.282072368
WBGene00006432	1431.736205	-0.235749346	0.133090097	-1.771351523	0.076502264	0.282072368
WBGene00006619	245.6871368	0.253895436	0.14254894	1.781110653	0.074894376	0.282072368
WBGene00008764	537.2584593	-0.160064611	0.090377255	-1.771071828	0.076548758	0.282072368
WBGene00008973	122.9801335	-0.273451549	0.154082131	-1.77471293	0.075945299	0.282072368
WBGene00009128	253.78466	0.226703389	0.127852825	1.773159021	0.07620236	0.282072368
WBGene00009453	405.6200776	-0.232523248	0.131103474	-1.773585711	0.076131703	0.282072368
WBGene00010990	1341.074183	0.216177439	0.122019636	1.771661074	0.076450835	0.282072368
WBGene00012109	629.9331825	0.191456506	0.107567631	1.779870994	0.075097076	0.282072368
WBGene00012830	225.1521725	-0.209596565	0.118088622	-1.774909053	0.075912905	0.282072368
WBGene00013248	2501.86064	-0.176605652	0.09950232	-1.774889797	0.075916085	0.282072368
WBGene00013695	597.691749	-0.179724678	0.101130005	-1.777164734	0.07554114	0.282072368
WBGene00014613	305.9563185	-0.157584787	0.088571512	-1.7791814	0.075210027	0.282072368
WBGene00015125	603.4697149	0.215583702	0.121170183	1.779181118	0.075210073	0.282072368
WBGene00015515	2818.12677	0.203880068	0.115047474	1.772138584	0.076371555	0.282072368
WBGene00016311	408.8871275	0.173485886	0.097550423	1.778422691	0.075334459	0.282072368
WBGene00016384	457.9978963	-0.143334408	0.080786502	-1.77423708	0.076023943	0.282072368
WBGene00016607	490.9147983	0.230932627	0.129825406	1.778793794	0.075273575	0.282072368
WBGene00017319	342.5059612	0.252053054	0.141649702	1.779411113	0.075172386	0.282072368
WBGene00017460	306.253245	-0.195867748	0.110450487	-1.773353402	0.076170165	0.282072368
WBGene00017799	207.1464215	0.205119447	0.115529045	1.775479469	0.075818753	0.282072368
WBGene00018304	926.1216254	-0.217173305	0.122323762	-1.77539754	0.07583227	0.282072368
WBGene00018390	10946.80578	-0.141834559	0.079629798	-1.781174411	0.074883963	0.282072368
WBGene00018610	218.9391489	0.187855819	0.105665074	1.777842114	0.07542979	0.282072368
WBGene00018898	3930.731472	0.247766867	0.139348063	1.778043137	0.07539677	0.282072368
WBGene00020423	599.1027182	0.218868528	0.123546469	1.771548226	0.076469581	0.282072368
WBGene00021012	1174.474794	0.214160286	0.120790789	1.772985245	0.076231152	0.282072368
WBGene00021264	883.5099281	-0.187940825	0.106035102	-1.772439707	0.076321596	0.282072368
WBGene00021401	113.0741496	0.233172214	0.131177686	1.77752955	0.075481153	0.282072368
WBGene00021664	1693.547956	-0.175593564	0.09903019	-1.773131641	0.076206896	0.282072368
WBGene00021905	1259.721111	0.212169981	0.119804278	1.770971665	0.076565414	0.282072368
WBGene00022031	245.1677858	-0.195578379	0.110045183	-1.77725525	0.075526253	0.282072368
WBGene00022379	541.3885523	-0.247794637	0.139267742	-1.779268008	0.075195833	0.282072368
WBGene00022441	1223.808797	-0.213650206	0.120579594	-1.771860385	0.076417736	0.282072368
WBGene00022722	480.1004099	0.213317609	0.120451143	1.770988662	0.076562587	0.282072368
WBGene00022812	347.8692416	0.191365263	0.107631645	1.777964682	0.075409656	0.282072368
WBGene00077762	18062.23499	-0.179768973	0.101424167	-1.772447132	0.076320364	0.282072368
WBGene00164985	1324.391114	-0.200192763	0.11266682	-1.776856416	0.075591867	0.282072368
WBGene00194794	275.31445	0.25878056	0.145963007	1.772918799	0.076242163	0.282072368
WBGene00195060	311.4667857	-0.263287258	0.14866513	-1.771008831	0.076559233	0.282072368
WBGene00012854	3073.735258	-0.175073473	0.098889242	-1.770399582	0.076660599	0.282196707
WBGene00022376	410.7730295	0.213529499	0.120619167	1.77027835	0.076680783	0.282196707
WBGene00003785	1253.296103	0.213376842	0.120574541	1.769667466	0.076782553	0.282334744
WBGene00022830	869.240184	0.160014	0.09042571	1.769563103	0.07679995	0.282334744
WBGene00014944	387.7809016	-0.233952095	0.132272715	-1.768710156	0.076942256	0.282658614
WBGene00021811	167.1386315	0.218191068	0.123373192	1.768545213	0.076969801	0.282658614
WBGene00000407	415.5258774	-0.206365809	0.116741283	-1.767719214	0.077107856	0.282741291
WBGene00000474	614.6019324	0.153166085	0.086679976	1.767029617	0.077223268	0.282741291
WBGene00003224	462.6227906	0.240607677	0.136232424	1.766155735	0.077369725	0.282741291
WBGene00008410	383.6043047	0.16861393	0.095378177	1.767846	0.077086652	0.282741291
WBGene00012903	322.1244494	0.208780435	0.118173825	1.766723167	0.077274601	0.282741291
WBGene00013558	1252.586717	0.236933062	0.134166103	1.765968134	0.077401195	0.282741291
WBGene00015238	901.6753759	-0.195737666	0.110776038	-1.766967564	0.077233661	0.282741291
WBGene00015418	1809.136074	0.156842893	0.088804905	1.766151237	0.077370479	0.282741291
WBGene00016824	125.4667218	0.241284234	0.13662318	1.766056346	0.077386396	0.282741291
WBGene00021531	4205.256477	-0.210433422	0.119112187	-1.766682549	0.077281408	0.282741291
WBGene00001523	1253.187642	-0.178133241	0.100892018	-1.765583102	0.077465817	0.282827944
WBGene00001740	148.2049538	0.218397322	0.123717719	1.765287331	0.077515488	0.282859946
WBGene00021095	1733.72612	-0.185518664	0.105124521	-1.764751566	0.077605528	0.283039149
WBGene00001999	1728.406448	0.20681258	0.117236532	1.764062582	0.077721443	0.283312483
WBGene00007333	637.5660267	0.226617307	0.128490317	1.763691711	0.077783897	0.283390754
WBGene00011311	374.878306	0.20930324	0.118758759	1.762423609	0.077997753	0.284020252
WBGene00010905	129.947753	0.242561823	0.137733747	1.761092165	0.078222805	0.284645892
WBGene00016277	1500.142223	0.240973268	0.136845074	1.760920303	0.078251893	0.284645892
WBGene00017106	2020.14462	-0.19739275	0.112117436	-1.760589227	0.078307953	0.284700051
WBGene00003059	440.1282169	0.249024525	0.141463666	1.76034266	0.078349725	0.284702233
WBGene00022308	15829.51935	-0.186954818	0.106225204	-1.759985483	0.078410268	0.284772586
WBGene00000413	907.9467065	0.195885955	0.111446005	1.757675876	0.078802675	0.284908557
WBGene00001005	371.796113	0.19749852	0.112427614	1.756672691	0.078973615	0.284908557
WBGene00001488	12177.4846	-0.18307459	0.104195234	-1.757034206	0.078911979	0.284908557
WBGene00003415	595.6279027	0.183204433	0.104317317	1.756222634	0.079050401	0.284908557
WBGene00003829	1111.924298	0.168362067	0.095863	1.75627788	0.079040972	0.284908557
WBGene00007554	725.6582476	0.232766448	0.132612301	1.755240246	0.079218223	0.284908557
WBGene00007867	110.9828039	-0.229203122	0.13045422	-1.756962107	0.078924268	0.284908557
WBGene00007952	935.0047808	0.135856966	0.077365639	1.756037526	0.079082001	0.284908557
WBGene00008429	681.2944042	0.234851681	0.133805795	1.755168234	0.079230536	0.284908557
WBGene00008431	155.5015702	0.221048883	0.125749383	1.757852623	0.078772589	0.284908557
WBGene00009289	370.1530724	0.220353006	0.125449171	1.756512254	0.079000981	0.284908557
WBGene00010974	110.6146709	-0.280531471	0.159781919	-1.755714741	0.079137129	0.284908557
WBGene00013612	467.9480448	-0.177707971	0.10116355	-1.756640319	0.078979136	0.284908557
WBGene00015486	869.5766281	0.245412769	0.139742041	1.756184229	0.079056957	0.284908557
WBGene00015746	302.4513771	0.192254932	0.109520298	1.755427405	0.079186228	0.284908557
WBGene00016158	549.0146836	0.200801522	0.114296682	1.756844716	0.078944281	0.284908557
WBGene00018317	836.1943612	0.139051099	0.079091424	1.758105898	0.078729492	0.284908557
WBGene00020457	6416.300341	-0.146240592	0.083256542	-1.756505715	0.079002096	0.284908557
WBGene00021269	588.7122495	-0.145922373	0.083081135	-1.756383946	0.079022872	0.284908557
WBGene00000464	339.914064	0.226404898	0.129055758	1.754318455	0.079375955	0.28502655
WBGene00006736	1215.879906	0.212971162	0.121402699	1.75425394	0.079387004	0.28502655
WBGene00020103	246.019933	0.234574175	0.133701685	1.754459374	0.079351825	0.28502655
WBGene00003060	1932.544274	0.177349267	0.10118046	1.752801549	0.079636077	0.285195637
WBGene00003835	295.2612532	0.209751941	0.119717547	1.752056788	0.079764044	0.285195637
WBGene00004306	1951.290869	-0.157855501	0.09003495	-1.753269154	0.079555818	0.285195637
WBGene00011066	996.3848296	-0.150386777	0.085788369	-1.752997279	0.079602474	0.285195637
WBGene00012560	141.599632	-0.231808412	0.132279412	-1.752414892	0.079702493	0.285195637
WBGene00012928	633.2007747	0.233904085	0.133451654	1.752725263	0.079649177	0.285195637
WBGene00015188	541.7571239	0.190580055	0.10869965	1.75327203	0.079555324	0.285195637
WBGene00044811	145.0926484	-0.243151513	0.138780038	-1.75206403	0.079762799	0.285195637
WBGene00019167	987.3109882	-0.197225084	0.11262419	-1.751178714	0.079915131	0.285440666
WBGene00019890	301.972865	0.232712969	0.132879872	1.751303382	0.079893666	0.285440666
WBGene00001689	3072.835072	0.253586483	0.144834351	1.7508725	0.079967875	0.285481597
WBGene00004338	412.5839419	0.210708361	0.120403499	1.75001859	0.080115106	0.285712201
WBGene00020678	549.0633272	-0.230397027	0.131643932	-1.750153033	0.080091911	0.285712201
WBGene00007093	699.880534	0.149529143	0.085476996	1.74934954	0.080230618	0.285829325
WBGene00009187	122.3051563	0.218893127	0.125123832	1.749411947	0.080219837	0.285829325
WBGene00009452	412.3186395	0.241774012	0.13822837	1.749091105	0.080275273	0.285841148
WBGene00000156	1388.391674	0.196223698	0.112257494	1.747978609	0.080467732	0.285988142
WBGene00010243	4461.479308	-0.17785316	0.101760156	-1.747768158	0.080504181	0.285988142
WBGene00011449	788.7088574	-0.140870011	0.080605042	-1.747657558	0.080523342	0.285988142
WBGene00017264	5351.506198	-0.164955302	0.094378903	-1.747798461	0.080498932	0.285988142
WBGene00021901	404.6454544	0.20530303	0.117460152	1.747852581	0.080489558	0.285988142
WBGene00011043	1132.131784	0.242279588	0.138652662	1.747385048	0.080570569	0.286008977
WBGene00011648	542.5129276	0.155645326	0.089104407	1.746774728	0.080676422	0.286237793
WBGene00012368	258.5296563	-0.23209528	0.132891812	-1.746497976	0.080724458	0.286261349
WBGene00002231	2963.340873	0.223805935	0.128235407	1.745274104	0.080937167	0.286721574
WBGene00020839	506.4120238	0.176092563	0.100893893	1.745324292	0.080928436	0.286721574
WBGene00000796	1308.490569	0.175019701	0.100344991	1.744179751	0.081127751	0.287001767
WBGene00004371	1523.729375	0.208036498	0.119287765	1.743988575	0.081161082	0.287001767
WBGene00006307	1356.279019	0.218204027	0.125092178	1.744345885	0.081098795	0.287001767
WBGene00021839	338.7669992	-0.2335306	0.133915371	-1.743867031	0.081182279	0.287001767
WBGene00021667	1139.835675	0.18309539	0.1050353	1.743179587	0.08130225	0.287279028
WBGene00002998	1305.770446	0.245833636	0.141102312	1.742236761	0.081467024	0.287539491
WBGene00008330	127.5796142	0.243004648	0.13951299	1.741806602	0.081542291	0.287539491
WBGene00010028	161.3203003	-0.259439394	0.148948355	-1.741807714	0.081542096	0.287539491
WBGene00020166	639.2886711	0.188142477	0.107993805	1.742159913	0.081480466	0.287539491
WBGene00008118	354.7355534	0.207085785	0.118958115	1.740829403	0.081713486	0.287943348
WBGene00017759	325.4179665	0.176081118	0.10115665	1.740677638	0.0817401	0.287943348
WBGene00004889	835.1068686	-0.174328746	0.100176464	-1.740216598	0.081820992	0.287948727
WBGene00016140	1463.016095	0.20366274	0.117050438	1.739957103	0.081866551	0.287948727
WBGene00020035	3147.272944	0.231357191	0.132949168	1.740192842	0.081825162	0.287948727
WBGene00013209	483.8804065	0.190948122	0.109765944	1.739593495	0.081930422	0.288026879
WBGene00002363	810.0277497	0.216213623	0.124319666	1.739174751	0.082004029	0.288139158
WBGene00015641	389.6372571	0.222211055	0.1278322	1.738302683	0.082157494	0.288531778
WBGene00008430	1233.277949	0.205357464	0.118169926	1.737814947	0.082243426	0.288585738
WBGene00018835	361.3279318	-0.193537088	0.111372755	-1.737741769	0.082256325	0.288585738
WBGene00016264	627.2484898	-0.173504708	0.099862982	-1.737427662	0.082311712	0.288633616
WBGene00002244	584.871867	0.189560242	0.109169352	1.736386981	0.082495433	0.288896109
WBGene00009179	270.9600885	0.204172878	0.117578408	1.736482758	0.08247851	0.288896109
WBGene00013156	6524.919179	0.256745527	0.147869866	1.736293773	0.082511904	0.288896109
WBGene00008331	722.7447383	0.134217127	0.077314526	1.735988487	0.08256587	0.288938762
WBGene00001856	693.5356489	0.207420029	0.119552246	1.734973924	0.082745424	0.289009166
WBGene00007417	243.4093354	-0.241958407	0.13944292	-1.735178861	0.08270913	0.289009166
WBGene00012096	1990.112652	-0.204850495	0.118046845	-1.735332233	0.082681976	0.289009166
WBGene00017079	1052.080313	0.23539596	0.135698812	1.734694329	0.082794961	0.289009166
WBGene00017828	2286.299683	-0.171972173	0.099126503	-1.734875807	0.082762805	0.289009166
WBGene00000846	358.9068757	0.203737287	0.117545687	1.733260421	0.083049392	0.289021916
WBGene00015136	140.2776154	-0.213405416	0.12310933	-1.733462575	0.083013484	0.289021916
WBGene00015697	305.1786286	0.206434655	0.119086548	1.733484256	0.083009634	0.289021916
WBGene00016236	1020.786362	0.223091692	0.128654518	1.734036989	0.08291152	0.289021916
WBGene00017162	926.967219	0.254326197	0.146695109	1.733706044	0.082970254	0.289021916
WBGene00022349	1211.59158	-0.168671975	0.097291968	-1.733668031	0.082977002	0.289021916
WBGene00013160	641.8655104	0.153333262	0.088487774	1.732818613	0.083127914	0.289149659
WBGene00016291	666.1751917	0.218040798	0.125869563	1.7322758	0.083224469	0.28933997
WBGene00017547	447.4869398	0.195984926	0.113155934	1.731989825	0.083275374	0.289371463
WBGene00013327	233.5737698	-0.185007548	0.10683976	-1.731635753	0.083338436	0.289445146
WBGene00011032	607.176482	0.213257326	0.123171253	1.731388786	0.083382445	0.289452616
WBGene00006351	298.7905854	-0.20300097	0.117274847	-1.730984735	0.083454487	0.28955734
WBGene00008995	483.3925202	0.240389705	0.138901025	1.73065466	0.083513376	0.289616348
WBGene00003789	1875.80392	0.192272669	0.111153712	1.729790804	0.083667658	0.28973666
WBGene00004468	845.8967161	0.148224591	0.085691587	1.729744971	0.08367585	0.28973666
WBGene00007697	108.4962416	-0.230359905	0.133174585	-1.729758764	0.083673385	0.28973666
WBGene00010232	1163.279604	0.238694848	0.138015468	1.72947895	0.083723411	0.28973666
WBGene00017620	338.6316875	-0.185152432	0.107068594	-1.729287973	0.083757568	0.28973666
[truncated: 43,648 more rows]
