# Supplementary material for: Stress resets ancestral heritable small RNA responses
Source: eLife journal article supplement (doi:10.7554/elife.65797), 2021-03-16
Supplement: supp [file elife-65797-supp-v1.zip › elife_poa_e65797_Supplementary_file_2.csv]

	baseMean	log2FoldChange	lfcSE	stat	pvalue	padj
WBGene00001785	34.93150481	0.680303741	0.156928558	4.335117525	1.46E-05	0.071808748
WBGene00007523	117.9037668	0.671401843	0.156664938	4.285590981	1.82E-05	0.071808748
WBGene00009863	355.9096423	0.700043953	0.151680062	4.615266798	3.93E-06	0.071808748
WBGene00169594	42.49062508	0.651962283	0.154315171	4.224874838	2.39E-05	0.071808748
WBGene00200337	1046.779516	-0.420769118	0.097326275	-4.323283913	1.54E-05	0.071808748
WBGene00201655	1852.541359	-0.65839163	0.155394688	-4.236899202	2.27E-05	0.071808748
WBGene00235367	77.25316434	-0.477733949	0.106246872	-4.496451873	6.91E-06	0.071808748
WBGene00269431	1765.969779	0.648986389	0.152435436	4.257450915	2.07E-05	0.071808748
WBGene00018011	554.0044406	-0.369624746	0.090139133	-4.100602423	4.12E-05	0.099017742
WBGene00219756	543.2070353	0.645571766	0.156545398	4.123862938	3.73E-05	0.099017742
WBGene00003354	82.97629334	0.603761382	0.156829086	3.849804885	0.000118212	0.236709589
WBGene00006384	915.9523396	-0.324908171	0.084237841	-3.857033456	0.000114771	0.236709589
WBGene00236807	25.11971169	0.587856562	0.153730064	3.823953153	0.000131329	0.242746279
WBGene00016553	238.8514448	0.591993413	0.156442914	3.784085817	0.000154275	0.264790293
WBGene00001666	719.9396837	0.330634546	0.089103991	3.710659217	0.00020672	0.331152031
WBGene00000207	660.6438184	-0.351213409	0.095549574	-3.675719261	0.00023718	0.356200239
WBGene00016520	337.8597735	0.561297346	0.155353922	3.613023331	0.000302647	0.427783284
WBGene00000368	255.3270578	-0.438803596	0.123567675	-3.551119639	0.000383596	0.512079354
WBGene00219443	920.4147839	0.554941194	0.156925983	3.536324477	0.000405736	0.513127934
WBGene00001131	1358.120292	-0.314261331	0.089447775	-3.513349919	0.000442494	0.531634793
WBGene00010362	4441.801428	-0.295381014	0.085269516	-3.464086901	0.000532035	0.594771063
WBGene00195031	63.17322282	0.536814085	0.155246032	3.457828055	0.000544549	0.594771063
WBGene00015321	719.9456615	0.536857944	0.156318717	3.434380429	0.00059391	0.620481049
WBGene00012552	2205.559271	-0.323652912	0.094723622	-3.416813084	0.000633588	0.63435323
WBGene00003582	905.2933082	-0.263030476	0.07765942	-3.386974511	0.00070668	0.635512534
WBGene00006745	92.38035108	-0.470797694	0.139120011	-3.384111974	0.000714089	0.635512534
WBGene00016072	4392.012951	-0.256624191	0.075416324	-3.402767153	0.000667071	0.635512534
WBGene00010481	15.4457639	0.508002362	0.153469184	3.310126176	0.000932539	0.747802628
WBGene00018204	2101.956592	0.519515374	0.156962749	3.309800422	0.000933625	0.747802628
WBGene00219687	1094.595297	0.514496677	0.155353245	3.311785837	0.000927025	0.747802628
WBGene00020471	62.76014571	-0.467001337	0.143876968	-3.245838046	0.001171054	0.907718255
WBGene00000001	422.0058991	-0.173965131	0.081410224	-2.136895371	0.032606503	0.99718055
WBGene00000002	1.545269811	0.058798714	0.08566261	0.686398814	0.492461652	0.99718055
WBGene00000003	1.888144447	0.003959823	0.078796093	0.050254059	0.959919933	0.99718055
WBGene00000004	19.5755286	-0.003726116	0.152011799	-0.024512015	0.9804442	0.99718055
WBGene00000005	5.642402248	-0.091163983	0.115752957	-0.78757369	0.430946109	0.99718055
WBGene00000006	5.043368052	-0.031414514	0.126755611	-0.24783529	0.804261849	0.99718055
WBGene00000007	4.104728922	-0.083408804	0.11469868	-0.727199341	0.46710385	0.99718055
WBGene00000008	0.141719548	0.004261962	0.027179963	0.156805309	0.875398289	0.99718055
WBGene00000009	1.508452255	-0.077700299	0.084361574	-0.921038994	0.357030069	0.99718055
WBGene00000010	219.4647316	0.283046192	0.101026162	2.80171182	0.005083226	0.99718055
WBGene00000012	0.154641749	-0.005423572	0.027179963	-0.199543013	0.841838	0.99718055
WBGene00000013	0.171726672	0.004261962	0.027179963	0.156805309	0.875398289	0.99718055
WBGene00000015	0.175313015	-0.005423572	0.027179963	-0.199543013	0.841838	0.99718055
WBGene00000016	0.350626031	-0.010266327	0.027179963	-0.377716742	0.705641029	0.99718055
WBGene00000017	0.254029659	0.006683352	0.027179963	0.245892606	0.805765368	0.99718055
WBGene00000018	27.90787423	0.179239061	0.156889502	1.14245414	0.253265298	0.99718055
WBGene00000019	66.66131109	-0.012209754	0.145115709	-0.084138062	0.932946663	0.99718055
WBGene00000020	27.5769363	-0.075060899	0.156801406	-0.478700421	0.632151767	0.99718055
WBGene00000021	14.47322647	-0.229976243	0.127985948	-1.796886664	0.072353614	0.99718055
WBGene00000022	29.84499276	-0.14242763	0.156234125	-0.91162945	0.361963814	0.99718055
WBGene00000023	27.07405362	-0.283286417	0.156854226	-1.806048991	0.070910687	0.99718055
WBGene00000025	0.522224643	0.02629694	0.037134526	0.708153371	0.478850019	0.99718055
WBGene00000027	0.349572417	-0.000917117	0.034079771	-0.026910905	0.978530795	0.99718055
WBGene00000028	0.388716194	0.011815825	0.027193966	0.434501718	0.663924147	0.99718055
WBGene00000029	0.232416489	-0.02237325	0.027179963	-0.823152362	0.410421355	0.99718055
WBGene00000030	0.482828304	0.031729104	0.041584745	0.762998645	0.445464204	0.99718055
WBGene00000031	21.63636724	-0.148046575	0.148662413	-0.995857474	0.3193194	0.99718055
WBGene00000032	0.165427147	0.004261962	0.027179963	0.156805309	0.875398289	0.99718055
WBGene00000033	0.575511884	0.026827958	0.03713305	0.722481947	0.469998221	0.99718055
WBGene00000034	1.539047512	0.070168835	0.077882757	0.900954692	0.36761241	0.99718055
WBGene00000035	0.867896936	-0.036063338	0.04700967	-0.767147221	0.442993989	0.99718055
WBGene00000036	5.764947086	-0.151716807	0.127219831	-1.19255627	0.233043201	0.99718055
WBGene00000037	6.566176188	0.031331867	0.12989714	0.24120521	0.809396073	0.99718055
WBGene00000038	4.613198577	-0.18311246	0.119676218	-1.530065569	0.1260005	0.99718055
WBGene00000039	128.3925966	0.069124848	0.130390011	0.530139137	0.596015465	0.99718055
WBGene00000040	54.74301065	-0.048996362	0.146674105	-0.334049161	0.738342462	0.99718055
WBGene00000041	728.0073642	0.088579445	0.097321991	0.910168862	0.362733463	0.99718055
WBGene00000042	0.73302004	0.003976374	0.038689345	0.102776968	0.918139985	0.99718055
WBGene00000043	0.136302203	-0.005423572	0.027179963	-0.199543013	0.841838	0.99718055
WBGene00000044	21.23381535	0.067522864	0.145537295	0.463955742	0.642679455	0.99718055
WBGene00000045	14.03931549	0.148771827	0.150940583	0.985631728	0.324313863	0.99718055
WBGene00000046	24.62238961	-0.154557451	0.156105935	-0.990080557	0.322134746	0.99718055
WBGene00000047	0.357690871	0.014547975	0.034277271	0.424420468	0.671259196	0.99718055
WBGene00000048	83.77171301	0.23930725	0.154079283	1.553143589	0.120388835	0.99718055
WBGene00000049	1.063220463	0.010735972	0.066054206	0.162532761	0.870886332	0.99718055
WBGene00000050	7.976456209	0.038663744	0.142348352	0.271613571	0.785919164	0.99718055
WBGene00000051	2.558482533	-0.046840482	0.105020944	-0.44601087	0.655589394	0.99718055
WBGene00000053	0.72644221	-0.025504955	0.054965824	-0.464014789	0.64263715	0.99718055
WBGene00000054	0.770108728	0.005794138	0.050484	0.114771766	0.908626028	0.99718055
WBGene00000055	11.41896832	-0.142010377	0.152579347	-0.930731318	0.351992565	0.99718055
WBGene00000056	110.864093	0.128590582	0.137503114	0.93518305	0.349693972	0.99718055
WBGene00000057	36.49851461	-0.144006386	0.154538504	-0.931847937	0.351415117	0.99718055
WBGene00000058	0.553096806	0.039925754	0.045180242	0.883699427	0.376858489	0.99718055
WBGene00000059	10.55652451	-0.072620101	0.141358204	-0.513731069	0.607440027	0.99718055
WBGene00000060	0.438544111	0.006020658	0.035777945	0.168278485	0.866364199	0.99718055
WBGene00000061	0.903181089	0.019519366	0.058293763	0.334844847	0.737742129	0.99718055
WBGene00000062	1.819683365	-0.028823744	0.084171288	-0.342441522	0.732018646	0.99718055
WBGene00000063	51.01168213	0.005612118	0.152393517	0.03682649	0.970623353	0.99718055
WBGene00000064	631.3796777	0.137187895	0.08995557	1.525062815	0.127243431	0.99718055
WBGene00000065	94.40434608	0.299600258	0.152069982	1.970147251	0.048821497	0.99718055
WBGene00000066	98.24869927	0.028046917	0.126969564	0.220894806	0.825174342	0.99718055
WBGene00000067	6.577015365	-0.02989442	0.133563625	-0.223821568	0.822896147	0.99718055
WBGene00000068	95.1429704	-0.032101603	0.144137684	-0.222714851	0.823757442	0.99718055
WBGene00000069	6.443629	-0.113543853	0.133810395	-0.848542838	0.396135726	0.99718055
WBGene00000070	8.506602747	0.009610636	0.138756695	0.0692625	0.944780675	0.99718055
WBGene00000071	2.471751942	0.032771482	0.09827542	0.333465705	0.738782773	0.99718055
WBGene00000072	2.635757057	0.112421676	0.102672621	1.094952818	0.273537308	0.99718055
WBGene00000073	107.0832335	0.029759353	0.15675503	0.189846241	0.84942962	0.99718055
WBGene00000074	44.68902251	0.048494632	0.154897936	0.313074746	0.754223875	0.99718055
WBGene00000075	531.8472296	-0.229076598	0.147748783	-1.550446596	0.121034362	0.99718055
WBGene00000080	509.1675074	0.063507883	0.100010951	0.635009288	0.525422358	0.99718055
WBGene00000081	5479.494103	-0.006241908	0.130994661	-0.047650096	0.961995106	0.99718055
WBGene00000082	1.509758022	-0.152653139	0.083505886	-1.828052454	0.06754168	0.99718055
WBGene00000083	4.581615435	-0.141288737	0.122606165	-1.152378732	0.249165477	0.99718055
WBGene00000084	6.772576761	0.043283547	0.118803817	0.364327915	0.715613157	0.99718055
WBGene00000085	0.409147543	0.00395691	0.040980253	0.096556508	0.923078596	0.99718055
WBGene00000086	5.771802161	0.113685893	0.116958543	0.972018717	0.331041237	0.99718055
WBGene00000088	22.58431691	-0.06350461	0.156813046	-0.404970193	0.685499421	0.99718055
WBGene00000089	7326.234026	-0.059614758	0.122061685	-0.488398614	0.625267523	0.99718055
WBGene00000090	424.309918	0.088571363	0.101540715	0.872274367	0.383058718	0.99718055
WBGene00000092	20.32953673	0.136681164	0.156659013	0.872475581	0.382948984	0.99718055
WBGene00000093	137.49391	-0.043587715	0.123874731	-0.351869299	0.724936284	0.99718055
WBGene00000094	74.00002602	-0.078484338	0.137087835	-0.572511324	0.566975616	0.99718055
WBGene00000095	38.65370609	0.041767151	0.151071346	0.276473016	0.782184783	0.99718055
WBGene00000096	33.99749094	0.08118359	0.152608555	0.531972733	0.594744881	0.99718055
WBGene00000097	554.9417339	0.014308322	0.118635414	0.120607511	0.904001919	0.99718055
WBGene00000098	311.5838884	0.123842917	0.089436115	1.384708156	0.166141724	0.99718055
WBGene00000099	966.2130263	0.070970823	0.109021961	0.650977308	0.515061136	0.99718055
WBGene00000100	87.20850643	-0.21497182	0.149970571	-1.433426695	0.151735934	0.99718055
WBGene00000101	582.0472437	0.194055303	0.071288319	2.722119218	0.006486474	0.99718055
WBGene00000102	432.6118428	0.030125071	0.095314413	0.316059973	0.751956988	0.99718055
WBGene00000103	59.91406914	-0.041561765	0.156255455	-0.265986012	0.790249982	0.99718055
WBGene00000105	123.5708483	-0.023749647	0.132288088	-0.179529747	0.857521762	0.99718055
WBGene00000106	107.334079	0.043352411	0.145399096	0.29816149	0.765579913	0.99718055
WBGene00000107	99.15435713	0.031033933	0.122037089	0.254299188	0.799264427	0.99718055
WBGene00000108	0.918190557	0.013079604	0.062795618	0.208288489	0.835003719	0.99718055
WBGene00000109	965.1386104	0.049429039	0.125584435	0.393592083	0.693882228	0.99718055
WBGene00000110	506.7093318	0.060248075	0.124164479	0.485227945	0.627514661	0.99718055
WBGene00000111	42.37827085	-0.073581936	0.149064958	-0.493623294	0.621572247	0.99718055
WBGene00000112	864.5409421	-0.225572174	0.108269922	-2.083424185	0.037212576	0.99718055
WBGene00000113	173.1334449	0.127520531	0.156671795	0.813934189	0.415682653	0.99718055
WBGene00000114	280.068448	0.030184607	0.115624609	0.261056942	0.794048596	0.99718055
WBGene00000115	1842.049319	0.030525898	0.113495265	0.268961864	0.78795903	0.99718055
WBGene00000116	2.731908853	0.113973319	0.089542386	1.272842103	0.203074078	0.99718055
WBGene00000117	158.4448319	0.068618406	0.114550237	0.599024566	0.549156503	0.99718055
WBGene00000118	3.046557676	-0.026147962	0.106804406	-0.244821	0.806595033	0.99718055
WBGene00000120	26.22078039	0.217995816	0.156698028	1.391184175	0.164169585	0.99718055
WBGene00000121	291.365818	-0.032356926	0.126758763	-0.255263819	0.798519343	0.99718055
WBGene00000123	3489.933313	0.01244457	0.114552313	0.108636564	0.913490758	0.99718055
WBGene00000133	0.671695871	0.018581352	0.049109146	0.378368453	0.7051569	0.99718055
WBGene00000134	3.220490896	-0.018628924	0.106022246	-0.175707693	0.860523591	0.99718055
WBGene00000135	0.524847113	0.017895941	0.030786261	0.581296342	0.561040745	0.99718055
WBGene00000136	8.460140132	0.061474728	0.14266124	0.430914013	0.666530894	0.99718055
WBGene00000137	14.27256331	-0.022294984	0.151978323	-0.146698449	0.883370043	0.99718055
WBGene00000138	14.728299	-0.05575417	0.147135721	-0.378930211	0.704739689	0.99718055
WBGene00000139	3.196611178	-0.096023304	0.109889413	-0.873817603	0.382217593	0.99718055
WBGene00000140	2245.639981	0.142075558	0.0988669	1.437038672	0.150707005	0.99718055
WBGene00000142	246.2606157	0.060385279	0.107462701	0.5619185	0.574171549	0.99718055
WBGene00000143	247.4332518	0.114357044	0.106759974	1.071160276	0.28409737	0.99718055
WBGene00000144	131.4894818	0.02477386	0.134992534	0.183520226	0.85438985	0.99718055
WBGene00000145	131.1399674	0.08796244	0.117063877	0.751405489	0.45240866	0.99718055
WBGene00000146	458.4953719	0.131529903	0.11544469	1.13933264	0.25456444	0.99718055
WBGene00000147	243.6852144	-0.043441049	0.109339035	-0.397305947	0.691141862	0.99718055
WBGene00000148	297.2744052	0.132979998	0.099202983	1.340483854	0.18008809	0.99718055
WBGene00000149	7.253489448	-0.057179483	0.141553307	-0.40394311	0.686254554	0.99718055
WBGene00000150	3.889345587	-0.071037147	0.118694072	-0.598489428	0.549513411	0.99718055
WBGene00000151	496.6215824	-0.067638875	0.096127988	-0.703633527	0.481661026	0.99718055
WBGene00000155	861.8451695	0.07115668	0.12967794	0.548718461	0.583198675	0.99718055
WBGene00000156	1069.148861	0.070300891	0.095701976	0.734581399	0.46259447	0.99718055
WBGene00000157	75.63121912	-0.068396927	0.153292839	-0.446184748	0.655463799	0.99718055
WBGene00000158	686.4201439	0.097062425	0.126124188	0.769578199	0.441550141	0.99718055
WBGene00000160	606.8820481	0.095937916	0.084404566	1.136643678	0.255687273	0.99718055
WBGene00000161	86.35091402	0.015738747	0.145968814	0.107822667	0.914136362	0.99718055
WBGene00000162	470.7761007	0.023570133	0.101291461	0.232696147	0.815997362	0.99718055
WBGene00000163	279.6898432	0.019744258	0.108183282	0.182507479	0.855184486	0.99718055
WBGene00000164	14.99452605	-0.175662753	0.151378244	-1.16042271	0.245876745	0.99718055
WBGene00000165	102.9204231	-0.0889529	0.123149668	-0.722315389	0.470100594	0.99718055
WBGene00000166	0.543590945	0.015593914	0.048253226	0.323168326	0.746567767	0.99718055
WBGene00000168	158.3721106	0.137213261	0.114552284	1.197822125	0.230986272	0.99718055
WBGene00000169	4.535275318	-0.035412698	0.111484189	-0.317647719	0.750752173	0.99718055
WBGene00000170	12.04204479	-0.178145697	0.141200693	-1.261648892	0.207075155	0.99718055
WBGene00000171	0.145305891	-0.005423572	0.027179963	-0.199543013	0.841838	0.99718055
WBGene00000172	9.267391758	0.086196589	0.120279263	0.716637162	0.473598008	0.99718055
WBGene00000174	0.153797021	-0.015109106	0.027179963	-0.555891336	0.578285141	0.99718055
WBGene00000175	9.24761121	-0.065624727	0.121147702	-0.541691883	0.588030783	0.99718055
WBGene00000177	370.6712809	0.050141113	0.141831749	0.353525311	0.723694657	0.99718055
WBGene00000178	190.7154529	-0.236350424	0.139774284	-1.690943551	0.090847584	0.99718055
WBGene00000179	4.906376703	-0.126093958	0.119252952	-1.05736551	0.290344806	0.99718055
WBGene00000180	4.148005311	0.084002644	0.115483176	0.727401573	0.466979991	0.99718055
WBGene00000181	46.92319883	-0.065849635	0.152378525	-0.432145117	0.665635945	0.99718055
WBGene00000182	471.0419388	0.137656072	0.086146607	1.597927965	0.11005901	0.99718055
WBGene00000183	374.1556487	0.064662018	0.10672304	0.605886209	0.544590318	0.99718055
WBGene00000184	368.5442403	0.096306369	0.085685894	1.123946604	0.261035679	0.99718055
WBGene00000185	11.97590038	-0.16216465	0.144456999	-1.122580779	0.261615582	0.99718055
WBGene00000186	943.1771788	-0.093189921	0.104988624	-0.887619221	0.374745611	0.99718055
WBGene00000187	103.5444939	0.098238078	0.129327495	0.759607062	0.447489497	0.99718055
WBGene00000188	2.220307963	0.104872379	0.09511975	1.10253001	0.270231319	0.99718055
WBGene00000189	35.3656948	0.238679796	0.151070938	1.579918675	0.114125492	0.99718055
WBGene00000190	11.97709848	0.018385964	0.152355141	0.120678328	0.903945825	0.99718055
WBGene00000191	4.52672002	0.096345778	0.114110883	0.844317174	0.398492192	0.99718055
WBGene00000192	399.7151891	0.043891431	0.09338979	0.46998104	0.638368563	0.99718055
WBGene00000193	0.137146931	0.004261962	0.027179963	0.156805309	0.875398289	0.99718055
WBGene00000195	41.17917336	0.016805035	0.14955133	0.112369682	0.910530294	0.99718055
WBGene00000196	699.5999607	-0.191811114	0.075268414	-2.548361316	0.010823031	0.99718055
WBGene00000197	3606.375537	-0.03826724	0.120539535	-0.317466297	0.750889809	0.99718055
WBGene00000198	232.6277083	-0.052097243	0.105351402	-0.494509247	0.620946578	0.99718055
WBGene00000199	307.6738912	0.010849789	0.100819734	0.107615728	0.91430052	0.99718055
WBGene00000200	273.1784163	-0.028000247	0.104349208	-0.268332145	0.788443665	0.99718055
WBGene00000201	312.8653346	0.179946044	0.11082024	1.623765159	0.104425939	0.99718055
WBGene00000202	134.2955562	0.009764904	0.122998092	0.079390696	0.936721868	0.99718055
WBGene00000203	174.6696197	0.070563864	0.114013965	0.618905447	0.53597865	0.99718055
WBGene00000204	475.0694715	0.036584759	0.094329167	0.387841425	0.698133388	0.99718055
WBGene00000205	140.1198947	0.071015941	0.119038635	0.596578929	0.550788543	0.99718055
WBGene00000206	114.6000928	0.083553988	0.126797766	0.658954732	0.509924838	0.99718055
WBGene00000208	192.5927965	-0.12258609	0.117810947	-1.040532257	0.298092686	0.99718055
WBGene00000209	147.2287663	0.132271079	0.132750922	0.996385391	0.319062929	0.99718055
WBGene00000210	202.6078284	-0.219127688	0.136242862	-1.60836087	0.107756166	0.99718055
WBGene00000211	2.230458742	-0.016676929	0.090463787	-0.184349229	0.853739496	0.99718055
WBGene00000212	3.925329071	-0.075767789	0.109066026	-0.694696523	0.487245508	0.99718055
WBGene00000213	65.86795652	0.139362944	0.147065857	0.947622698	0.343321567	0.99718055
WBGene00000214	26.61619249	0.174825454	0.15678083	1.115094582	0.264809893	0.99718055
WBGene00000215	10.094205	0.117360999	0.137166731	0.85560834	0.392214456	0.99718055
WBGene00000216	8.854659391	0.068483576	0.139658974	0.49036287	0.623877146	0.99718055
WBGene00000217	27.66265886	0.056606262	0.141846726	0.399066397	0.689844281	0.99718055
WBGene00000218	7.204525722	0.007768139	0.122875763	0.063219457	0.949591751	0.99718055
WBGene00000219	30.19940013	0.168721613	0.156920647	1.075203401	0.282283673	0.99718055
WBGene00000220	0.650990733	-0.017001604	0.044195333	-0.38469229	0.700465408	0.99718055
WBGene00000221	845.4055847	0.073048437	0.138343355	0.528022734	0.597483557	0.99718055
WBGene00000222	348.7477469	-0.096908844	0.125713924	-0.770868017	0.440785166	0.99718055
WBGene00000223	479.5402629	0.122001982	0.113210363	1.077657369	0.28118669	0.99718055
WBGene00000224	185.604989	-0.00721101	0.142261021	-0.050688586	0.959573672	0.99718055
WBGene00000225	8.607322006	-0.105672245	0.137030275	-0.771159837	0.440612197	0.99718055
WBGene00000226	1619.715557	0.074180316	0.107988906	0.686925336	0.49212978	0.99718055
WBGene00000227	2223.676894	-0.035864725	0.065076344	-0.551117702	0.581552991	0.99718055
WBGene00000228	5.468532544	0.077444236	0.119454196	0.64831742	0.516779669	0.99718055
WBGene00000229	596.0052731	0.051635853	0.078878391	0.654626092	0.512708521	0.99718055
WBGene00000230	147.6615861	0.010462602	0.131311931	0.079677463	0.936493784	0.99718055
WBGene00000231	882.8889489	0.289405259	0.113048335	2.560013456	0.010466811	0.99718055
WBGene00000232	30.20097384	0.259065252	0.154589753	1.67582422	0.093772629	0.99718055
WBGene00000233	10.09457559	0.027406087	0.146707479	0.186807704	0.851811406	0.99718055
WBGene00000235	83.53792952	0.056744968	0.135898113	0.417555229	0.676272337	0.99718055
WBGene00000236	422.5904957	-0.050808571	0.080797699	-0.628836861	0.529455866	0.99718055
WBGene00000237	343.3863623	-0.172001626	0.134136762	-1.282285505	0.199742511	0.99718055
WBGene00000238	12.51814051	-0.101666037	0.149834278	-0.67852322	0.497440006	0.99718055
WBGene00000239	1.42437511	-0.046580407	0.077876227	-0.598133838	0.549750633	0.99718055
WBGene00000240	17.57334455	-0.215793616	0.127448152	-1.693187484	0.090419786	0.99718055
WBGene00000241	76.77121034	0.044976005	0.156526505	0.287337949	0.773853568	0.99718055
WBGene00000242	1.179941685	0.071082965	0.058400356	1.217166639	0.223540821	0.99718055
WBGene00000245	11.70793555	-0.016903005	0.148749524	-0.113634012	0.909527924	0.99718055
WBGene00000246	1.559723484	-0.047873244	0.068041728	-0.703586534	0.4816903	0.99718055
WBGene00000247	468.4578062	-0.028618117	0.121625264	-0.235297473	0.813977856	0.99718055
WBGene00000248	199.4699601	0.06302296	0.143827536	0.438184247	0.661252727	0.99718055
WBGene00000249	193.3311007	0.256251453	0.137096073	1.86913781	0.061603644	0.99718055
WBGene00000250	374.4003173	-0.0588339	0.080906672	-0.727182305	0.467114284	0.99718055
WBGene00000251	1.19649662	-0.013764854	0.067152497	-0.204979037	0.837588503	0.99718055
WBGene00000252	2.247559973	-0.061491306	0.096307008	-0.638492537	0.52315311	0.99718055
WBGene00000253	367.9743189	-0.121134468	0.115239515	-1.051153918	0.293187904	0.99718055
WBGene00000254	636.7003333	-0.067733781	0.096436174	-0.702369023	0.482449058	0.99718055
WBGene00000255	1.237917699	0.019413641	0.074016245	0.262288914	0.793098708	0.99718055
WBGene00000256	26.11389194	-0.095566614	0.15308385	-0.624276262	0.53244617	0.99718055
WBGene00000257	3218.651362	0.034327236	0.101721748	0.337462115	0.735768567	0.99718055
WBGene00000259	199.768408	0.061701234	0.121300239	0.508665393	0.610986783	0.99718055
WBGene00000262	309.3227967	-0.029815279	0.147613119	-0.20198258	0.839930343	0.99718055
WBGene00000263	30.79563902	0.027234809	0.15333202	0.17761984	0.859021542	0.99718055
WBGene00000264	675.1467	0.061720979	0.120309243	0.513019431	0.607937729	0.99718055
WBGene00000265	514.1129369	0.141663778	0.117048877	1.210295913	0.226165365	0.99718055
WBGene00000266	71.8201835	0.15586743	0.153853598	1.013089278	0.311017519	0.99718055
WBGene00000267	349.7739591	0.089992537	0.150581688	0.597632675	0.550085057	0.99718055
WBGene00000268	61.36591927	-0.00812071	0.13752025	-0.059051014	0.952911476	0.99718055
WBGene00000269	40.16938816	-0.017329516	0.153145536	-0.11315717	0.909905951	0.99718055
WBGene00000270	210.9427179	0.049767112	0.126062871	0.394780089	0.69300519	0.99718055
WBGene00000271	735.2858083	0.101465806	0.115829697	0.875991288	0.38103477	0.99718055
WBGene00000272	0.927131681	0.059893433	0.053905509	1.111081855	0.266533117	0.99718055
WBGene00000273	0.913627062	0.039228346	0.054188264	0.723926982	0.469110564	0.99718055
WBGene00000274	1556.227634	0.059108157	0.107646329	0.549095892	0.582939644	0.99718055
WBGene00000275	2683.815799	0.010360505	0.142634309	0.072636838	0.942095111	0.99718055
WBGene00000276	564.1887898	0.037182327	0.112846994	0.329493289	0.741782866	0.99718055
WBGene00000277	1.506638674	0.029921056	0.073452204	0.407354091	0.68374794	0.99718055
WBGene00000279	13.15065661	0.062999689	0.146973549	0.428646442	0.668180542	0.99718055
WBGene00000280	4.57356627	-0.03010178	0.104265181	-0.288704047	0.772807866	0.99718055
WBGene00000281	1.476877456	-0.015875614	0.072166473	-0.219986002	0.825882057	0.99718055
WBGene00000282	0.252211526	-0.012687716	0.027179963	-0.466804039	0.640640086	0.99718055
WBGene00000283	0.70866101	0.005092142	0.045516501	0.111874645	0.910922801	0.99718055
WBGene00000284	0.554831836	-0.005172606	0.042265549	-0.122383511	0.902595296	0.99718055
WBGene00000285	1.469593467	0.059194397	0.074934197	0.789951706	0.429555973	0.99718055
WBGene00000286	6.737302648	0.203282972	0.129021769	1.575571114	0.115124678	0.99718055
WBGene00000287	0.207429917	0.006683352	0.027179963	0.245892606	0.805765368	0.99718055
WBGene00000288	1.31467306	0.060908031	0.074533892	0.817185709	0.413822308	0.99718055
WBGene00000289	73.66167619	-0.108525982	0.137594164	-0.788739716	0.43026415	0.99718055
WBGene00000292	207.3750072	0.022034275	0.117013662	0.188305153	0.850637446	0.99718055
WBGene00000293	280.7285502	0.126658763	0.105847039	1.196620742	0.231454412	0.99718055
WBGene00000294	269.4563869	-0.220879589	0.152875909	-1.444829278	0.148505845	0.99718055
WBGene00000295	0.530541764	-0.026834344	0.043303401	-0.619682124	0.535467087	0.99718055
WBGene00000296	3.066947981	0.014050029	0.098965707	0.141968662	0.887104759	0.99718055
WBGene00000298	2.274949995	0.046208289	0.086526973	0.534033345	0.593318464	0.99718055
WBGene00000301	51.14420097	-0.048172565	0.142692729	-0.337596492	0.735667286	0.99718055
WBGene00000302	10.58253969	0.162004225	0.141724426	1.143093178	0.252999907	0.99718055
WBGene00000366	1664.366853	0.064743485	0.078717084	0.822483283	0.410801897	0.99718055
WBGene00000367	7.756910076	-0.265966553	0.132200314	-2.011845083	0.04423627	0.99718055
WBGene00000369	718.3116092	0.041096667	0.091969996	0.44684863	0.654984356	0.99718055
WBGene00000370	5.337610941	0.107551018	0.130554716	0.823800324	0.410053023	0.99718055
WBGene00000371	420.1016415	0.011194481	0.095125071	0.117681711	0.906319859	0.99718055
WBGene00000372	0.313304675	0.009229913	0.027364727	0.337292342	0.735896532	0.99718055
WBGene00000373	1.655871459	0.08745942	0.083114776	1.052272818	0.292674399	0.99718055
WBGene00000374	348.7292975	-0.257761132	0.120818801	-2.133452155	0.032887653	0.99718055
WBGene00000375	180.8523877	0.041308614	0.104668274	0.394662221	0.693092187	0.99718055
WBGene00000376	485.2871626	0.016867145	0.09608947	0.175535833	0.860658617	0.99718055
WBGene00000377	651.8145139	0.039254506	0.119809626	0.327640667	0.74318337	0.99718055
WBGene00000378	790.1214399	0.049802887	0.081533041	0.610830738	0.541311642	0.99718055
WBGene00000379	390.0742878	0.065624836	0.0896873	0.731707123	0.464347348	0.99718055
WBGene00000380	193.4279603	-0.157843015	0.127482884	-1.238150644	0.215660208	0.99718055
WBGene00000381	510.2928464	0.061649975	0.095343359	0.646610056	0.517884348	0.99718055
WBGene00000382	649.5153709	0.026767666	0.107270579	0.249534083	0.80294768	0.99718055
WBGene00000383	860.8634533	0.013793022	0.068352001	0.201793978	0.84007779	0.99718055
WBGene00000386	488.0634721	0.050157072	0.129178485	0.38827729	0.697810841	0.99718055
WBGene00000387	457.4811803	0.075442493	0.124983533	0.603619458	0.546096673	0.99718055
WBGene00000388	35.01265061	0.02720944	0.153471441	0.177293181	0.859278107	0.99718055
WBGene00000389	6.30875426	-0.02570028	0.087716973	-0.292990962	0.76952906	0.99718055
WBGene00000390	384.8947442	0.132018036	0.112664624	1.171778965	0.24128581	0.99718055
WBGene00000391	0.369120568	-0.013431384	0.03467191	-0.387385173	0.698471079	0.99718055
WBGene00000392	210.5161562	0.278601816	0.125748857	2.215541544	0.026722916	0.99718055
WBGene00000393	723.7723687	-0.020617433	0.108371835	-0.190247151	0.849115465	0.99718055
WBGene00000395	26.67945706	0.462480472	0.155363988	2.976754651	0.00291317	0.99718055
WBGene00000396	139.4040952	0.181905533	0.119815983	1.518207569	0.12896208	0.99718055
WBGene00000397	106.0655713	-0.076616238	0.133946321	-0.571992105	0.567327323	0.99718055
WBGene00000399	7.645406483	0.166352364	0.135269031	1.229788976	0.218776137	0.99718055
WBGene00000401	4.771996653	-0.161612712	0.115151454	-1.403479555	0.160473884	0.99718055
WBGene00000402	2.337561412	0.02008747	0.092252306	0.217744912	0.827627869	0.99718055
WBGene00000403	15.47033858	-0.216666154	0.156108449	-1.387920741	0.165161181	0.99718055
WBGene00000405	2222.828865	-0.013975262	0.088362211	-0.158158814	0.874331657	0.99718055
WBGene00000406	25.38400276	0.209284346	0.156700334	1.335570515	0.181689693	0.99718055
WBGene00000407	414.6183698	-0.234099982	0.137030006	-1.70838482	0.087564962	0.99718055
WBGene00000408	278.9845434	0.13293096	0.122853136	1.082031476	0.279238542	0.99718055
WBGene00000409	321.4414609	-0.150526683	0.133487985	-1.12764219	0.259471061	0.99718055
WBGene00000410	788.1298717	0.032173319	0.107163776	0.300225699	0.764005004	0.99718055
WBGene00000411	659.0612308	0.086506052	0.110401654	0.783557574	0.433299758	0.99718055
WBGene00000412	0.34487618	-0.000618022	0.028030773	-0.022047983	0.98240968	0.99718055
WBGene00000413	727.8284558	0.11601695	0.094120314	1.232645165	0.217708178	0.99718055
WBGene00000414	35.99034397	0.208180085	0.154842936	1.344459686	0.178799784	0.99718055
WBGene00000415	330.2328407	-0.007295839	0.098701571	-0.07391817	0.941075498	0.99718055
WBGene00000416	559.3476946	0.083963787	0.114657452	0.732301174	0.463984763	0.99718055
WBGene00000417	473.4500203	0.014735015	0.079246857	0.185938165	0.852493253	0.99718055
WBGene00000418	615.3663195	0.14516798	0.088491382	1.640475902	0.100906255	0.99718055
WBGene00000419	742.9993993	0.107525154	0.082138184	1.309076351	0.190508489	0.99718055
WBGene00000420	150.4385514	0.320710861	0.11725336	2.735195497	0.006234324	0.99718055
WBGene00000421	513.7048954	0.086394794	0.092749168	0.931488611	0.351600873	0.99718055
WBGene00000422	111.0027478	-0.109625819	0.137285766	-0.798522833	0.424567148	0.99718055
WBGene00000423	311.8765918	0.156875015	0.114921039	1.365067845	0.172231727	0.99718055
WBGene00000424	601.5559111	0.087362113	0.08488183	1.029220421	0.303376108	0.99718055
WBGene00000425	1.825107858	0.049032262	0.08633333	0.567941282	0.570074839	0.99718055
WBGene00000426	220.7502582	0.097142611	0.098264557	0.988582396	0.322867503	0.99718055
WBGene00000427	1.06113482	-0.035664947	0.063850669	-0.558568107	0.576456511	0.99718055
WBGene00000428	0.150210678	-0.005423572	0.027179963	-0.199543013	0.841838	0.99718055
WBGene00000429	4.477462472	-0.097769238	0.119815971	-0.815995039	0.414502973	0.99718055
WBGene00000430	2.910282185	0.138627847	0.098908678	1.401574155	0.161042449	0.99718055
WBGene00000431	1.905463072	-0.038855767	0.087571085	-0.443705443	0.65725556	0.99718055
WBGene00000433	1.495618633	0.01463312	0.075113043	0.194814634	0.845538066	0.99718055
WBGene00000434	14.35301936	-0.067148126	0.150905798	-0.444967168	0.656343481	0.99718055
WBGene00000435	2.124826048	0.077783723	0.096837999	0.803235545	0.421838605	0.99718055
WBGene00000436	0.678288658	-0.008691643	0.043825036	-0.198325969	0.842790035	0.99718055
WBGene00000437	2.190140193	0.003288407	0.083144288	0.039550605	0.968451408	0.99718055
WBGene00000438	0.48566668	0.02321011	0.035919679	0.64616697	0.518171228	0.99718055
WBGene00000439	1.477155732	-0.017387869	0.077030718	-0.225726428	0.821414202	0.99718055
WBGene00000440	1.158544558	0.075276366	0.07016398	1.072863408	0.283332406	0.99718055
WBGene00000441	1.023927321	-0.021837904	0.0661969	-0.329893158	0.741480693	0.99718055
WBGene00000442	3.463672925	0.116330692	0.11063569	1.05147527	0.293040361	0.99718055
WBGene00000443	5192.611893	-0.092399622	0.097437293	-0.948298328	0.342977602	0.99718055
WBGene00000444	24.27442447	0.12543375	0.156439891	0.801801573	0.422667748	0.99718055
WBGene00000445	0.346399069	0.012363877	0.028361917	0.435932343	0.662885818	0.99718055
WBGene00000446	0.145305891	-0.005423572	0.027179963	-0.199543013	0.841838	0.99718055
WBGene00000447	0.62613478	0.024470361	0.050569589	0.483894788	0.628460539	0.99718055
WBGene00000448	18.78778635	-0.082048533	0.146469852	-0.560173521	0.575361086	0.99718055
WBGene00000449	0.658916617	0.025353338	0.054456287	0.465572292	0.64152168	0.99718055
WBGene00000450	0.132715859	0.004261962	0.027179963	0.156805309	0.875398289	0.99718055
WBGene00000451	0.265431719	0.009076819	0.02718044	0.333946736	0.738419752	0.99718055
WBGene00000452	21.56139793	0.067136312	0.152032433	0.441592038	0.658784447	0.99718055
WBGene00000453	2.271881985	-0.023207915	0.085314464	-0.272027909	0.78560056	0.99718055
WBGene00000455	0.822803595	-0.020578784	0.06107496	-0.336943064	0.736159821	0.99718055
WBGene00000457	0.286995376	0.009109362	0.027180199	0.335146994	0.737514204	0.99718055
WBGene00000458	3.488401091	0.161943137	0.112598343	1.438237292	0.150366737	0.99718055
WBGene00000459	356.3830762	-0.023724278	0.085439883	-0.277672175	0.781264022	0.99718055
WBGene00000460	986.9692823	-0.048224342	0.130955353	-0.368250252	0.712686643	0.99718055
WBGene00000461	15.38378439	-0.080236184	0.153064186	-0.524199595	0.600139723	0.99718055
WBGene00000462	220.7832078	-0.155105056	0.137382379	-1.12900255	0.258896758	0.99718055
WBGene00000463	398.6732879	-0.104572443	0.139357122	-0.750391808	0.453018763	0.99718055
WBGene00000464	257.9238377	0.076171048	0.1060095	0.718530396	0.472430313	0.99718055
WBGene00000465	983.5223723	0.161459419	0.130416534	1.238028751	0.2157054	0.99718055
WBGene00000466	382.609061	0.011784912	0.126324121	0.093291066	0.92567233	0.99718055
WBGene00000467	875.8809193	0.032815557	0.076132299	0.43103331	0.666444151	0.99718055
WBGene00000468	5.092127493	0.141254899	0.123578367	1.143039052	0.253022377	0.99718055
WBGene00000469	1226.515621	0.052722018	0.146432176	0.360043946	0.71881427	0.99718055
WBGene00000472	374.584076	0.063729322	0.101981334	0.62491163	0.532029059	0.99718055
WBGene00000473	887.2443557	0.162297848	0.080486687	2.016455808	0.043752335	0.99718055
WBGene00000474	497.532785	0.194935463	0.080962986	2.407710904	0.016052887	0.99718055
WBGene00000475	100.8336609	0.084771372	0.128809734	0.658113085	0.510465468	0.99718055
WBGene00000476	9.194580367	-0.053123273	0.13808446	-0.384715797	0.70044799	0.99718055
WBGene00000477	15.55329948	-0.101127993	0.152088258	-0.664929658	0.506095485	0.99718055
WBGene00000478	15.00730008	0.111417952	0.137637641	0.809502045	0.418226427	0.99718055
WBGene00000479	1160.245107	0.229261538	0.117004376	1.959427038	0.050062797	0.99718055
WBGene00000480	617.9405454	-0.194259275	0.089057775	-2.1812725	0.029163267	0.99718055
WBGene00000481	0.561014666	0.026087506	0.037316464	0.699088382	0.484496799	0.99718055
WBGene00000482	216.5844193	-0.155064935	0.131707115	-1.177346683	0.239057161	0.99718055
WBGene00000483	0.902365302	-0.008567292	0.052982602	-0.161700091	0.871542033	0.99718055
WBGene00000484	0.136814762	0.004261962	0.027179963	0.156805309	0.875398289	0.99718055
WBGene00000485	12.85475789	0.08249267	0.153108457	0.53878585	0.590034629	0.99718055
WBGene00000487	1.679429951	-0.005033689	0.07682711	-0.065519695	0.947760226	0.99718055
WBGene00000488	0.563243727	-0.031316124	0.044798957	-0.699036896	0.484528973	0.99718055
WBGene00000490	0.530473789	0.021039418	0.052075076	0.404020871	0.686197372	0.99718055
WBGene00000491	1.322620203	-0.015326708	0.065485957	-0.234045718	0.814949487	0.99718055
WBGene00000492	5.328979755	0.012103859	0.119573474	0.101225289	0.919371622	0.99718055
WBGene00000493	23.42492225	-0.147621128	0.156932997	-0.940663412	0.346877375	0.99718055
WBGene00000496	946.2183274	-0.028330565	0.072931892	-0.388452355	0.697681307	0.99718055
WBGene00000497	1105.329516	0.03233473	0.109755389	0.294607222	0.768293945	0.99718055
WBGene00000498	741.9649121	0.106876884	0.099933296	1.069482223	0.284852435	0.99718055
WBGene00000499	1860.866707	-0.064866794	0.070063413	-0.925829787	0.354534445	0.99718055
WBGene00000500	665.2980249	0.039998369	0.106338051	0.376143522	0.7068102	0.99718055
WBGene00000501	5.60173752	-0.011973326	0.120221335	-0.099594022	0.92066664	0.99718055
WBGene00000502	459.2357646	0.008164993	0.123619769	0.066049251	0.947338614	0.99718055
WBGene00000503	2.529069185	0.073844459	0.102530753	0.720217658	0.471390994	0.99718055
WBGene00000506	116.7245404	-0.039776659	0.128816887	-0.308784508	0.757485454	0.99718055
WBGene00000507	205.8640477	0.016744777	0.120195817	0.139312477	0.88920323	0.99718055
WBGene00000508	1750.29365	0.114733452	0.103558451	1.107910085	0.26790065	0.99718055
WBGene00000509	129.8054281	0.168012148	0.126812077	1.324890757	0.185207387	0.99718055
WBGene00000510	0.894153408	0.024269314	0.062777945	0.386589807	0.699059905	0.99718055
WBGene00000511	4.297958284	0.06516562	0.110398437	0.590276654	0.555005189	0.99718055
WBGene00000512	23.64026211	0.09843347	0.151055027	0.651639813	0.514633558	0.99718055
WBGene00000513	1.232929466	-0.082905943	0.072685925	-1.140605188	0.254034257	0.99718055
WBGene00000514	1302.882085	-0.140880717	0.104893699	-1.343080831	0.179245802	0.99718055
WBGene00000515	16.23680005	0.110973057	0.155516231	0.713578618	0.475487783	0.99718055
WBGene00000516	11.38196516	-0.029283175	0.148480812	-0.19721858	0.843656492	0.99718055
WBGene00000517	719.5603802	0.074081946	0.098237351	0.754111802	0.450782091	0.99718055
WBGene00000518	4727.40996	0.054600509	0.124031978	0.440213162	0.659782728	0.99718055
WBGene00000519	474.6534555	-0.073029223	0.093536287	-0.780758201	0.434944722	0.99718055
WBGene00000520	440.7137056	0.017186804	0.09803093	0.175320213	0.86082803	0.99718055
WBGene00000521	2.404797087	-0.152411812	0.099790992	-1.527310312	0.126683866	0.99718055
WBGene00000522	1.147330869	0.003532085	0.064089426	0.055111824	0.956049376	0.99718055
WBGene00000523	8.341930696	0.034202701	0.133183515	0.256808815	0.797326365	0.99718055
WBGene00000524	0.316211477	-0.000884881	0.033482536	-0.026428127	0.97891586	0.99718055
WBGene00000525	0.979155094	0.057702089	0.06431454	0.897185762	0.369619801	0.99718055
WBGene00000526	1.254607397	-0.016780524	0.068913851	-0.243500023	0.807618067	0.99718055
WBGene00000527	11.53424273	0.080242419	0.152098353	0.527569279	0.59779832	0.99718055
WBGene00000528	1.214132921	0.048026376	0.069962611	0.686457743	0.492424502	0.99718055
WBGene00000529	1.121519824	0.011968981	0.070261018	0.170350229	0.864734711	0.99718055
WBGene00000530	183.7958802	-0.110646422	0.138559264	-0.798549435	0.424551718	0.99718055
WBGene00000531	0.388147408	0.018577447	0.034729839	0.534913132	0.592709927	0.99718055
WBGene00000532	902.17037	0.116111427	0.069459867	1.671633313	0.094596652	0.99718055
WBGene00000533	310.5220099	0.027736744	0.088891306	0.312029884	0.755017812	0.99718055
WBGene00000534	340.4701309	-0.168396135	0.088267968	-1.907783073	0.056419259	0.99718055
WBGene00000535	208.1800125	-0.01289509	0.155747039	-0.082795088	0.934014475	0.99718055
WBGene00000536	148.8635328	-0.015848663	0.136885053	-0.115780814	0.907826257	0.99718055
WBGene00000537	341.29684	0.034069938	0.105173124	0.323941489	0.745982332	0.99718055
WBGene00000539	1.627110255	0.048617157	0.076140587	0.638518283	0.523136356	0.99718055
WBGene00000540	172.1544914	-0.176918699	0.153126572	-1.155375558	0.247936666	0.99718055
WBGene00000541	0.81299503	-0.040920818	0.058502546	-0.699470721	0.484257905	0.99718055
WBGene00000542	1181.388847	0.03587815	0.09378606	0.382553119	0.702051136	0.99718055
WBGene00000543	2077.287035	-0.031425161	0.069189663	-0.454188673	0.649693035	0.99718055
WBGene00000544	172.4586447	-0.119123296	0.156968124	-0.758901191	0.447911666	0.99718055
WBGene00000545	1424.748689	0.054300131	0.142558668	0.380896733	0.703279877	0.99718055
WBGene00000546	1612.065764	-0.093483014	0.128289686	-0.728686901	0.466193207	0.99718055
WBGene00000547	491.9693943	0.009763701	0.079819588	0.122322112	0.90264392	0.99718055
WBGene00000548	449.6123607	0.16376984	0.085234472	1.921403826	0.054680817	0.99718055
WBGene00000549	10725.94377	-0.0442393	0.050988127	-0.867639239	0.385591858	0.99718055
WBGene00000550	1253.026691	0.09968449	0.10695188	0.932049909	0.351310733	0.99718055
WBGene00000552	165.9603013	0.201735951	0.128721599	1.567226884	0.117061669	0.99718055
WBGene00000553	29.54030178	0.212800925	0.156409352	1.360538369	0.173659619	0.99718055
WBGene00000554	1210.849482	-0.020120759	0.079824219	-0.252063333	0.800992111	0.99718055
WBGene00000556	0.213209494	0.006683352	0.027179963	0.245892606	0.805765368	0.99718055
WBGene00000561	1.237529003	-0.041863208	0.060696081	-0.689718463	0.490371253	0.99718055
WBGene00000562	7.181999066	-0.167314814	0.133523452	-1.253074359	0.210178647	0.99718055
WBGene00000563	0.744906623	0.023558534	0.045886292	0.513411138	0.607663756	0.99718055
WBGene00000564	293.746386	-0.016643261	0.086394026	-0.192643655	0.847238053	0.99718055
WBGene00000565	433.0606755	-0.112791901	0.094195855	-1.197418942	0.231143304	0.99718055
WBGene00000566	723.9996661	-0.0473813	0.091834059	-0.515944745	0.605893002	0.99718055
WBGene00000567	565.7767471	0.109074238	0.123439598	0.88362438	0.376899014	0.99718055
WBGene00000583	0.136302203	-0.005423572	0.027179963	-0.199543013	0.841838	0.99718055
WBGene00000584	3.261515105	0.045234883	0.103244173	0.438134978	0.66128844	0.99718055
WBGene00000585	259.0555283	0.055324741	0.140046035	0.395046821	0.692808334	0.99718055
WBGene00000591	55.95341792	-0.078497266	0.155561972	-0.504604466	0.613836673	0.99718055
WBGene00000592	742.3261575	-0.023707031	0.094341295	-0.251290072	0.80158985	0.99718055
WBGene00000594	0.511280964	-0.059341911	0.043585157	-1.36151653	0.173350513	0.99718055
WBGene00000596	0.145879544	-0.005423572	0.027179963	-0.199543013	0.841838	0.99718055
WBGene00000597	0.70029683	0.050879414	0.049929091	1.019033463	0.30818708	0.99718055
WBGene00000598	0.747658746	-0.053276623	0.048583837	-1.096591512	0.272819999	0.99718055
WBGene00000602	0.235561436	0.006683352	0.027179963	0.245892606	0.805765368	0.99718055
WBGene00000603	0.492815206	0.040359685	0.046727648	0.863721744	0.387740766	0.99718055
WBGene00000606	0.425246826	0.004025995	0.041325369	0.097421876	0.922391372	0.99718055
WBGene00000608	1.696214208	-0.080471394	0.083853379	-0.959667875	0.337222396	0.99718055
WBGene00000609	2.770457556	-0.0684325	0.09571811	-0.71493785	0.474647447	0.99718055
WBGene00000610	6.254558475	-0.140905682	0.121787682	-1.156978109	0.247281304	0.99718055
WBGene00000611	2.801082226	-0.168116449	0.097587123	-1.722731898	0.084937019	0.99718055
WBGene00000612	1.405466582	-0.022273224	0.077925385	-0.285827579	0.775010184	0.99718055
WBGene00000613	0.648293347	-0.005822279	0.055199094	-0.105477805	0.915996681	0.99718055
WBGene00000616	3.865692724	-0.028955327	0.108364521	-0.267203014	0.789312855	0.99718055
WBGene00000617	5.361101126	-0.187664734	0.130403306	-1.439110248	0.150119289	0.99718055
WBGene00000618	0.409487044	0.003443009	0.034851956	0.098789562	0.921305356	0.99718055
WBGene00000620	1.685248055	-0.075344611	0.059218205	-1.272321776	0.203258815	0.99718055
WBGene00000621	0.232687565	-0.012687716	0.027179963	-0.466804039	0.640640086	0.99718055
WBGene00000622	1144.701949	-0.05787347	0.120265544	-0.481214055	0.630364373	0.99718055
WBGene00000623	8.651004655	0.180640919	0.140842175	1.282576892	0.19964035	0.99718055
WBGene00000625	1.674896188	-0.054535597	0.078177139	-0.697590081	0.485433586	0.99718055
WBGene00000627	0.467614255	0.00741514	0.036038357	0.205756894	0.836980814	0.99718055
WBGene00000628	0.751683969	-0.046002187	0.05623748	-0.817998738	0.413357908	0.99718055
WBGene00000629	0.241883147	-0.012687716	0.027179963	-0.466804039	0.640640086	0.99718055
WBGene00000630	14.42771604	-0.098502413	0.152720804	-0.644983592	0.518937819	0.99718055
WBGene00000631	8.804825756	0.025800617	0.131858386	0.19566914	0.84486914	0.99718055
WBGene00000633	4.05643184	-0.134277411	0.119385223	-1.124740631	0.260698959	0.99718055
WBGene00000634	0.342027152	0.012177497	0.028424417	0.428416762	0.668347723	0.99718055
WBGene00000636	651.2966986	0.051276085	0.155496197	0.329757808	0.74158297	0.99718055
WBGene00000637	0.415780168	-0.012815826	0.035053535	-0.365607245	0.714658168	0.99718055
WBGene00000638	0.366692133	-0.000943177	0.034554652	-0.027295224	0.978224266	0.99718055
WBGene00000639	7.458778043	-0.174560893	0.135780324	-1.285612583	0.198578303	0.99718055
WBGene00000640	8.106930749	0.036500249	0.123002586	0.296743755	0.766662149	0.99718055
WBGene00000641	1.434685156	0.003946017	0.067530904	0.058432759	0.953403922	0.99718055
WBGene00000642	2.572622612	-0.026567302	0.084757225	-0.313451771	0.753937457	0.99718055
WBGene00000644	16.92558541	-0.017416536	0.148103285	-0.117597227	0.906386802	0.99718055
WBGene00000646	0.708581828	-0.026993679	0.056398876	-0.47862086	0.632208376	0.99718055
WBGene00000647	8334.357757	-0.131088533	0.127056208	-1.031736551	0.30219555	0.99718055
WBGene00000648	89.99239352	-0.161608169	0.145457712	-1.111031979	0.266554585	0.99718055
WBGene00000649	0.46537513	-0.022376782	0.027297714	-0.81973098	0.412369485	0.99718055
WBGene00000650	0.411007024	-0.030538264	0.03602426	-0.84771385	0.396597351	0.99718055
WBGene00000652	14.18001899	-0.105392194	0.141435016	-0.745163375	0.456172961	0.99718055
WBGene00000653	0.943214912	0.037919215	0.057415749	0.660432302	0.508976449	0.99718055
WBGene00000654	0.470278778	0.011297578	0.046613436	0.242367415	0.808495481	0.99718055
WBGene00000655	0.219936502	0.006683352	0.027179963	0.245892606	0.805765368	0.99718055
WBGene00000656	2.621044815	-0.041017244	0.079307177	-0.517194602	0.60502032	0.99718055
WBGene00000657	1.75447323	-0.093589141	0.078587256	-1.190894617	0.233694958	0.99718055
WBGene00000658	3.094053425	0.050214366	0.103268938	0.486248497	0.626790991	0.99718055
WBGene00000659	0.880642022	0.013028181	0.050348404	0.258760548	0.795819999	0.99718055
WBGene00000660	46.13197155	-0.207617185	0.156947603	-1.32284394	0.185887281	0.99718055
WBGene00000661	3.551942591	0.07368827	0.107006989	0.688630439	0.491055861	0.99718055
WBGene00000662	9.099450136	-0.078003513	0.142134378	-0.548801169	0.583141908	0.99718055
WBGene00000663	9.671617553	-0.110161483	0.138568718	-0.794995321	0.426616224	0.99718055
WBGene00000664	10.03513562	-0.111575206	0.144934424	-0.769832334	0.441399357	0.99718055
WBGene00000665	4.745386565	0.092801235	0.124756958	0.74385618	0.456963488	0.99718055
WBGene00000666	0.569647172	0.0346757	0.04233167	0.819143204	0.412704715	0.99718055
WBGene00000667	0.624314307	-0.010313575	0.043264617	-0.238383608	0.81158358	0.99718055
WBGene00000668	3.121888697	-0.012843725	0.091757701	-0.13997436	0.888680249	0.99718055
WBGene00000669	0.307146695	0.013817427	0.033417974	0.413472907	0.679260168	0.99718055
WBGene00000670	5.029883321	-0.068772793	0.119835964	-0.573891102	0.566041495	0.99718055
WBGene00000671	1.698749243	0.047047726	0.053560156	0.878409052	0.379721774	0.99718055
WBGene00000672	153.4759524	0.041052098	0.156690711	0.261994456	0.793325716	0.99718055
WBGene00000673	1.20780448	-0.002286991	0.059734639	-0.038285849	0.969459774	0.99718055
WBGene00000674	3.273734277	-0.064927687	0.098286567	-0.660595738	0.508871603	0.99718055
WBGene00000675	1.817814172	-0.034763318	0.082354694	-0.422117015	0.672939609	0.99718055
WBGene00000676	10.42857079	-0.026773898	0.13280373	-0.201605015	0.840225525	0.99718055
WBGene00000677	80.02868127	-0.170404693	0.15477358	-1.100993419	0.270899521	0.99718055
WBGene00000678	10.25541869	-0.153270155	0.148763825	-1.03029184	0.302873028	0.99718055
WBGene00000679	0.875622285	0.017970022	0.065124109	0.275935016	0.782597979	0.99718055
WBGene00000680	0.249469911	0.006683352	0.027179963	0.245892606	0.805765368	0.99718055
WBGene00000681	0.915235338	-0.012134664	0.053848666	-0.225347526	0.82170893	0.99718055
WBGene00000682	0.356812962	0.009792122	0.028179196	0.347494725	0.728219681	0.99718055
WBGene00000683	0.747755251	-0.055082326	0.052878225	-1.041682588	0.297558864	0.99718055
WBGene00000684	1.413966515	-0.072539325	0.069277428	-1.047084558	0.29506058	0.99718055
WBGene00000685	4081.864908	-0.246372308	0.120225665	-2.049248868	0.040437786	0.99718055
WBGene00000687	1.568292557	-0.091046659	0.077416738	-1.176059095	0.239571262	0.99718055
WBGene00000688	5.832901596	-0.050190095	0.121422159	-0.413352021	0.679348721	0.99718055
WBGene00000689	3.04463822	-0.097009591	0.109915377	-0.882584346	0.377460889	0.99718055
WBGene00000690	0.289604227	0.009104741	0.027179963	0.334979903	0.737640246	0.99718055
WBGene00000691	0.410462868	0.019672091	0.035689335	0.551203632	0.581494091	0.99718055
WBGene00000693	1.832345041	-0.054220655	0.083217604	-0.651552707	0.514689765	0.99718055
WBGene00000694	0.623208844	0.023458545	0.049128667	0.477491997	0.633011819	0.99718055
WBGene00000695	2.053242731	-0.063640167	0.073703677	-0.863459862	0.387884679	0.99718055
WBGene00000696	3.492635044	0.005404675	0.102697123	0.052627324	0.958028846	0.99718055
WBGene00000697	0.578902753	-0.010168233	0.048520648	-0.209565077	0.834007139	0.99718055
WBGene00000698	7.949052865	-0.182993876	0.138056089	-1.325503838	0.185004097	0.99718055
WBGene00000699	0.293248669	0.009117059	0.02718059	0.33542535	0.737304248	0.99718055
WBGene00000700	1.228401019	-0.042348101	0.075071025	-0.564107137	0.572681221	0.99718055
WBGene00000701	0.566390049	0.025560533	0.037002105	0.690785921	0.489700084	0.99718055
WBGene00000702	3.068159621	-0.053716674	0.093560044	-0.574141184	0.565872266	0.99718055
WBGene00000703	8.717234123	-0.011141594	0.141344568	-0.078825769	0.937171207	0.99718055
WBGene00000704	2.910302268	0.005396324	0.093097704	0.057964095	0.953777229	0.99718055
WBGene00000706	8.325033002	-0.137823318	0.144434193	-0.954229156	0.339967659	0.99718055
WBGene00000707	1.876808099	-0.017401746	0.066813009	-0.260454464	0.794513236	0.99718055
WBGene00000708	0.904091216	-0.060455515	0.05920321	-1.021152657	0.307182119	0.99718055
WBGene00000709	89.0414034	-0.082331068	0.156822376	-0.524995666	0.599586204	0.99718055
WBGene00000710	0.136814762	0.004261962	0.027179963	0.156805309	0.875398289	0.99718055
WBGene00000711	0.330928169	-0.000892099	0.033617223	-0.026536948	0.978829063	0.99718055
WBGene00000712	26.06551236	-0.189362056	0.156588229	-1.20929943	0.22654783	0.99718055
WBGene00000713	0.673219199	-0.038490768	0.038765026	-0.992925101	0.320746456	0.99718055
WBGene00000714	0.185964199	0.004261962	0.027179963	0.156805309	0.875398289	0.99718055
WBGene00000715	0.314248987	0.009522617	0.027798932	0.342553328	0.731934519	0.99718055
WBGene00000716	1.599250827	0.009042853	0.077050338	0.117362927	0.906572461	0.99718055
WBGene00000718	0.21101626	-0.003002182	0.027179963	-0.110455716	0.912047968	0.99718055
WBGene00000719	0.384066573	0.009104741	0.027179963	0.334979903	0.737640246	0.99718055
WBGene00000720	0.323291577	0.009450874	0.027694703	0.341252054	0.732913839	0.99718055
WBGene00000721	0.393954716	0.003918453	0.040361704	0.097083447	0.922660127	0.99718055
WBGene00000722	0.447737736	-0.023144237	0.031080816	-0.744647008	0.456485142	0.99718055
WBGene00000723	1.804136441	-0.128445557	0.087739194	-1.463947307	0.143208346	0.99718055
WBGene00000724	0.531779785	0.041978792	0.04745657	0.884572809	0.376387078	0.99718055
WBGene00000725	0.216441921	0.004261962	0.027179963	0.156805309	0.875398289	0.99718055
WBGene00000726	0.60700953	-0.028663611	0.037995535	-0.754394201	0.450612553	0.99718055
WBGene00000727	19.03715744	-0.21417212	0.132073198	-1.621616828	0.104885417	0.99718055
WBGene00000728	48.8673274	-0.079562618	0.154139522	-0.516172728	0.605733776	0.99718055
WBGene00000729	0.701375327	0.059052867	0.053605551	1.101618497	0.270627563	0.99718055
WBGene00000730	2898.031408	-0.202243658	0.071782621	-2.817446002	0.004840725	0.99718055
WBGene00000731	2.976977325	0.089601894	0.085968109	1.042268987	0.297286986	0.99718055
WBGene00000732	1.344049924	-0.028976958	0.065405326	-0.443036674	0.657739208	0.99718055
WBGene00000733	2.732309593	-0.134619368	0.086379417	-1.558465817	0.119122865	0.99718055
WBGene00000734	43.51660156	-0.044922535	0.132147436	-0.339942539	0.733899801	0.99718055
WBGene00000735	301.0326059	-0.206950116	0.154645026	-1.338226788	0.180822519	0.99718055
WBGene00000736	4.905039898	-0.013323493	0.128401541	-0.103764272	0.91735642	0.99718055
WBGene00000737	0.747666038	0.049188691	0.049109324	1.00161612	0.316529032	0.99718055
WBGene00000738	0.779369731	-0.087603327	0.049529081	-1.768725073	0.076939766	0.99718055
WBGene00000739	0.942658134	-0.006792439	0.055107288	-0.12325845	0.901902442	0.99718055
WBGene00000743	0.127811073	0.004261962	0.027179963	0.156805309	0.875398289	0.99718055
WBGene00000744	3.060549593	0.042037066	0.102893845	0.408547914	0.682871461	0.99718055
WBGene00000745	0.447621946	0.008412668	0.041300911	0.203692071	0.838594139	0.99718055
WBGene00000746	1.668185719	-0.024238602	0.063678912	-0.380637816	0.703472017	0.99718055
WBGene00000747	0.182750531	-0.005423572	0.027179963	-0.199543013	0.841838	0.99718055
WBGene00000748	0.580568718	0.049015198	0.049966311	0.98096492	0.326610041	0.99718055
WBGene00000749	0.289519072	-0.003002182	0.027179963	-0.110455716	0.912047968	0.99718055
WBGene00000751	1.325004074	0.020098903	0.060038119	0.334769038	0.737799318	0.99718055
WBGene00000752	0.281616875	0.009104741	0.027179963	0.334979903	0.737640246	0.99718055
WBGene00000753	12.81746653	-0.130030927	0.151746987	-0.856892974	0.391504036	0.99718055
WBGene00000754	2.165538651	-0.064084833	0.088304344	-0.725726852	0.468006237	0.99718055
WBGene00000756	1.997333707	-0.035035827	0.066921329	-0.523537529	0.600600242	0.99718055
WBGene00000757	0.317613367	-0.000607516	0.027793387	-0.021858276	0.982561007	0.99718055
WBGene00000758	0.355731978	-0.000636312	0.028439134	-0.022374512	0.982149212	0.99718055
WBGene00000759	0.963903465	0.054374442	0.063192855	0.860452377	0.389539724	0.99718055
WBGene00000760	5.590121922	0.109590646	0.129402221	0.846899272	0.397051268	0.99718055
WBGene00000761	378.3975984	-0.019770521	0.092385473	-0.214000325	0.830546804	0.99718055
WBGene00000762	257.0794712	-0.057244968	0.102462988	-0.558689225	0.576373834	0.99718055
WBGene00000763	856.4176956	-0.031460654	0.109460525	-0.287415522	0.773794178	0.99718055
WBGene00000764	82.17954582	0.104275427	0.13341937	0.781561379	0.434472392	0.99718055
WBGene00000765	361.1985027	-0.017766401	0.121103412	-0.146704382	0.88336536	0.99718055
WBGene00000766	57.20192604	-0.009023976	0.136465839	-0.066126261	0.947277303	0.99718055
WBGene00000767	219.1401496	0.012380715	0.128552674	0.0963085	0.923275561	0.99718055
WBGene00000768	83.928462	-0.043410635	0.156062633	-0.278161623	0.780888293	0.99718055
WBGene00000770	832.9490235	-0.206612993	0.085144942	-2.426603251	0.015240913	0.99718055
WBGene00000771	6.758979807	-0.100526908	0.111459538	-0.901913917	0.367102598	0.99718055
WBGene00000772	1422.899449	0.142084146	0.074486465	1.907516303	0.056453762	0.99718055
WBGene00000773	387.123345	0.060817248	0.097326041	0.624881556	0.532048798	0.99718055
WBGene00000774	366.9278126	0.006091033	0.106131569	0.057391344	0.954233458	0.99718055
WBGene00000775	1014.989829	0.122725116	0.153258039	0.800774413	0.423262254	0.99718055
WBGene00000776	9.340974568	-0.038428842	0.139338438	-0.275794985	0.782705536	0.99718055
WBGene00000777	90.22485655	0.085233272	0.123686954	0.689104784	0.49075733	0.99718055
WBGene00000778	4.693136888	-0.027569759	0.115731387	-0.238221966	0.811708941	0.99718055
WBGene00000779	3.828574831	-0.063248343	0.111499305	-0.56725325	0.570542134	0.99718055
WBGene00000780	6981.587495	-0.122871437	0.101771046	-1.207331963	0.227304326	0.99718055
WBGene00000781	8.253578718	0.004232139	0.139623599	0.030311055	0.97581898	0.99718055
WBGene00000782	2.603614774	-0.052753806	0.091109081	-0.579018086	0.56257697	0.99718055
WBGene00000783	6.114885563	0.13082641	0.125925085	1.038922548	0.298840759	0.99718055
WBGene00000784	9.205533366	0.148272414	0.134825622	1.099734696	0.271447733	0.99718055
WBGene00000785	12.6768293	0.089110022	0.151298728	0.588967421	0.555883128	0.99718055
WBGene00000786	17.86084488	0.032028764	0.156649375	0.204461489	0.837992883	0.99718055
WBGene00000787	614.8830803	-0.19360058	0.120042008	-1.612773585	0.106793707	0.99718055
WBGene00000788	71.1524496	0.058436499	0.143681749	0.406707876	0.684222555	0.99718055
WBGene00000789	12.44352024	0.060291174	0.149065519	0.404460901	0.685873824	0.99718055
WBGene00000792	13.13676655	-0.047701494	0.151134051	-0.315623736	0.752288119	0.99718055
WBGene00000793	56.33805552	-0.086003797	0.142060546	-0.60540241	0.54491165	0.99718055
WBGene00000794	209.8933359	0.128801973	0.105642334	1.219226884	0.222758091	0.99718055
WBGene00000795	134.9592679	-0.153005459	0.155178248	-0.985998108	0.324134041	0.99718055
WBGene00000796	1076.137707	-0.00474293	0.08986687	-0.05277729	0.957909356	0.99718055
WBGene00000797	21.78755221	-0.094500223	0.156892716	-0.602323843	0.546958593	0.99718055
WBGene00000798	375.3805914	-0.024292831	0.0852879	-0.284833262	0.775771888	0.99718055
WBGene00000799	17.17071135	-0.008492077	0.15411682	-0.055101557	0.956057556	0.99718055
WBGene00000800	359.8001476	0.050503923	0.099425808	0.507955874	0.611484289	0.99718055
WBGene00000801	43459.36699	-0.088737828	0.104720199	-0.847380252	0.396783208	0.99718055
WBGene00000802	278.6676867	0.055760734	0.106970787	0.52127067	0.60217823	0.99718055
WBGene00000803	539.0593631	-0.050847952	0.142389681	-0.357104189	0.721013808	0.99718055
WBGene00000804	624.8326766	0.040218925	0.140277274	0.2867102	0.774334227	0.99718055
WBGene00000812	912.5142472	-0.044522566	0.115807458	-0.384453357	0.70064246	0.99718055
WBGene00000813	424.7535063	0.118321612	0.083484809	1.417283139	0.156400163	0.99718055
WBGene00000814	194.5649485	-0.089337061	0.106795112	-0.836527619	0.402858146	0.99718055
WBGene00000815	450.6248308	0.103185971	0.119987837	0.859970258	0.389805438	0.99718055
WBGene00000816	275.2922028	0.125331923	0.136906569	0.915455875	0.359952357	0.99718055
WBGene00000817	385.5128249	-0.035716433	0.098227034	-0.363611026	0.716148492	0.99718055
WBGene00000818	475.8853653	0.026441623	0.121541558	0.217552114	0.827778099	0.99718055
WBGene00000819	7212.278202	0.137299859	0.156803971	0.875614683	0.381239541	0.99718055
WBGene00000820	460.3840687	-0.188886926	0.15196877	-1.242932518	0.213892701	0.99718055
WBGene00000821	1273.028129	-0.048688794	0.095496557	-0.509848687	0.610157473	0.99718055
WBGene00000822	7.160475516	-0.086079654	0.141924823	-0.606515847	0.544172263	0.99718055
WBGene00000829	2.352181376	-0.161762749	0.097198546	-1.664250704	0.096062339	0.99718055
WBGene00000830	58.64004986	-0.013274216	0.14595416	-0.090947842	0.927534035	0.99718055
WBGene00000831	9.462564537	-0.028064256	0.136952575	-0.204919518	0.837635006	0.99718055
WBGene00000832	34.38083544	-0.11715478	0.154006275	-0.76071433	0.446827713	0.99718055
WBGene00000833	359.7311048	-0.012023223	0.088586788	-0.135722529	0.892040637	0.99718055
WBGene00000834	653.2183045	0.113735991	0.107467827	1.058325954	0.289906864	0.99718055
WBGene00000835	231.6360769	0.096831161	0.123027518	0.787069122	0.431241404	0.99718055
WBGene00000836	745.3299178	0.066441635	0.122427135	0.542703502	0.587333963	0.99718055
WBGene00000837	653.1180896	0.107821871	0.135253409	0.79718413	0.425344101	0.99718055
WBGene00000838	354.172176	0.025557756	0.12286573	0.208013706	0.835218266	0.99718055
WBGene00000839	882.1254517	-0.00933465	0.083192861	-0.112204943	0.91066091	0.99718055
WBGene00000840	453.439583	0.042679725	0.126383798	0.33769934	0.735589772	0.99718055
WBGene00000841	7.392585483	0.253172106	0.140901928	1.796796604	0.072367916	0.99718055
WBGene00000843	183.4665519	0.134534364	0.132461847	1.015646141	0.309797924	0.99718055
WBGene00000846	281.9815857	0.183628646	0.101819523	1.803471871	0.071314139	0.99718055
WBGene00000851	14.81900863	-0.069169482	0.140600961	-0.491955967	0.622750472	0.99718055
WBGene00000854	293.6470497	0.08996178	0.094271177	0.954287235	0.339938268	0.99718055
WBGene00000857	995.5076425	-0.007996442	0.126275304	-0.063325465	0.949507338	0.99718055
WBGene00000858	3.307185789	-0.124475041	0.104751116	-1.18829322	0.234717908	0.99718055
WBGene00000862	5.354401295	-0.019512492	0.111949109	-0.174297877	0.861631368	0.99718055
WBGene00000863	1163.635606	0.086710057	0.105777088	0.819743281	0.412362471	0.99718055
WBGene00000864	493.5413328	-0.209049139	0.135844592	-1.538884517	0.123832492	0.99718055
WBGene00000865	325.2818004	0.054413122	0.123034816	0.442257923	0.658302575	0.99718055
WBGene00000866	377.8400549	0.058595051	0.103925385	0.563818465	0.572877684	0.99718055
WBGene00000867	540.5904272	0.027491505	0.136925835	0.200776609	0.840873254	0.99718055
WBGene00000868	563.4933342	0.10557559	0.08848084	1.193202845	0.232789941	0.99718055
WBGene00000869	123.8343367	0.074034733	0.128482445	0.5762245	0.564463447	0.99718055
WBGene00000870	17.18746012	-0.031352288	0.150821906	-0.207876222	0.835325615	0.99718055
WBGene00000871	908.339882	0.012733611	0.066932609	0.19024525	0.849116954	0.99718055
WBGene00000872	2158.274662	0.020153062	0.099108239	0.203343963	0.838866196	0.99718055
WBGene00000874	949.9895569	0.021759304	0.120350227	0.180799855	0.856524677	0.99718055
WBGene00000875	1652.216473	0.088776594	0.127832653	0.694475097	0.487384313	0.99718055
WBGene00000876	235.7504973	0.021984922	0.118197312	0.186001874	0.852443292	0.99718055
WBGene00000877	156.6628268	-0.022368868	0.127078935	-0.176023417	0.860275545	0.99718055
WBGene00000878	10.57658014	-0.066277896	0.141935735	-0.466957078	0.640530587	0.99718055
WBGene00000879	144.1451107	-0.006167872	0.116754819	-0.052827558	0.957869304	0.99718055
WBGene00000880	337.6585569	0.110771121	0.111008757	0.997859305	0.318347588	0.99718055
WBGene00000881	68.53196028	-0.039033355	0.136116173	-0.286765007	0.774292259	0.99718055
WBGene00000882	4.958332969	0.017948323	0.127393865	0.14088844	0.887958074	0.99718055
WBGene00000883	473.6193411	0.231797215	0.112634113	2.057966359	0.039593363	0.99718055
WBGene00000884	48.68910105	0.024509234	0.154215516	0.158928454	0.873725243	0.99718055
WBGene00000886	100.868114	0.133220245	0.132679579	1.004074974	0.315342477	0.99718055
WBGene00000887	71.35285989	-0.092753969	0.148989136	-0.622555252	0.533576825	0.99718055
WBGene00000888	132.0478748	0.133640759	0.124857532	1.070345992	0.2844636	0.99718055
WBGene00000889	608.0037204	-0.026502407	0.135561684	-0.195500725	0.84500097	0.99718055
WBGene00000890	307.5478665	0.023968789	0.104244663	0.229928216	0.81814755	0.99718055
WBGene00000891	734.2614773	0.140724917	0.124788767	1.127705008	0.259444522	0.99718055
WBGene00000892	243.6819241	-0.022738648	0.093117923	-0.244191963	0.807082151	0.99718055
WBGene00000893	24.13814154	-0.299247988	0.156948993	-1.906657586	0.056564943	0.99718055
WBGene00000894	645.6575763	0.080596419	0.081342139	0.990832295	0.321767477	0.99718055
WBGene00000895	8.205359297	0.00552597	0.141241014	0.0391244	0.968791207	0.99718055
WBGene00000896	286.0222272	-0.015453591	0.098802162	-0.156409438	0.875710299	0.99718055
WBGene00000897	58.98907581	0.062051466	0.141012364	0.440042733	0.659906158	0.99718055
WBGene00000898	1808.168112	-0.037939516	0.10347335	-0.366659783	0.713872809	0.99718055
WBGene00000899	312.1065387	-0.12081061	0.140190775	-0.861758627	0.388820357	0.99718055
WBGene00000900	25.07363943	-0.05099583	0.15677646	-0.325277343	0.744971177	0.99718055
WBGene00000901	29.25828213	-0.149987631	0.156856671	-0.956208174	0.338967071	0.99718055
WBGene00000902	47.93421287	-0.075163364	0.155841316	-0.482307043	0.629587845	0.99718055
WBGene00000903	392.3477916	-0.161090308	0.13984625	-1.151910105	0.249358016	0.99718055
WBGene00000904	13.10283949	-0.124817229	0.14945931	-0.835125151	0.403647247	0.99718055
WBGene00000905	0.290339736	-0.0008483	0.032791012	-0.025869897	0.979361111	0.99718055
WBGene00000906	9.38750278	0.017217673	0.146178793	0.117785028	0.906237993	0.99718055
WBGene00000907	0.526742447	-0.034784115	0.04342128	-0.801084516	0.42308272	0.99718055
WBGene00000908	6.024151015	-0.24021897	0.134078732	-1.791626203	0.073192863	0.99718055
WBGene00000910	9.559417746	-0.181137445	0.14874182	-1.217797686	0.223300864	0.99718055
WBGene00000911	1181.314421	0.052224184	0.062144558	0.840366165	0.400703114	0.99718055
WBGene00000912	2150.527243	0.103095858	0.079781368	1.292229761	0.196277588	0.99718055
WBGene00000913	1151.502044	-0.050134589	0.064990236	-0.771417253	0.440459652	0.99718055
WBGene00000914	49.69598703	0.264416342	0.145808008	1.81345556	0.069761587	0.99718055
WBGene00000915	2444.742845	0.090223164	0.151513414	0.595479712	0.551522857	0.99718055
WBGene00000917	297.3445742	-0.003207048	0.098562523	-0.032538207	0.974042848	0.99718055
WBGene00000920	5.084456371	-0.008359413	0.117814368	-0.070954106	0.943434281	0.99718055
WBGene00000923	366.993562	0.022137638	0.083646088	0.264658375	0.791272646	0.99718055
WBGene00000928	0.179335622	0.004261962	0.027179963	0.156805309	0.875398289	0.99718055
WBGene00000929	6.135306094	0.011418155	0.130928481	0.087209101	0.930505306	0.99718055
WBGene00000931	1309.5435	0.084869813	0.122994695	0.690028238	0.49017643	0.99718055
WBGene00000933	357.7597822	-0.040964971	0.094486078	-0.433555624	0.664611165	0.99718055
WBGene00000934	7.614861385	-0.143674349	0.134695244	-1.06666238	0.286124321	0.99718055
WBGene00000935	489.6392549	0.096602334	0.094246654	1.024994839	0.305365623	0.99718055
WBGene00000936	1.705268811	-0.012752949	0.072927306	-0.174872076	0.861180152	0.99718055
WBGene00000937	435.4232348	-0.06398919	0.085226848	-0.750810239	0.452766866	0.99718055
WBGene00000938	962.6188108	-0.083167508	0.079358248	-1.048000815	0.294638232	0.99718055
WBGene00000939	909.7662983	0.033160051	0.108411381	0.305872414	0.75970179	0.99718055
WBGene00000940	409.6029228	0.019671949	0.084545104	0.232679929	0.816009956	0.99718055
WBGene00000941	157.4958204	-0.087036135	0.116336803	-0.748139306	0.454376136	0.99718055
WBGene00000942	10.32331979	0.052055142	0.146050244	0.356419411	0.721526495	0.99718055
WBGene00000950	3.895179925	0.168824759	0.119248222	1.415742357	0.156850952	0.99718055
WBGene00000951	4.513250092	-0.201150891	0.113192154	-1.777074508	0.075555982	0.99718055
WBGene00000952	1.173016784	0.019467704	0.066536593	0.292586432	0.769838286	0.99718055
WBGene00000953	0.457232467	-0.009214043	0.035938732	-0.256381975	0.797655904	0.99718055
WBGene00000955	1.182693553	-0.02937151	0.066064817	-0.444586256	0.656618782	0.99718055
WBGene00000958	2.517921442	-0.02463119	0.098959994	-0.248900481	0.803437763	0.99718055
WBGene00000959	241.2708811	-0.040129082	0.146300737	-0.274291731	0.783860439	0.99718055
WBGene00000960	0.505431551	0.010799703	0.042419125	0.254595143	0.799035811	0.99718055
WBGene00000961	526.5774966	0.039231825	0.120061931	0.326763239	0.743846966	0.99718055
WBGene00000962	3873.292145	0.099182362	0.114112796	0.869160737	0.38475922	0.99718055
WBGene00000963	0.849245886	0.016732371	0.060887997	0.274805748	0.783465482	0.99718055
WBGene00000964	2.30792936	0.04549268	0.09038092	0.50334384	0.614722549	0.99718055
WBGene00000965	239.6093421	-0.055784503	0.107104787	-0.520840422	0.602477941	0.99718055
WBGene00000966	1.885885692	0.072695614	0.087561083	0.830227438	0.406410205	0.99718055
WBGene00000967	38.02612697	0.076645396	0.156737433	0.489005048	0.624838123	0.99718055
WBGene00000968	4.269303606	-0.086615323	0.117962238	-0.734263137	0.46278838	0.99718055
WBGene00000969	6.43802487	0.027757527	0.132227289	0.209922835	0.833727899	0.99718055
WBGene00000970	170.5795787	0.113356769	0.140864784	0.804720431	0.420981027	0.99718055
WBGene00000971	3.18335438	-0.027727377	0.101838657	-0.272267696	0.785416193	0.99718055
WBGene00000972	17.6673508	-0.07238077	0.155938329	-0.464162793	0.642531116	0.99718055
WBGene00000973	137.6659977	0.060454769	0.156586087	0.386080078	0.699437363	0.99718055
WBGene00000974	54.65406119	0.07131606	0.150493125	0.473882513	0.63558369	0.99718055
WBGene00000975	163.089112	-0.059709137	0.124284021	-0.480424884	0.630925304	0.99718055
WBGene00000976	128.1854745	0.106358368	0.12185087	0.872856855	0.382741105	0.99718055
WBGene00000977	1.890652198	0.041106302	0.087542491	0.469558278	0.638670639	0.99718055
WBGene00000978	0.357690871	0.014547975	0.034277271	0.424420468	0.671259196	0.99718055
WBGene00000980	27.90082309	0.029167867	0.156208152	0.18672436	0.851876755	0.99718055
WBGene00000981	1.91038626	-0.067535552	0.087209489	-0.774406003	0.438690735	0.99718055
WBGene00000982	119.6524762	-0.178475887	0.118492037	-1.506226839	0.132008952	0.99718055
WBGene00000983	0.238785547	0.006683352	0.027179963	0.245892606	0.805765368	0.99718055
WBGene00000984	1.880001504	0.045594891	0.08286646	0.550221294	0.5821676	0.99718055
WBGene00000985	203.3508139	0.040623608	0.124705841	0.325755457	0.744609382	0.99718055
WBGene00000986	1.139727249	-0.083750233	0.070851643	-1.182050691	0.237185588	0.99718055
WBGene00000987	298.8586643	-0.029137187	0.104267043	-0.279447718	0.779901255	0.99718055
WBGene00000988	23.58096768	-0.024012654	0.156849666	-0.153093435	0.878324593	0.99718055
WBGene00000989	3.068441285	0.010244436	0.10666266	0.096045195	0.923484678	0.99718055
WBGene00000990	8.155700923	0.088042158	0.143128846	0.615125185	0.538472051	0.99718055
WBGene00000991	3.988653404	-0.090425176	0.106276992	-0.850844327	0.394855834	0.99718055
WBGene00000992	3.840914611	0.041291325	0.103351203	0.399524377	0.689506865	0.99718055
WBGene00000993	77.68936946	0.081459587	0.130288842	0.625223045	0.531824679	0.99718055
WBGene00000994	392.9983576	0.109820181	0.086906337	1.263661377	0.206351594	0.99718055
WBGene00000995	182.2547393	0.077978113	0.148001646	0.526873284	0.598281587	0.99718055
WBGene00000996	154.3017626	0.157799875	0.119329991	1.322382359	0.18604086	0.99718055
WBGene00000998	9.602486628	-0.097077048	0.147578017	-0.657801548	0.51066566	0.99718055
WBGene00001000	12.34626137	-0.116954654	0.153336405	-0.762732459	0.445622968	0.99718055
WBGene00001001	755.9941295	0.056132249	0.081646605	0.687502543	0.491766099	0.99718055
WBGene00001002	465.3291519	0.12258932	0.105678884	1.160017166	0.246041817	0.99718055
WBGene00001005	287.3969246	0.146805521	0.095443721	1.53813703	0.124015114	0.99718055
WBGene00001006	45.23814466	-0.01354403	0.152008352	-0.089100566	0.929001987	0.99718055
WBGene00001007	681.3247925	0.027045465	0.117817301	0.229554272	0.818438144	0.99718055
WBGene00001008	5053.467428	-0.190020844	0.099978899	-1.900609496	0.057353181	0.99718055
WBGene00001016	1182.780577	0.119254671	0.123837304	0.962994732	0.335550167	0.99718055
WBGene00001017	1177.065954	0.031669144	0.104199408	0.303928247	0.761182557	0.99718055
WBGene00001018	152.921366	-0.031666456	0.139659114	-0.226741065	0.820625093	0.99718055
WBGene00001019	281.7615349	-0.037045964	0.101858767	-0.363699319	0.716082552	0.99718055
WBGene00001020	243.8427846	0.003008203	0.099408963	0.030260882	0.975858994	0.99718055
WBGene00001021	63.86918312	-0.208622784	0.14405412	-1.448225041	0.147554124	0.99718055
WBGene00001022	103.4049185	0.124679185	0.145194985	0.858701731	0.390505095	0.99718055
WBGene00001023	761.6700971	0.108832862	0.077253942	1.408767762	0.158903851	0.99718055
WBGene00001025	795.1247435	-0.092174925	0.100130901	-0.920544246	0.357288422	0.99718055
WBGene00001026	349.2812526	-0.027776734	0.080849118	-0.343562615	0.731175244	0.99718055
WBGene00001027	503.1614404	0.024043362	0.101059024	0.237914057	0.811947752	0.99718055
WBGene00001028	711.6869788	-0.020493893	0.087740903	-0.233572852	0.815316606	0.99718055
WBGene00001029	615.4398373	0.125690306	0.112054519	1.121688867	0.261994752	0.99718055
WBGene00001030	774.9097896	0.105397357	0.125806908	0.837770824	0.402159428	0.99718055
WBGene00001031	875.5805131	0.045992064	0.117662048	0.390882742	0.695883911	0.99718055
WBGene00001032	55.93886995	-0.039013243	0.156517417	-0.249258155	0.803161097	0.99718055
WBGene00001033	84.0266961	0.0428716	0.132997367	0.322349241	0.747188133	0.99718055
WBGene00001034	738.0251653	0.10094502	0.088973318	1.134553845	0.256562301	0.99718055
WBGene00001035	392.8460415	0.04155057	0.082239366	0.505239428	0.613390681	0.99718055
WBGene00001036	183.0789103	0.06568211	0.129007788	0.509132907	0.610659067	0.99718055
WBGene00001037	683.5960119	0.0599136	0.104490978	0.573385393	0.566383779	0.99718055
WBGene00001038	135.3855378	0.149234343	0.117940402	1.265336904	0.205750583	0.99718055
WBGene00001039	62.72625751	0.126568801	0.150064427	0.84342974	0.398988145	0.99718055
WBGene00001040	339.9752267	0.021666856	0.110556471	0.195979994	0.844625825	0.99718055
WBGene00001041	460.0153776	-0.044505275	0.096972144	-0.458949069	0.646270741	0.99718055
WBGene00001042	3289.211295	0.065262083	0.121824423	0.535706075	0.592161705	0.99718055
WBGene00001043	347.5910651	0.093322823	0.115294867	0.809427389	0.418269353	0.99718055
WBGene00001044	272.6539268	0.093759669	0.104318099	0.898786212	0.368766546	0.99718055
WBGene00001045	41.21681064	-0.041612296	0.154468243	-0.269390622	0.787629102	0.99718055
WBGene00001046	117.7220057	-0.030632362	0.129897356	-0.235819748	0.813572544	0.99718055
WBGene00001047	490.594712	0.091838169	0.115220239	0.797066294	0.425412531	0.99718055
WBGene00001048	272.3500475	-0.0514249	0.099429099	-0.517201708	0.60501536	0.99718055
WBGene00001049	1254.976136	0.037973919	0.112152683	0.338591269	0.734917661	0.99718055
WBGene00001050	370.6757165	-0.051120603	0.116113904	-0.440262545	0.659746965	0.99718055
WBGene00001051	273.7523785	0.085039714	0.10912866	0.779261047	0.435825956	0.99718055
WBGene00001052	0.339351325	0.01465251	0.034420836	0.425687228	0.67033577	0.99718055
WBGene00001053	0.850994207	0.010416998	0.054505523	0.191118217	0.848432976	0.99718055
WBGene00001054	0.694049623	0.005774923	0.058827511	0.098167047	0.921799649	0.99718055
WBGene00001055	0.429206296	-0.030156948	0.035764918	-0.843199133	0.399117083	0.99718055
WBGene00001056	396.7680141	0.083665622	0.080600653	1.038026592	0.299257675	0.99718055
WBGene00001057	329.1952426	-0.039848254	0.086907179	-0.458515103	0.646582414	0.99718055
WBGene00001058	307.3914345	0.031947133	0.097519486	0.327597426	0.743216068	0.99718055
WBGene00001059	2.110983399	0.013414126	0.088567902	0.151455838	0.879616145	0.99718055
WBGene00001060	597.3048038	0.114998492	0.107510094	1.069652974	0.284775541	0.99718055
WBGene00001061	781.7615891	0.171269909	0.100442496	1.705153856	0.088165733	0.99718055
WBGene00001062	0.137146931	0.004261962	0.027179963	0.156805309	0.875398289	0.99718055
WBGene00001064	1.912354707	0.006473638	0.070654358	0.091624037	0.926996753	0.99718055
WBGene00001065	0.514631159	0.032085218	0.041808178	0.767438792	0.442820672	0.99718055
WBGene00001066	2.387281115	0.057844928	0.096643889	0.598536842	0.549481784	0.99718055
WBGene00001067	2.589971158	0.075057726	0.098400155	0.762780561	0.445594276	0.99718055
WBGene00001068	2.310242746	0.012542487	0.095532223	0.131290638	0.895545397	0.99718055
WBGene00001069	0.417074349	-0.00989581	0.035663837	-0.277474622	0.78141569	0.99718055
WBGene00001070	0.367580168	-0.017231858	0.040255868	-0.428058296	0.668608679	0.99718055
WBGene00001071	6.414432776	0.042821208	0.134334715	0.318765021	0.749904704	0.99718055
WBGene00001072	90.82069275	-0.011521051	0.147325954	-0.078201095	0.937668091	0.99718055
WBGene00001073	171.9840502	-0.031543112	0.113456468	-0.27801951	0.780997382	0.99718055
WBGene00001074	20.92690853	0.042293115	0.155556497	0.271882667	0.785712239	0.99718055
WBGene00001075	2.525213325	0.07701858	0.101355246	0.759887447	0.447321865	0.99718055
WBGene00001076	5.214201545	-0.031432464	0.122650581	-0.256276517	0.797737329	0.99718055
WBGene00001077	11.28914257	-0.042423351	0.142316557	-0.298091465	0.765633356	0.99718055
WBGene00001078	9.539774263	-0.058719805	0.1428822	-0.410966554	0.68109706	0.99718055
WBGene00001079	0.474378673	-0.005358513	0.029865068	-0.179424107	0.857604704	0.99718055
WBGene00001080	1031.895961	0.090496558	0.11213343	0.807043513	0.419641414	0.99718055
WBGene00001081	208.683712	0.05739205	0.124734949	0.460112029	0.64543581	0.99718055
WBGene00001082	86.92786737	-0.075696795	0.151520096	-0.499582547	0.61736905	0.99718055
WBGene00001085	1367.516771	0.102999398	0.137109372	0.751220699	0.452519845	0.99718055
WBGene00001086	122.8637451	0.276578674	0.132119506	2.093397727	0.036313665	0.99718055
WBGene00001087	690.8690171	0.036469313	0.08390548	0.434647571	0.663818259	0.99718055
WBGene00001088	279.9611378	0.04014808	0.106373005	0.377427336	0.705856055	0.99718055
WBGene00001089	37.7984221	-0.236692188	0.156288547	-1.514456386	0.129910127	0.99718055
WBGene00001090	1007.875709	0.060574848	0.128359494	0.471915602	0.636987031	0.99718055
WBGene00001091	51.21105629	-0.153237259	0.156501705	-0.979141148	0.327510243	0.99718055
WBGene00001092	586.9346879	0.059397674	0.13890201	0.427622853	0.668925725	0.99718055
WBGene00001093	1282.614831	0.068482867	0.093782528	0.730230553	0.46524927	0.99718055
WBGene00001094	405.2465987	0.00320724	0.097228128	0.032986745	0.973685157	0.99718055
WBGene00001095	210.6761037	0.151969682	0.108196338	1.404573252	0.160148215	0.99718055
WBGene00001096	0.494103454	-0.015972468	0.047145484	-0.338791057	0.734767139	0.99718055
WBGene00001099	23.05206292	-0.138252698	0.156639464	-0.882617278	0.37744309	0.99718055
WBGene00001101	77.33833563	-0.137052458	0.137679427	-0.995446168	0.319519314	0.99718055
WBGene00001102	897.7889591	0.129817534	0.126137443	1.029175246	0.303397332	0.99718055
WBGene00001103	3.468331315	0.062155731	0.099015847	0.627735189	0.530177429	0.99718055
WBGene00001104	7.934647814	0.105324882	0.136045076	0.774191061	0.438817814	0.99718055
WBGene00001106	0.268310809	-0.012687716	0.027179963	-0.466804039	0.640640086	0.99718055
WBGene00001107	0.610280112	0.019041976	0.043684653	0.435896244	0.66291201	0.99718055
WBGene00001108	1.191428062	-0.05460307	0.064868449	-0.841750817	0.399927447	0.99718055
WBGene00001109	0.42450454	0.006299341	0.035547985	0.1772067	0.859346033	0.99718055
WBGene00001110	2040.801876	0.074977292	0.124054319	0.604390818	0.545583839	0.99718055
WBGene00001111	4546.049739	0.006246544	0.129480705	0.048243052	0.96152254	0.99718055
WBGene00001112	1231.41509	-0.039546111	0.071001077	-0.55697904	0.57754175	0.99718055
WBGene00001113	3.234438492	0.146237414	0.104909485	1.393938915	0.163336052	0.99718055
WBGene00001115	22.43947718	0.072110405	0.156841798	0.45976523	0.645684743	0.99718055
WBGene00001116	4.28797841	-0.156542831	0.121909053	-1.284095209	0.199108644	0.99718055
WBGene00001117	6.600104964	0.008643102	0.121969942	0.070862556	0.943507144	0.99718055
WBGene00001118	85.56489265	-0.064693582	0.145922516	-0.443342011	0.657518373	0.99718055
WBGene00001119	442.429597	-0.283886493	0.103929503	-2.73152939	0.006304112	0.99718055
WBGene00001121	6.083497109	0.132835038	0.110437884	1.202803187	0.229052491	0.99718055
WBGene00001122	6.56880841	-0.006308113	0.136687902	-0.046149753	0.963190891	0.99718055
WBGene00001123	0.760991302	-0.026193555	0.045682805	-0.573378868	0.566388196	0.99718055
WBGene00001127	1.066124871	0.04007743	0.068621835	0.584033193	0.55919798	0.99718055
WBGene00001129	8.288808782	-0.095237438	0.13197004	-0.721659539	0.470503824	0.99718055
WBGene00001130	101.4422477	0.247623561	0.135653811	1.825408072	0.067939472	0.99718055
WBGene00001133	1.255997456	0.00910688	0.067600838	0.134715488	0.892836827	0.99718055
WBGene00001134	1143.720034	0.060488378	0.094529919	0.639886064	0.522246675	0.99718055
WBGene00001135	2.204399229	-0.166958286	0.094858846	-1.760070808	0.078395802	0.99718055
WBGene00001136	16.94682749	-0.174338211	0.153541579	-1.135446261	0.256188386	0.99718055
WBGene00001137	667.6875889	0.124734887	0.08314223	1.500259106	0.133547298	0.99718055
WBGene00001145	332.7622233	0.004051452	0.142344474	0.028462308	0.97729343	0.99718055
WBGene00001148	30.07328229	-0.136862794	0.155036961	-0.882775265	0.377357707	0.99718055
WBGene00001150	2.74668465	-0.201901913	0.0991389	-2.036555902	0.041694566	0.99718055
WBGene00001151	204.3531096	0.051618421	0.124618426	0.414211789	0.678719009	0.99718055
WBGene00001152	58.22248245	0.028342426	0.138966092	0.203952099	0.838390932	0.99718055
WBGene00001153	271.0164674	-0.162188251	0.110767422	-1.464223398	0.143132919	0.99718055
WBGene00001154	87.87067225	0.06391223	0.131751256	0.485097691	0.62760705	0.99718055
WBGene00001155	87.42266136	0.201586109	0.133249809	1.51284351	0.130319414	0.99718055
WBGene00001156	1.441974433	-0.021980761	0.078927757	-0.278492156	0.780634586	0.99718055
WBGene00001157	1.456301168	0.005423075	0.062208695	0.087175512	0.930532004	0.99718055
WBGene00001159	2.198297983	-0.160602549	0.086609625	-1.8543268	0.06369242	0.99718055
WBGene00001160	499.8393151	0.01636484	0.107884987	0.151687831	0.879433155	0.99718055
WBGene00001161	381.1648709	0.138286557	0.1201406	1.151039338	0.249716052	0.99718055
WBGene00001162	288.7377327	0.054523373	0.095783496	0.569235569	0.569196286	0.99718055
WBGene00001163	6.476100376	0.061787941	0.133394578	0.463196793	0.643223314	0.99718055
WBGene00001164	4.024106296	0.021210914	0.106741967	0.198712042	0.842488003	0.99718055
WBGene00001165	7.766534242	-0.130551473	0.141053082	-0.925548536	0.354680649	0.99718055
WBGene00001166	788.1625472	-0.021557768	0.130926004	-0.164656118	0.869214658	0.99718055
WBGene00001167	1120.860083	-0.188667272	0.081207538	-2.323272883	0.020164498	0.99718055
WBGene00001168	528.4676732	0.054682763	0.096225427	0.568277683	0.56984643	0.99718055
WBGene00001169	30.33595649	0.133499722	0.156921513	0.850741998	0.394912688	0.99718055
WBGene00001170	11.357975	0.174048097	0.143344338	1.214195827	0.224672954	0.99718055
WBGene00001171	46.16725861	-0.190743821	0.151043018	-1.262844349	0.206645123	0.99718055
WBGene00001172	12.44006034	-0.175283796	0.150205434	-1.166960416	0.243226356	0.99718055
WBGene00001173	497.4581799	0.119632693	0.105425979	1.134755344	0.256477842	0.99718055
WBGene00001174	9.309605021	0.068166684	0.142874096	0.477110166	0.633283676	0.99718055
WBGene00001175	4.003827796	0.150137048	0.110698241	1.356273113	0.175012287	0.99718055
WBGene00001177	621.3377827	-0.24362784	0.130348001	-1.869056968	0.061614889	0.99718055
WBGene00001178	244.0364013	-0.259082761	0.114434794	-2.264020868	0.023572831	0.99718055
WBGene00001179	107.2157637	-0.102772417	0.135097551	-0.760727458	0.446819871	0.99718055
WBGene00001182	4.018318797	0.035168187	0.115361302	0.304852547	0.760478458	0.99718055
WBGene00001184	1.654182234	0.02843884	0.090067747	0.315749431	0.752192704	0.99718055
WBGene00001185	0.916827129	0.023032677	0.063529571	0.362550488	0.716940702	0.99718055
WBGene00001186	48.74552638	0.146187168	0.153999229	0.949272079	0.34248225	0.99718055
WBGene00001187	16.49926006	0.020689708	0.156244887	0.132418463	0.894653312	0.99718055
WBGene00001188	1557.062609	-0.127850905	0.095877226	-1.333485655	0.18237248	0.99718055
WBGene00001189	305.6216436	0.057604488	0.151234506	0.380895136	0.703281062	0.99718055
WBGene00001190	16.01256333	-0.129332598	0.140261674	-0.922080809	0.356486426	0.99718055
WBGene00001193	50.20217254	0.227326179	0.149799295	1.517538373	0.129130813	0.99718055
WBGene00001194	1052.270975	0.033265576	0.086951849	0.382574681	0.702035146	0.99718055
WBGene00001196	953.1606565	0.055584686	0.126608044	0.439029653	0.66064005	0.99718055
WBGene00001202	10.86379819	-0.115064805	0.128002544	-0.898925917	0.368692122	0.99718055
WBGene00001204	18.16182213	0.099457548	0.15492	0.641992949	0.520877761	0.99718055
WBGene00001207	1.477678025	0.064896589	0.072664855	0.893094592	0.371806519	0.99718055
WBGene00001208	5.991355377	0.06547474	0.13079817	0.500578412	0.616667858	0.99718055
WBGene00001209	677.2886826	0.066473063	0.124211734	0.535159283	0.592539719	0.99718055
WBGene00001211	0.465273801	0.020368241	0.035794833	0.569027406	0.569337542	0.99718055
WBGene00001214	1902.999764	0.015687565	0.085054321	0.184441722	0.853666942	0.99718055
WBGene00001215	4095.178659	-0.117489331	0.05997511	-1.958968185	0.050116513	0.99718055
WBGene00001223	0.480434536	-0.027238921	0.036056545	-0.755450132	0.449978943	0.99718055
WBGene00001224	594.9218509	0.103053504	0.125320539	0.822319344	0.41089517	0.99718055
WBGene00001225	698.8181389	0.00703074	0.119300469	0.058933047	0.953005436	0.99718055
WBGene00001226	1081.232111	0.150574839	0.083469447	1.803951547	0.071238903	0.99718055
WBGene00001227	342.9684421	-0.003695693	0.116843456	-0.031629443	0.974767563	0.99718055
WBGene00001228	578.9666663	0.131753584	0.091504025	1.439866544	0.14990516	0.99718055
WBGene00001229	365.1205637	0.068873286	0.091416729	0.753399156	0.45121009	0.99718055
WBGene00001230	462.6752797	0.1245365	0.104538809	1.191294426	0.233538021	0.99718055
WBGene00001231	238.1878258	0.223566357	0.089318088	2.503035626	0.012313315	0.99718055
WBGene00001232	377.7280817	0.071031967	0.092200417	0.770408303	0.44105773	0.99718055
WBGene00001233	196.5473778	0.078560738	0.117252407	0.670013863	0.502848953	0.99718055
WBGene00001234	455.950612	0.181942895	0.082688599	2.200338333	0.0277829	0.99718055
WBGene00001235	370.9441487	-0.101949275	0.098626204	-1.033693589	0.301279431	0.99718055
WBGene00001236	167.295152	0.028683677	0.139814764	0.20515485	0.837451143	0.99718055
WBGene00001237	11.63183748	0.214398385	0.146399391	1.464475932	0.143063955	0.99718055
WBGene00001239	118.2538708	-0.090039358	0.125351447	-0.718295322	0.472575214	0.99718055
WBGene00001240	10.7893696	-0.117568019	0.144260264	-0.814971608	0.415088562	0.99718055
WBGene00001241	196.4848301	0.163798103	0.100407876	1.631327228	0.102821291	0.99718055
WBGene00001242	9.990536814	-0.022936722	0.134537036	-0.170486303	0.864627705	0.99718055
WBGene00001243	26.76803658	-0.038492893	0.156730969	-0.245598512	0.805993041	0.99718055
WBGene00001244	55.3088269	-0.055446961	0.156313468	-0.354716468	0.722802013	0.99718055
WBGene00001245	2.24070746	0.020005343	0.097468453	0.205249414	0.837377265	0.99718055
WBGene00001246	6.52846647	-0.093919752	0.123703959	-0.75922996	0.447715007	0.99718055
WBGene00001247	1202.290244	0.068773744	0.142482596	0.482681719	0.629321746	0.99718055
WBGene00001248	14.34337913	-0.090109102	0.146010164	-0.617142667	0.537140628	0.99718055
WBGene00001249	37.57840308	0.023148468	0.154949882	0.149393262	0.881243328	0.99718055
WBGene00001250	2.722856142	0.021767646	0.096414518	0.22577146	0.821379176	0.99718055
WBGene00001251	1.891789061	-0.045253243	0.088731354	-0.510002845	0.610049469	0.99718055
WBGene00001252	0.137146931	0.004261962	0.027179963	0.156805309	0.875398289	0.99718055
WBGene00001253	10.99922972	0.010288818	0.150549427	0.068341793	0.945513556	0.99718055
WBGene00001258	537.8580447	0.095387268	0.090119536	1.058452723	0.289849094	0.99718055
WBGene00001259	1263.042144	0.09582936	0.087927497	1.089867936	0.275771323	0.99718055
WBGene00001262	473.4503806	-0.007782345	0.094928311	-0.081981289	0.934661593	0.99718055
WBGene00001263	3.347452035	-0.027884683	0.092818837	-0.300420513	0.763856419	0.99718055
WBGene00001281	985.1449953	0.046544928	0.115223531	0.403953324	0.686247043	0.99718055
WBGene00001284	1220.147654	0.026810643	0.132104041	0.202950967	0.839173357	0.99718055
WBGene00001303	115.2496922	0.200182172	0.13453737	1.487929877	0.136769387	0.99718055
WBGene00001309	227.5586133	-0.084628991	0.100841607	-0.839226923	0.401341982	0.99718055
WBGene00001310	53.94442335	0.057440014	0.14217788	0.404001063	0.686211938	0.99718055
WBGene00001311	14.25148648	0.214841776	0.144434599	1.487467523	0.136891375	0.99718055
WBGene00001320	292.8417891	0.087400042	0.111522756	0.783696931	0.433217964	0.99718055
WBGene00001324	454.9825425	0.032199494	0.087061089	0.369849423	0.711494688	0.99718055
WBGene00001325	121.1075611	-0.125447564	0.151473981	-0.828178954	0.407569161	0.99718055
WBGene00001328	8.907744217	0.062097108	0.137089066	0.45296908	0.650571007	0.99718055
WBGene00001329	131.76531	0.020510778	0.130689932	0.156942294	0.875290327	0.99718055
WBGene00001330	203.986347	0.101296202	0.118129312	0.857502684	0.391167132	0.99718055
WBGene00001331	17.79779294	0.042782214	0.15318484	0.27928491	0.780026186	0.99718055
WBGene00001332	513.8987279	0.090549859	0.106709916	0.848560873	0.396125687	0.99718055
WBGene00001333	549.4047882	0.122471629	0.088223819	1.388192332	0.165078487	0.99718055
WBGene00001334	95.13384865	0.092959876	0.132449873	0.701849495	0.482773028	0.99718055
WBGene00001335	204.8527486	-0.143899521	0.144866684	-0.993323773	0.320552196	0.99718055
WBGene00001336	428.6423367	0.025285545	0.123964557	0.203973987	0.838373827	0.99718055
WBGene00001337	547.0124306	0.005016851	0.108876429	0.046078392	0.963247768	0.99718055
WBGene00001338	181.8513542	-0.055866557	0.10345554	-0.540005467	0.589193262	0.99718055
WBGene00001340	369.6983398	0.163434489	0.102830247	1.589362015	0.111978685	0.99718055
WBGene00001345	14.27656298	0.100285581	0.147016275	0.682139317	0.495150862	0.99718055
WBGene00001352	719.1028319	0.089150859	0.0937449	0.950994226	0.341607307	0.99718055
WBGene00001358	129.7394428	-0.112623427	0.138673772	-0.812146558	0.416707541	0.99718055
WBGene00001365	370.5556304	0.106432692	0.097638901	1.090064419	0.275684768	0.99718055
WBGene00001366	2.697900544	-0.123459429	0.092296995	-1.337632172	0.181016372	0.99718055
WBGene00001368	164.8446293	-0.149972864	0.11842719	-1.266371893	0.205379969	0.99718055
WBGene00001371	192.8689355	0.071720518	0.128854884	0.556599145	0.577801338	0.99718055
WBGene00001374	0.608691348	0.036912652	0.043382135	0.850872178	0.394840361	0.99718055
WBGene00001377	11.9763585	0.042754155	0.145582942	0.293675578	0.769005818	0.99718055
WBGene00001385	2.233065181	-0.024760594	0.088397642	-0.280104688	0.779397188	0.99718055
WBGene00001386	0.489293806	0.009813811	0.0420332	0.233477612	0.815390553	0.99718055
WBGene00001387	0.173082329	0.004261962	0.027179963	0.156805309	0.875398289	0.99718055
WBGene00001388	0.358030366	-0.000945714	0.034600525	-0.02733237	0.978194639	0.99718055
WBGene00001389	0.446769518	0.020278159	0.035715084	0.567775755	0.570187245	0.99718055
WBGene00001390	0.273178058	-0.010266327	0.027179963	-0.377716742	0.705641029	0.99718055
WBGene00001391	0.214216079	0.006683352	0.027179963	0.245892606	0.805765368	0.99718055
WBGene00001392	43.04363814	-0.011322328	0.156952493	-0.072138567	0.942491634	0.99718055
WBGene00001393	171.163827	0.064169484	0.1247339	0.514451034	0.606936686	0.99718055
WBGene00001394	168.2364386	0.003024422	0.135142774	0.022379456	0.982145268	0.99718055
WBGene00001395	11.11672019	-0.006002628	0.143300302	-0.041888453	0.966587621	0.99718055
WBGene00001396	198.3634798	0.152763541	0.103113616	1.481506975	0.138471528	0.99718055
WBGene00001397	2.810656545	0.033877432	0.102594389	0.330207452	0.741243216	0.99718055
WBGene00001398	4.335930234	-0.076822883	0.108177166	-0.710158032	0.477606143	0.99718055
WBGene00001399	1.175821411	0.00973334	0.070165215	0.1387203	0.889671176	0.99718055
WBGene00001400	2.159013908	0.058969077	0.082480436	0.714946233	0.474642267	0.99718055
WBGene00001401	923.783969	-0.116728196	0.094961053	-1.229221789	0.218988662	0.99718055
WBGene00001402	1039.122012	0.039591669	0.090184153	0.439009164	0.660654896	0.99718055
WBGene00001403	4.256568572	0.032949826	0.106842424	0.308396465	0.757780672	0.99718055
WBGene00001404	142.0488315	0.021903401	0.139190889	0.15736232	0.874959308	0.99718055
WBGene00001405	83.53585035	-0.07691104	0.126315372	-0.608881081	0.542603265	0.99718055
WBGene00001406	600.0177629	-0.041737788	0.0792698	-0.52652824	0.598521236	0.99718055
WBGene00001410	6.204564783	0.018031549	0.134961105	0.133605524	0.893714516	0.99718055
WBGene00001411	715.2410332	-0.054545802	0.092774822	-0.587937557	0.556574207	0.99718055
WBGene00001412	315.8618651	0.128760478	0.111696965	1.152766123	0.249006393	0.99718055
WBGene00001413	152.2047111	0.109246312	0.135167551	0.808228832	0.418958863	0.99718055
WBGene00001414	16.29593758	-0.016734903	0.155943267	-0.107314044	0.914539843	0.99718055
WBGene00001423	1450.696539	0.041340907	0.091961704	0.449544811	0.65303869	0.99718055
WBGene00001424	2.051260701	-0.014407105	0.057787115	-0.249313458	0.803118322	0.99718055
WBGene00001425	25.77620035	-0.078838688	0.138515737	-0.569167732	0.569242317	0.99718055
WBGene00001427	1281.544196	-0.050753322	0.098250525	-0.516570489	0.605456021	0.99718055
WBGene00001428	2.001036551	-0.014286613	0.093634065	-0.152579221	0.878730112	0.99718055
WBGene00001429	0.208778423	0.006683352	0.027179963	0.245892606	0.805765368	0.99718055
WBGene00001430	251.9974894	-0.182034025	0.138244126	-1.316757751	0.187919839	0.99718055
WBGene00001431	634.9711004	0.049618411	0.128954005	0.384776032	0.700403358	0.99718055
WBGene00001432	4.285508968	0.104573969	0.12161513	0.85987631	0.389857228	0.99718055
WBGene00001433	42912.24005	-0.009641554	0.106086846	-0.090883592	0.927585088	0.99718055
WBGene00001434	2.871746986	-0.032354629	0.085082739	-0.380272531	0.703743124	0.99718055
WBGene00001435	32.91718139	-0.255514647	0.15677425	-1.629825348	0.103138415	0.99718055
WBGene00001436	26.34460915	0.292313895	0.1549096	1.886996641	0.059160777	0.99718055
WBGene00001437	4.797201219	-0.117124191	0.125838664	-0.930748844	0.351983497	0.99718055
WBGene00001438	0.59940909	0.018670386	0.044753598	0.417181781	0.676545451	0.99718055
WBGene00001439	66.30056454	-0.17569745	0.140400269	-1.251403941	0.21078714	0.99718055
WBGene00001440	17.49201513	0.032589953	0.151325846	0.215362767	0.829484497	0.99718055
WBGene00001441	10.69821267	-0.061359518	0.1404737	-0.43680431	0.662253273	0.99718055
WBGene00001442	8.620794117	-0.026623505	0.131260933	-0.20282886	0.8392688	0.99718055
WBGene00001443	733.8073596	-0.011776815	0.110991101	-0.106105936	0.915498302	0.99718055
WBGene00001447	0.34971067	0.014568351	0.034302517	0.424702088	0.671053861	0.99718055
WBGene00001448	0.135466255	0.004261962	0.027179963	0.156805309	0.875398289	0.99718055
WBGene00001451	1.480995234	0.026215637	0.072741676	0.360393641	0.718552781	0.99718055
WBGene00001452	10.05629369	0.039834967	0.143035394	0.27849727	0.78063066	0.99718055
WBGene00001453	5.101105211	0.024197771	0.11489748	0.210603147	0.833196957	0.99718055
WBGene00001454	0.127811073	0.004261962	0.027179963	0.156805309	0.875398289	0.99718055
WBGene00001455	0.236615684	-0.003002182	0.027179963	-0.110455716	0.912047968	0.99718055
WBGene00001456	0.667364124	0.030345507	0.038893232	0.780225902	0.435257918	0.99718055
WBGene00001457	8.362597425	-0.187692161	0.142570236	-1.316489098	0.188009935	0.99718055
WBGene00001459	2990.842251	-0.114737948	0.119724978	-0.958345948	0.337888342	0.99718055
WBGene00001460	0.3603987	-0.012483674	0.033975906	-0.367427262	0.713300339	0.99718055
WBGene00001461	3.461314301	-0.165590198	0.108871257	-1.520972595	0.128266715	0.99718055
WBGene00001462	1.605734403	-0.021581639	0.072434974	-0.297945002	0.76574514	0.99718055
WBGene00001465	3.493585926	0.058391557	0.113073365	0.516404166	0.605572156	0.99718055
WBGene00001466	3.200335228	-0.072204974	0.108734127	-0.664050711	0.506657855	0.99718055
WBGene00001468	104.1939937	-0.161463708	0.154736925	-1.043472389	0.296729562	0.99718055
WBGene00001470	91.58517965	0.175002157	0.135328123	1.293169176	0.195952554	0.99718055
WBGene00001475	16.70337144	0.004782624	0.153121814	0.031234112	0.975082836	0.99718055
WBGene00001476	5.898578724	0.008474238	0.132534	0.063940105	0.949017918	0.99718055
WBGene00001477	0.319626386	-0.015858982	0.033711427	-0.470433421	0.638045391	0.99718055
WBGene00001478	39.05129266	0.090513541	0.146454018	0.618033852	0.536553024	0.99718055
WBGene00001479	7.055623374	0.127543614	0.138440707	0.921286935	0.356900641	0.99718055
WBGene00001480	1186.950724	-0.131095188	0.136277892	-0.961969592	0.336064879	0.99718055
WBGene00001481	162.896809	0.090615863	0.140114511	0.646727182	0.517808528	0.99718055
WBGene00001482	133.3496386	-0.012669019	0.135927572	-0.093204185	0.925741349	0.99718055
WBGene00001483	2.621959296	0.110523451	0.09785159	1.129500822	0.258686623	0.99718055
WBGene00001484	25.4819337	0.067896982	0.155304563	0.437186007	0.661976457	0.99718055
WBGene00001485	862.5115921	-0.150550437	0.075122163	-2.004074841	0.045062044	0.99718055
WBGene00001487	3.302687837	-0.084339689	0.07854622	-1.073758728	0.282930832	0.99718055
WBGene00001488	10915.75463	-0.154937547	0.06427059	-2.410706775	0.015921643	0.99718055
WBGene00001489	48.49613175	-0.03208084	0.155383431	-0.206462427	0.836429711	0.99718055
WBGene00001490	9.60257127	-0.062853165	0.137263035	-0.457903068	0.647022083	0.99718055
WBGene00001491	380.2746926	0.043930039	0.111944132	0.392428245	0.69474182	0.99718055
WBGene00001492	15.76179075	0.007822685	0.155684339	0.050247088	0.959925488	0.99718055
WBGene00001493	117.0488194	0.093872698	0.136991876	0.685242813	0.493190712	0.99718055
WBGene00001494	43.89717286	-0.01274934	0.154204908	-0.082677916	0.934107646	0.99718055
WBGene00001495	8.445186961	-0.091089263	0.139836077	-0.651400306	0.514788113	0.99718055
WBGene00001496	389.4122495	-0.017467586	0.088801846	-0.196702965	0.84405999	0.99718055
WBGene00001497	573.0122283	0.048838173	0.121122646	0.403212566	0.686791857	0.99718055
WBGene00001498	423.6962237	0.031696909	0.105023581	0.301807546	0.762798778	0.99718055
WBGene00001499	388.3225953	0.010931459	0.08590819	0.127245829	0.898745834	0.99718055
WBGene00001500	1.343482448	-0.097500776	0.070726409	-1.378562514	0.168029681	0.99718055
WBGene00001501	17.61325752	-0.165238592	0.152529127	-1.083324842	0.278664262	0.99718055
WBGene00001503	325.4650389	0.120075666	0.101260282	1.185812084	0.235696518	0.99718055
WBGene00001505	4.81015113	-0.023666829	0.1174317	-0.201536971	0.840278724	0.99718055
WBGene00001506	0.658548483	0.020414546	0.049670505	0.410999365	0.681073	0.99718055
WBGene00001507	0.291935946	0.009104741	0.027179963	0.334979903	0.737640246	0.99718055
WBGene00001508	9.087907824	-0.080854797	0.097416177	-0.82999353	0.406542441	0.99718055
WBGene00001509	977.3095151	0.021325983	0.117541784	0.18143321	0.856027553	0.99718055
WBGene00001510	889.385588	0.11378884	0.084760058	1.342481847	0.179439812	0.99718055
WBGene00001511	980.9073186	0.073645994	0.086542212	0.850983493	0.394778522	0.99718055
WBGene00001512	0.911644193	-0.004540392	0.060673093	-0.074833707	0.940347022	0.99718055
WBGene00001513	921.6841398	-0.01572132	0.124952353	-0.125818522	0.89987558	0.99718055
WBGene00001514	703.4786838	0.077926353	0.098463874	0.791420742	0.42869851	0.99718055
WBGene00001515	11.49088999	-0.021316663	0.152357142	-0.139912461	0.888729156	0.99718055
WBGene00001516	46.60511964	0.131620196	0.145766952	0.902949501	0.366552697	0.99718055
WBGene00001517	3.186215884	-0.073626374	0.105013023	-0.701116602	0.48323025	0.99718055
WBGene00001518	9.811153132	0.074868774	0.149278876	0.501536294	0.615993741	0.99718055
WBGene00001519	1.240398645	0.021008114	0.070055626	0.299877609	0.764270514	0.99718055
WBGene00001520	270.1680592	-0.170157421	0.156141295	-1.089765657	0.275816386	0.99718055
WBGene00001522	210.0558991	0.118818259	0.135179563	0.878966143	0.379419633	0.99718055
WBGene00001523	1065.2091	0.158947077	0.140362459	1.132404481	0.257464422	0.99718055
WBGene00001526	1243.799544	0.038624326	0.106112457	0.363994263	0.715862294	0.99718055
WBGene00001527	454.6041976	0.015925146	0.103066695	0.154513017	0.877205248	0.99718055
WBGene00001528	1.029367667	-0.071985657	0.062995641	-1.142708537	0.253159624	0.99718055
WBGene00001529	5.065707604	-0.04129558	0.086581582	-0.476955705	0.633393664	0.99718055
WBGene00001530	2.138745287	-0.051184198	0.081221093	-0.630183562	0.528574493	0.99718055
WBGene00001532	2.576726961	-0.064825407	0.079990383	-0.810415017	0.41770169	0.99718055
WBGene00001533	3.837802415	0.015667205	0.120899275	0.129588907	0.89689168	0.99718055
WBGene00001534	0.47052335	0.014055009	0.029791115	0.471785248	0.637080081	0.99718055
WBGene00001535	107.6364927	0.12564712	0.150747476	0.833494027	0.404566165	0.99718055
WBGene00001536	0.878564582	0.039359564	0.058079299	0.677686628	0.497970407	0.99718055
WBGene00001537	5.388054233	-0.168935269	0.130762146	-1.291927933	0.196382103	0.99718055
WBGene00001538	9.789374986	0.019019894	0.148852023	0.127777194	0.898325299	0.99718055
WBGene00001539	6.166469312	0.097817006	0.069344345	1.410598161	0.158363134	0.99718055
WBGene00001540	0.25427364	0.009104741	0.027179963	0.334979903	0.737640246	0.99718055
WBGene00001541	1.443562867	0.065057055	0.07452531	0.872952495	0.382688971	0.99718055
WBGene00001542	1.115633394	-0.009206699	0.052216869	-0.176316568	0.860045246	0.99718055
WBGene00001543	22.06785073	-0.083392101	0.156943098	-0.531352457	0.595174561	0.99718055
WBGene00001544	6.724233127	-0.069783088	0.131249193	-0.53168394	0.594944917	0.99718055
WBGene00001545	1.178940461	0.041567502	0.068449928	0.607268743	0.543672578	0.99718055
WBGene00001546	2.773781385	-0.049615588	0.093944527	-0.528137075	0.5974042	0.99718055
WBGene00001547	2.270536068	-0.012110195	0.099119846	-0.122177295	0.902758607	0.99718055
WBGene00001548	171.8968964	-0.22087309	0.142878303	-1.545882652	0.122132911	0.99718055
WBGene00001549	3.545914807	0.080803962	0.117897003	0.685377571	0.493105694	0.99718055
WBGene00001550	0.2701717	0.006683352	0.027179963	0.245892606	0.805765368	0.99718055
WBGene00001551	0.540319335	0.014441394	0.042347483	0.341021315	0.733087535	0.99718055
WBGene00001552	0.154641749	-0.005423572	0.027179963	-0.199543013	0.841838	0.99718055
WBGene00001553	23.221122	-0.040722543	0.15672977	-0.259826473	0.79499763	0.99718055
WBGene00001554	0.451363917	-0.034445154	0.03070023	-1.121983568	0.261869427	0.99718055
WBGene00001555	70.4501881	-0.062714891	0.15602818	-0.401945926	0.687723822	0.99718055
WBGene00001556	2.682489248	-0.005330068	0.094683778	-0.056293363	0.955108106	0.99718055
WBGene00001557	0.564340207	-0.010464817	0.04821183	-0.217059108	0.828162281	0.99718055
WBGene00001558	868.4635017	0.234113335	0.094398666	2.480049185	0.013136426	0.99718055
WBGene00001559	18.06847135	-0.232445167	0.156935211	-1.481153684	0.138565625	0.99718055
WBGene00001560	22.539215	-0.307956398	0.15688959	-1.962886118	0.049659408	0.99718055
WBGene00001561	1113.934433	0.1893512	0.086797255	2.18153442	0.029143911	0.99718055
WBGene00001562	204.8743441	0.186103048	0.105665247	1.761251244	0.078195888	0.99718055
WBGene00001563	1824.969962	0.077746533	0.126184324	0.616134638	0.537805663	0.99718055
WBGene00001564	16.10456131	0.172447484	0.129672733	1.329866959	0.18356211	0.99718055
WBGene00001565	172.9157451	0.181040224	0.134464877	1.346375558	0.178181429	0.99718055
WBGene00001566	693.5623735	0.017434906	0.10949023	0.159237094	0.87348208	0.99718055
WBGene00001568	863.2401949	0.010416423	0.132685516	0.078504597	0.937426673	0.99718055
WBGene00001569	208.4454517	0.14168946	0.108390526	1.307212594	0.191140519	0.99718055
WBGene00001570	6.618518002	0.044501955	0.137413741	0.323853748	0.746048762	0.99718055
WBGene00001571	1688.942344	0.069878642	0.130117598	0.537042208	0.591238459	0.99718055
WBGene00001572	2.431820322	-0.005945748	0.089115591	-0.066719504	0.946805007	0.99718055
WBGene00001574	340.9843272	0.157361725	0.098858043	1.591794861	0.111430805	0.99718055
WBGene00001575	0.55932504	0.02147511	0.051993835	0.413031856	0.679583274	0.99718055
WBGene00001577	6.648164351	0.047967141	0.128949223	0.371984725	0.709904222	0.99718055
WBGene00001578	4.477530248	-0.145676721	0.120860208	-1.205332371	0.228075018	0.99718055
WBGene00001579	107.4238434	0.077498261	0.147182336	0.526545935	0.598508945	0.99718055
WBGene00001580	1521.153655	0.067115025	0.074816136	0.897066179	0.369683604	0.99718055
WBGene00001581	48.89358798	0.168645754	0.156441619	1.078010796	0.281028938	0.99718055
WBGene00001582	287.4740286	0.117175787	0.125566521	0.933176981	0.350728598	0.99718055
WBGene00001583	1216.23614	-0.161784707	0.133682248	-1.210218333	0.226195125	0.99718055
WBGene00001584	408.865223	-0.045335941	0.122971392	-0.368670636	0.712373238	0.99718055
WBGene00001585	246.5355783	0.085305686	0.107800589	0.791328577	0.428752277	0.99718055
WBGene00001586	0.543085077	-0.030914386	0.043578278	-0.70939898	0.47807692	0.99718055
WBGene00001587	0.502966693	0.008846514	0.041901575	0.211126055	0.832788909	0.99718055
WBGene00001589	648.5920267	0.024771522	0.120517882	0.205542292	0.837148459	0.99718055
WBGene00001590	30.08755244	-0.054490585	0.154891591	-0.351798215	0.724989598	0.99718055
WBGene00001591	0.410233832	0.023067997	0.036134021	0.638401065	0.523212638	0.99718055
WBGene00001592	0.178319459	-0.005423572	0.027179963	-0.199543013	0.841838	0.99718055
WBGene00001593	4.149275386	-0.085557959	0.120795627	-0.708286893	0.478767115	0.99718055
WBGene00001594	1.271475518	-0.006652831	0.076322915	-0.08716689	0.930538857	0.99718055
WBGene00001595	755.4479209	0.109616476	0.087762775	1.249008778	0.211661863	0.99718055
WBGene00001596	1064.907717	0.11015791	0.10370359	1.06223815	0.288127585	0.99718055
WBGene00001597	602.0639385	0.011577596	0.071488613	0.161950215	0.871345059	0.99718055
WBGene00001598	2743.9347	-0.067962833	0.069353265	-0.979951457	0.327110081	0.99718055
WBGene00001599	783.2707545	0.072057197	0.118632928	0.607396264	0.543587968	0.99718055
WBGene00001600	786.4354802	0.15068036	0.118622559	1.270250463	0.203995428	0.99718055
WBGene00001601	5548.03054	-0.079542092	0.097661558	-0.814466761	0.415377607	0.99718055
WBGene00001602	55.51115221	0.180121659	0.151219291	1.191128843	0.233603008	0.99718055
WBGene00001603	1.607631398	-0.068423011	0.061117392	-1.119534214	0.262912303	0.99718055
WBGene00001604	6.919338787	-0.086603009	0.134221921	-0.645222541	0.518782981	0.99718055
WBGene00001605	1.877485949	-0.113816897	0.074713487	-1.523378192	0.127664115	0.99718055
WBGene00001606	331.8902877	-0.040605297	0.082022908	-0.495048249	0.620566063	0.99718055
WBGene00001607	368.32791	0.051845365	0.128385169	0.403826745	0.686340128	0.99718055
WBGene00001608	0.919375559	0.063288082	0.055335897	1.143707525	0.252744952	0.99718055
WBGene00001609	1281.347759	-0.078073119	0.06881253	-1.134577074	0.256552563	0.99718055
WBGene00001612	0.132715859	0.004261962	0.027179963	0.156805309	0.875398289	0.99718055
WBGene00001613	64.41817228	-0.038940548	0.144162298	-0.270116034	0.787070987	0.99718055
WBGene00001614	1.686494613	0.034828357	0.07209982	0.483057479	0.629054924	0.99718055
WBGene00001615	2.631469624	0.047913946	0.102812161	0.466033843	0.641191276	0.99718055
WBGene00001616	3.511241111	-0.031940152	0.105917547	-0.30155676	0.762989975	0.99718055
WBGene00001617	29.00231431	-0.243119185	0.156649337	-1.551996256	0.12066312	0.99718055
WBGene00001618	3.890451236	0.100249632	0.113564713	0.882753353	0.377369549	0.99718055
WBGene00001619	7.675435767	-0.031740415	0.128031723	-0.24791055	0.804203617	0.99718055
WBGene00001620	0.671650018	0.027656757	0.050477176	0.547906189	0.583756319	0.99718055
WBGene00001621	9.93089066	-0.036845229	0.119399518	-0.308587749	0.757635141	0.99718055
WBGene00001622	0.340175839	0.002568035	0.033818274	0.075936315	0.939469765	0.99718055
WBGene00001623	19.59832211	-0.098582316	0.156830047	-0.628593296	0.52961535	0.99718055
WBGene00001624	5.922344684	0.101747854	0.125168307	0.812888317	0.416282093	0.99718055
WBGene00001625	16.80686053	0.180004335	0.15440546	1.165789958	0.243699378	0.99718055
WBGene00001626	0.445417289	0.008750641	0.04171971	0.209748362	0.833864078	0.99718055
WBGene00001627	29.81421168	-0.031832777	0.156944844	-0.2028278	0.839269629	0.99718055
WBGene00001628	496.0574297	-0.214093694	0.126969634	-1.686180286	0.09176108	0.99718055
WBGene00001629	450.6884562	-0.03016658	0.079068278	-0.381525695	0.702813209	0.99718055
WBGene00001630	179.1047219	0.104930228	0.109413023	0.959028694	0.33754429	0.99718055
WBGene00001631	18.10930253	-0.005944794	0.141674464	-0.04196094	0.966529836	0.99718055
WBGene00001632	462.2381351	0.126360988	0.089492891	1.411966765	0.157959747	0.99718055
WBGene00001633	3.244309835	-0.045864072	0.110308216	-0.415781102	0.677570189	0.99718055
WBGene00001635	576.5100763	0.029911318	0.093531921	0.319797965	0.74912149	0.99718055
WBGene00001636	25.97797828	-0.058900529	0.156629998	-0.376048841	0.706880586	0.99718055
WBGene00001637	93.4067889	-0.369356194	0.156963061	-2.353140861	0.018615581	0.99718055
WBGene00001638	2328.743819	-0.175861063	0.129306918	-1.360028265	0.17382098	0.99718055
WBGene00001639	193.6945153	-0.016475536	0.115773811	-0.142307973	0.886836749	0.99718055
WBGene00001640	1.165719369	-0.04341795	0.060018201	-0.723413058	0.469426151	0.99718055
WBGene00001641	0.176157744	0.004261962	0.027179963	0.156805309	0.875398289	0.99718055
WBGene00001643	0.84861973	0.047047308	0.063257498	0.743742778	0.457032104	0.99718055
WBGene00001644	1.031768901	0.031057456	0.061053418	0.508693162	0.610967316	0.99718055
WBGene00001645	251.1656337	-0.094739685	0.106265535	-0.89153727	0.372641006	0.99718055
WBGene00001646	4.758186777	0.032995082	0.107509704	0.306903294	0.758916982	0.99718055
WBGene00001647	187.9098939	0.100577177	0.133811288	0.751634473	0.452270906	0.99718055
WBGene00001648	366.9412239	0.146495607	0.102466672	1.429690311	0.152805922	0.99718055
WBGene00001649	28.14560641	-0.044794756	0.156026415	-0.287097257	0.774037852	0.99718055
WBGene00001650	419.9297409	0.055985907	0.09530872	0.587416414	0.556924072	0.99718055
WBGene00001651	144.2382544	-0.053434318	0.132948683	-0.401916861	0.687745213	0.99718055
WBGene00001653	640.2162537	0.163250806	0.109700605	1.488148633	0.1367117	0.99718055
WBGene00001660	887.3501452	0.059473969	0.091852902	0.647491452	0.517313925	0.99718055
WBGene00001661	193.4677609	0.080015422	0.113896429	0.70252792	0.482349996	0.99718055
WBGene00001662	367.4987544	0.029143766	0.086498933	0.336926306	0.736172454	0.99718055
WBGene00001663	224.5391836	0.087141721	0.122966677	0.708661269	0.478534705	0.99718055
WBGene00001664	0.508468418	-0.02133225	0.036488052	-0.584636592	0.558792098	0.99718055
WBGene00001667	0.351641397	0.00971309	0.028066178	0.346078137	0.729283994	0.99718055
WBGene00001668	0.459393739	-0.034536193	0.042808312	-0.806763711	0.41980263	0.99718055
WBGene00001669	2.539773674	-0.047053196	0.100207435	-0.469557931	0.638670887	0.99718055
WBGene00001670	0.683137148	0.032458496	0.054361638	0.597084574	0.550450916	0.99718055
WBGene00001671	4316.567516	-0.187359834	0.123090755	-1.522127595	0.127977113	0.99718055
WBGene00001672	0.320267869	0.006683352	0.027179963	0.245892606	0.805765368	0.99718055
WBGene00001673	1.482714332	-0.031020282	0.070730945	-0.438567342	0.660975065	0.99718055
WBGene00001674	0.518364498	-0.035100524	0.048708189	-0.720628802	0.471137928	0.99718055
WBGene00001675	0.270419952	-0.000580793	0.027179963	-0.021368419	0.982951765	0.99718055
WBGene00001676	0.487084679	0.027128843	0.037997913	0.713956137	0.475254303	0.99718055
WBGene00001677	8.057366939	-0.105185501	0.133138232	-0.790047302	0.429500144	0.99718055
WBGene00001678	408.3142047	-0.029996116	0.093281231	-0.321566467	0.747781151	0.99718055
WBGene00001679	474.2003467	0.100246126	0.080012026	1.25288823	0.210246386	0.99718055
WBGene00001680	526.8171565	0.141452452	0.147010212	0.962194737	0.335951792	0.99718055
WBGene00001681	0.126462567	0.004261962	0.027179963	0.156805309	0.875398289	0.99718055
WBGene00001682	75.7723581	0.063042628	0.134646621	0.468208027	0.639635833	0.99718055
WBGene00001683	1018.486467	0.16184133	0.121030098	1.337199028	0.181157679	0.99718055
WBGene00001684	10.16620056	-0.116336941	0.150454184	-0.773238324	0.439381349	0.99718055
WBGene00001685	11.75031859	-0.065092574	0.130705084	-0.498011037	0.618476263	0.99718055
WBGene00001686	755.1696968	-0.127150345	0.121277827	-1.048422025	0.29444421	0.99718055
WBGene00001687	2.122413702	0.072686254	0.094956765	0.765466829	0.443993612	0.99718055
WBGene00001688	2534.118165	0.086930352	0.139328613	0.623923183	0.532678034	0.99718055
WBGene00001689	2408.10425	0.012400954	0.141400125	0.087701152	0.930114204	0.99718055
WBGene00001690	0.732062194	-0.020357907	0.0504422	-0.403588793	0.686515128	0.99718055
WBGene00001691	0.640856021	0.000882148	0.045369137	0.019443785	0.984487082	0.99718055
WBGene00001692	0.348694508	-0.000930127	0.034317698	-0.027103408	0.978377256	0.99718055
WBGene00001696	1.779597998	0.046341153	0.068762634	0.673929291	0.500356269	0.99718055
WBGene00001697	1.160273625	-0.017612407	0.065783572	-0.267732601	0.788905154	0.99718055
WBGene00001698	0.622388242	-0.006502769	0.054455076	-0.119415293	0.904946346	0.99718055
WBGene00001699	0.10822096	0.001840573	0.027179963	0.067718012	0.946010111	0.99718055
WBGene00001700	34.42444176	0.26559627	0.154551841	1.718493086	0.085706715	0.99718055
WBGene00001702	1.145490336	-0.097641413	0.067400644	-1.448671808	0.147429257	0.99718055
WBGene00001704	39.97333188	-0.044041627	0.153653027	-0.286630393	0.77439534	0.99718055
WBGene00001705	1.064348678	-0.05485658	0.067303255	-0.815065777	0.41503466	0.99718055
WBGene00001707	19.44691977	-0.024494446	0.152585088	-0.16052975	0.872463789	0.99718055
WBGene00001709	41.23317593	-0.258631279	0.156915638	-1.648218636	0.099307814	0.99718055
WBGene00001710	2.501115143	0.08788319	0.09345598	0.9403699	0.347027856	0.99718055
WBGene00001711	0.341494282	0.01790805	0.034059902	0.525781019	0.599040364	0.99718055
WBGene00001712	7.393031143	0.050524557	0.136657628	0.369716328	0.711593864	0.99718055
WBGene00001713	11.52171935	-0.370217893	0.148757412	-2.488735768	0.01281982	0.99718055
WBGene00001715	3.119282014	0.019348386	0.10520727	0.183907308	0.854086171	0.99718055
WBGene00001716	1.29647356	0.025864333	0.076370984	0.338667019	0.734860589	0.99718055
WBGene00001717	2.423893652	-0.07654126	0.094417326	-0.810669641	0.417555412	0.99718055
WBGene00001718	0.141719548	0.004261962	0.027179963	0.156805309	0.875398289	0.99718055
WBGene00001719	8.516743471	-0.02905657	0.139112825	-0.208870534	0.834549308	0.99718055
WBGene00001720	0.172810013	0.004261962	0.027179963	0.156805309	0.875398289	0.99718055
WBGene00001721	0.436732339	0.009081043	0.040949708	0.221760873	0.82450004	0.99718055
WBGene00001722	0.28617974	0.013295116	0.03278688	0.405501098	0.685109211	0.99718055
WBGene00001723	8.687959039	0.078585073	0.146939404	0.534812794	0.592779315	0.99718055
WBGene00001724	2.335551756	-0.015644737	0.095967684	-0.163020887	0.870501989	0.99718055
WBGene00001725	6.540916017	-0.110006759	0.136992581	-0.803012528	0.421967494	0.99718055
WBGene00001726	8.071262941	-0.174859225	0.134916131	-1.296058699	0.194955263	0.99718055
WBGene00001727	7.967532525	0.07119335	0.142556643	0.499403945	0.61749484	0.99718055
WBGene00001728	1.134859434	0.024430122	0.06189594	0.394696669	0.693066762	0.99718055
WBGene00001729	0.153463881	0.004261962	0.027179963	0.156805309	0.875398289	0.99718055
WBGene00001730	0.808791228	0.015332499	0.056959233	0.269183728	0.787788301	0.99718055
WBGene00001731	0.419469675	0.020041437	0.035473838	0.564963878	0.572098334	0.99718055
WBGene00001732	0.255791623	-0.012687716	0.027179963	-0.466804039	0.640640086	0.99718055
WBGene00001733	0.917242164	0.013616062	0.049368431	0.275805036	0.782697816	0.99718055
WBGene00001734	1.170952784	0.034154613	0.063667365	0.53645401	0.591644812	0.99718055
WBGene00001735	27.48438558	-0.073346893	0.156104168	-0.469858646	0.638456012	0.99718055
WBGene00001736	262.3191847	0.029519226	0.10684038	0.276292781	0.7823232	0.99718055
WBGene00001738	1.222573654	-0.097412874	0.0733836	-1.327447476	0.184360704	0.99718055
WBGene00001739	0.76748937	-0.017875501	0.061573878	-0.29030981	0.771579235	0.99718055
WBGene00001740	109.1498405	0.093091161	0.127626253	0.729404484	0.465754275	0.99718055
WBGene00001743	290.1311679	0.243541821	0.099273958	2.453229696	0.01415799	0.99718055
WBGene00001744	875.3396585	0.06049116	0.085806436	0.704972297	0.480827476	0.99718055
WBGene00001745	7244.162857	0.032991729	0.150935509	0.218581628	0.826975965	0.99718055
WBGene00001746	327.0920514	0.130013634	0.102517187	1.268213055	0.204721876	0.99718055
WBGene00001747	415.5473408	0.17475419	0.099849568	1.750174726	0.080088169	0.99718055
WBGene00001748	958.0818574	0.091276652	0.0799062	1.1422975	0.25333038	0.99718055
WBGene00001749	122.9670133	-0.107536884	0.129106328	-0.83293271	0.40488268	0.99718055
WBGene00001752	1.703886526	-0.055987882	0.084519656	-0.662424392	0.507699275	0.99718055
WBGene00001753	70.45168591	-0.097507546	0.153726739	-0.63429138	0.525890681	0.99718055
WBGene00001754	0.967744593	-0.084422762	0.056425867	-1.496171271	0.134609029	0.99718055
WBGene00001755	25.24902195	-0.022342523	0.156927587	-0.142374732	0.88678402	0.99718055
WBGene00001756	5.061149763	-0.088243074	0.117723242	-0.749580732	0.453507259	0.99718055
WBGene00001757	0.883293514	0.05274596	0.063211767	0.834432619	0.404037242	0.99718055
WBGene00001758	12.23035352	-0.077574222	0.149879462	-0.5175774	0.604753153	0.99718055
WBGene00001759	2.282120478	-0.031864312	0.093859895	-0.339488038	0.734242107	0.99718055
WBGene00001760	33.95433432	-0.083438688	0.155148312	-0.537799521	0.590715463	0.99718055
WBGene00001761	2.45318208	0.070634684	0.100992159	0.699407603	0.484297338	0.99718055
WBGene00001762	3.592076233	0.059458194	0.106029789	0.560768762	0.574955185	0.99718055
WBGene00001763	171.2572773	0.215848136	0.151006767	1.429393791	0.152891082	0.99718055
WBGene00001764	299.7117746	0.065952339	0.124050313	0.531657982	0.594962899	0.99718055
WBGene00001767	0.704190594	-0.021829924	0.055125746	-0.396002334	0.692103306	0.99718055
WBGene00001768	13.00724662	0.020980663	0.150869267	0.13906519	0.889398635	0.99718055
WBGene00001769	7.420036198	0.154217548	0.131550069	1.172310654	0.241072356	0.99718055
WBGene00001770	2.337810443	-0.018338903	0.095508826	-0.192012648	0.847732298	0.99718055
WBGene00001771	0.174430835	0.004261962	0.027179963	0.156805309	0.875398289	0.99718055
WBGene00001772	16.71001552	-0.091881026	0.148474572	-0.618833414	0.536026108	0.99718055
WBGene00001773	4.878938136	0.056600762	0.10172282	0.556421485	0.577922755	0.99718055
WBGene00001774	2.195867916	0.001839642	0.087481427	0.021028939	0.983222571	0.99718055
WBGene00001775	3.852393713	-0.112473819	0.106122326	-1.059850678	0.289212537	0.99718055
WBGene00001776	0.183766693	0.004261962	0.027179963	0.156805309	0.875398289	0.99718055
WBGene00001777	1.250984859	-0.009316022	0.071396089	-0.130483645	0.896183793	0.99718055
WBGene00001778	74.81692065	-0.074241392	0.156770777	-0.473566524	0.635809052	0.99718055
WBGene00001779	4.642993615	0.039616098	0.110015836	0.360094505	0.718776462	0.99718055
WBGene00001780	33.4035925	0.114208765	0.153842357	0.742375294	0.457859984	0.99718055
WBGene00001781	0.288202337	0.009104741	0.027179963	0.334979903	0.737640246	0.99718055
WBGene00001783	1.311435937	-0.068287228	0.073524932	-0.928762888	0.353011981	0.99718055
WBGene00001784	0.449606877	0.006604761	0.035782718	0.184579636	0.85355876	0.99718055
WBGene00001786	20.10382236	-0.199910585	0.14516906	-1.377088104	0.16848501	0.99718055
WBGene00001787	10.96607817	0.155632287	0.121498081	1.280944403	0.200213195	0.99718055
WBGene00001788	0.244223203	0.006683352	0.027179963	0.245892606	0.805765368	0.99718055
WBGene00001790	1.189050603	-0.07293762	0.065081444	-1.120712996	0.262410048	0.99718055
WBGene00001791	190.8042213	0.222607812	0.115680635	1.924330836	0.054313128	0.99718055
WBGene00001792	17.21003859	0.0073555	0.156770714	0.046918843	0.96257791	0.99718055
WBGene00001793	755.8327127	0.051606358	0.100559334	0.513193121	0.607816237	0.99718055
WBGene00001794	35.60974371	0.105208427	0.156749751	0.671187204	0.502101279	0.99718055
WBGene00001795	14.43364541	0.093680695	0.153777771	0.609195297	0.542394997	0.99718055
WBGene00001796	9.960141533	0.198259974	0.125525655	1.579437867	0.114235657	0.99718055
WBGene00001803	0.272369205	0.006683352	0.027179963	0.245892606	0.805765368	0.99718055
WBGene00001804	0.835255815	0.015145621	0.063584664	0.238196134	0.811728976	0.99718055
WBGene00001805	0.560242491	0.027321313	0.03753022	0.727981675	0.466624804	0.99718055
WBGene00001806	0.132715859	0.004261962	0.027179963	0.156805309	0.875398289	0.99718055
WBGene00001811	42.29412892	0.03781787	0.152258029	0.24838014	0.803840299	0.99718055
WBGene00001812	391.5663432	-0.036755525	0.083690011	-0.439186518	0.660526393	0.99718055
WBGene00001813	363.9690136	0.040693351	0.102812564	0.395801345	0.692251585	0.99718055
WBGene00001814	2902.985799	-0.239571373	0.107865656	-2.221016237	0.026349862	0.99718055
WBGene00001815	122.1687701	0.203217966	0.121106981	1.678003726	0.093346372	0.99718055
WBGene00001816	181.6020036	0.057432449	0.108495313	0.529354194	0.596559767	0.99718055
WBGene00001817	27.75648369	0.123306537	0.153654543	0.802491971	0.422268431	0.99718055
WBGene00001818	3.660792576	-0.011605272	0.107380071	-0.108076586	0.913934941	0.99718055
WBGene00001819	115.1481369	-0.126413061	0.1269061	-0.996114931	0.319194306	0.99718055
WBGene00001820	51.3275223	0.055628541	0.155928953	0.356755689	0.721274711	0.99718055
WBGene00001821	0.486890782	0.012125339	0.046629502	0.260035786	0.79483617	0.99718055
WBGene00001823	86.20958905	0.010511433	0.130191189	0.080738436	0.935649969	0.99718055
WBGene00001824	23.31668905	0.061399973	0.156946835	0.391215105	0.695638244	0.99718055
WBGene00001827	599.6125005	0.083089074	0.088259155	0.941421594	0.346488852	0.99718055
WBGene00001828	4.98733351	-0.120703342	0.121033849	-0.997269296	0.318633813	0.99718055
WBGene00001829	3898.036004	-0.005210451	0.146127212	-0.035656953	0.971555895	0.99718055
WBGene00001830	1635.086661	-0.005640628	0.142699372	-0.039528048	0.968469392	0.99718055
WBGene00001831	3350.995883	-0.003900754	0.142410331	-0.027390949	0.978147917	0.99718055
WBGene00001832	2913.821996	0.042543901	0.139620537	0.304710908	0.760586341	0.99718055
WBGene00001833	2363.12697	0.092960112	0.129937606	0.715421153	0.474348845	0.99718055
WBGene00001834	728.0711014	0.127042122	0.099257686	1.279922253	0.20057248	0.99718055
WBGene00001835	359.689091	0.06134744	0.114928233	0.533789114	0.593487446	0.99718055
WBGene00001836	1261.034437	-0.117283235	0.062064919	-1.889686421	0.058799911	0.99718055
WBGene00001837	141.2470627	-0.043670576	0.139772674	-0.312440012	0.754706146	0.99718055
WBGene00001838	187.3882468	-0.206025935	0.112521008	-1.83099973	0.067100583	0.99718055
WBGene00001839	2.83891575	-0.020250313	0.091034172	-0.222447382	0.82396563	0.99718055
WBGene00001840	1390.027424	0.013779778	0.124470354	0.110707309	0.91184845	0.99718055
WBGene00001841	0.302303002	-0.000584285	0.027260927	-0.021433045	0.982900214	0.99718055
WBGene00001842	12.85714878	0.131439343	0.151526933	0.867432211	0.385705239	0.99718055
WBGene00001843	28.50613826	-0.20806998	0.156897094	-1.326155729	0.18478812	0.99718055
WBGene00001844	88.74966853	-0.101126052	0.125881155	-0.803345442	0.4217751	0.99718055
WBGene00001851	60.47620049	0.288102705	0.14128363	2.03917966	0.0414321	0.99718055
WBGene00001852	12.92556963	0.171468576	0.150915844	1.136186703	0.255878434	0.99718055
WBGene00001853	272.2430643	-0.030182934	0.107662492	-0.280347721	0.779210742	0.99718055
WBGene00001854	4424.784924	-0.131292381	0.108737171	-1.207428696	0.22726709	0.99718055
WBGene00001855	1692.930793	0.043415594	0.112304742	0.386587358	0.699061719	0.99718055
WBGene00001856	525.1024757	0.024875536	0.12575525	0.197809122	0.843194409	0.99718055
WBGene00001857	13.18315717	-0.285781713	0.153684819	-1.859531179	0.062951884	0.99718055
WBGene00001858	0.892831566	-0.009426282	0.067544096	-0.139557455	0.889009657	0.99718055
WBGene00001859	18575.21296	-0.040985758	0.075687154	-0.541515379	0.5881524	0.99718055
WBGene00001860	1182.174957	0.066742183	0.127855079	0.522014329	0.601660354	0.99718055
WBGene00001862	592.203653	-0.080201749	0.094958799	-0.844595236	0.39833687	0.99718055
WBGene00001863	2.353553347	-0.082050713	0.098762896	-0.830784795	0.406095214	0.99718055
WBGene00001864	156.7208503	0.161761316	0.11557618	1.399607736	0.161630816	0.99718055
WBGene00001865	1242.796334	0.086913561	0.126074061	0.689384955	0.490581048	0.99718055
WBGene00001867	363.1068498	-0.019083603	0.095225493	-0.200404345	0.841164362	0.99718055
WBGene00001869	461.676188	0.092768736	0.145156342	0.639095298	0.522760939	0.99718055
WBGene00001872	410.3302447	0.081377082	0.086009487	0.946140763	0.344076795	0.99718055
WBGene00001874	785.0647749	0.013617149	0.135154444	0.100752505	0.91974693	0.99718055
WBGene00001875	111.802389	-0.202152973	0.134539284	-1.502557223	0.132953261	0.99718055
WBGene00001876	28.89542502	0.128327173	0.156862315	0.818087969	0.413306958	0.99718055
WBGene00001877	75.00264547	-0.106112361	0.14718999	-0.720921039	0.470958098	0.99718055
WBGene00001878	314.1964134	-0.060502121	0.099062019	-0.610749927	0.541365147	0.99718055
WBGene00001879	61.67248778	0.060905556	0.155909861	0.390645952	0.696058955	0.99718055
WBGene00001880	46.1164995	-0.071271797	0.15640707	-0.455681429	0.648619078	0.99718055
WBGene00001881	15.18256003	0.085446629	0.135819352	0.629119697	0.529270696	0.99718055
WBGene00001882	195.3916474	0.126227906	0.135433486	0.932028773	0.351321656	0.99718055
WBGene00001885	3.966417152	0.016707563	0.029010009	0.575924098	0.564666487	0.99718055
WBGene00001886	0.38979472	0.019012176	0.03500234	0.543168727	0.587013636	0.99718055
WBGene00001890	19.81558792	-0.134185455	0.133499322	-1.0051396	0.314829634	0.99718055
WBGene00001891	17.68241711	0.116800343	0.109525366	1.066422753	0.286232581	0.99718055
WBGene00001892	106.7043035	-0.203829782	0.148954005	-1.368407527	0.171184549	0.99718055
WBGene00001898	26584.99416	-0.217244974	0.09850713	-2.205373085	0.027427925	0.99718055
WBGene00001899	17.70428759	-0.036742294	0.116317291	-0.315879895	0.752093672	0.99718055
WBGene00001902	18.25920189	0.091480415	0.156016952	0.586349198	0.557640876	0.99718055
WBGene00001903	10.91767182	0.16603742	0.146096764	1.136489378	0.255751808	0.99718055
WBGene00001904	4.262397258	0.081378462	0.121140117	0.671771367	0.50172926	0.99718055
WBGene00001905	478.2936317	0.0143517	0.11894499	0.1206583	0.90396169	0.99718055
WBGene00001906	45.6061247	0.079641513	0.154756397	0.514625015	0.606815081	0.99718055
WBGene00001907	4.655303995	0.005231619	0.123435102	0.042383557	0.966192936	0.99718055
WBGene00001908	11.79353892	0.197095471	0.151559101	1.30045289	0.193445793	0.99718055
WBGene00001909	1337.965179	-0.14605223	0.117781775	-1.240024021	0.21496651	0.99718055
WBGene00001910	110.3744039	-0.067796337	0.13296233	-0.509891311	0.61012761	0.99718055
WBGene00001911	651.195464	0.050575993	0.126907956	0.398524998	0.690243235	0.99718055
WBGene00001912	262.7867709	-0.238631089	0.143746444	-1.66008343	0.09689767	0.99718055
WBGene00001914	26.29969656	-0.108955262	0.154683628	-0.70437488	0.481199346	0.99718055
WBGene00001915	89.11477277	-0.068926817	0.144901092	-0.475681833	0.634301065	0.99718055
WBGene00001916	76.69391182	-0.070217102	0.156962251	-0.447350252	0.654622189	0.99718055
WBGene00001917	1.196475763	-0.023149337	0.062129571	-0.372597722	0.709447868	0.99718055
WBGene00001919	53.15541801	-0.051715667	0.156626973	-0.330183659	0.741261193	0.99718055
WBGene00001920	50.51684885	-0.062700645	0.148128494	-0.423285509	0.672086966	0.99718055
WBGene00001921	26.00978491	0.061823847	0.156787892	0.394315185	0.693348354	0.99718055
WBGene00001922	147.3864634	-0.053089193	0.094391798	-0.562434389	0.573820094	0.99718055
WBGene00001924	17.31502889	-0.087930078	0.149732246	-0.587248774	0.55703664	0.99718055
WBGene00001929	55.31140826	-0.035085435	0.156941923	-0.223556806	0.823102177	0.99718055
WBGene00001930	53.48444348	0.188754596	0.145576731	1.296598675	0.194769309	0.99718055
WBGene00001931	8.805327931	-0.013530858	0.13995057	-0.096683121	0.922978044	0.99718055
WBGene00001932	16.17133566	0.009729256	0.152717788	0.063707419	0.949203197	0.99718055
WBGene00001933	178.4447308	-0.119068353	0.116462936	-1.022371213	0.30660524	0.99718055
WBGene00001934	596.4748286	-0.2126164	0.09535796	-2.229665983	0.025769626	0.99718055
WBGene00001935	154.551345	-0.057600778	0.101977984	-0.564835423	0.57218571	0.99718055
WBGene00001936	360.7920525	-0.117121918	0.107558951	-1.088909072	0.276193985	0.99718055
WBGene00001937	141.9905461	-0.142736709	0.15695119	-0.909433751	0.363121213	0.99718055
WBGene00001938	428.8833866	-0.09311995	0.11066125	-0.84148652	0.400075434	0.99718055
WBGene00001939	0.432883841	0.009104741	0.027179963	0.334979903	0.737640246	0.99718055
WBGene00001940	37.1567158	-0.172740696	0.156959109	-1.100545851	0.271094364	0.99718055
WBGene00001941	423.5085248	-0.323187028	0.114665435	-2.818521791	0.004824534	0.99718055
WBGene00001942	143.9402185	0.014151683	0.130616761	0.108345074	0.913721969	0.99718055
WBGene00001943	1.238743662	0.050046182	0.075285101	0.664755458	0.506206916	0.99718055
WBGene00001944	17.86614459	-0.167687805	0.139881427	-1.19878535	0.230611421	0.99718055
WBGene00001945	34.55296983	0.143818498	0.156352489	0.919835039	0.35765897	0.99718055
WBGene00001946	332.1925772	0.107257892	0.117803886	0.910478389	0.362570274	0.99718055
WBGene00001947	147.3595876	-0.1829828	0.11756966	-1.556377724	0.119618299	0.99718055
WBGene00001948	3.798765791	0.109494487	0.113917587	0.961172811	0.336465285	0.99718055
WBGene00001949	46.40534045	0.097486848	0.146925199	0.663513466	0.507001758	0.99718055
WBGene00001950	18.86208005	-0.144220674	0.154762484	-0.931883947	0.351396505	0.99718055
WBGene00001951	2.406766986	0.006670452	0.089544382	0.074493254	0.940617909	0.99718055
WBGene00001952	30.04354005	-0.0501093	0.15363454	-0.326159074	0.744304004	0.99718055
WBGene00001953	41.17905423	0.084341957	0.145891162	0.578115604	0.563186073	0.99718055
WBGene00001954	0.370149782	0.018355749	0.034548594	0.531302329	0.595209292	0.99718055
WBGene00001955	2220.91265	0.131983008	0.154124181	0.85634199	0.391808642	0.99718055
WBGene00001956	0.623653034	0.010472621	0.038036465	0.275331067	0.783061899	0.99718055
WBGene00001958	7.31600285	0.09090381	0.136863044	0.66419544	0.506565232	0.99718055
WBGene00001959	0.864682272	0.022480535	0.06181843	0.363654247	0.716116213	0.99718055
WBGene00001960	2.2813742	-0.042449154	0.084857532	-0.500240266	0.616905909	0.99718055
WBGene00001961	8.723635689	0.039086395	0.13789757	0.283445132	0.776835636	0.99718055
WBGene00001963	81.21716977	0.087421763	0.149635505	0.584231418	0.559064627	0.99718055
WBGene00001964	0.899776021	0.018102339	0.055019029	0.329019602	0.742140872	0.99718055
WBGene00001965	0.356267797	0.018125332	0.034598454	0.523876933	0.60036414	0.99718055
WBGene00001966	1.737150956	-0.08254172	0.085605417	-0.964211407	0.334939947	0.99718055
WBGene00001967	0.184819511	0.004261962	0.027179963	0.156805309	0.875398289	0.99718055
WBGene00001968	0.181905803	-0.015109106	0.027179963	-0.555891336	0.578285141	0.99718055
WBGene00001971	340.797299	0.130396736	0.115368984	1.130258166	0.258367457	0.99718055
WBGene00001972	437.7000011	0.004873348	0.117960177	0.041313504	0.967045968	0.99718055
WBGene00001973	811.6652476	0.037703785	0.119844121	0.314606881	0.753060154	0.99718055
WBGene00001974	1195.409867	0.010353258	0.115606284	0.089556186	0.928639903	0.99718055
WBGene00001975	83.60108265	-0.058764097	0.129317338	-0.454417777	0.64952816	0.99718055
WBGene00001976	19878.90617	-0.078216677	0.092397337	-0.846525231	0.397259805	0.99718055
WBGene00001977	2790.575449	-0.084892556	0.122007786	-0.69579622	0.486556457	0.99718055
WBGene00001978	631.731786	-0.020190437	0.070881573	-0.284847466	0.775761005	0.99718055
WBGene00001979	1089.16884	0.128012355	0.107621269	1.189470784	0.234254461	0.99718055
WBGene00001980	1169.093414	-0.093363282	0.076855274	-1.214793428	0.224444888	0.99718055
WBGene00001981	85.18916494	-0.092851408	0.14238126	-0.652132225	0.514315877	0.99718055
WBGene00001983	317.7500427	0.168620759	0.094579952	1.782838275	0.074612633	0.99718055
WBGene00001984	0.706722264	-0.058088571	0.05048275	-1.150661788	0.249871403	0.99718055
WBGene00001985	104.9084356	0.004147545	0.124483883	0.033317926	0.973421059	0.99718055
WBGene00001986	0.603810273	0.014648022	0.044155137	0.331739942	0.740085638	0.99718055
WBGene00001987	5.538904342	-0.102024827	0.131377473	-0.77657778	0.437407915	0.99718055
WBGene00001988	3.855906827	0.149164936	0.114200366	1.306168634	0.191495217	0.99718055
WBGene00001989	61.50408044	0.141172288	0.155726125	0.906542095	0.364648995	0.99718055
WBGene00001990	3.309500934	0.090886127	0.105264555	0.863406752	0.387913868	0.99718055
WBGene00001991	3.924884548	-0.021530813	0.105378898	-0.204318072	0.838104948	0.99718055
WBGene00001992	2.635360481	0.021179053	0.10164373	0.208365559	0.834943546	0.99718055
WBGene00001993	2.653885785	0.074503463	0.097298704	0.765718966	0.44384354	0.99718055
WBGene00001994	76.21145724	0.120202841	0.130061482	0.924200152	0.355382117	0.99718055
WBGene00001995	372.6010044	-0.113220407	0.101421652	-1.116333691	0.264279325	0.99718055
WBGene00001996	750.1198762	-0.179158792	0.117462228	-1.525245991	0.127197753	0.99718055
WBGene00001997	449.5551357	0.045061628	0.142459619	0.316311583	0.75176602	0.99718055
WBGene00001998	496.8148937	0.023182519	0.103773527	0.223395313	0.823227852	0.99718055
WBGene00001999	1324.518317	0.131127227	0.113867342	1.151578883	0.249494163	0.99718055
WBGene00002000	719.7230613	0.117434968	0.110941147	1.058533922	0.289812094	0.99718055
WBGene00002001	456.7310779	0.045384238	0.120676891	0.376080605	0.706856973	0.99718055
WBGene00002002	165.6682118	0.05620183	0.121281933	0.463398206	0.643078964	0.99718055
WBGene00002003	423.4174434	-0.143306365	0.085289474	-1.680235061	0.09291159	0.99718055
WBGene00002004	1839.97122	-0.164592778	0.077943172	-2.111702329	0.034711989	0.99718055
WBGene00002005	1005.274071	0.026099096	0.111362987	0.234360595	0.814705047	0.99718055
WBGene00002006	1078.514948	-0.006838164	0.073587234	-0.09292595	0.92596239	0.99718055
WBGene00002007	240.4608728	0.011811714	0.143549731	0.082283077	0.934421612	0.99718055
WBGene00002008	964.9912107	0.013956919	0.132759488	0.105129352	0.916273168	0.99718055
WBGene00002010	678.8394404	-0.038839286	0.118537303	-0.327654542	0.743172878	0.99718055
WBGene00002011	1.636372756	0.090561948	0.08451369	1.07156543	0.283915267	0.99718055
WBGene00002012	2.13914823	-0.03726595	0.090021981	-0.413965011	0.678899732	0.99718055
WBGene00002013	5.689892024	0.043264632	0.130330655	0.331960519	0.739919071	0.99718055
WBGene00002015	330.2578563	-0.129154953	0.142820428	-0.904317086	0.365827289	0.99718055
WBGene00002016	39.56782647	-0.198048578	0.154315982	-1.28339641	0.199353231	0.99718055
WBGene00002017	336.3439105	-0.119328027	0.141563477	-0.842929473	0.399267889	0.99718055
WBGene00002018	51.40386905	-0.148679487	0.151109593	-0.983918253	0.325155708	0.99718055
WBGene00002019	553.8254725	-0.217964298	0.156809316	-1.389995852	0.164530137	0.99718055
WBGene00002020	559.6665708	-0.216061172	0.156783326	-1.378087696	0.168176214	0.99718055
WBGene00002021	4.319436645	-0.019118519	0.109833466	-0.174068247	0.861811827	0.99718055
WBGene00002023	5.506251896	-0.121532682	0.126012962	-0.964445881	0.334822429	0.99718055
WBGene00002024	0.524534943	-0.016502906	0.047203396	-0.349612677	0.726629396	0.99718055
WBGene00002025	2029.441386	-0.022040959	0.122101855	-0.180512893	0.856749934	0.99718055
WBGene00002026	16.72670356	-0.425409953	0.14381711	-2.957992637	0.003096495	0.99718055
WBGene00002027	865.8224624	0.100223708	0.104785755	0.956463099	0.338838319	0.99718055
WBGene00002028	222.2101999	-0.048674651	0.1062147	-0.458266614	0.646760907	0.99718055
WBGene00002029	39.55071065	0.045965122	0.156729075	0.293277571	0.769309996	0.99718055
WBGene00002030	1.275671994	0.002466161	0.066251758	0.037224088	0.970306332	0.99718055
WBGene00002031	13.58452002	0.034517173	0.151219429	0.228258852	0.819445011	0.99718055
WBGene00002032	2862.068435	-0.015638772	0.062444892	-0.250441168	0.802246197	0.99718055
WBGene00002033	541.7155678	0.00634761	0.090091373	0.070457472	0.943829549	0.99718055
WBGene00002034	1463.090613	-0.012122826	0.103482924	-0.117148084	0.906742706	0.99718055
WBGene00002035	509.8882335	-0.012725216	0.082712021	-0.15384966	0.877728277	0.99718055
WBGene00002036	6639.84302	0.037244403	0.134584944	0.276735284	0.781983377	0.99718055
WBGene00002038	13.2121774	0.038730918	0.153196936	0.252817838	0.800408983	0.99718055
WBGene00002039	13.53477331	0.053187665	0.150985621	0.352269736	0.724635983	0.99718055
WBGene00002040	82.47567004	-0.239561525	0.13188348	-1.81646348	0.069299305	0.99718055
WBGene00002041	10.67601266	-0.01411741	0.148688068	-0.094946489	0.924357331	0.99718055
WBGene00002042	534.4885182	-0.09873393	0.07133871	-1.3840162	0.166353495	0.99718055
WBGene00002043	166.2874796	-0.008612073	0.102825581	-0.083754186	0.933251874	0.99718055
WBGene00002044	39.51811155	0.003762001	0.152557238	0.024659603	0.980326477	0.99718055
WBGene00002045	399.0609027	0.19130854	0.097644107	1.959243076	0.050084327	0.99718055
WBGene00002046	333.264486	0.003916731	0.090279793	0.043384362	0.965395143	0.99718055
WBGene00002047	4694.850306	-0.027996954	0.130074073	-0.215238545	0.829581341	0.99718055
WBGene00002048	231.0688721	-0.132778592	0.141570124	-0.937899808	0.348295902	0.99718055
WBGene00002050	0.715052152	-0.009471948	0.039110894	-0.242181844	0.808639263	0.99718055
WBGene00002051	0.523194774	0.034839087	0.043595964	0.799135594	0.424211793	0.99718055
WBGene00002052	1.39140363	-0.031912705	0.073384949	-0.434867166	0.663658848	0.99718055
WBGene00002053	0.77325587	0.005136527	0.052154739	0.098486296	0.921546154	0.99718055
WBGene00002054	4.599808071	-0.047947722	0.115991824	-0.413371564	0.679334405	0.99718055
WBGene00002055	14.71595163	-0.159505911	0.151360725	-1.053813074	0.291968506	0.99718055
WBGene00002056	35.17645729	0.028119703	0.155101525	0.18129869	0.856133134	0.99718055
WBGene00002057	3.125729397	0.112297244	0.102211996	1.098669913	0.271912071	0.99718055
WBGene00002058	122.4290712	0.057555416	0.12762806	0.450962082	0.652016878	0.99718055
WBGene00002059	252.3475037	0.009750042	0.092867903	0.104988292	0.916385099	0.99718055
WBGene00002060	15.81754064	0.016551411	0.155944253	0.106136715	0.915473881	0.99718055
WBGene00002061	427.6293413	-0.061005644	0.115342743	-0.528907521	0.596869604	0.99718055
WBGene00002062	17.23535534	0.274574519	0.155940582	1.760763723	0.078278402	0.99718055
WBGene00002063	2369.701001	-0.141876763	0.102086196	-1.389774213	0.164597451	0.99718055
WBGene00002064	738.6418865	-0.03388418	0.093435238	-0.362648834	0.716867226	0.99718055
WBGene00002065	3518.965543	-0.213930085	0.111779293	-1.913861499	0.055637855	0.99718055
WBGene00002066	1064.001379	0.120070384	0.124176703	0.966931651	0.333578203	0.99718055
WBGene00002067	21.87842092	-0.183738713	0.15694385	-1.170728975	0.241707735	0.99718055
WBGene00002068	217.5365676	0.071939418	0.10570511	0.680567076	0.496145466	0.99718055
WBGene00002069	50.08250677	-0.1954133	0.149181764	-1.309900718	0.190229424	0.99718055
WBGene00002070	187.1235899	0.153108684	0.110262628	1.388581855	0.164959938	0.99718055
WBGene00002071	119.5812449	-0.06062587	0.131021995	-0.462715208	0.643568516	0.99718055
WBGene00002072	385.0756067	0.200910055	0.083298676	2.411923734	0.0158686	0.99718055
WBGene00002073	566.8737898	0.098785509	0.078497885	1.258448029	0.208229771	0.99718055
WBGene00002074	1150.435159	0.108238791	0.096239648	1.124679832	0.260724731	0.99718055
WBGene00002075	773.0969262	0.11486483	0.101792982	1.128416004	0.259144272	0.99718055
WBGene00002076	1339.407526	0.067934976	0.071927748	0.944489121	0.344919759	0.99718055
WBGene00002077	1514.761362	-0.059930467	0.066900779	-0.895811211	0.370353601	0.99718055
WBGene00002078	1199.795053	0.143627871	0.065919645	2.178832603	0.029344106	0.99718055
WBGene00002079	921.9623191	-0.020907437	0.068930986	-0.303309706	0.76165385	0.99718055
WBGene00002080	909.618255	-0.118979273	0.075647057	-1.572820911	0.115760292	0.99718055
WBGene00002081	167.0783704	-0.146236373	0.143853879	-1.016561902	0.309361886	0.99718055
WBGene00002083	739.190622	0.212693454	0.093508861	2.274580744	0.022931092	0.99718055
WBGene00002084	0.394844221	-0.039141921	0.040541515	-0.965477513	0.334305694	0.99718055
WBGene00002088	2376.373311	0.041130639	0.095284997	0.431659129	0.665989177	0.99718055
WBGene00002090	0.208778423	0.006683352	0.027179963	0.245892606	0.805765368	0.99718055
WBGene00002091	0.165427147	0.004261962	0.027179963	0.156805309	0.875398289	0.99718055
WBGene00002092	0.164410984	-0.005423572	0.027179963	-0.199543013	0.841838	0.99718055
WBGene00002093	1.593993435	0.054052977	0.083727872	0.645579252	0.518551878	0.99718055
WBGene00002097	0.183495618	-0.005423572	0.027179963	-0.199543013	0.841838	0.99718055
WBGene00002098	1.739986987	0.044315173	0.076618248	0.578389276	0.563001333	0.99718055
WBGene00002099	0.174430835	0.004261962	0.027179963	0.156805309	0.875398289	0.99718055
WBGene00002100	2649.785091	0.052702806	0.15098884	0.349051006	0.727051018	0.99718055
WBGene00002101	0.146624335	0.004261962	0.027179963	0.156805309	0.875398289	0.99718055
WBGene00002102	0.265740628	0.006683352	0.027179963	0.245892606	0.805765368	0.99718055
WBGene00002103	0.338579081	0.0143385	0.034034124	0.42129776	0.673537666	0.99718055
WBGene00002106	0.290610812	0.013400441	0.032914953	0.407123206	0.6839175	0.99718055
WBGene00002107	0.362257587	-0.00063716	0.028457923	-0.022389541	0.982137223	0.99718055
WBGene00002110	1.53970394	-0.048446757	0.075728735	-0.639740739	0.522341165	0.99718055
WBGene00002111	0.199774734	0.006683352	0.027179963	0.245892606	0.805765368	0.99718055
WBGene00002114	6.800774641	0.023444862	0.138733908	0.168991577	0.865803267	0.99718055
WBGene00002115	0.812409382	-0.020920214	0.061271842	-0.341432759	0.732777817	0.99718055
WBGene00002116	2.050553764	-0.031307355	0.080056472	-0.391065879	0.695748541	0.99718055
WBGene00002117	184.9149305	0.291749047	0.144568202	2.018072044	0.043583759	0.99718055
WBGene00002118	0.724267277	0.008564039	0.051289322	0.166975079	0.867389658	0.99718055
WBGene00002119	5.530021388	-0.084966621	0.130745393	-0.649863208	0.515780585	0.99718055
WBGene00002120	1.85218157	-0.032641558	0.070466533	-0.463220714	0.64320617	0.99718055
WBGene00002121	0.10822096	0.001840573	0.027179963	0.067718012	0.946010111	0.99718055
WBGene00002123	1.761183859	-0.06053551	0.085144817	-0.710971168	0.477102103	0.99718055
WBGene00002124	22.70039091	0.020661874	0.154453898	0.133773732	0.8935815	0.99718055
WBGene00002125	15.80415749	-0.035598701	0.154441925	-0.230498946	0.817704082	0.99718055
WBGene00002127	0.947569783	0.031846923	0.069168954	0.460422216	0.645213192	0.99718055
WBGene00002128	1.057841294	-0.040253003	0.068033735	-0.591662404	0.554076677	0.99718055
WBGene00002129	23.84952177	0.03470817	0.156946381	0.221146672	0.824978231	0.99718055
WBGene00002130	2.06027919	-0.06535947	0.09355842	-0.69859527	0.484805001	0.99718055
WBGene00002131	0.621023566	-0.030994465	0.049684887	-0.623820793	0.532745282	0.99718055
WBGene00002132	10.30495171	-0.076030249	0.147347829	-0.51599165	0.605860241	0.99718055
WBGene00002133	48.05715769	-0.091099996	0.147262952	-0.61862128	0.53616588	0.99718055
WBGene00002134	25.26660475	-0.097685157	0.156457686	-0.624355121	0.532394392	0.99718055
WBGene00002135	88.41870934	-0.099925565	0.144237078	-0.692786948	0.488443264	0.99718055
WBGene00002136	328.9938539	-0.022625349	0.091491963	-0.2472933	0.804681243	0.99718055
WBGene00002137	5.421871096	0.012439005	0.125958114	0.098755087	0.92133273	0.99718055
WBGene00002138	2.056939675	-0.080535605	0.088505823	-0.909946967	0.362850479	0.99718055
WBGene00002139	7.104810135	-0.056889393	0.134368774	-0.423382544	0.672016179	0.99718055
WBGene00002140	1.079581183	-0.018307831	0.072259647	-0.253361759	0.799988675	0.99718055
WBGene00002141	9.62074851	0.062269593	0.143137522	0.435033328	0.663538236	0.99718055
WBGene00002142	58.37659382	0.042736571	0.156965106	0.272267974	0.785415979	0.99718055
WBGene00002143	167.7124581	-0.024658434	0.117119366	-0.210541047	0.833245419	0.99718055
WBGene00002144	452.7491096	0.100677749	0.084907942	1.185728296	0.235729616	0.99718055
WBGene00002146	1.624020545	0.002247475	0.065572312	0.034274757	0.972658054	0.99718055
WBGene00002147	628.5460081	-0.143000388	0.102764816	-1.391530622	0.16406458	0.99718055
WBGene00002148	823.6457496	0.210355838	0.078239497	2.688614389	0.007174925	0.99718055
WBGene00002149	0.843214563	0.033950938	0.051435266	0.66007121	0.509208133	0.99718055
WBGene00002150	2.00120344	0.018044527	0.079781721	0.226173698	0.821066327	0.99718055
WBGene00002151	295.1954412	0.155031988	0.128457669	1.206872192	0.227481368	0.99718055
WBGene00002152	1107.331048	-0.04563114	0.091702235	-0.497601174	0.618765176	0.99718055
WBGene00002153	340.8196454	-0.012783073	0.102824214	-0.124319676	0.901062169	0.99718055
WBGene00002162	165.0600935	0.035793167	0.108437076	0.330082368	0.741337725	0.99718055
WBGene00002163	22.37663961	0.052745212	0.15489597	0.340520237	0.733464786	0.99718055
WBGene00002169	1741.43414	0.052062692	0.075588186	0.688767583	0.490969538	0.99718055
WBGene00002173	49.3293496	0.062207376	0.152570518	0.40772868	0.683472879	0.99718055
WBGene00002174	24.20275927	-0.07653961	0.156925687	-0.487744307	0.625730964	0.99718055
WBGene00002175	83.74383927	-0.043959681	0.150716957	-0.291670436	0.770538616	0.99718055
WBGene00002176	1579.787761	0.055077075	0.130964056	0.42055108	0.674082923	0.99718055
WBGene00002177	0.559931873	-0.009032131	0.052197862	-0.173036414	0.862622805	0.99718055
WBGene00002178	1.05721331	-0.060391016	0.063039834	-0.957981828	0.338071922	0.99718055
WBGene00002179	6.178662352	-0.066537525	0.122247989	-0.544283183	0.586246617	0.99718055
WBGene00002180	63.3431145	0.077214059	0.144004073	0.536193578	0.591824771	0.99718055
WBGene00002181	975.1020253	-0.155794475	0.143023806	-1.089290514	0.276025794	0.99718055
WBGene00002182	89.29712281	-0.123279966	0.137042002	-0.899577971	0.368344885	0.99718055
WBGene00002183	292.7349053	-0.042820508	0.101953773	-0.419999251	0.674486001	0.99718055
WBGene00002184	3930.101464	-0.016812019	0.138975478	-0.120971117	0.903713912	0.99718055
WBGene00002185	554.9165304	-0.051423382	0.08401284	-0.612089559	0.540478505	0.99718055
WBGene00002186	4.326481562	-0.033749411	0.074856319	-0.450855876	0.652093427	0.99718055
WBGene00002187	16.04736337	-0.010547314	0.155613533	-0.067778901	0.945961639	0.99718055
WBGene00002188	1.033831813	0.051874479	0.060261145	0.860827974	0.389332796	0.99718055
WBGene00002189	189.131622	-0.098682111	0.14128017	-0.698485224	0.484873795	0.99718055
WBGene00002190	13.22312878	-0.209279272	0.153123667	-1.366733672	0.171708799	0.99718055
WBGene00002191	256.8972175	-0.012384381	0.119275965	-0.103829647	0.917304539	0.99718055
WBGene00002192	1182.766655	0.01711539	0.081060593	0.211143161	0.832775562	0.99718055
WBGene00002193	1.772008052	-0.145081041	0.073342732	-1.978124301	0.047914686	0.99718055
WBGene00002194	0.14615062	0.004261962	0.027179963	0.156805309	0.875398289	0.99718055
WBGene00002195	1.692097662	-0.032839455	0.085526986	-0.383966002	0.701003646	0.99718055
WBGene00002196	198.1446873	0.124230896	0.146660973	0.847061721	0.39696072	0.99718055
WBGene00002199	0.359018193	0.02511384	0.040231958	0.624226135	0.532479085	0.99718055
WBGene00002200	0.24077568	-0.012687716	0.027179963	-0.466804039	0.640640086	0.99718055
WBGene00002201	901.1178576	0.084684616	0.108604692	0.779750984	0.435537463	0.99718055
WBGene00002202	777.4824874	0.095681026	0.083743737	1.142545461	0.253227361	0.99718055
WBGene00002203	120.0972704	-0.210103147	0.132727054	-1.582971526	0.113427954	0.99718055
WBGene00002204	1.843727268	-0.05943109	0.080819952	-0.735351706	0.462125326	0.99718055
WBGene00002206	6.08536702	-0.082162312	0.115734893	-0.70991824	0.477754838	0.99718055
WBGene00002207	59.65387079	-0.046682305	0.144061385	-0.324044541	0.745904313	0.99718055
WBGene00002208	19.32780767	-0.291185183	0.11409709	-2.552082467	0.010708117	0.99718055
WBGene00002210	21.40433619	-0.093474175	0.15586713	-0.599704215	0.548703379	0.99718055
WBGene00002211	1.97921779	-0.013893951	0.093121487	-0.149202414	0.881393915	0.99718055
WBGene00002212	10.39766336	0.055369907	0.14965043	0.369994975	0.711386235	0.99718055
WBGene00002213	7.078215091	0.0293648	0.137535682	0.213506775	0.830931705	0.99718055
WBGene00002214	1262.117498	0.064000136	0.120892982	0.52939497	0.596531487	0.99718055
WBGene00002215	40.30950969	-0.043018496	0.152371047	-0.282327234	0.777692605	0.99718055
WBGene00002216	21.9219178	-0.372017488	0.156869309	-2.371512253	0.017715459	0.99718055
WBGene00002217	21.39091427	0.047421254	0.155484779	0.304989686	0.760374008	0.99718055
WBGene00002218	73.17762386	0.057447461	0.150506581	0.381694012	0.702688342	0.99718055
WBGene00002219	9184.672129	-0.025688583	0.127576359	-0.201358492	0.840418269	0.99718055
WBGene00002220	1107.690789	-0.163067847	0.153854592	-1.059882873	0.289197888	0.99718055
WBGene00002221	4021.256612	-0.021974967	0.130023487	-0.169007673	0.865790606	0.99718055
WBGene00002222	5503.122765	0.068285842	0.100265181	0.681052403	0.495838333	0.99718055
WBGene00002223	1739.164901	-0.017349116	0.102951308	-0.168517688	0.86617603	0.99718055
WBGene00002224	0.893070489	-0.029058475	0.05504404	-0.527913199	0.597559583	0.99718055
WBGene00002225	5869.653733	0.046951704	0.098403214	0.477135878	0.633265368	0.99718055
WBGene00002226	6997.37359	0.031141654	0.116446229	0.267433769	0.789135202	0.99718055
WBGene00002227	4.917960301	-0.172990833	0.110426509	-1.566569789	0.117215284	0.99718055
WBGene00002228	5649.808487	-0.007256424	0.125008906	-0.058047256	0.953710987	0.99718055
WBGene00002229	5067.895784	0.044914596	0.138903264	0.323351621	0.746428964	0.99718055
WBGene00002230	1220.853212	-0.261938433	0.111996036	-2.338818778	0.019344814	0.99718055
WBGene00002231	2394.021498	0.073552425	0.125868218	0.584360579	0.558977743	0.99718055
WBGene00002232	31.04410445	0.141170423	0.155887719	0.905590404	0.36515269	0.99718055
WBGene00002233	59.95252483	0.112248301	0.156509773	0.717196748	0.473252706	0.99718055
WBGene00002234	3.367686979	0.148987204	0.110131268	1.352814761	0.176114816	0.99718055
WBGene00002235	14.05889369	-0.069745499	0.155634252	-0.448137206	0.654054178	0.99718055
WBGene00002238	366.8925237	0.019358922	0.092846159	0.208505361	0.834834397	0.99718055
WBGene00002239	19.42215135	-0.098392318	0.154816778	-0.635540407	0.525076022	0.99718055
WBGene00002240	742.0623394	0.048879505	0.092602301	0.527843315	0.597608091	0.99718055
WBGene00002241	346.7865124	0.01986353	0.098790892	0.201066412	0.840646645	0.99718055
WBGene00002242	0.127811073	0.004261962	0.027179963	0.156805309	0.875398289	0.99718055
WBGene00002243	15.96153864	-0.217395391	0.156025532	-1.393332158	0.163519371	0.99718055
WBGene00002244	453.8571969	0.187167792	0.096761474	1.934321429	0.05307362	0.99718055
WBGene00002245	817.0587878	0.093278792	0.095248831	0.979316924	0.327423411	0.99718055
WBGene00002246	856.9044374	0.092209792	0.151880555	0.607120461	0.543770972	0.99718055
WBGene00002247	31.0352081	-0.128376319	0.15666821	-0.819415238	0.412549544	0.99718055
WBGene00002248	1302.727811	0.028315137	0.099296261	0.285158141	0.775522988	0.99718055
WBGene00002249	124.4666748	-0.179967278	0.126306772	-1.424842672	0.154202684	0.99718055
WBGene00002250	360.4978659	0.170150116	0.097685548	1.741814616	0.081540888	0.99718055
WBGene00002251	566.8302118	0.164233116	0.083860489	1.958408762	0.050182067	0.99718055
WBGene00002252	1.314259278	-0.005589708	0.070596759	-0.07917797	0.936891067	0.99718055
WBGene00002253	357.2717365	0.230895357	0.142861614	1.616216913	0.106047423	0.99718055
WBGene00002254	0.562302514	0.022004402	0.049479461	0.444717896	0.656523635	0.99718055
WBGene00002255	5.220495901	0.071069285	0.120815402	0.588246895	0.556366585	0.99718055
WBGene00002256	121.2330432	0.178296902	0.124671633	1.430132082	0.152679114	0.99718055
WBGene00002257	2.896409059	0.056752242	0.091688351	0.618968953	0.535936812	0.99718055
WBGene00002258	1.191900947	0.01210712	0.064454918	0.187838571	0.851003198	0.99718055
WBGene00002260	2.358836975	-0.064471666	0.098381748	-0.655321407	0.512260841	0.99718055
WBGene00002261	57.5887569	-0.060765159	0.153762824	-0.395187586	0.692704453	0.99718055
WBGene00002262	52.13332436	-0.024864491	0.15229893	-0.1632611	0.870312861	0.99718055
WBGene00002263	831.8272209	-0.069677036	0.138424435	-0.503357919	0.614712652	0.99718055
WBGene00002264	294.6815802	-0.156368365	0.135559069	-1.153507218	0.248702257	0.99718055
WBGene00002265	3.425110844	0.078687676	0.098619379	0.797892636	0.424932797	0.99718055
WBGene00002266	1.099633581	-0.09707861	0.067185822	-1.444927029	0.148478383	0.99718055
WBGene00002267	2.737195008	-0.128639143	0.10415093	-1.235122363	0.216784968	0.99718055
WBGene00002268	0.33258175	-0.008631684	0.027479333	-0.314115499	0.753433318	0.99718055
WBGene00002269	2.934642918	0.010960942	0.097654275	0.112242317	0.910631277	0.99718055
WBGene00002270	0.257078861	0.006683352	0.027179963	0.245892606	0.805765368	0.99718055
WBGene00002271	3.806061501	0.003857042	0.11016909	0.035010197	0.97207161	0.99718055
WBGene00002272	5.637457825	-0.094998359	0.127380592	-0.745783614	0.45579814	0.99718055
WBGene00002273	3.925743124	0.127600872	0.111874914	1.140567329	0.254050019	0.99718055
WBGene00002275	561.8742322	0.099396658	0.094303722	1.054005675	0.291880319	0.99718055
WBGene00002276	1721.846524	0.048964471	0.068707244	0.712653681	0.476060085	0.99718055
WBGene00002278	325.0696602	0.068187846	0.136032035	0.501263145	0.61618594	0.99718055
WBGene00002280	3.87268931	-0.061937064	0.11024803	-0.56179747	0.574254016	0.99718055
WBGene00002282	10.98350379	0.061708778	0.143818003	0.429075472	0.667868302	0.99718055
WBGene00002295	106.5107608	0.093503207	0.124719272	0.749709373	0.453429761	0.99718055
WBGene00002297	943.0255776	0.091031787	0.130194086	0.699200629	0.484426657	0.99718055
WBGene00002299	9.568750117	0.003261266	0.146230043	0.022302299	0.982206815	0.99718055
WBGene00002324	269.806813	-0.101217306	0.118164333	-0.856580865	0.391676565	0.99718055
WBGene00002335	549.7694229	0.113338482	0.097696455	1.160108441	0.246004658	0.99718055
WBGene00002344	395.5821939	0.1361923	0.106699107	1.276414629	0.201808987	0.99718055
WBGene00002348	1.652461388	-0.16487484	0.086657605	-1.90260093	0.057092638	0.99718055
WBGene00002363	649.7278089	0.101347084	0.128019776	0.791651787	0.428563742	0.99718055
WBGene00002368	2188.280653	0.011577734	0.119218643	0.097113452	0.922636298	0.99718055
WBGene00002393	8.981822395	-0.052809357	0.143682411	-0.367542255	0.713214579	0.99718055
WBGene00002497	5.517323639	-0.048852696	0.133432468	-0.366123006	0.714273291	0.99718055
WBGene00002583	992.7871987	0.075474468	0.08347148	0.904194686	0.365892178	0.99718055
WBGene00002601	3.32800339	-0.00738748	0.10748774	-0.068728581	0.945205668	0.99718055
WBGene00002632	128.4630729	-0.021145129	0.126364968	-0.167333787	0.867107421	0.99718055
WBGene00002637	2004.362607	0.066023181	0.113186089	0.583315335	0.559681041	0.99718055
WBGene00002694	1696.705568	0.069260496	0.085876818	0.806509802	0.419948958	0.99718055
WBGene00002696	619.3763689	-0.122797396	0.08744175	-1.404333695	0.160219505	0.99718055
WBGene00002717	959.8885824	0.082536568	0.075882362	1.087691069	0.276731512	0.99718055
WBGene00002783	202.9011086	0.096836364	0.123492274	0.784149163	0.432952591	0.99718055
WBGene00002804	551.161349	0.023798872	0.103361014	0.230249986	0.817897522	0.99718055
WBGene00002827	0.794748222	0.008019696	0.058334866	0.137476896	0.890653854	0.99718055
WBGene00002845	1285.805514	0.121041746	0.090718212	1.334260711	0.182118429	0.99718055
WBGene00002850	1540.332012	0.184607752	0.129569393	1.42477901	0.154221091	0.99718055
WBGene00002855	274.8511482	-0.01863065	0.096648716	-0.192766663	0.847141713	0.99718055
WBGene00002879	779.6752399	0.063977558	0.078428087	0.815748032	0.414644261	0.99718055
WBGene00002881	33.35001598	0.060260121	0.15667065	0.384629289	0.700512091	0.99718055
WBGene00002889	1255.617174	0.013964087	0.084687715	0.16488917	0.869031217	0.99718055
WBGene00002891	124.7435114	0.019623594	0.113591049	0.172756518	0.862842817	0.99718055
WBGene00002915	154.0567934	-0.082862859	0.139241534	-0.595101592	0.551775565	0.99718055
WBGene00002957	958.7009604	0.070068758	0.120862654	0.579738702	0.56209084	0.99718055
WBGene00002974	2.371840427	-0.039344257	0.098192003	-0.400686983	0.688650595	0.99718055
WBGene00002975	0.97303825	-0.006897211	0.061296589	-0.112521933	0.91040958	0.99718055
WBGene00002976	1.518288374	-0.027136072	0.082156754	-0.330296299	0.741176089	0.99718055
WBGene00002977	3088.286028	-0.066957264	0.093348058	-0.717286097	0.473197584	0.99718055
WBGene00002978	285.1978307	0.183736318	0.156320633	1.175381098	0.239842282	0.99718055
WBGene00002979	40.82551329	-0.088674744	0.151906589	-0.58374521	0.559391745	0.99718055
WBGene00002980	641.1430699	0.06440917	0.114030828	0.56483997	0.572182618	0.99718055
WBGene00002981	315.1117342	0.17652474	0.104888867	1.682969278	0.092381039	0.99718055
WBGene00002982	56.88513162	-0.086907606	0.151555913	-0.573435933	0.566349566	0.99718055
WBGene00002983	77.93404113	0.258857284	0.15052028	1.719750216	0.085477856	0.99718055
WBGene00002985	571.1495335	0.093252648	0.135908326	0.686143747	0.492622466	0.99718055
WBGene00002986	395.5134644	-0.022135682	0.078954525	-0.28035989	0.779201407	0.99718055
WBGene00002987	0.42941352	-0.017939546	0.041238762	-0.435016589	0.663550386	0.99718055
WBGene00002988	0.141719548	0.004261962	0.027179963	0.156805309	0.875398289	0.99718055
WBGene00002989	38.38064402	-0.154878999	0.154891632	-0.99991844	0.31734998	0.99718055
WBGene00002990	3245.175758	-0.111763042	0.129488732	-0.863110177	0.388076893	0.99718055
WBGene00002991	89.53546967	0.099586056	0.141616901	0.703207421	0.481926495	0.99718055
WBGene00002992	234.7577538	-0.029035639	0.115627343	-0.251113955	0.801726007	0.99718055
WBGene00002993	0.455600143	-0.01837535	0.041783195	-0.439778476	0.660097558	0.99718055
WBGene00002994	3454.738746	0.025730294	0.125872028	0.204416297	0.838028196	0.99718055
WBGene00002996	185.3117171	0.027665499	0.116211462	0.238061707	0.811833234	0.99718055
WBGene00002997	71.78693234	0.040780227	0.14524819	0.280762374	0.778892664	0.99718055
WBGene00002998	1059.408688	0.117701531	0.130551342	0.901572737	0.367283879	0.99718055
WBGene00002999	60.27377413	0.114654335	0.14386013	0.796984789	0.425459865	0.99718055
WBGene00003000	0.537004849	0.01415965	0.042534641	0.332896883	0.739212122	0.99718055
WBGene00003001	31.08387816	-0.333121309	0.156879806	-2.123417397	0.033718891	0.99718055
WBGene00003002	3276.064938	-0.023305078	0.081223037	-0.286926949	0.774168255	0.99718055
WBGene00003003	4.33060847	-0.123816348	0.119424683	-1.036773517	0.29984142	0.99718055
WBGene00003006	10.88343133	-0.074145923	0.141635931	-0.523496562	0.600628743	0.99718055
WBGene00003007	6.071666798	0.105655176	0.111240485	0.94979068	0.342218623	0.99718055
WBGene00003008	3.439874004	0.010023144	0.114822512	0.087292497	0.930439018	0.99718055
WBGene00003009	462.4040191	0.114718409	0.11134276	1.030317633	0.302860924	0.99718055
WBGene00003010	194.9283002	0.069316998	0.115462857	0.600340232	0.548279511	0.99718055
WBGene00003011	114.7026315	-0.095512046	0.134402673	-0.71064097	0.477306748	0.99718055
WBGene00003012	195.4361917	0.056934473	0.102523688	0.555329937	0.578669005	0.99718055
WBGene00003014	23.00495758	0.068699102	0.156751662	0.438267136	0.661192646	0.99718055
WBGene00003015	6.793600867	0.034561939	0.137281525	0.251759581	0.801226901	0.99718055
WBGene00003017	249.233931	0.050847749	0.136779939	0.371748582	0.71008005	0.99718055
WBGene00003018	1.262758235	0.008548089	0.066066371	0.129386381	0.897051923	0.99718055
WBGene00003019	2.739237778	-0.031557553	0.079174053	-0.398584535	0.690199358	0.99718055
WBGene00003020	1081.475492	0.072027874	0.085690131	0.840562075	0.400593312	0.99718055
WBGene00003021	2724.946987	-0.107887451	0.095936976	-1.124565895	0.260773033	0.99718055
WBGene00003024	3.125935962	0.03800897	0.105715785	0.359539212	0.71919175	0.99718055
WBGene00003025	2449.928722	-0.084768941	0.068821198	-1.231727196	0.218051007	0.99718055
WBGene00003026	648.1690357	0.102326528	0.111617407	0.916761377	0.359267696	0.99718055
WBGene00003029	1.324441364	-0.032000942	0.059459916	-0.538193527	0.590443448	0.99718055
WBGene00003030	1004.676725	0.002090816	0.087503295	0.023894142	0.980937047	0.99718055
WBGene00003031	7.784395479	0.112388001	0.134124315	0.837939048	0.402064937	0.99718055
WBGene00003033	4.818526992	0.077395215	0.109792059	0.704925442	0.480856636	0.99718055
WBGene00003034	1232.697654	0.099385753	0.128195358	0.775267951	0.438181343	0.99718055
WBGene00003035	127.5674187	0.051498766	0.130223524	0.395464386	0.6925002	0.99718055
WBGene00003037	876.8416541	-0.066919427	0.094997081	-0.704436667	0.481160878	0.99718055
WBGene00003038	604.6790359	-0.188693549	0.079861057	-2.362773006	0.018138776	0.99718055
WBGene00003040	412.6669572	0.021281586	0.086421318	0.246253891	0.8054857	0.99718055
WBGene00003041	696.3745808	0.076114133	0.120623384	0.631006449	0.528036308	0.99718055
WBGene00003043	229.0966137	-0.106898052	0.107311619	-0.996146112	0.319179158	0.99718055
WBGene00003044	471.0851903	-0.141251755	0.091410215	-1.545251311	0.122285488	0.99718055
WBGene00003046	4.611509516	-0.024617866	0.117284286	-0.209899099	0.833746426	0.99718055
WBGene00003048	352.2927573	0.150352559	0.107319669	1.400978587	0.161220477	0.99718055
WBGene00003052	1593.31376	0.078707101	0.124584539	0.631756568	0.527545958	0.99718055
WBGene00003053	37.44129533	0.147444859	0.156716174	0.94084009	0.346786813	0.99718055
WBGene00003055	1.266489927	0.013510404	0.068870179	0.196172045	0.844475508	0.99718055
WBGene00003056	6.425477284	0.017706404	0.133005477	0.133125378	0.894094225	0.99718055
WBGene00003057	4.51308449	0.012984996	0.116664082	0.111302428	0.91137653	0.99718055
WBGene00003058	1.785606924	0.002198857	0.073653024	0.02985426	0.976183285	0.99718055
WBGene00003059	349.4351972	0.056948705	0.107307874	0.530703875	0.595624	0.99718055
WBGene00003060	1477.320952	0.024801291	0.076278496	0.325141326	0.745074113	0.99718055
WBGene00003061	169.4391882	-0.165743071	0.113631796	-1.458597652	0.14467588	0.99718055
WBGene00003062	551.0441036	-0.012634656	0.12486489	-0.101186621	0.919402317	0.99718055
WBGene00003063	840.5458713	0.03341988	0.097216098	0.343768996	0.731020018	0.99718055
WBGene00003064	204.4887319	0.122644526	0.113374196	1.081767551	0.279355829	0.99718055
WBGene00003065	81.95748964	-0.037457269	0.139977655	-0.267594633	0.789011363	0.99718055
WBGene00003066	218.4260763	0.134470863	0.11591585	1.160073124	0.246019035	0.99718055
WBGene00003067	9896.666055	-0.120617315	0.09295867	-1.297537016	0.194446477	0.99718055
WBGene00003068	59.61488425	-0.086246974	0.141263384	-0.610540196	0.541504025	0.99718055
WBGene00003071	9.04318576	0.085348544	0.147090492	0.580245143	0.561749315	0.99718055
WBGene00003072	89.09378152	0.030432401	0.138937962	0.219035892	0.826622089	0.99718055
WBGene00003073	397.2837418	0.040186493	0.133797816	0.300352387	0.763908377	0.99718055
WBGene00003074	182.3420899	-0.015630953	0.121535272	-0.12861248	0.897664291	0.99718055
WBGene00003075	933.9697371	0.008226022	0.133957601	0.061407651	0.951034559	0.99718055
WBGene00003076	420.5188475	-0.047392343	0.084158416	-0.563132546	0.573344631	0.99718055
WBGene00003077	83.5785246	0.077565679	0.129065393	0.600979681	0.54785352	0.99718055
WBGene00003078	129.2065458	-0.114541086	0.116100161	-0.986571292	0.32385285	0.99718055
WBGene00003079	66.86041244	-0.023123313	0.149931745	-0.154225601	0.877431857	0.99718055
WBGene00003080	103.1047766	-0.030973629	0.135582756	-0.228448145	0.819297864	0.99718055
WBGene00003081	44.2419941	0.01401151	0.147419631	0.095045075	0.924279024	0.99718055
WBGene00003082	135.0655095	-0.035193252	0.115660961	-0.304279433	0.760915013	0.99718055
WBGene00003083	158.1776834	0.16811425	0.116452924	1.443624118	0.148844737	0.99718055
WBGene00003084	38.30892472	0.152199199	0.155464621	0.978995724	0.327582092	0.99718055
WBGene00003085	1864.782353	0.079615881	0.143355085	0.555375356	0.578637945	0.99718055
WBGene00003086	429.1797306	0.052382106	0.087143805	0.601099592	0.547773655	0.99718055
WBGene00003087	129.7740694	-0.096300176	0.153328241	-0.628065484	0.529961043	0.99718055
WBGene00003089	88.68287889	-0.151416205	0.153328461	-0.987528372	0.323383681	0.99718055
WBGene00003090	10.32748735	-0.029060058	0.132541221	-0.219252981	0.826452987	0.99718055
WBGene00003091	7.144081845	0.120650155	0.138658444	0.870124828	0.384232191	0.99718055
WBGene00003092	0.864138506	0.009747109	0.053758534	0.181312784	0.856122072	0.99718055
WBGene00003093	14.27553157	0.033910681	0.155167945	0.218541796	0.827006996	0.99718055
WBGene00003094	5.154759459	-0.126518412	0.120447568	-1.050402379	0.293533152	0.99718055
WBGene00003095	1.506912889	0.019490789	0.076234071	0.255670314	0.798205419	0.99718055
WBGene00003096	0.328025415	-0.000597041	0.027554611	-0.021667537	0.98271316	0.99718055
WBGene00003097	2.738041531	0.013266796	0.099716481	0.133045166	0.894157661	0.99718055
WBGene00003098	7.19967599	0.030103241	0.123325844	0.244095152	0.807157127	0.99718055
WBGene00003099	1.513553147	0.014309783	0.083342829	0.171697828	0.863675094	0.99718055
WBGene00003100	16.3589343	-0.131671368	0.151445887	-0.869428488	0.384612807	0.99718055
WBGene00003102	90.07312604	0.087579567	0.156949267	0.558011955	0.57683622	0.99718055
WBGene00003104	3.303237852	0.065097157	0.096264386	0.676233031	0.498892704	0.99718055
WBGene00003106	0.275845613	0.006683352	0.027179963	0.245892606	0.805765368	0.99718055
WBGene00003107	26.84805398	-0.020818206	0.156900977	-0.132683724	0.894443515	0.99718055
WBGene00003111	38.16800542	0.189318607	0.155180505	1.219989636	0.222468804	0.99718055
WBGene00003123	591.3693482	-0.066555444	0.109657491	-0.606939327	0.543891178	0.99718055
WBGene00003124	1064.24591	0.11081732	0.155233552	0.71387479	0.475304607	0.99718055
WBGene00003129	271.2930315	-0.080576847	0.112011196	-0.719364226	0.471916533	0.99718055
WBGene00003130	435.9426839	-0.010620614	0.131379902	-0.080838959	0.935570025	0.99718055
WBGene00003132	862.9214869	0.079805341	0.131024252	0.609088314	0.542465903	0.99718055
WBGene00003133	2014.485812	-0.005312148	0.124826494	-0.042556255	0.966055268	0.99718055
WBGene00003134	544.053266	0.047369072	0.120822654	0.392054556	0.695017904	0.99718055
WBGene00003136	276.8920691	0.052242119	0.105006267	0.497514297	0.618826423	0.99718055
WBGene00003142	370.2634207	-0.12117673	0.083801991	-1.445988674	0.148180379	0.99718055
WBGene00003143	25.06540291	0.215439473	0.156043485	1.380637406	0.167390476	0.99718055
WBGene00003144	572.3549416	0.072698025	0.120503696	0.603284607	0.546319371	0.99718055
WBGene00003148	459.1026737	-0.043591986	0.093014371	-0.46865861	0.639313677	0.99718055
WBGene00003149	94.38086543	0.198940686	0.138977959	1.431454943	0.152299871	0.99718055
WBGene00003150	464.280164	0.094909054	0.079211101	1.198178696	0.230847457	0.99718055
WBGene00003151	21.74038153	-0.024316913	0.156929462	-0.154954417	0.876857253	0.99718055
WBGene00003153	1915.531748	0.064654965	0.126184689	0.512383597	0.608382569	0.99718055
WBGene00003154	2578.449993	-0.103470476	0.104515491	-0.99000134	0.322173464	0.99718055
WBGene00003155	1124.165815	0.049826714	0.11267955	0.442198371	0.658345665	0.99718055
WBGene00003156	1128.04313	0.039333048	0.069114029	0.569103677	0.569285783	0.99718055
WBGene00003157	666.2432279	0.12066419	0.116804835	1.033041059	0.301584684	0.99718055
WBGene00003158	1031.605115	0.071835226	0.122214147	0.587781589	0.556678903	0.99718055
WBGene00003159	1920.210537	0.081240552	0.125300923	0.648363554	0.516749837	0.99718055
WBGene00003160	1647.786765	0.078705137	0.138202836	0.569490031	0.569023634	0.99718055
WBGene00003161	150.1428208	0.083511757	0.121468062	0.68752029	0.491754919	0.99718055
WBGene00003162	592.3456385	0.100670259	0.095162121	1.057881624	0.290109414	0.99718055
WBGene00003163	46.5297258	0.087973662	0.147708875	0.595588196	0.551450364	0.99718055
WBGene00003164	326.7946123	0.005109831	0.128572936	0.039742665	0.968298287	0.99718055
WBGene00003165	0.849862157	0.056671577	0.052520353	1.079040291	0.280569767	0.99718055
WBGene00003166	0.327785347	-0.031051515	0.033835874	-0.917709853	0.358770788	0.99718055
WBGene00003168	2.348606137	-0.056528413	0.09524717	-0.593491786	0.552852078	0.99718055
WBGene00003169	0.132715859	0.004261962	0.027179963	0.156805309	0.875398289	0.99718055
WBGene00003170	7.39162635	0.110621565	0.141170609	0.783601954	0.433273709	0.99718055
WBGene00003171	1.528007382	0.075194276	0.067053024	1.121415129	0.262111199	0.99718055
WBGene00003172	53.48658259	0.03796974	0.143882944	0.263893265	0.791862165	0.99718055
WBGene00003173	0.624007824	0.020583494	0.050429633	0.408162687	0.68315424	0.99718055
WBGene00003174	0.47606604	-0.033614179	0.042030928	-0.79974867	0.423856428	0.99718055
WBGene00003175	1.944824673	0.017150612	0.09551206	0.179564881	0.857494178	0.99718055
WBGene00003176	4.680652523	-0.036242083	0.123368164	-0.293771764	0.768932313	0.99718055
WBGene00003177	676.286378	-0.063442221	0.094937013	-0.668255921	0.503970245	0.99718055
WBGene00003178	7.099998781	-0.109138194	0.137285103	-0.794974777	0.426628174	0.99718055
WBGene00003180	0.325523693	-0.010822465	0.027900687	-0.387892407	0.698095658	0.99718055
WBGene00003181	0.262017981	-0.012687716	0.027179963	-0.466804039	0.640640086	0.99718055
WBGene00003182	1552.063433	0.023530353	0.11892322	0.197861722	0.843153253	0.99718055
WBGene00003183	1243.17347	0.005802443	0.096035213	0.060419957	0.951821165	0.99718055
WBGene00003184	882.4331146	0.054568629	0.129244386	0.422212763	0.672869726	0.99718055
WBGene00003185	100.3902626	-0.053098677	0.140608596	-0.377634642	0.705702027	0.99718055
WBGene00003186	762.977742	0.011564428	0.078660749	0.147016495	0.883119	0.99718055
WBGene00003196	560.9534214	0.057943836	0.102378604	0.56597603	0.571410075	0.99718055
WBGene00003209	355.3364045	0.056998386	0.089629029	0.635936674	0.524817698	0.99718055
WBGene00003210	2715.244818	0.075836703	0.14346486	0.528608212	0.597077263	0.99718055
WBGene00003214	2235.266295	0.005378282	0.13708726	0.039232543	0.968704988	0.99718055
WBGene00003216	1352.876861	0.077621408	0.135293251	0.573727124	0.566152471	0.99718055
WBGene00003218	4339.457342	0.021523868	0.130228865	0.165277249	0.868725765	0.99718055
WBGene00003219	72.71437587	-0.081626226	0.145206018	-0.562140794	0.574020096	0.99718055
WBGene00003220	599.5442575	0.060826791	0.117015383	0.519818756	0.603189905	0.99718055
WBGene00003221	272.0085545	0.008953476	0.101157997	0.088509819	0.929471481	0.99718055
WBGene00003222	1298.609131	0.017194956	0.113713896	0.151212442	0.879808136	0.99718055
WBGene00003224	360.2154877	0.120886088	0.110186891	1.097100451	0.272597483	0.99718055
WBGene00003225	385.4957676	-0.016169527	0.147197875	-0.109848919	0.912529194	0.99718055
WBGene00003228	548.0915629	0.109625885	0.115835085	0.946396204	0.343946541	0.99718055
WBGene00003229	390.4345166	0.091366467	0.091283997	1.000903435	0.316873496	0.99718055
WBGene00003230	711.6083526	0.016317818	0.098170668	0.16621888	0.867984702	0.99718055
WBGene00003231	589.0612963	0.072213107	0.085422951	0.845359551	0.397910121	0.99718055
WBGene00003232	0.95984157	-0.026795538	0.057680248	-0.464553105	0.642251521	0.99718055
WBGene00003233	29.90900849	0.012014692	0.143673001	0.083625257	0.933354385	0.99718055
WBGene00003234	28.38996357	0.024173833	0.153819735	0.157156904	0.875121192	0.99718055
WBGene00003235	664.1601861	-0.342885657	0.123398172	-2.778693162	0.005457805	0.99718055
WBGene00003236	81.9039673	0.158065514	0.130989202	1.206706449	0.227545215	0.99718055
WBGene00003237	2.290086374	0.056626995	0.09313965	0.607979467	0.543201092	0.99718055
WBGene00003238	41.02194945	0.178290251	0.154541865	1.153669596	0.248635653	0.99718055
WBGene00003239	32.40365508	0.287989608	0.156935758	1.835079608	0.066493895	0.99718055
WBGene00003241	774.9880498	0.060816211	0.112229904	0.541889541	0.587894603	0.99718055
WBGene00003242	15.9321353	-0.073979231	0.150663191	-0.491023921	0.623409529	0.99718055
WBGene00003243	16.33807066	-0.053654906	0.149616806	-0.358615499	0.719882751	0.99718055
WBGene00003245	1.470407242	0.103800364	0.078623792	1.320215695	0.186763013	0.99718055
WBGene00003246	83.54680941	-0.005548668	0.137746583	-0.040281709	0.967868536	0.99718055
WBGene00003247	86.63111638	0.007071002	0.151562164	0.046654137	0.962788884	0.99718055
WBGene00003248	0.278021751	-0.000835804	0.032551261	-0.025676546	0.979515331	0.99718055
WBGene00003249	0.609999159	0.037857191	0.043775156	0.864809965	0.387143101	0.99718055
WBGene00003252	92.5087056	0.103951256	0.154311911	0.67364376	0.500537825	0.99718055
WBGene00003253	662.7557882	0.136787245	0.10773407	1.269674899	0.204200458	0.99718055
WBGene00003254	20.80891941	0.016600103	0.155373888	0.106839723	0.914916133	0.99718055
WBGene00003258	169.1626771	0.073429708	0.119597697	0.613972588	0.539233441	0.99718055
WBGene00003261	1.524465094	-0.050790815	0.074624952	-0.680614369	0.496115533	0.99718055
WBGene00003262	0.10822096	0.001840573	0.027179963	0.067718012	0.946010111	0.99718055
WBGene00003263	4.90111954	-0.025907215	0.117691403	-0.220128358	0.82577119	0.99718055
WBGene00003264	7.316993515	-0.244245492	0.142505702	-1.713934871	0.086540688	0.99718055
WBGene00003265	0.222707209	-0.003002182	0.027179963	-0.110455716	0.912047968	0.99718055
WBGene00003266	4.358492053	-0.030043696	0.116498678	-0.257888729	0.796492784	0.99718055
WBGene00003267	0.132715859	0.004261962	0.027179963	0.156805309	0.875398289	0.99718055
WBGene00003268	8.549202309	0.178753852	0.140938233	1.268313412	0.204686049	0.99718055
WBGene00003269	6.455455561	-0.028979332	0.135505065	-0.213861614	0.830654975	0.99718055
WBGene00003270	1.016677777	-0.010396127	0.060555838	-0.171678363	0.863690397	0.99718055
WBGene00003271	0.443551109	-0.009252727	0.030017478	-0.308244649	0.75789618	0.99718055
WBGene00003272	1.421308086	0.084511826	0.071433545	1.183083184	0.236776182	0.99718055
WBGene00003273	0.707203181	-0.001870979	0.053429735	-0.035017552	0.972065745	0.99718055
WBGene00003274	0.596205342	0.016824993	0.04413721	0.381197483	0.703056717	0.99718055
WBGene00003278	0.194625967	0.004261962	0.027179963	0.156805309	0.875398289	0.99718055
WBGene00003279	43.24032055	-0.04466288	0.1522493	-0.293353599	0.769251889	0.99718055
WBGene00003280	2.618985064	0.014972837	0.098063637	0.152684908	0.878646763	0.99718055
WBGene00003281	5.591241022	0.043554573	0.129213032	0.337075697	0.736059837	0.99718055
WBGene00003282	1.519045333	0.018011817	0.075627604	0.238164591	0.811753439	0.99718055
WBGene00003283	0.527478792	0.013360314	0.042075496	0.317531934	0.750840013	0.99718055
WBGene00003284	0.484107205	0.032372062	0.042155525	0.767919776	0.442534847	0.99718055
WBGene00003286	2.094798166	-0.054487395	0.088758672	-0.613882493	0.53929298	0.99718055
WBGene00003288	3.619523388	0.020771415	0.107537758	0.193154619	0.846837878	0.99718055
WBGene00003289	10.90299414	0.158301445	0.145296897	1.089503271	0.275932013	0.99718055
WBGene00003291	0.320310379	-0.00059971	0.027615658	-0.021716295	0.982674265	0.99718055
WBGene00003292	3.257373857	0.06692703	0.10653373	0.628223847	0.52985731	0.99718055
[truncated: 43,648 more rows]
