# Supplementary material for: Stress resets ancestral heritable small RNA responses
Source: eLife journal article supplement (doi:10.7554/elife.65797), 2021-03-16
Supplement: supp [file elife-65797-supp-v1.zip › elife_poa_e65797_Supplementary_file_3.csv]

Category	Term	Counts	ListSize	PopHit	Pop Size	Pvalue	Bonferroni	FDR	OverlappedID	Refs
TF Targets	Targets of DEAD box (mut-14, smut-1) influenced endogenous siRNAs	116	280	2022	29469	1.23E-59	2.83E-56	2.83E-56	WBGene00077437;WBGene00006384;WBGene00010507;WBGene00016070;WBGene00012985;WBGene00077558;WBGene00007485;WBGene00008517;WBGene00021019;WBGene00077728;WBGene00001119;WBGene00012018;WBGene00013638;WBGene00000685;WBGene00185118;WBGene00044502;WBGene00003235;WBGene00021461;WBGene00015819;WBGene00000207;WBGene00001911;WBGene00010204;WBGene00021884;WBGene00022729;WBGene00045289;WBGene00021018;WBGene000…	http://www.ncbi.nlm.nih.gov/pubmed/24684932
Mutants	down in antisense 22G-RNAs by rde-8(ne3361) mutant	113	280	2062	29469	8.62E-56	1.98E-52	9.88E-53	WBGene00077437;WBGene00219307;WBGene00006384;WBGene00010507;WBGene00012985;WBGene00194955;WBGene00077558;WBGene00021019;WBGene00018929;WBGene00013638;WBGene00000685;WBGene00185118;WBGene00185118;WBGene00044502;WBGene00044502;WBGene00021461;WBGene00015819;WBGene00000207;WBGene00021884;WBGene00022729;WBGene00022729;WBGene00007892;WBGene00021018;WBGene00044586;WBGene00003989;WBGene00022020;WBGene000…	http://www.ncbi.nlm.nih.gov/pubmed/25635455
Mutants	down in antisense 22G-RNAs by nyn-1; nyn-2 mutants	95	280	1514	29469	8.50E-51	1.95E-47	6.50E-48	WBGene00077437;WBGene00219307;WBGene00006384;WBGene00010507;WBGene00012985;WBGene00194955;WBGene00077558;WBGene00021019;WBGene00077728;WBGene00012018;WBGene00018929;WBGene00013638;WBGene00000685;WBGene00185118;WBGene00044502;WBGene00003235;WBGene00000465;WBGene00021461;WBGene00000207;WBGene00021884;WBGene00022729;WBGene00007892;WBGene00021018;WBGene00022020;WBGene00021589;WBGene00019789;WBGene000…	http://www.ncbi.nlm.nih.gov/pubmed/25635455
TF Targets	Reduced siRNA reads by mut-16(pk710) mutant	121	280	2965	29469	1.13E-46	2.58E-43	6.45E-44	WBGene00077437;WBGene00006384;WBGene00010507;WBGene00016070;WBGene00012985;WBGene00077558;WBGene00007485;WBGene00008517;WBGene00021019;WBGene00077728;WBGene00001119;WBGene00013638;WBGene00000685;WBGene00185118;WBGene00044502;WBGene00003235;WBGene00000465;WBGene00001686;WBGene00012020;WBGene00021461;WBGene00015819;WBGene00000207;WBGene00001911;WBGene00021884;WBGene00022729;WBGene00045289;WBGene000…	http://www.ncbi.nlm.nih.gov/pubmed/21245313
Mutants	down in antisense 22G-RNAs by gfp::rde-8(D76N) (function loss)	82	280	1337	29469	1.99E-42	4.57E-39	9.13E-40	WBGene00077437;WBGene00219307;WBGene00006384;WBGene00010507;WBGene00012985;WBGene00194955;WBGene00077558;WBGene00007485;WBGene00021019;WBGene00018929;WBGene00013638;WBGene00000685;WBGene00185118;WBGene00044502;WBGene00003235;WBGene00021461;WBGene00000207;WBGene00021884;WBGene00022729;WBGene00007892;WBGene00021018;WBGene00044586;WBGene00022020;WBGene00021589;WBGene00019789;WBGene00021148;WBGene000…	http://www.ncbi.nlm.nih.gov/pubmed/25635455
TF Targets	Targeted by mut-7, rde-3 and MAGO12	75	280	1092	29469	7.48E-42	1.71E-38	2.86E-39	WBGene00006384;WBGene00016070;WBGene00012985;WBGene00077558;WBGene00007485;WBGene00008517;WBGene00077728;WBGene00000685;WBGene00003235;WBGene00000207;WBGene00001911;WBGene00021884;WBGene00022729;WBGene00007892;WBGene00021018;WBGene00044586;WBGene00022020;WBGene00019598;WBGene00021148;WBGene00022110;WBGene00006062;WBGene00022730;WBGene00044167;WBGene00008007;WBGene00019267;WBGene00020902;WBGene000…	http://www.ncbi.nlm.nih.gov/pubmed/19800275
Other	Depleted for antisense 22G-RNAs	133	280	4173	29469	2.91E-40	6.66E-37	9.52E-38	WBGene00006384;WBGene00016070;WBGene00012985;WBGene00077558;WBGene00007485;WBGene00008517;WBGene00077728;WBGene00018491;WBGene00001119;WBGene00000685;WBGene00044502;WBGene00003235;WBGene00000465;WBGene00001686;WBGene00012020;WBGene00015819;WBGene00000207;WBGene00021884;WBGene00007892;WBGene00044586;WBGene00003989;WBGene00022020;WBGene00019598;WBGene00000480;WBGene00005022;WBGene00019789;WBGene000…	http://www.ncbi.nlm.nih.gov/pubmed/19800275
TF Targets	WAGO 22G-RNA Targets	105	280	2704	29469	1.61E-37	3.69E-34	4.61E-35	WBGene00006384;WBGene00016070;WBGene00012985;WBGene00194955;WBGene00077558;WBGene00007485;WBGene00008517;WBGene00077728;WBGene00001119;WBGene00018929;WBGene00000685;WBGene00044502;WBGene00003235;WBGene00009081;WBGene00021461;WBGene00000207;WBGene00001911;WBGene00010204;WBGene00021884;WBGene00022729;WBGene00045289;WBGene00007892;WBGene00021018;WBGene00044586;WBGene00022020;WBGene00015796;WBGene000…	http://www.ncbi.nlm.nih.gov/pubmed/22738724
Other	Enriched of Antisense 22G-RNAs in the fem-1 Oocyte Library	99	280	2543	29469	3.90E-35	8.94E-32	9.93E-33	WBGene00006384;WBGene00010507;WBGene00016070;WBGene00012985;WBGene00007485;WBGene00008517;WBGene00021019;WBGene00077728;WBGene00013638;WBGene00000685;WBGene00044502;WBGene00003235;WBGene00021461;WBGene00000207;WBGene00001911;WBGene00022729;WBGene00021018;WBGene00044586;WBGene00022020;WBGene00019598;WBGene00021148;WBGene00022110;WBGene00001976;WBGene00022730;WBGene00008007;WBGene00019267;WBGene000…	http://www.ncbi.nlm.nih.gov/pubmed/19800275
TF Targets	decreased small RNAs reads by starved at P0	37	280	593	29469	1.01E-18	2.31E-15	2.31E-16	WBGene00185076;WBGene00077437;WBGene00006384;WBGene00010507;WBGene00077558;WBGene00195233;WBGene00021019;WBGene00012018;WBGene00018929;WBGene00044728;WBGene00013638;WBGene00006926;WBGene00185118;WBGene00010204;WBGene00006929;WBGene00021018;WBGene00021589;WBGene00044167;WBGene00006927;WBGene00194981;WBGene00011812;WBGene00044439;WBGene00022486;WBGene00045410;WBGene00004076;WBGene00014562;WBGene001…	http://www.ncbi.nlm.nih.gov/pubmed/25018105
DAF/Insulin/food	Inherited small RNAs reads changed by starved at F3	31	280	460	29469	1.35E-16	3.10E-13	2.82E-14	WBGene00185076;WBGene00077437;WBGene00006384;WBGene00010507;WBGene00197483;WBGene00195233;WBGene00021019;WBGene00018929;WBGene00044728;WBGene00013638;WBGene00006926;WBGene00000465;WBGene00010204;WBGene00006929;WBGene00021018;WBGene00006927;WBGene00194981;WBGene00011812;WBGene00044439;WBGene00045410;WBGene00004076;WBGene00012319;WBGene00197130;WBGene00194681;WBGene00001178;WBGene00200252;WBGene000…	http://www.ncbi.nlm.nih.gov/pubmed/25018105
Other	Enriched for antisense 22G-RNAs	14	280	79	29469	5.87E-13	1.35E-09	1.12E-10	WBGene00010507;WBGene00021019;WBGene00012018;WBGene00013638;WBGene00022729;WBGene00021018;WBGene00021589;WBGene00022730;WBGene00044167;WBGene00010011;WBGene00022486;WBGene00045410;WBGene00044478;WBGene00012452	http://www.ncbi.nlm.nih.gov/pubmed/19800275
TF Targets	Reduce small RNAs reads by adr-1;adr-2 mutant	53	280	1833	29469	1.15E-12	2.64E-09	2.03E-10	WBGene00018491;WBGene00015565;WBGene00000465;WBGene00012020;WBGene00001911;WBGene00005022;WBGene00007709;WBGene00045382;WBGene00044213;WBGene00045272;WBGene00004374;WBGene00000408;WBGene00015658;WBGene00006537;WBGene00004027;WBGene00021549;WBGene00001161;WBGene00003948;WBGene00004076;WBGene00011511;WBGene00004241;WBGene00000837;WBGene00007010;WBGene00019433;WBGene00010908;WBGene00011720;WBGene000…	http://www.ncbi.nlm.nih.gov/pubmed/22673872
TF Targets	21U-RNA targets	21	280	267	29469	1.50E-12	3.45E-09	2.46E-10	WBGene00016070;WBGene00194955;WBGene00007485;WBGene00008517;WBGene00010204;WBGene00022020;WBGene00021148;WBGene00022110;WBGene00044413;WBGene00019267;WBGene00017796;WBGene00015488;WBGene00003917;WBGene00018186;WBGene00001459;WBGene00044436;WBGene00044799;WBGene00009572;WBGene00000177;WBGene00020146;WBGene00004700	http://www.ncbi.nlm.nih.gov/pubmed/22738724
TF Targets	Targets of eri-6/7-dependent siRNAs, embryo	13	280	76	29469	7.73E-12	1.77E-08	1.18E-09	WBGene00077437;WBGene00010507;WBGene00021019;WBGene00044728;WBGene00013638;WBGene00185118;WBGene00022729;WBGene00021018;WBGene00022730;WBGene00045382;WBGene00044439;WBGene00045410;WBGene00012452	http://www.ncbi.nlm.nih.gov/pubmed/22102828
TF Targets	depleted of 22G-RNAs in rrf-3 mutant	14	280	100	29469	1.33E-11	3.04E-08	1.86E-09	WBGene00010507;WBGene00021019;WBGene00013638;WBGene00022729;WBGene00021018;WBGene00021589;WBGene00022730;WBGene00044167;WBGene00010011;WBGene00022486;WBGene00045410;WBGene00044478;WBGene00012452;WBGene00000463	http://www.ncbi.nlm.nih.gov/pubmed/20133583
Other	Enriched for antisense 22G-RNAs in the CSR-1 IP	83	280	4085	29469	1.38E-11	3.17E-08	1.86E-09	WBGene00018491;WBGene00009444;WBGene00015565;WBGene00000465;WBGene00001686;WBGene00012020;WBGene00000392;WBGene00003989;WBGene00000480;WBGene00005022;WBGene00007709;WBGene00011451;WBGene00020115;WBGene00022251;WBGene00003776;WBGene00004374;WBGene00000408;WBGene00021973;WBGene00015658;WBGene00006537;WBGene00004027;WBGene00044439;WBGene00021549;WBGene00001161;WBGene00003948;WBGene00008140;WBGene000…	http://www.ncbi.nlm.nih.gov/pubmed/19804758
Mutants	UP by hrde-1 mutant	19	280	238	29469	1.72E-11	3.95E-08	2.20E-09	WBGene00010507;WBGene00018929;WBGene00013638;WBGene00044502;WBGene00044586;WBGene00019598;WBGene00019789;WBGene00018310;WBGene00012374;WBGene00020451;WBGene00002063;WBGene00044541;WBGene00021606;WBGene00009572;WBGene00012228;WBGene00007303;WBGene00015366;WBGene00017186;WBGene00016072	http://www.ncbi.nlm.nih.gov/pubmed/26779286
Other	enriched by dsRNA-specific antibody:J2 (wild-type)	66	280	2850	29469	1.83E-11	4.20E-08	2.21E-09	WBGene00198725;WBGene00006384;WBGene00200337;WBGene00199371;WBGene00012018;WBGene00044728;WBGene00196042;WBGene00006926;WBGene00000465;WBGene00009081;WBGene00000207;WBGene00006929;WBGene00000392;WBGene00004246;WBGene00197408;WBGene00202494;WBGene00000480;WBGene00022110;WBGene00006062;WBGene00007709;WBGene00000368;WBGene00006927;WBGene00003776;WBGene00004374;WBGene00198462;WBGene00015658;WBGene000…	http://www.ncbi.nlm.nih.gov/pubmed/25391662
TF Targets	enriched by ergo-1 IP	11	280	48	29469	2.43E-11	5.57E-08	2.79E-09	WBGene00010507;WBGene00021019;WBGene00013638;WBGene00022729;WBGene00021018;WBGene00022730;WBGene00044167;WBGene00045382;WBGene00045410;WBGene00044478;WBGene00012452	http://www.ncbi.nlm.nih.gov/pubmed/20133583
TF Targets	CSR-1 22G-RNA targets	76	280	3608	29469	2.81E-11	6.44E-08	3.07E-09	WBGene00018491;WBGene00009444;WBGene00015565;WBGene00006926;WBGene00001686;WBGene00012020;WBGene00000392;WBGene00003989;WBGene00005022;WBGene00007709;WBGene00011451;WBGene00020115;WBGene00022251;WBGene00003776;WBGene00004374;WBGene00000408;WBGene00021973;WBGene00015658;WBGene00006537;WBGene00004027;WBGene00021549;WBGene00001161;WBGene00003948;WBGene00008140;WBGene00016381;WBGene00003926;WBGene000…	http://www.ncbi.nlm.nih.gov/pubmed/22738724
TF Targets	depleted of 22G-RNAs in ergo-1 mutant	13	280	86	29469	3.50E-11	8.03E-08	3.65E-09	WBGene00010507;WBGene00021019;WBGene00013638;WBGene00022729;WBGene00021018;WBGene00021589;WBGene00022730;WBGene00044167;WBGene00044213;WBGene00022486;WBGene00045410;WBGene00044478;WBGene00012452	http://www.ncbi.nlm.nih.gov/pubmed/20133583
TF Targets	Reduce small RNAs reads by adr-1 mutant	39	280	1192	29469	7.08E-11	1.62E-07	7.06E-09	WBGene00010507;WBGene00012985;WBGene00007485;WBGene00021019;WBGene00015565;WBGene00000465;WBGene00001911;WBGene00006929;WBGene00021018;WBGene00044586;WBGene00019789;WBGene00001976;WBGene00006062;WBGene00022730;WBGene00044413;WBGene00018075;WBGene00012953;WBGene00004374;WBGene00004027;WBGene00019574;WBGene00022486;WBGene00045410;WBGene00002063;WBGene00004241;WBGene00007010;WBGene00000770;WBGene000…	http://www.ncbi.nlm.nih.gov/pubmed/22673872
TF Targets	Top 98 WAGO-1 IP Targets	13	280	93	29469	8.99E-11	2.06E-07	8.59E-09	WBGene00008517;WBGene00001976;WBGene00018310;WBGene00003884;WBGene00045272;WBGene00021606;WBGene00009572;WBGene00012228;WBGene00007303;WBGene00015366;WBGene00020146;WBGene00045297;WBGene00012577	http://www.ncbi.nlm.nih.gov/pubmed/19800275
Development/Dauer/Aging	down by aging on day 10	63	280	2769	29469	1.29E-10	2.97E-07	1.19E-08	WBGene00018491;WBGene00009444;WBGene00012018;WBGene00015565;WBGene00006926;WBGene00000465;WBGene00009081;WBGene00001686;WBGene00012020;WBGene00000207;WBGene00010204;WBGene00006929;WBGene00000392;WBGene00003989;WBGene00019598;WBGene00005022;WBGene00007709;WBGene00017796;WBGene00006927;WBGene00004374;WBGene00015658;WBGene00006537;WBGene00004027;WBGene00001161;WBGene00003948;WBGene00004076;WBGene000…	http://www.ncbi.nlm.nih.gov/pubmed/26623667
DAF/Insulin/food	down by daf-2 mutant (day 6)	18	280	236	29469	1.37E-10	3.13E-07	1.20E-08	WBGene00006926;WBGene00000465;WBGene00001686;WBGene00012020;WBGene00000207;WBGene00010204;WBGene00006929;WBGene00004246;WBGene00007709;WBGene00006927;WBGene00006537;WBGene00003948;WBGene00004241;WBGene00022037;WBGene00004361;WBGene00004465;WBGene00003214;WBGene00006930	http://www.ncbi.nlm.nih.gov/pubmed/15837805
TF Targets	oma-1 associated genes	85	280	4453	29469	1.73E-10	3.98E-07	1.47E-08	WBGene00219707;WBGene00006384;WBGene00077558;WBGene00018491;WBGene00018929;WBGene00219571;WBGene00044502;WBGene00003235;WBGene00000465;WBGene00009081;WBGene00012020;WBGene00021461;WBGene00015819;WBGene00021884;WBGene00045289;WBGene00000392;WBGene00004246;WBGene00007892;WBGene00019598;WBGene00000480;WBGene00005022;WBGene00019789;WBGene00044167;WBGene00044413;WBGene00019538;WBGene00007709;WBGene000…	https://www.ncbi.nlm.nih.gov/pubmed/28576864
DAF/Insulin/food	down by TGFbeta, adults	81	280	4181	29469	2.89E-10	6.64E-07	2.37E-08	WBGene00008517;WBGene00001119;WBGene00009444;WBGene00000465;WBGene00012020;WBGene00015819;WBGene00021884;WBGene00022729;WBGene00000392;WBGene00004246;WBGene00003989;WBGene00021589;WBGene00000480;WBGene00005022;WBGene00019789;WBGene00022110;WBGene00008007;WBGene00019267;WBGene00007709;WBGene00011451;WBGene00010484;WBGene00009310;WBGene00020115;WBGene00010734;WBGene00022251;WBGene00004374;WBGene000…	http://www.ncbi.nlm.nih.gov/pubmed/17900898
Mutants	Depleted in small RNA libraries from ego-1 mutant	52	280	2079	29469	3.69E-10	8.47E-07	2.92E-08	WBGene00016070;WBGene00012985;WBGene00007485;WBGene00008517;WBGene00003235;WBGene00000465;WBGene00009081;WBGene00001686;WBGene00022729;WBGene00019598;WBGene00001976;WBGene00008007;WBGene00019267;WBGene00007709;WBGene00000368;WBGene00045382;WBGene00044213;WBGene00017796;WBGene00012374;WBGene00004374;WBGene00006537;WBGene00044439;WBGene00045410;WBGene00020451;WBGene00007924;WBGene00011511;WBGene000…	http://www.ncbi.nlm.nih.gov/pubmed/19804758
Chemicals/stress	UP by H2S 48H	56	280	2380	29469	5.90E-10	1.35E-06	4.51E-08	WBGene00010507;WBGene00016070;WBGene00008517;WBGene00021019;WBGene00009444;WBGene00018929;WBGene00044502;WBGene00021461;WBGene00015819;WBGene00001911;WBGene00021884;WBGene00021018;WBGene00022020;WBGene00019598;WBGene00019789;WBGene00044167;WBGene00044413;WBGene00019538;WBGene00019267;WBGene00010484;WBGene00044213;WBGene00019198;WBGene00012374;WBGene00000408;WBGene00011812;WBGene00004027;WBGene000…	http://www.ncbi.nlm.nih.gov/pubmed/21980473
TF Targets	Reduced siRNA reads by mut-16(mg461) mutant	15	280	170	29469	1.05E-09	2.41E-06	7.76E-08	WBGene00077437;WBGene00010507;WBGene00021019;WBGene00044502;WBGene00000465;WBGene00021018;WBGene00022730;WBGene00044167;WBGene00004374;WBGene00006537;WBGene00022486;WBGene00014562;WBGene00001607;WBGene00044478;WBGene00012452	http://www.ncbi.nlm.nih.gov/pubmed/21245313
Tissue	down in germline-ablated animals	43	280	1582	29469	1.71E-09	3.92E-06	1.22E-07	WBGene00015565;WBGene00000465;WBGene00012020;WBGene00015819;WBGene00003989;WBGene00005022;WBGene00019789;WBGene00007709;WBGene00022251;WBGene00004374;WBGene00006537;WBGene00004027;WBGene00003948;WBGene00008140;WBGene00016381;WBGene00003926;WBGene00004241;WBGene00010908;WBGene00000867;WBGene00020038;WBGene00001607;WBGene00014117;WBGene00008131;WBGene00004386;WBGene00004702;WBGene00022037;WBGene000…	http://www.ncbi.nlm.nih.gov/pubmed/25093668
Mutants	UP by met-2 set-25 mutant L1	25	280	579	29469	2.01E-09	4.60E-06	1.39E-07	WBGene00044728;WBGene00000685;WBGene00044502;WBGene00001686;WBGene00012020;WBGene00015819;WBGene00021884;WBGene00004246;WBGene00022110;WBGene00219918;WBGene00044213;WBGene00018310;WBGene00017796;WBGene00206493;WBGene00018664;WBGene00002063;WBGene00021658;WBGene00000770;WBGene00001607;WBGene00220084;WBGene00009572;WBGene00013270;WBGene00018658;WBGene00014977;WBGene00012898	http://www.ncbi.nlm.nih.gov/geo/query/acc.cgi?acc=GSE79597
Microbes	Down infected by PA14 octr-1 mutant vs. N2	27	280	718	29469	6.89E-09	1.58E-05	4.64E-07	WBGene00001119;WBGene00006926;WBGene00000465;WBGene00001686;WBGene00012020;WBGene00006929;WBGene00019598;WBGene00019267;WBGene00007709;WBGene00006927;WBGene00004374;WBGene00000408;WBGene00011812;WBGene00004027;WBGene00004241;WBGene00021658;WBGene00000867;WBGene00001607;WBGene00014117;WBGene00009701;WBGene00020630;WBGene00018013;WBGene00019017;WBGene00000264;WBGene00003184;WBGene00020684;WBGene000…	http://www.ncbi.nlm.nih.gov/pubmed/21474712
Tissue	down in gonad-ablated animals	59	280	2777	29469	7.79E-09	1.79E-05	5.10E-07	WBGene00018491;WBGene00009444;WBGene00044728;WBGene00015565;WBGene00000465;WBGene00012020;WBGene00015819;WBGene00003989;WBGene00005022;WBGene00019789;WBGene00007709;WBGene00011451;WBGene00010484;WBGene00045272;WBGene00020115;WBGene00010734;WBGene00022251;WBGene00004374;WBGene00000408;WBGene00006537;WBGene00004027;WBGene00001161;WBGene00003948;WBGene00008140;WBGene00016381;WBGene00003926;WBGene000…	http://www.ncbi.nlm.nih.gov/pubmed/25093668
TF Targets	LIN-15B L3 Targets	53	280	2383	29469	1.32E-08	3.03E-05	8.42E-07	WBGene00006384;WBGene00008517;WBGene00018491;WBGene00001119;WBGene00000207;WBGene00021884;WBGene00007892;WBGene00044586;WBGene00003989;WBGene00000480;WBGene00005022;WBGene00001976;WBGene00044413;WBGene00007709;WBGene00000368;WBGene00010484;WBGene00018075;WBGene00008446;WBGene00000408;WBGene00015658;WBGene00006537;WBGene00010011;WBGene00001161;WBGene00003948;WBGene00007924;WBGene00011511;WBGene000…	http://www.ncbi.nlm.nih.gov/pubmed/21177963
Other	enriched by dsRNA-specific antibody:J2 (tdp-1(ok803) vs. wild-type)	41	280	1572	29469	1.42E-08	3.26E-05	8.82E-07	WBGene00010507;WBGene00199371;WBGene00198190;WBGene00012018;WBGene00044728;WBGene00006926;WBGene00000465;WBGene00000207;WBGene00010204;WBGene00006929;WBGene00003989;WBGene00019598;WBGene00197408;WBGene00000480;WBGene00000368;WBGene00006927;WBGene00008446;WBGene00012374;WBGene00197277;WBGene00021973;WBGene00194981;WBGene00006537;WBGene00044439;WBGene00016381;WBGene00004126;WBGene00001178;WBGene000…	http://www.ncbi.nlm.nih.gov/pubmed/25391662
Mutants	Down pie-1; pal-1(RNAi) mutant 83 min after 4 cell stage	37	280	1326	29469	1.61E-08	3.70E-05	9.73E-07	WBGene00018491;WBGene00000685;WBGene00000465;WBGene00012020;WBGene00003989;WBGene00019538;WBGene00007709;WBGene00018310;WBGene00000408;WBGene00006537;WBGene00004027;WBGene00021549;WBGene00004076;WBGene00007924;WBGene00004241;WBGene00000837;WBGene00012423;WBGene00004126;WBGene00004702;WBGene00022099;WBGene00004163;WBGene00009701;WBGene00006796;WBGene00012326;WBGene00020146;WBGene00020630;WBGene000…	http://www.ncbi.nlm.nih.gov/pubmed/15772128
Mutants	Down glp-1 mutant	40	280	1525	29469	1.93E-08	4.42E-05	1.13E-06	WBGene00009444;WBGene00044502;WBGene00000465;WBGene00001686;WBGene00012020;WBGene00015819;WBGene00019598;WBGene00008007;WBGene00007709;WBGene00044213;WBGene00010734;WBGene00004374;WBGene00194981;WBGene00011812;WBGene00004027;WBGene00044439;WBGene00008140;WBGene00016381;WBGene00004241;WBGene00003917;WBGene00021658;WBGene00000770;WBGene00000867;WBGene00021606;WBGene00001607;WBGene00014117;WBGene000…	http://www.ncbi.nlm.nih.gov/pubmed/23499532
Mutants	Down efl-1/dpl-1 mutant	10	280	75	29469	4.03E-08	9.24E-05	2.31E-06	WBGene00015565;WBGene00000465;WBGene00001686;WBGene00012020;WBGene00005022;WBGene00004374;WBGene00006537;WBGene00001161;WBGene00001607;WBGene00014117	http://www.ncbi.nlm.nih.gov/pubmed/16854972
Mutants	down by jmjd-1.2 neuron expressed	51	280	2358	29469	6.55E-08	1.50E-04	3.66E-06	WBGene00077558;WBGene00021019;WBGene00077728;WBGene00009444;WBGene00015565;WBGene00003235;WBGene00001686;WBGene00012020;WBGene00015819;WBGene00001911;WBGene00021884;WBGene00000392;WBGene00003989;WBGene00015796;WBGene00019598;WBGene00000480;WBGene00022110;WBGene00044413;WBGene00008007;WBGene00007709;WBGene00010484;WBGene00045272;WBGene00008446;WBGene00010734;WBGene00000408;WBGene00017080;WBGene000…	http://www.ncbi.nlm.nih.gov/pubmed/27133168
Mutants	down by lem-2(tm1582) mutant and emr-1 RNAi	34	280	1231	29469	9.06E-08	2.08E-04	4.94E-06	WBGene00006384;WBGene00197401;WBGene00044502;WBGene00000465;WBGene00001686;WBGene00012020;WBGene00197666;WBGene00005022;WBGene00007709;WBGene00006927;WBGene00004374;WBGene00015658;WBGene00004027;WBGene00001161;WBGene00008140;WBGene00011511;WBGene00004241;WBGene00012319;WBGene00011720;WBGene00008733;WBGene00001258;WBGene00001607;WBGene00014117;WBGene00013270;WBGene00004386;WBGene00004702;WBGene000…	http://www.ncbi.nlm.nih.gov/pubmed/24490688
Mutants	down by tdp-1(ok803) mutant	27	280	821	29469	9.97E-08	2.29E-04	5.32E-06	WBGene00198814;WBGene00006926;WBGene00000465;WBGene00001686;WBGene00012020;WBGene00006929;WBGene00004246;WBGene00003989;WBGene00007709;WBGene00006927;WBGene00004374;WBGene00195813;WBGene00004076;WBGene00004241;WBGene00003917;WBGene00000770;WBGene00001258;WBGene00003130;WBGene00001607;WBGene00013270;WBGene00015366;WBGene00003067;WBGene00021507;WBGene00009161;WBGene00019017;WBGene00020684;WBGene000…	http://www.ncbi.nlm.nih.gov/pubmed/25391662
Other	UP Hyper Gravity	27	280	822	29469	1.02E-07	2.34E-04	5.32E-06	WBGene00001686;WBGene00012020;WBGene00006929;WBGene00000392;WBGene00005022;WBGene00045272;WBGene00006927;WBGene00010011;WBGene00004241;WBGene00003917;WBGene00011720;WBGene00012423;WBGene00001178;WBGene00001607;WBGene00014117;WBGene00022037;WBGene00009701;WBGene00007303;WBGene00018013;WBGene00012674;WBGene00017186;WBGene00050885;WBGene00008441;WBGene00011604;WBGene00020684;WBGene00000463;WBGene000…	http://www.ncbi.nlm.nih.gov/geo/query/acc.cgi?acc=GSE36358
TF Targets	MEP-1 Emb Targets	47	280	2155	29469	2.00E-07	4.58E-04	1.02E-05	WBGene00006384;WBGene00010507;WBGene00008517;WBGene00018491;WBGene00001119;WBGene00015819;WBGene00000207;WBGene00021018;WBGene00003989;WBGene00000480;WBGene00005022;WBGene00001976;WBGene00007709;WBGene00020902;WBGene00000368;WBGene00010484;WBGene00018075;WBGene00008446;WBGene00020115;WBGene00000408;WBGene00015488;WBGene00015658;WBGene00006537;WBGene00010011;WBGene00001161;WBGene00003948;WBGene000…	http://www.ncbi.nlm.nih.gov/pubmed/21177963
Development/Dauer/Aging	down by aging on day 5	51	280	2454	29469	2.23E-07	5.11E-04	1.11E-05	WBGene00077728;WBGene00018491;WBGene00012018;WBGene00015565;WBGene00006926;WBGene00003235;WBGene00000465;WBGene00001686;WBGene00012020;WBGene00015819;WBGene00010204;WBGene00006929;WBGene00000392;WBGene00003989;WBGene00005022;WBGene00044413;WBGene00019267;WBGene00007709;WBGene00006927;WBGene00010734;WBGene00004374;WBGene00004027;WBGene00003948;WBGene00008140;WBGene00016381;WBGene00011511;WBGene000…	http://www.ncbi.nlm.nih.gov/pubmed/26623667
TF Targets	PES-1 L4 Targets	48	280	2244	29469	2.50E-07	5.73E-04	1.22E-05	WBGene00006384;WBGene00008517;WBGene00018491;WBGene00001119;WBGene00000685;WBGene00015819;WBGene00000207;WBGene00021884;WBGene00044586;WBGene00003989;WBGene00000480;WBGene00005022;WBGene00001976;WBGene00007709;WBGene00018075;WBGene00020115;WBGene00018807;WBGene00000408;WBGene00015658;WBGene00006537;WBGene00010011;WBGene00001161;WBGene00016381;WBGene00012319;WBGene00010908;WBGene00011720;WBGene000…	http://www.ncbi.nlm.nih.gov/pubmed/21177963
TF Targets	dcr-1 targets (Rybak-Wolf)	36	280	1420	29469	2.67E-07	6.13E-04	1.28E-05	WBGene00010507;WBGene00018491;WBGene00012018;WBGene00000685;WBGene00006926;WBGene00000465;WBGene00012020;WBGene00010204;WBGene00006929;WBGene00003989;WBGene00015796;WBGene00000480;WBGene00007709;WBGene00004374;WBGene00006537;WBGene00045410;WBGene00004076;WBGene00004241;WBGene00003917;WBGene00000837;WBGene00007010;WBGene00001258;WBGene00001607;WBGene00013270;WBGene00016524;WBGene00022037;WBGene000…	http://www.ncbi.nlm.nih.gov/pubmed/25416952
Mutants	Down dpl-1 mutant	13	280	195	29469	4.09E-07	9.38E-04	1.90E-05	WBGene00018491;WBGene00015565;WBGene00000465;WBGene00001686;WBGene00012020;WBGene00005022;WBGene00004374;WBGene00006537;WBGene00004241;WBGene00001607;WBGene00014117;WBGene00003184;WBGene00020684	http://www.ncbi.nlm.nih.gov/pubmed/17096596
Development/Dauer/Aging	Down Day 8 on glp-1(e2141ts) vs. Wildtype	55	280	2807	29469	4.15E-07	9.52E-04	1.90E-05	WBGene00018491;WBGene00009444;WBGene00015565;WBGene00000465;WBGene00021884;WBGene00019598;WBGene00005022;WBGene00019789;WBGene00007709;WBGene00011451;WBGene00010734;WBGene00004374;WBGene00000408;WBGene00004027;WBGene00001161;WBGene00003948;WBGene00008140;WBGene00016381;WBGene00002063;WBGene00003926;WBGene00004241;WBGene00003917;WBGene00000837;WBGene00019433;WBGene00011720;WBGene00021658;WBGene000…	http://www.ncbi.nlm.nih.gov/pubmed/20555324
Mutants	down by met-2 mutant (eemb)	26	280	831	29469	4.60E-07	0.001054531	2.07E-05	WBGene00015565;WBGene00000465;WBGene00001686;WBGene00012020;WBGene00000392;WBGene00007892;WBGene00003989;WBGene00019598;WBGene00000480;WBGene00008446;WBGene00017080;WBGene00006537;WBGene00004027;WBGene00003948;WBGene00004241;WBGene00012423;WBGene00021658;WBGene00000770;WBGene00001607;WBGene00004702;WBGene00022099;WBGene00004163;WBGene00016150;WBGene00013768;WBGene00016072;WBGene00003184	https://www.ncbi.nlm.nih.gov/geo/query/acc.cgi?acc=GSE100726
Mutants	Targets 26G-RNAs in alg-3; alg-4 double mutant	30	280	1079	29469	5.49E-07	0.001258029	2.42E-05	WBGene00010507;WBGene00021019;WBGene00018491;WBGene00013638;WBGene00009081;WBGene00001686;WBGene00021018;WBGene00003989;WBGene00022730;WBGene00044167;WBGene00045382;WBGene00021973;WBGene00006537;WBGene00003948;WBGene00045410;WBGene00002063;WBGene00011511;WBGene00003926;WBGene00000770;WBGene00020038;WBGene00044478;WBGene00012452;WBGene00004465;WBGene00004700;WBGene00009161;WBGene00017999;WBGene000…	http://www.ncbi.nlm.nih.gov/pubmed/20133686
TF Targets	piRNA targets	28	280	967	29469	6.68E-07	0.00153271	2.89E-05	WBGene00008517;WBGene00003235;WBGene00021461;WBGene00000207;WBGene00019789;WBGene00021148;WBGene00022110;WBGene00020902;WBGene00000368;WBGene00018075;WBGene00018202;WBGene00010734;WBGene00007924;WBGene00003917;WBGene00002990;WBGene00011720;WBGene00001178;WBGene00000514;WBGene00001459;WBGene00012228;WBGene00000177;WBGene00015492;WBGene00013603;WBGene00020630;WBGene00004700;WBGene00015852;WBGene000…	http://www.ncbi.nlm.nih.gov/pubmed/22700655
TF Targets	eor-1 L3 targets	52	280	2623	29469	6.80E-07	0.001560135	2.89E-05	WBGene00006384;WBGene00008517;WBGene00018491;WBGene00000207;WBGene00007892;WBGene00003989;WBGene00001976;WBGene00006062;WBGene00007709;WBGene00020902;WBGene00000368;WBGene00010484;WBGene00018075;WBGene00000408;WBGene00017080;WBGene00015488;WBGene00015658;WBGene00006537;WBGene00001161;WBGene00003948;WBGene00020451;WBGene00007924;WBGene00011511;WBGene00003926;WBGene00012319;WBGene00000837;WBGene000…	http://www.ncbi.nlm.nih.gov/pubmed/21177963
Mutants	Down pie-1; pal-1(RNAi) mutant 53 min after 4 cell stage	42	280	1897	29469	7.38E-07	0.001692634	3.08E-05	WBGene00018491;WBGene00000465;WBGene00012020;WBGene00000207;WBGene00022729;WBGene00000480;WBGene00019538;WBGene00018075;WBGene00003776;WBGene00004374;WBGene00006537;WBGene00004027;WBGene00001161;WBGene00008140;WBGene00004241;WBGene00012319;WBGene00000837;WBGene00019433;WBGene00012423;WBGene00021658;WBGene00004126;WBGene00000867;WBGene00021710;WBGene00022037;WBGene00004163;WBGene00004361;WBGene000…	http://www.ncbi.nlm.nih.gov/pubmed/15772128
TF Targets	Increased small RNAs reads by starved at P0	21	280	575	29469	7.55E-07	0.001731822	3.09E-05	WBGene00197483;WBGene00077728;WBGene00003235;WBGene00000465;WBGene00021461;WBGene00000368;WBGene00010734;WBGene00017080;WBGene00015488;WBGene00012319;WBGene00197130;WBGene00200252;WBGene00013189;WBGene00016150;WBGene00020146;WBGene00013768;WBGene00018013;WBGene00012731;WBGene00010768;WBGene00017186;WBGene00016072	http://www.ncbi.nlm.nih.gov/pubmed/25018105
Mutants	down by jmjd-3.1 expressed	66	280	3741	29469	8.23E-07	0.001886396	3.31E-05	WBGene00077558;WBGene00077728;WBGene00018491;WBGene00009444;WBGene00015565;WBGene00003235;WBGene00001686;WBGene00012020;WBGene00015819;WBGene00001911;WBGene00021884;WBGene00000392;WBGene00003989;WBGene00015796;WBGene00000480;WBGene00022110;WBGene00022730;WBGene00044413;WBGene00008007;WBGene00007709;WBGene00020902;WBGene00010484;WBGene00044213;WBGene00045272;WBGene00008446;WBGene00010734;WBGene000…	http://www.ncbi.nlm.nih.gov/pubmed/27133168
TF Targets	fog-1 associated	9	280	81	29469	1.06E-06	0.002433198	4.20E-05	WBGene00000465;WBGene00012020;WBGene00021884;WBGene00004246;WBGene00007709;WBGene00004374;WBGene00000867;WBGene00001607;WBGene00014117	http://www.ncbi.nlm.nih.gov/pubmed/26564160
TF Targets	depleted of 22G-RNAs in rrf-1 mutant	14	280	256	29469	1.20E-06	0.002741963	4.65E-05	WBGene00010507;WBGene00021019;WBGene00013638;WBGene00022729;WBGene00021018;WBGene00021589;WBGene00022730;WBGene00044167;WBGene00019198;WBGene00022486;WBGene00007924;WBGene00044478;WBGene00012452;WBGene00015852	http://www.ncbi.nlm.nih.gov/pubmed/20133583
Mutants	Down pie-1; pal-1(RNAi) mutant 66 min after 4 cell stage	33	280	1323	29469	1.36E-06	0.003114471	5.19E-05	WBGene00018491;WBGene00009444;WBGene00000465;WBGene00001686;WBGene00012020;WBGene00003989;WBGene00004374;WBGene00000408;WBGene00017080;WBGene00004027;WBGene00003948;WBGene00002063;WBGene00011511;WBGene00004241;WBGene00012319;WBGene00000837;WBGene00019433;WBGene00012423;WBGene00000867;WBGene00003130;WBGene00013270;WBGene00004702;WBGene00022037;WBGene00009701;WBGene00012326;WBGene00013768;WBGene000…	http://www.ncbi.nlm.nih.gov/pubmed/15772128
TF Targets	MDL-1 L1 Targets	59	280	3246	29469	1.58E-06	0.003612577	5.92E-05	WBGene00006384;WBGene00010507;WBGene00008517;WBGene00018491;WBGene00001119;WBGene00015819;WBGene00000207;WBGene00010204;WBGene00000480;WBGene00001976;WBGene00006062;WBGene00007709;WBGene00000368;WBGene00010484;WBGene00008446;WBGene00020115;WBGene00000408;WBGene00017080;WBGene00015488;WBGene00015658;WBGene00006537;WBGene00001161;WBGene00003948;WBGene00004076;WBGene00007924;WBGene00011511;WBGene000…	http://www.ncbi.nlm.nih.gov/pubmed/21177963
Mutants	down by jmjd-1.2 expressed	41	280	1888	29469	1.68E-06	0.003853663	6.22E-05	WBGene00077558;WBGene00077728;WBGene00018491;WBGene00015565;WBGene00044502;WBGene00003235;WBGene00000207;WBGene00001911;WBGene00021884;WBGene00000392;WBGene00003989;WBGene00044413;WBGene00008007;WBGene00010484;WBGene00045272;WBGene00008446;WBGene00010734;WBGene00022251;WBGene00000408;WBGene00003948;WBGene00003926;WBGene00012319;WBGene00003917;WBGene00012423;WBGene00021658;WBGene00000770;WBGene000…	http://www.ncbi.nlm.nih.gov/pubmed/27133168
Mutants	down by set-25 mutant (eemb)	23	280	725	29469	2.01E-06	0.004601187	7.20E-05	WBGene00000465;WBGene00001686;WBGene00012020;WBGene00000392;WBGene00007892;WBGene00003989;WBGene00000480;WBGene00008446;WBGene00017080;WBGene00006537;WBGene00004027;WBGene00021549;WBGene00003948;WBGene00004241;WBGene00003917;WBGene00012423;WBGene00021658;WBGene00000770;WBGene00022037;WBGene00004163;WBGene00016150;WBGene00021507;WBGene00009161	https://www.ncbi.nlm.nih.gov/geo/query/acc.cgi?acc=GSE100726
TF Targets	Genes with Antisense Small RNAs Enriched by FLAG::csr-1 IP	86	280	5545	29469	2.03E-06	0.004656501	7.20E-05	WBGene00018491;WBGene00009444;WBGene00000465;WBGene00001686;WBGene00012020;WBGene00000392;WBGene00003989;WBGene00015796;WBGene00000480;WBGene00005022;WBGene00007709;WBGene00011451;WBGene00020115;WBGene00022251;WBGene00004374;WBGene00000408;WBGene00021973;WBGene00015658;WBGene00006537;WBGene00004027;WBGene00021549;WBGene00001161;WBGene00003948;WBGene00008140;WBGene00016381;WBGene00004076;WBGene000…	http://www.ncbi.nlm.nih.gov/pubmed/24360276
DAF/Insulin/food	decreased abundance by daf-2 mutant, proteomics	7	280	40	29469	2.04E-06	0.004679607	7.20E-05	WBGene00015565;WBGene00006926;WBGene00006929;WBGene00003989;WBGene00006927;WBGene00003214;WBGene00006930	http://www.ncbi.nlm.nih.gov/pubmed/17673661
Development/Dauer/Aging	Down Embryo vs. Old	28	280	1027	29469	2.09E-06	0.004787398	7.25E-05	WBGene00021019;WBGene00009444;WBGene00000465;WBGene00012020;WBGene00045289;WBGene00001976;WBGene00007709;WBGene00017796;WBGene00045272;WBGene00010057;WBGene00016381;WBGene00004241;WBGene00000867;WBGene00001607;WBGene00014117;WBGene00013270;WBGene00022099;WBGene00009701;WBGene00004700;WBGene00016151;WBGene00004312;WBGene00006571;WBGene00013307;WBGene00000264;WBGene00016702;WBGene00003184;WBGene000…	http://www.ncbi.nlm.nih.gov/pubmed/17472752
TF Targets	CEH-14 L2 targets	25	280	853	29469	2.52E-06	0.005772155	8.62E-05	WBGene00018491;WBGene00015819;WBGene00000207;WBGene00003989;WBGene00000480;WBGene00006062;WBGene00007709;WBGene00018807;WBGene00000408;WBGene00015658;WBGene00006537;WBGene00001161;WBGene00003948;WBGene00003926;WBGene00004241;WBGene00012319;WBGene00011720;WBGene00020038;WBGene00004702;WBGene00000177;WBGene00004700;WBGene00016151;WBGene00021507;WBGene00021637;WBGene00007119	http://www.ncbi.nlm.nih.gov/pubmed/21177963
Development/Dauer/Aging	down by aging on day 3	32	280	1297	29469	2.57E-06	0.005884461	8.65E-05	WBGene00018491;WBGene00012018;WBGene00003235;WBGene00000465;WBGene00001686;WBGene00012020;WBGene00015819;WBGene00010204;WBGene00006929;WBGene00000392;WBGene00005022;WBGene00007709;WBGene00006927;WBGene00004374;WBGene00004027;WBGene00003926;WBGene00004241;WBGene00019433;WBGene00000867;WBGene00001607;WBGene00014117;WBGene00004702;WBGene00022037;WBGene00009701;WBGene00018013;WBGene00004465;WBGene000…	http://www.ncbi.nlm.nih.gov/pubmed/26623667
Mutants	down by ceh-23 mutant	36	280	1577	29469	2.92E-06	0.006697909	9.71E-05	WBGene00009444;WBGene00006926;WBGene00000465;WBGene00001686;WBGene00012020;WBGene00015819;WBGene00006929;WBGene00004246;WBGene00015796;WBGene00019789;WBGene00007709;WBGene00011451;WBGene00006927;WBGene00004374;WBGene00004027;WBGene00044439;WBGene00016381;WBGene00004241;WBGene00021658;WBGene00000867;WBGene00001607;WBGene00014117;WBGene00044436;WBGene00015247;WBGene00004163;WBGene00009701;WBGene000…	http://www.ncbi.nlm.nih.gov/geo/query/acc.cgi?acc=GSE67754
Other	Change with siRNA reads, coding region, post duaer	18	280	472	29469	3.27E-06	0.007495123	1.07E-04	WBGene00010507;WBGene00000685;WBGene00000207;WBGene00022729;WBGene00022730;WBGene00000368;WBGene00018075;WBGene00006927;WBGene00016381;WBGene00019574;WBGene00022486;WBGene00019094;WBGene00020038;WBGene00015492;WBGene00020630;WBGene00012452;WBGene00008339;WBGene00001520	http://www.ncbi.nlm.nih.gov/pubmed/23329696
Mutants	UP by puf-8 mutant on fbf-1;lip-1	15	280	333	29469	4.26E-06	0.009777858	1.38E-04	WBGene00009444;WBGene00000465;WBGene00012020;WBGene00007709;WBGene00004374;WBGene00194981;WBGene00010011;WBGene00004027;WBGene00004241;WBGene00000867;WBGene00001607;WBGene00014117;WBGene00044436;WBGene00009701;WBGene00003184	http://www.ncbi.nlm.nih.gov/pubmed/25146970
Other	Cluster 12, constant expression postembryonic	76	280	4777	29469	4.44E-06	0.010191302	1.42E-04	WBGene00077728;WBGene00018491;WBGene00009444;WBGene00012018;WBGene00015565;WBGene00021884;WBGene00045289;WBGene00044586;WBGene00003989;WBGene00019598;WBGene00019789;WBGene00021148;WBGene00044167;WBGene00020902;WBGene00011451;WBGene00012953;WBGene00008446;WBGene00022251;WBGene00000408;WBGene00021973;WBGene00017080;WBGene00015658;WBGene00021549;WBGene00001161;WBGene00003948;WBGene00008140;WBGene000…	http://www.ncbi.nlm.nih.gov/pubmed/24036951
Mutants	Down miR-243 mutant	40	280	1897	29469	4.70E-06	0.010772707	1.48E-04	WBGene00006384;WBGene00016070;WBGene00008517;WBGene00009444;WBGene00006926;WBGene00000465;WBGene00001686;WBGene00012020;WBGene00006929;WBGene00004246;WBGene00019789;WBGene00007709;WBGene00006927;WBGene00004374;WBGene00011812;WBGene00004027;WBGene00001161;WBGene00016381;WBGene00004241;WBGene00003917;WBGene00011720;WBGene00021658;WBGene00000867;WBGene00001607;WBGene00014117;WBGene00018658;WBGene000…	http://www.ncbi.nlm.nih.gov/pubmed/20386745
Mutants	UP by fbf-1 mutant on puf-8;lip-1	10	280	131	29469	4.78E-06	0.010949657	1.48E-04	WBGene00000465;WBGene00012020;WBGene00021018;WBGene00007709;WBGene00004374;WBGene00004027;WBGene00004241;WBGene00014117;WBGene00007303;WBGene00003184	http://www.ncbi.nlm.nih.gov/pubmed/25146970
TF Targets	lin-41 associated genes	64	280	3781	29469	5.15E-06	0.011813413	1.58E-04	WBGene00006384;WBGene00018491;WBGene00000465;WBGene00009081;WBGene00012020;WBGene00015819;WBGene00021884;WBGene00045289;WBGene00000392;WBGene00004246;WBGene00007892;WBGene00000480;WBGene00005022;WBGene00007709;WBGene00000368;WBGene00018075;WBGene00018310;WBGene00004374;WBGene00021973;WBGene00015488;WBGene00004027;WBGene00021549;WBGene00001161;WBGene00045410;WBGene00020451;WBGene00007924;WBGene000…	https://www.ncbi.nlm.nih.gov/pubmed/28576864
Other	Germline nuclear RNAi-dependent heterochromatin	9	280	103	29469	6.55E-06	0.015022314	1.98E-04	WBGene00044586;WBGene00019598;WBGene00019789;WBGene00012374;WBGene00010734;WBGene00002063;WBGene00012228;WBGene00017186;WBGene00000264	http://www.ncbi.nlm.nih.gov/pubmed/25534009
Mutants	Down mex-3;skn-1 RNAi mutant 23min	38	280	1786	29469	7.14E-06	0.016370341	2.13E-04	WBGene00012018;WBGene00015565;WBGene00003235;WBGene00000465;WBGene00001686;WBGene00012020;WBGene00021461;WBGene00000207;WBGene00001911;WBGene00022729;WBGene00000480;WBGene00019538;WBGene00010057;WBGene00000408;WBGene00021973;WBGene00004027;WBGene00001161;WBGene00003948;WBGene00016381;WBGene00007924;WBGene00004241;WBGene00003917;WBGene00000837;WBGene00007010;WBGene00011720;WBGene00021710;WBGene000…	http://www.ncbi.nlm.nih.gov/pubmed/15772128
TF Targets	Rb/E2F (dpl-1, efl-1, lin-35) targets, germline	15	280	349	29469	7.28E-06	0.016696218	2.14E-04	WBGene00001686;WBGene00012020;WBGene00000392;WBGene00007892;WBGene00004374;WBGene00004027;WBGene00004241;WBGene00021658;WBGene00000867;WBGene00001607;WBGene00014117;WBGene00013189;WBGene00009701;WBGene00003184;WBGene00020684	http://www.ncbi.nlm.nih.gov/pubmed/23347407
TF Targets	Targets of eri-6/7-dependent siRNAs, adult	5	280	14	29469	7.41E-06	0.016987413	2.15E-04	WBGene00044167;WBGene00022486;WBGene00014562;WBGene00044478;WBGene00007303	http://www.ncbi.nlm.nih.gov/pubmed/22102828
Mutants	UP by lin-35 mutant (Latorre)	18	280	513	29469	9.75E-06	0.022349542	2.79E-04	WBGene00009444;WBGene00001686;WBGene00012020;WBGene00011451;WBGene00003776;WBGene00000408;WBGene00001161;WBGene00016381;WBGene00003917;WBGene00001607;WBGene00013270;WBGene00022099;WBGene00012228;WBGene00007303;WBGene00012326;WBGene00016151;WBGene00006571;WBGene00000264	http://www.ncbi.nlm.nih.gov/pubmed/25737279
Mutants	down by gld-2 RNAi	19	280	571	29469	1.05E-05	0.024045822	2.97E-04	WBGene00007485;WBGene00000465;WBGene00012020;WBGene00003989;WBGene00000480;WBGene00044213;WBGene00010734;WBGene00003926;WBGene00004241;WBGene00021658;WBGene00000770;WBGene00000867;WBGene00008733;WBGene00003130;WBGene00001607;WBGene00013270;WBGene00009701;WBGene00016702;WBGene00020684	http://www.ncbi.nlm.nih.gov/pubmed/26096734
Other	UP Space Flight	36	280	1676	29469	1.09E-05	0.025039926	3.05E-04	WBGene00000465;WBGene00001686;WBGene00022729;WBGene00000392;WBGene00021018;WBGene00015796;WBGene00022110;WBGene00022251;WBGene00000408;WBGene00017080;WBGene00010011;WBGene00004027;WBGene00008140;WBGene00004241;WBGene00012319;WBGene00011720;WBGene00012423;WBGene00000867;WBGene00001607;WBGene00014117;WBGene00015247;WBGene00004361;WBGene00009701;WBGene00018599;WBGene00007303;WBGene00045297;WBGene000…	http://www.ncbi.nlm.nih.gov/pubmed/22768380
TF Targets	PHA-4 emb Targets	52	280	2893	29469	1.12E-05	0.025722846	3.10E-04	WBGene00006384;WBGene00008517;WBGene00018491;WBGene00001119;WBGene00013638;WBGene00015819;WBGene00000207;WBGene00007892;WBGene00021018;WBGene00044586;WBGene00003989;WBGene00001976;WBGene00006062;WBGene00007709;WBGene00020902;WBGene00000368;WBGene00010484;WBGene00018075;WBGene00010057;WBGene00008446;WBGene00003776;WBGene00000408;WBGene00017080;WBGene00015488;WBGene00015658;WBGene00001161;WBGene000…	http://www.ncbi.nlm.nih.gov/pubmed/21177963
Other	germline nuclear RNAi-dependent transcriptional silencing	8	280	82	29469	1.34E-05	0.030780978	3.66E-04	WBGene00018929;WBGene00044213;WBGene00002063;WBGene00044541;WBGene00012228;WBGene00015366;WBGene00017186;WBGene00016072	http://www.ncbi.nlm.nih.gov/pubmed/25534009
Microbes	UP by S. enterica SL2048 under fer-1 mutant	21	280	699	29469	1.39E-05	0.031912809	3.75E-04	WBGene00016070;WBGene00000465;WBGene00004246;WBGene00019598;WBGene00007709;WBGene00006927;WBGene00004374;WBGene00004027;WBGene00044439;WBGene00004241;WBGene00021658;WBGene00000867;WBGene00001607;WBGene00014117;WBGene00044436;WBGene00013270;WBGene00009701;WBGene00003067;WBGene00007376;WBGene00016072;WBGene00003184	http://www.ncbi.nlm.nih.gov/pubmed/25340560
Mutants	UP by lin-35 mutant (Grishok)	18	280	528	29469	1.41E-05	0.032379166	3.77E-04	WBGene00001686;WBGene00012020;WBGene00005022;WBGene00007709;WBGene00011451;WBGene00019198;WBGene00018807;WBGene00000408;WBGene00001161;WBGene00016381;WBGene00002063;WBGene00003917;WBGene00000837;WBGene00001607;WBGene00007303;WBGene00016151;WBGene00006571;WBGene00011604	http://www.ncbi.nlm.nih.gov/pubmed/19073934
Chemicals/stress	down by hypoxia at 3h, intestinal	16	280	422	29469	1.45E-05	0.033246941	3.82E-04	WBGene00006926;WBGene00000465;WBGene00006929;WBGene00007709;WBGene00004374;WBGene00004027;WBGene00004241;WBGene00000867;WBGene00001607;WBGene00014117;WBGene00004702;WBGene00009701;WBGene00003184;WBGene00020684;WBGene00044638;WBGene00006930	https://www.ncbi.nlm.nih.gov/pubmed/28495447
Development/Dauer/Aging	Down Embryo vs. Young	30	280	1281	29469	1.53E-05	0.035055406	3.98E-04	WBGene00021019;WBGene00001119;WBGene00009444;WBGene00000465;WBGene00012020;WBGene00000480;WBGene00001976;WBGene00007709;WBGene00003884;WBGene00001161;WBGene00016381;WBGene00020451;WBGene00004241;WBGene00000867;WBGene00001607;WBGene00014117;WBGene00013270;WBGene00022099;WBGene00009701;WBGene00004700;WBGene00016151;WBGene00004312;WBGene00006571;WBGene00013307;WBGene00008441;WBGene00011604;WBGene000…	http://www.ncbi.nlm.nih.gov/pubmed/17472752
TF Targets	PHA-4 lemb Targets	59	280	3514	29469	1.79E-05	0.041029951	4.61E-04	WBGene00006384;WBGene00008517;WBGene00018491;WBGene00001119;WBGene00013638;WBGene00015819;WBGene00000207;WBGene00021884;WBGene00021018;WBGene00044586;WBGene00003989;WBGene00000480;WBGene00001976;WBGene00020902;WBGene00000368;WBGene00010484;WBGene00018075;WBGene00010057;WBGene00008446;WBGene00020115;WBGene00018807;WBGene00000408;WBGene00015488;WBGene00015658;WBGene00010011;WBGene00001161;WBGene000…	http://www.ncbi.nlm.nih.gov/pubmed/21177963
Mutants	UP by ife-1 mutant polysome	20	280	653	29469	1.82E-05	0.041715645	4.64E-04	WBGene00000465;WBGene00021884;WBGene00007709;WBGene00011451;WBGene00045272;WBGene00006927;WBGene00004374;WBGene00001161;WBGene00016381;WBGene00004241;WBGene00000867;WBGene00001607;WBGene00009701;WBGene00015492;WBGene00020630;WBGene00006571;WBGene00017186;WBGene00016702;WBGene00003184;WBGene00020684	http://www.ncbi.nlm.nih.gov/pubmed/26542024
TF Targets	gld-1 iPAR-CLIP targets	16	280	432	29469	1.90E-05	0.043675889	4.80E-04	WBGene00000465;WBGene00012020;WBGene00021884;WBGene00005022;WBGene00007709;WBGene00004374;WBGene00004027;WBGene00008140;WBGene00004241;WBGene00001607;WBGene00014117;WBGene00004702;WBGene00022037;WBGene00009701;WBGene00004312;WBGene00006930	http://www.ncbi.nlm.nih.gov/pubmed/22152485
Tissue	Down in Wt between total and muscle nuclei	34	280	1590	29469	2.25E-05	0.051594972	5.60E-04	WBGene00009444;WBGene00044502;WBGene00012020;WBGene00015819;WBGene00021884;WBGene00015796;WBGene00008007;WBGene00011451;WBGene00012374;WBGene00010734;WBGene00000408;WBGene00001161;WBGene00008140;WBGene00016381;WBGene00002063;WBGene00021658;WBGene00000770;WBGene00000867;WBGene00019094;WBGene00021606;WBGene00044436;WBGene00008405;WBGene00008131;WBGene00045297;WBGene00018013;WBGene00016151;WBGene000…	http://www.ncbi.nlm.nih.gov/pubmed/22219512
Mutants	UP by set-25 mutant (Klosin)	9	280	122	29469	2.27E-05	0.052089424	5.60E-04	WBGene00198814;WBGene00006929;WBGene00044213;WBGene00018310;WBGene00006927;WBGene00009572;WBGene00014977;WBGene00019017;WBGene00017186	https://www.ncbi.nlm.nih.gov/pubmed/28428426
TF Targets	Targets 26G-RNAs in wild type	54	280	3138	29469	2.40E-05	0.055104538	5.86E-04	WBGene00010507;WBGene00021019;WBGene00018491;WBGene00013638;WBGene00000465;WBGene00001686;WBGene00001911;WBGene00022729;WBGene00000392;WBGene00021018;WBGene00003989;WBGene00015796;WBGene00005022;WBGene00022730;WBGene00044167;WBGene00008007;WBGene00000368;WBGene00008446;WBGene00000408;WBGene00021973;WBGene00006537;WBGene00003948;WBGene00045410;WBGene00002063;WBGene00004076;WBGene00011511;WBGene000…	http://www.ncbi.nlm.nih.gov/pubmed/20133686
Mutants	Depleted in small RNA libraries from csr-1 mutant	24	280	917	29469	2.56E-05	0.058812893	6.19E-04	WBGene00016070;WBGene00013638;WBGene00000465;WBGene00009081;WBGene00022729;WBGene00019267;WBGene00000368;WBGene00045382;WBGene00010734;WBGene00004374;WBGene00006537;WBGene00044439;WBGene00045410;WBGene00020451;WBGene00011511;WBGene00011720;WBGene00001178;WBGene00015492;WBGene00016150;WBGene00016151;WBGene00010768;WBGene00006571;WBGene00003214;WBGene00000393	http://www.ncbi.nlm.nih.gov/pubmed/19804758
TF Targets	EFL-1 YA targets (Araya)	14	280	346	29469	3.06E-05	0.070125887	7.30E-04	WBGene00000465;WBGene00007709;WBGene00004374;WBGene00006537;WBGene00003948;WBGene00016381;WBGene00004241;WBGene00020038;WBGene00008131;WBGene00022037;WBGene00004361;WBGene00004312;WBGene00000264;WBGene00003184	http://www.ncbi.nlm.nih.gov/pubmed/25164749
Chemicals/stress	UP HS F3 vs. CTL F3	20	280	679	29469	3.10E-05	0.070993703	7.32E-04	WBGene00021589;WBGene00019598;WBGene00005022;WBGene00017796;WBGene00022251;WBGene00000408;WBGene00011812;WBGene00004027;WBGene00016381;WBGene00002063;WBGene00004241;WBGene00000770;WBGene00008733;WBGene00001607;WBGene00004744;WBGene00018013;WBGene00022366;WBGene00004312;WBGene00006571;WBGene00003184	http://www.ncbi.nlm.nih.gov/pubmed/20816092
Chemicals/stress	Down by mercury mid 8H	16	280	458	29469	3.73E-05	0.08548067	8.72E-04	WBGene00018491;WBGene00012018;WBGene00006926;WBGene00001686;WBGene00010204;WBGene00006929;WBGene00005022;WBGene00007709;WBGene00006927;WBGene00004374;WBGene00008140;WBGene00021658;WBGene00000867;WBGene00012326;WBGene00019017;WBGene00006930	http://www.ncbi.nlm.nih.gov/geo/query/acc.cgi?acc=GSE42592
TF Targets	SKN-1 L1 Targets	42	280	2242	29469	4.12E-05	0.094543216	9.55E-04	WBGene00006384;WBGene00008517;WBGene00018491;WBGene00013638;WBGene00015565;WBGene00015819;WBGene00000207;WBGene00003989;WBGene00000368;WBGene00018075;WBGene00008446;WBGene00000408;WBGene00015658;WBGene00006537;WBGene00001161;WBGene00003948;WBGene00003926;WBGene00007010;WBGene00010908;WBGene00011720;WBGene00004126;WBGene00001258;WBGene00020038;WBGene00013189;WBGene00004702;WBGene00022099;WBGene000…	http://www.ncbi.nlm.nih.gov/pubmed/21177963
TF Targets	fbf-1 associated	59	280	3634	29469	4.71E-05	0.108038239	0.001080382	WBGene00009444;WBGene00000465;WBGene00012020;WBGene00021884;WBGene00000392;WBGene00015796;WBGene00000480;WBGene00007709;WBGene00020902;WBGene00011451;WBGene00008446;WBGene00022251;WBGene00004374;WBGene00000408;WBGene00017080;WBGene00004027;WBGene00001161;WBGene00008140;WBGene00016381;WBGene00002063;WBGene00004241;WBGene00012319;WBGene00003917;WBGene00000837;WBGene00012423;WBGene00021658;WBGene000…	http://www.ncbi.nlm.nih.gov/pubmed/20142496
Mutants	down by drh-3 (ne4253) mutant	14	280	363	29469	5.00E-05	0.114664081	0.001135288	WBGene00000465;WBGene00018310;WBGene00004374;WBGene00004027;WBGene00004241;WBGene00000770;WBGene00021606;WBGene00009572;WBGene00004702;WBGene00009701;WBGene00045297;WBGene00000264;WBGene00016702;WBGene00020684	http://www.ncbi.nlm.nih.gov/pubmed/24681887
TF Targets	PHA-4 L1 Targets	55	280	3326	29469	5.81E-05	0.133314608	0.001307006	WBGene00006384;WBGene00008517;WBGene00018491;WBGene00001119;WBGene00015565;WBGene00012020;WBGene00000207;WBGene00021884;WBGene00007892;WBGene00044586;WBGene00005022;WBGene00006062;WBGene00020902;WBGene00000368;WBGene00010484;WBGene00018075;WBGene00019198;WBGene00010057;WBGene00008446;WBGene00000408;WBGene00017080;WBGene00015488;WBGene00015658;WBGene00006537;WBGene00001161;WBGene00003948;WBGene000…	http://www.ncbi.nlm.nih.gov/pubmed/21177963
Chemicals/stress	Down by Tannic acid 300um	28	280	1243	29469	6.15E-05	0.141004283	0.001368974	WBGene00018491;WBGene00006926;WBGene00001686;WBGene00015819;WBGene00006929;WBGene00003989;WBGene00005022;WBGene00007709;WBGene00004374;WBGene00021549;WBGene00016381;WBGene00012319;WBGene00000837;WBGene00000867;WBGene00001607;WBGene00004386;WBGene00004702;WBGene00022037;WBGene00004361;WBGene00006796;WBGene00012326;WBGene00020630;WBGene00015852;WBGene00004312;WBGene00013307;WBGene00003214;WBGene000…	http://www.ncbi.nlm.nih.gov/pubmed/22493606
Mutants	down efl-1 mutant vs. N2	10	280	182	29469	6.55E-05	0.150284906	0.001445047	WBGene00018491;WBGene00015565;WBGene00000465;WBGene00001686;WBGene00012020;WBGene00001911;WBGene00004374;WBGene00006537;WBGene00001607;WBGene00014117	http://www.ncbi.nlm.nih.gov/pubmed/17096596
TF Targets	Reduce small RNAs reads by adr-2 mutant	25	280	1064	29469	9.03E-05	0.206981323	0.001971251	WBGene00018491;WBGene00015565;WBGene00007709;WBGene00044213;WBGene00045272;WBGene00004374;WBGene00006537;WBGene00021549;WBGene00001161;WBGene00004241;WBGene00000837;WBGene00007010;WBGene00002990;WBGene00010908;WBGene00011720;WBGene00001258;WBGene00008405;WBGene00013270;WBGene00022099;WBGene00015366;WBGene00004744;WBGene00004465;WBGene00006571;WBGene00003214;WBGene00013677	http://www.ncbi.nlm.nih.gov/pubmed/22673872
Mutants	Down glp-1 (e2141ts) L3	34	280	1711	29469	9.31E-05	0.213385252	0.002013068	WBGene00009444;WBGene00000465;WBGene00019598;WBGene00022110;WBGene00008007;WBGene00007709;WBGene00011451;WBGene00010734;WBGene00004374;WBGene00000408;WBGene00004027;WBGene00001161;WBGene00008140;WBGene00016381;WBGene00002063;WBGene00004241;WBGene00003917;WBGene00021658;WBGene00000770;WBGene00000867;WBGene00001607;WBGene00014117;WBGene00004702;WBGene00022099;WBGene00009701;WBGene00045297;WBGene000…	http://www.ncbi.nlm.nih.gov/pubmed/20555324
DAF/Insulin/food	down by rapamycin	18	280	622	29469	1.08E-04	0.246573453	0.002302072	WBGene00006384;WBGene00008517;WBGene00009444;WBGene00006926;WBGene00012020;WBGene00006929;WBGene00000392;WBGene00011451;WBGene00004027;WBGene00021658;WBGene00000867;WBGene00014117;WBGene00015247;WBGene00009701;WBGene00007303;WBGene00020630;WBGene00018013;WBGene00003184	http://www.ncbi.nlm.nih.gov/pubmed/26676933
Mutants	UP unc-43 mutant	7	280	79	29469	1.08E-04	0.248623793	0.002302072	WBGene00006926;WBGene00006929;WBGene00007709;WBGene00006927;WBGene00004241;WBGene00001607;WBGene00006930	http://www.ncbi.nlm.nih.gov/pubmed/16103915
Mutants	Down pie-1; pal-1(RNAi) mutant 122 min after 4 cell stage	18	280	627	29469	1.18E-04	0.271318548	0.002489161	WBGene00000465;WBGene00001686;WBGene00012020;WBGene00003989;WBGene00019538;WBGene00007709;WBGene00017796;WBGene00006537;WBGene00001161;WBGene00007924;WBGene00004126;WBGene00004702;WBGene00022099;WBGene00018013;WBGene00001520;WBGene00020684;WBGene00000463;WBGene00006930	http://www.ncbi.nlm.nih.gov/pubmed/15772128
Chemicals/stress	Regulated by temperature	36	280	1892	29469	1.28E-04	0.292360784	0.002657825	WBGene00010507;WBGene00009444;WBGene00000465;WBGene00012020;WBGene00001911;WBGene00021884;WBGene00000392;WBGene00004246;WBGene00015796;WBGene00007709;WBGene00006927;WBGene00020115;WBGene00004374;WBGene00004027;WBGene00007924;WBGene00004241;WBGene00000837;WBGene00000770;WBGene00000867;WBGene00001607;WBGene00014117;WBGene00008131;WBGene00004702;WBGene00009701;WBGene00018599;WBGene00015492;WBGene000…	http://www.ncbi.nlm.nih.gov/pubmed/21931806
TF Targets	DPL-1 YA targets (Araya)	10	280	201	29469	1.40E-04	0.320349433	0.002886031	WBGene00000465;WBGene00007709;WBGene00006537;WBGene00004027;WBGene00016381;WBGene00020038;WBGene00004361;WBGene00004312;WBGene00000264;WBGene00003184	http://www.ncbi.nlm.nih.gov/pubmed/25164749
TF Targets	germline, enriched by MBP::PUF-8	9	280	158	29469	1.42E-04	0.324550432	0.002897772	WBGene00003235;WBGene00012020;WBGene00001911;WBGene00003989;WBGene00007709;WBGene00004241;WBGene00009701;WBGene00018599;WBGene00003184	http://www.ncbi.nlm.nih.gov/pubmed/21968099
Mutants	down by emr-1(gk119) mutant	13	280	353	29469	1.58E-04	0.361934486	0.00320296	WBGene00000465;WBGene00001686;WBGene00012020;WBGene00007709;WBGene00006927;WBGene00004374;WBGene00004027;WBGene00004241;WBGene00001258;WBGene00001607;WBGene00020630;WBGene00018013;WBGene00012674	http://www.ncbi.nlm.nih.gov/pubmed/24490688
Mutants	prg-1 regulated	19	280	708	29469	1.66E-04	0.381489566	0.0033464	WBGene00015819;WBGene00001911;WBGene00021884;WBGene00007892;WBGene00021018;WBGene00044586;WBGene00022730;WBGene00044413;WBGene00020902;WBGene00045382;WBGene00044213;WBGene00010734;WBGene00020451;WBGene00044436;WBGene00013768;WBGene00009161;WBGene00010768;WBGene00003214;WBGene00012577	http://www.ncbi.nlm.nih.gov/pubmed/24696457
Chemicals/stress	Down 25c CB4856 vs. N2	9	280	163	29469	1.75E-04	0.402070538	0.003496266	WBGene00021019;WBGene00007892;WBGene00005022;WBGene00044167;WBGene00015488;WBGene00007924;WBGene00001178;WBGene00000514;WBGene00003130	http://www.ncbi.nlm.nih.gov/pubmed/22669615
Development/Dauer/Aging	Z2 and Z3 enriched genes	23	280	976	29469	1.80E-04	0.411777781	0.003549808	WBGene00000465;WBGene00012020;WBGene00015819;WBGene00019598;WBGene00007709;WBGene00044213;WBGene00004027;WBGene00002063;WBGene00003926;WBGene00004241;WBGene00019433;WBGene00012423;WBGene00000770;WBGene00000867;WBGene00001607;WBGene00013270;WBGene00009701;WBGene00016150;WBGene00015852;WBGene00003214;WBGene00016702;WBGene00003184;WBGene00020684	http://www.ncbi.nlm.nih.gov/pubmed/21177967
Mutants	down by prp-8:prp-6:prp-31 RNAi on glp-4 mutant	7	280	88	29469	1.97E-04	0.451417038	0.003858265	WBGene00012020;WBGene00007709;WBGene00004374;WBGene00004241;WBGene00000867;WBGene00001607;WBGene00003184	http://www.ncbi.nlm.nih.gov/pubmed/26490224
TF Targets	fog-2 associated	19	280	720	29469	2.04E-04	0.468147928	0.003967355	WBGene00000465;WBGene00012020;WBGene00021884;WBGene00004246;WBGene00007709;WBGene00004374;WBGene00004027;WBGene00004241;WBGene00012423;WBGene00021658;WBGene00000770;WBGene00000867;WBGene00001607;WBGene00008131;WBGene00009701;WBGene00018013;WBGene00003067;WBGene00003184;WBGene00020684	http://www.ncbi.nlm.nih.gov/pubmed/26564160
Microbes	Down Bacillus strain 67	12	280	313	29469	2.22E-04	0.508958102	0.004276959	WBGene00000465;WBGene00006929;WBGene00007709;WBGene00045272;WBGene00006927;WBGene00004374;WBGene00044439;WBGene00003926;WBGene00004702;WBGene00022099;WBGene00003214;WBGene00044638	http://www.ncbi.nlm.nih.gov/pubmed/23028509
Mutants	UP wdr-5 mutant Day1	50	280	3087	29469	2.34E-04	0.53592896	0.004435424	WBGene00001119;WBGene00009444;WBGene00006926;WBGene00000465;WBGene00001686;WBGene00012020;WBGene00001911;WBGene00006929;WBGene00003989;WBGene00015796;WBGene00000480;WBGene00022110;WBGene00008007;WBGene00007709;WBGene00011451;WBGene00006927;WBGene00004374;WBGene00000408;WBGene00017080;WBGene00011812;WBGene00004027;WBGene00001161;WBGene00003948;WBGene00008140;WBGene00016381;WBGene00002063;WBGene000…	http://www.ncbi.nlm.nih.gov/pubmed/22012258
Chemicals/stress	UP by 0.1mM paraquat	52	280	3256	29469	2.35E-04	0.539251138	0.004435424	WBGene00000465;WBGene00001686;WBGene00012020;WBGene00003989;WBGene00005022;WBGene00001976;WBGene00006062;WBGene00019267;WBGene00007709;WBGene00011451;WBGene00004374;WBGene00000408;WBGene00004027;WBGene00021549;WBGene00001161;WBGene00008140;WBGene00004241;WBGene00012319;WBGene00003917;WBGene00000837;WBGene00007010;WBGene00002990;WBGene00011720;WBGene00012423;WBGene00021658;WBGene00004126;WBGene000…	http://www.ncbi.nlm.nih.gov/pubmed/24813612
TF Targets	PHA-4 L2 Targets	45	280	2674	29469	2.36E-04	0.541121668	0.004435424	WBGene00006384;WBGene00008517;WBGene00018491;WBGene00001119;WBGene00015565;WBGene00000207;WBGene00010204;WBGene00007892;WBGene00044586;WBGene00007709;WBGene00000368;WBGene00010484;WBGene00018075;WBGene00000408;WBGene00017080;WBGene00015488;WBGene00015658;WBGene00001161;WBGene00003948;WBGene00007924;WBGene00011511;WBGene00003926;WBGene00012319;WBGene00010908;WBGene00011720;WBGene00004126;WBGene000…	http://www.ncbi.nlm.nih.gov/pubmed/21177963
Mutants	down by glp-1 mutant (Boyd)	37	280	2037	29469	2.47E-04	0.565260688	0.004595615	WBGene00009444;WBGene00000465;WBGene00001686;WBGene00012020;WBGene00022729;WBGene00005022;WBGene00007709;WBGene00011451;WBGene00010734;WBGene00004374;WBGene00000408;WBGene00004027;WBGene00001161;WBGene00008140;WBGene00016381;WBGene00002063;WBGene00004241;WBGene00012319;WBGene00003917;WBGene00000770;WBGene00000867;WBGene00001607;WBGene00014117;WBGene00008131;WBGene00004386;WBGene00004702;WBGene000…	http://www.ncbi.nlm.nih.gov/pubmed/19879883
Mutants	Down pie-1 mutant 41 min after 4 cell stage	15	280	487	29469	2.61E-04	0.598816149	0.004829162	WBGene00018491;WBGene00009444;WBGene00012020;WBGene00001911;WBGene00003776;WBGene00004374;WBGene00004027;WBGene00007924;WBGene00003917;WBGene00012423;WBGene00015366;WBGene00020630;WBGene00013768;WBGene00018013;WBGene00001520	http://www.ncbi.nlm.nih.gov/pubmed/15772128
Other	WAGO loci with piRNA target sites that maintain 22G-RNA levels in a prg-1 mutant	7	280	93	29469	2.66E-04	0.610336228	0.004857912	WBGene00001911;WBGene00022730;WBGene00044413;WBGene00022486;WBGene00021606;WBGene00009572;WBGene00012577	http://www.ncbi.nlm.nih.gov/pubmed/22738724
Mutants	Down gld-1 mutant, polysomal	14	280	430	29469	2.67E-04	0.612096851	0.004857912	WBGene00000465;WBGene00012020;WBGene00005022;WBGene00001976;WBGene00007709;WBGene00004374;WBGene00004241;WBGene00001607;WBGene00014117;WBGene00022037;WBGene00009701;WBGene00006796;WBGene00020684;WBGene00000463	http://www.ncbi.nlm.nih.gov/pubmed/22693456
DAF/Insulin/food	UP by daf-16 mutant, Monosomal seq	13	280	375	29469	2.74E-04	0.629341433	0.004955444	WBGene00006926;WBGene00001686;WBGene00015819;WBGene00006929;WBGene00004246;WBGene00007709;WBGene00006927;WBGene00004374;WBGene00004241;WBGene00000867;WBGene00021522;WBGene00014117;WBGene00019017	http://www.ncbi.nlm.nih.gov/pubmed/25600869
Mutants	down at the Ribosome-protected fragment (RPF) level in the cey-1 & cey-4 mutants	6	280	61	29469	2.88E-04	0.659983478	0.005151216	WBGene00000465;WBGene00004374;WBGene00004027;WBGene00000867;WBGene00014117;WBGene00003184	http://www.ncbi.nlm.nih.gov/pubmed/25378320
Mutants	UP by nhr-62 mutant under eat-2 mutant	12	280	323	29469	2.90E-04	0.665717533	0.005151216	WBGene00012018;WBGene00015565;WBGene00000465;WBGene00010204;WBGene00006929;WBGene00006927;WBGene00004374;WBGene00004241;WBGene00001607;WBGene00022037;WBGene00019017;WBGene00003214	http://www.ncbi.nlm.nih.gov/pubmed/23935515
TF Targets	Enriched in gld-1 IP vs. myc	31	280	1592	29469	2.92E-04	0.669658085	0.005151216	WBGene00000465;WBGene00012020;WBGene00000480;WBGene00005022;WBGene00007709;WBGene00008446;WBGene00022251;WBGene00004374;WBGene00000408;WBGene00004027;WBGene00008140;WBGene00007924;WBGene00004241;WBGene00012423;WBGene00021658;WBGene00000770;WBGene00000867;WBGene00008733;WBGene00001607;WBGene00014117;WBGene00008131;WBGene00004702;WBGene00022037;WBGene00009701;WBGene00013603;WBGene00018013;WBGene000…	http://www.ncbi.nlm.nih.gov/pubmed/22693456
Mutants	UP mes-4 mutant (SS0803)	7	280	96	29469	3.16E-04	0.724916159	0.005533711	WBGene00015565;WBGene00000207;WBGene00018310;WBGene00007303;WBGene00015492;WBGene00020630;WBGene00001520	http://www.ncbi.nlm.nih.gov/pubmed/23103171
Chemicals/stress	Changed by arsenic	9	280	179	29469	3.31E-04	0.758648848	0.005743518	WBGene00000465;WBGene00006929;WBGene00007709;WBGene00006927;WBGene00004374;WBGene00000867;WBGene00001607;WBGene00003214;WBGene00006930	http://www.ncbi.nlm.nih.gov/pubmed/23894281
Other	worm fly orthologs	57	280	3733	29469	3.33E-04	0.763887853	0.005743518	WBGene00018491;WBGene00000207;WBGene00006929;WBGene00000392;WBGene00000480;WBGene00005022;WBGene00006062;WBGene00020902;WBGene00011451;WBGene00000368;WBGene00010484;WBGene00018075;WBGene00020115;WBGene00003776;WBGene00000408;WBGene00021973;WBGene00017080;WBGene00015658;WBGene00001161;WBGene00003948;WBGene00008140;WBGene00004076;WBGene00007924;WBGene00011511;WBGene00003926;WBGene00000837;WBGene000…	http://www.ncbi.nlm.nih.gov/pubmed/14730301
TF Targets	LIN-39 L3 Targets	20	280	818	29469	3.43E-04	0.786461995	0.005869119	WBGene00018491;WBGene00001976;WBGene00010484;WBGene00001161;WBGene00012319;WBGene00010908;WBGene00004126;WBGene00001258;WBGene00004702;WBGene00022037;WBGene00004361;WBGene00006796;WBGene00016150;WBGene00020146;WBGene00013603;WBGene00004465;WBGene00004700;WBGene00016151;WBGene00021507;WBGene00008339	http://www.ncbi.nlm.nih.gov/pubmed/21177963
Development/Dauer/Aging	down in dauer vs. mix stage	5	280	36	29469	3.70E-04	0.848028055	0.006281689	WBGene00006926;WBGene00006929;WBGene00006927;WBGene00004241;WBGene00006930	http://www.ncbi.nlm.nih.gov/pubmed/15837805
TF Targets	GLD-1 and CGH-1 Co-regulated genes	7	280	100	29469	3.94E-04	0.903171603	0.006592493	WBGene00012020;WBGene00007709;WBGene00004374;WBGene00004241;WBGene00014117;WBGene00022037;WBGene00009701	http://www.ncbi.nlm.nih.gov/pubmed/22693456
Other	stabilized by gld-1	7	280	100	29469	3.94E-04	0.903171603	0.006592493	WBGene00012020;WBGene00007709;WBGene00004374;WBGene00004241;WBGene00014117;WBGene00022037;WBGene00009701	http://www.ncbi.nlm.nih.gov/pubmed/22693456
TF Targets	Putative E2F-targets	14	280	450	29469	4.11E-04	0.942795674	0.006831853	WBGene00001686;WBGene00005022;WBGene00022730;WBGene00007709;WBGene00019198;WBGene00001161;WBGene00000514;WBGene00000770;WBGene00001607;WBGene00022099;WBGene00016151;WBGene00021507;WBGene00006571;WBGene00000264	http://www.ncbi.nlm.nih.gov/pubmed/17368442
Mutants	Down ash-2 RNAi L3	9	280	187	29469	4.43E-04	1	0.007258231	WBGene00015565;WBGene00006926;WBGene00000465;WBGene00006929;WBGene00000480;WBGene00006927;WBGene00004374;WBGene00012228;WBGene00006930	http://www.ncbi.nlm.nih.gov/pubmed/20555324
DAF/Insulin/food	UP by daf-16 mutant, Polysomal seq	11	280	286	29469	4.43E-04	1	0.007258231	WBGene00006926;WBGene00000465;WBGene00001686;WBGene00006929;WBGene00007709;WBGene00006927;WBGene00004374;WBGene00004241;WBGene00001607;WBGene00020684;WBGene00044638	http://www.ncbi.nlm.nih.gov/pubmed/25600869
Microbes	Common between C. elegans and P. pacificus to X. Nematophila	35	280	1948	29469	4.63E-04	1	0.007532624	WBGene00018491;WBGene00012018;WBGene00015565;WBGene00003235;WBGene00009081;WBGene00000207;WBGene00000392;WBGene00015796;WBGene00005022;WBGene00020115;WBGene00004374;WBGene00001161;WBGene00003948;WBGene00016381;WBGene00004076;WBGene00003926;WBGene00019433;WBGene00001178;WBGene00008733;WBGene00001258;WBGene00020038;WBGene00022037;WBGene00004361;WBGene00009701;WBGene00018599;WBGene00020146;WBGene000…	http://www.ncbi.nlm.nih.gov/pubmed/23028509
Other	Constitutiely expressed genes in evironment interaction	45	280	2761	29469	4.68E-04	1	0.007562918	WBGene00009444;WBGene00015565;WBGene00000465;WBGene00012020;WBGene00000207;WBGene00000392;WBGene00003989;WBGene00000480;WBGene00007709;WBGene00011451;WBGene00018075;WBGene00020115;WBGene00022251;WBGene00000408;WBGene00006537;WBGene00004027;WBGene00001161;WBGene00003948;WBGene00016381;WBGene00011511;WBGene00003926;WBGene00004241;WBGene00019433;WBGene00011720;WBGene00021658;WBGene00004126;WBGene000…	http://www.ncbi.nlm.nih.gov/pubmed/22669615
Mutants	down by cco-1 RNAi (Merkwirth)	27	280	1342	29469	4.97E-04	1	0.007970102	WBGene00077728;WBGene00001119;WBGene00003235;WBGene00001911;WBGene00003989;WBGene00022730;WBGene00044413;WBGene00010484;WBGene00044213;WBGene00045272;WBGene00006927;WBGene00008446;WBGene00010734;WBGene00000408;WBGene00022486;WBGene00003926;WBGene00012319;WBGene00003917;WBGene00004702;WBGene00022099;WBGene00007303;WBGene00004700;WBGene00012693;WBGene00017999;WBGene00003214;WBGene00013677;WBGene000…	http://www.ncbi.nlm.nih.gov/pubmed/27133168
Mutants	down by csr-1 hypomorphic mutant	12	280	349	29469	5.56E-04	1	0.008846667	WBGene00000465;WBGene00009081;WBGene00019598;WBGene00005022;WBGene00007709;WBGene00004374;WBGene00019094;WBGene00009701;WBGene00020146;WBGene00017999;WBGene00003184;WBGene00020684	http://www.ncbi.nlm.nih.gov/pubmed/24681887
Mutants	UP by Notch pathway	7	280	108	29469	5.94E-04	1	0.009387597	WBGene00000207;WBGene00008007;WBGene00001607;WBGene00009572;WBGene00015492;WBGene00014259;WBGene00001520	https://www.ncbi.nlm.nih.gov/pubmed/27602485
DAF/Insulin/food	down in abundance at day 1 by daf-16 mutant, proteomics	6	280	75	29469	7.50E-04	1	0.011773149	WBGene00006926;WBGene00012020;WBGene00006929;WBGene00006927;WBGene00003776;WBGene00006930	http://www.ncbi.nlm.nih.gov/pubmed/25957690
TF Targets	gld-1 associated	19	280	805	29469	7.59E-04	1	0.011839568	WBGene00000465;WBGene00012020;WBGene00005022;WBGene00007709;WBGene00008446;WBGene00004374;WBGene00004027;WBGene00008140;WBGene00004241;WBGene00021658;WBGene00000867;WBGene00001607;WBGene00014117;WBGene00022037;WBGene00004361;WBGene00009701;WBGene00004312;WBGene00019017;WBGene00003184	http://www.ncbi.nlm.nih.gov/pubmed/21169991
Mutants	UP by aak-2 mutant (Burkewitz)	14	280	492	29469	9.38E-04	1	0.014525434	WBGene00000465;WBGene00012020;WBGene00010204;WBGene00007709;WBGene00004374;WBGene00004027;WBGene00004241;WBGene00000867;WBGene00001607;WBGene00014117;WBGene00022037;WBGene00009701;WBGene00003184;WBGene00020684	http://www.ncbi.nlm.nih.gov/pubmed/25723162
Mutants	down by cgh-1 RNAi	11	280	316	29469	9.53E-04	1	0.014666557	WBGene00001976;WBGene00007709;WBGene00016381;WBGene00004241;WBGene00021658;WBGene00000867;WBGene00001607;WBGene00014117;WBGene00022037;WBGene00003184;WBGene00000463	http://www.ncbi.nlm.nih.gov/pubmed/22693456
Mutants	UP by isp-1 mutant (Cristina)	17	280	689	29469	1.00E-03	1	0.015281486	WBGene00000685;WBGene00006926;WBGene00000465;WBGene00000207;WBGene00010204;WBGene00019789;WBGene00011451;WBGene00022251;WBGene00004374;WBGene00021658;WBGene00000514;WBGene00008733;WBGene00014117;WBGene00009572;WBGene00007303;WBGene00012693;WBGene00008441	http://www.ncbi.nlm.nih.gov/pubmed/19360127
Mutants	UP ifg-1 inhibited	5	280	47	29469	0.001031872	1	0.015669413	WBGene00018491;WBGene00006926;WBGene00006929;WBGene00006927;WBGene00006930	http://www.ncbi.nlm.nih.gov/pubmed/21723504
Microbes	down by B. thuringiensis (BT247), 12h	25	280	1262	29469	0.001052752	1	0.015881311	WBGene00018491;WBGene00015565;WBGene00001686;WBGene00012020;WBGene00010204;WBGene00006929;WBGene00004246;WBGene00003989;WBGene00007709;WBGene00045272;WBGene00006927;WBGene00020115;WBGene00011812;WBGene00003948;WBGene00004241;WBGene00003917;WBGene00001607;WBGene00014117;WBGene00012326;WBGene00018013;WBGene00004312;WBGene00019017;WBGene00001520;WBGene00003184;WBGene00044638	http://www.ncbi.nlm.nih.gov/pubmed/27066825
Mutants	UP by lin-35(n745), starved L1	17	280	694	29469	0.00107742	1	0.016147218	WBGene00001686;WBGene00000480;WBGene00020902;WBGene00011451;WBGene00019198;WBGene00001161;WBGene00016381;WBGene00003917;WBGene00007010;WBGene00000770;WBGene00001607;WBGene00013189;WBGene00022099;WBGene00007303;WBGene00016151;WBGene00006571;WBGene00000264	http://www.ncbi.nlm.nih.gov/pubmed/23664972
Microbes	UP S. marcescens 24h, cDNAArray	8	280	166	29469	0.00109011	1	0.016231317	WBGene00018491;WBGene00000685;WBGene00010204;WBGene00004374;WBGene00004241;WBGene00022037;WBGene00012731;WBGene00019017	http://www.ncbi.nlm.nih.gov/pubmed/21602919
Mutants	UP by crtc-1 and aak-2 mutant (Burkewitz)	17	280	698	29469	0.001143265	1	0.016818238	WBGene00000465;WBGene00009081;WBGene00012020;WBGene00010204;WBGene00007709;WBGene00004374;WBGene00004027;WBGene00004241;WBGene00007010;WBGene00000867;WBGene00001607;WBGene00014117;WBGene00022037;WBGene00009701;WBGene00016150;WBGene00003184;WBGene00020684	http://www.ncbi.nlm.nih.gov/pubmed/25723162
Development/Dauer/Aging	UP in abundance day 22 vs. day 1, proteomics	14	280	503	29469	0.001144198	1	0.016818238	WBGene00006926;WBGene00001686;WBGene00012020;WBGene00006929;WBGene00003989;WBGene00000480;WBGene00005022;WBGene00006927;WBGene00003776;WBGene00004241;WBGene00007010;WBGene00016151;WBGene00006571;WBGene00006930	http://www.ncbi.nlm.nih.gov/pubmed/25957690
Chemicals/stress	UP by Anatase Bulk	17	280	699	29469	0.001160249	1	0.016945551	WBGene00077437;WBGene00018491;WBGene00010204;WBGene00021018;WBGene00044413;WBGene00020902;WBGene00044213;WBGene00045272;WBGene00004076;WBGene00001459;WBGene00045168;WBGene00044478;WBGene00007303;WBGene00020146;WBGene00045297;WBGene00012731;WBGene00017186	http://www.ncbi.nlm.nih.gov/pubmed/25211548
Mutants	UP by isp-1 mutant	32	280	1814	29469	0.001167765	1	0.016947381	WBGene00001119;WBGene00003235;WBGene00012020;WBGene00021884;WBGene00000392;WBGene00019598;WBGene00019789;WBGene00001976;WBGene00007709;WBGene00018075;WBGene00018310;WBGene00000408;WBGene00015488;WBGene00002063;WBGene00004241;WBGene00012319;WBGene00012423;WBGene00021658;WBGene00004126;WBGene00001178;WBGene00001459;WBGene00021606;WBGene00014117;WBGene00009572;WBGene00007303;WBGene00016150;WBGene000…	http://www.ncbi.nlm.nih.gov/pubmed/24813612
Development/Dauer/Aging	UP in abundance day 22 vs. day 1 under daf-2 mutant, proteomics	13	280	446	29469	0.001252972	1	0.018060301	WBGene00006926;WBGene00001686;WBGene00012020;WBGene00006929;WBGene00003989;WBGene00000480;WBGene00006927;WBGene00003776;WBGene00018013;WBGene00004465;WBGene00016151;WBGene00006571;WBGene00006930	http://www.ncbi.nlm.nih.gov/pubmed/25957690
DAF/Insulin/food	UP by daf-2 mutant, Polysomal seq	11	280	328	29469	0.001260204	1	0.018060301	WBGene00006926;WBGene00000465;WBGene00001686;WBGene00006929;WBGene00007709;WBGene00006927;WBGene00004374;WBGene00004241;WBGene00001607;WBGene00020684;WBGene00044638	http://www.ncbi.nlm.nih.gov/pubmed/25600869
Mutants	Down pie-1 mutant 186 min after 4 cell stage	12	280	390	29469	0.001365732	1	0.019451079	WBGene00018491;WBGene00012018;WBGene00013638;WBGene00001686;WBGene00012020;WBGene00007709;WBGene00021549;WBGene00019433;WBGene00004702;WBGene00020146;WBGene00018013;WBGene00000463	http://www.ncbi.nlm.nih.gov/pubmed/15772128
DAF/Insulin/food	down in abundance at day 22 by daf-2 mutant, proteomics	7	280	128	29469	0.001437633	1	0.020348718	WBGene00006926;WBGene00006929;WBGene00001976;WBGene00020902;WBGene00006927;WBGene00004241;WBGene00006930	http://www.ncbi.nlm.nih.gov/pubmed/25957690
Microbes	UP infection CB4856 vs. N2	6	280	87	29469	0.001463466	1	0.020587284	WBGene00022020;WBGene00020902;WBGene00018202;WBGene00010011;WBGene00044436;WBGene00022385	http://www.ncbi.nlm.nih.gov/pubmed/22669615
Tissue	enriched by CYE-1/CDK-4 expession Muscle	12	280	394	29469	0.001480447	1	0.020699173	WBGene00009444;WBGene00003989;WBGene00011451;WBGene00008446;WBGene00016381;WBGene00003917;WBGene00001607;WBGene00016524;WBGene00022099;WBGene00007303;WBGene00016151;WBGene00006571	http://www.ncbi.nlm.nih.gov/pubmed/22102824
Other	SL2-Enriched total	65	280	4707	29469	0.001597029	1	0.022086981	WBGene00010507;WBGene00018491;WBGene00012018;WBGene00015565;WBGene00006926;WBGene00000465;WBGene00012020;WBGene00015819;WBGene00000207;WBGene00001911;WBGene00010204;WBGene00006929;WBGene00000392;WBGene00021018;WBGene00021148;WBGene00001976;WBGene00006062;WBGene00007709;WBGene00000368;WBGene00010484;WBGene00018075;WBGene00008446;WBGene00018807;WBGene00003776;WBGene00004374;WBGene00006537;WBGene000…	http://www.ncbi.nlm.nih.gov/pubmed/12075352
Mutants	UP cgh-1 mutant	10	280	282	29469	0.00159897	1	0.022086981	WBGene00006926;WBGene00006929;WBGene00019598;WBGene00006927;WBGene00007303;WBGene00015492;WBGene00014259;WBGene00020630;WBGene00001520;WBGene00006930	http://www.ncbi.nlm.nih.gov/pubmed/22693456
Mutants	down by osm-9 (King)	21	280	1008	29469	0.001671663	1	0.022951251	WBGene00044728;WBGene00021461;WBGene00021884;WBGene00000480;WBGene00022110;WBGene00006062;WBGene00011451;WBGene00000368;WBGene00003884;WBGene00019198;WBGene00015658;WBGene00010011;WBGene00002063;WBGene00002990;WBGene00044478;WBGene00012326;WBGene00014259;WBGene00020630;WBGene00012898;WBGene00017186;WBGene00000463	https://www.ncbi.nlm.nih.gov/pubmed/27111894
Mutants	down hif-1; vhl-1 vs. hif-1	8	280	179	29469	0.001681557	1	0.022951251	WBGene00006926;WBGene00016381;WBGene00007010;WBGene00009572;WBGene00012326;WBGene00003184;WBGene00020684;WBGene00006930	http://www.ncbi.nlm.nih.gov/pubmed/15361934
Other	UP by hermaphrodite young Adult	8	280	180	29469	0.0017357	1	0.023550063	WBGene00006926;WBGene00000465;WBGene00012020;WBGene00007709;WBGene00004374;WBGene00004241;WBGene00014117;WBGene00006930	http://www.ncbi.nlm.nih.gov/pubmed/26641248
Mutants	UP by egl-9 mutant (Albores)	9	280	232	29469	0.001779557	1	0.024003087	WBGene00001119;WBGene00012018;WBGene00009081;WBGene00003776;WBGene00004374;WBGene00000408;WBGene00011511;WBGene00001178;WBGene00006796	http://www.biorxiv.org/content/early/2017/03/02/112920.1
Other	Change with siRNA reads, coding region, 5'UTR	6	280	92	29469	0.001874476	1	0.025135519	WBGene00008517;WBGene00021884;WBGene00021018;WBGene00044586;WBGene00022730;WBGene00013307	http://www.ncbi.nlm.nih.gov/pubmed/23329696
Other	genes that have an overlapping or nearby (+/- 1 KB) GNUMAP +Repeat editing-enriched regions (EER)	10	280	290	29469	0.001933906	1	0.025781659	WBGene00006926;WBGene00006929;WBGene00017080;WBGene00002063;WBGene00012423;WBGene00001258;WBGene00012228;WBGene00021507;WBGene00022366;WBGene00006930	http://www.ncbi.nlm.nih.gov/pubmed/25805852
Chemicals/stress	UP high pH CB4856 vs. N2	11	280	348	29469	0.001948344	1	0.025823998	WBGene00000685;WBGene00020902;WBGene00018202;WBGene00017080;WBGene00002063;WBGene00012423;WBGene00044436;WBGene00020146;WBGene00017186;WBGene00016702;WBGene00022385	http://www.ncbi.nlm.nih.gov/pubmed/22669615
TF Targets	Targets of the human and C. elegans pocket proteins	6	280	93	29469	0.001965857	1	0.025906379	WBGene00005022;WBGene00001161;WBGene00004312;WBGene00006571;WBGene00000264;WBGene00003214	http://www.ncbi.nlm.nih.gov/pubmed/17368442
Chemicals/stress	UP by Rutile Nano	16	280	670	29469	0.002030587	1	0.02646343	WBGene00018491;WBGene00009081;WBGene00021018;WBGene00020902;WBGene00044213;WBGene00045272;WBGene00004076;WBGene00001459;WBGene00045168;WBGene00000177;WBGene00007303;WBGene00020146;WBGene00045297;WBGene00012452;WBGene00017186;WBGene00044638	http://www.ncbi.nlm.nih.gov/pubmed/25211548
Mutants	Down pie-1; pal-1(RNAi) mutant 101 min after 4 cell stage	11	280	350	29469	0.00203121	1	0.02646343	WBGene00000465;WBGene00012020;WBGene00001911;WBGene00003989;WBGene00000480;WBGene00004027;WBGene00007924;WBGene00004241;WBGene00014117;WBGene00016524;WBGene00020684	http://www.ncbi.nlm.nih.gov/pubmed/15772128
TF Targets	zfp-1 targets	40	280	2548	29469	0.002104875	1	0.02726824	WBGene00006384;WBGene00010507;WBGene00077558;WBGene00021019;WBGene00013638;WBGene00015565;WBGene00000207;WBGene00001911;WBGene00010204;WBGene00003989;WBGene00000480;WBGene00001976;WBGene00006062;WBGene00000368;WBGene00008446;WBGene00000408;WBGene00015488;WBGene00015658;WBGene00006537;WBGene00010011;WBGene00001161;WBGene00007924;WBGene00011511;WBGene00003926;WBGene00012319;WBGene00020770;WBGene000…	http://www.ncbi.nlm.nih.gov/pubmed/23806335
Mutants	Up transgenic aex-3::his-SUMO-1	11	280	354	29469	0.002205472	1	0.028410946	WBGene00012020;WBGene00022729;WBGene00017796;WBGene00004374;WBGene00000408;WBGene00000867;WBGene00001607;WBGene00004702;WBGene00009701;WBGene00017186;WBGene00020684	http://www.ncbi.nlm.nih.gov/pubmed/21253676
Chemicals/stress	down by temperature shift (25to20)	8	280	189	29469	0.002286251	1	0.029287002	WBGene00044502;WBGene00007892;WBGene00019789;WBGene00044413;WBGene00001178;WBGene00017186;WBGene00012577;WBGene00044638	https://www.ncbi.nlm.nih.gov/pubmed/28428426
Mutants	UP by crtc-1 mutant	14	280	545	29469	0.002315084	1	0.029491598	WBGene00000465;WBGene00009081;WBGene00012020;WBGene00010204;WBGene00007709;WBGene00008446;WBGene00004374;WBGene00004241;WBGene00000867;WBGene00001607;WBGene00014117;WBGene00009701;WBGene00016150;WBGene00003184	http://www.ncbi.nlm.nih.gov/pubmed/25723162
DAF/Insulin/food	UP by daf-16 starvation L1	25	280	1343	29469	0.002388046	1	0.030252974	WBGene00077437;WBGene00077728;WBGene00044728;WBGene00001686;WBGene00012020;WBGene00045289;WBGene00004246;WBGene00021018;WBGene00044586;WBGene00019598;WBGene00022730;WBGene00044167;WBGene00010484;WBGene00009310;WBGene00008446;WBGene00194981;WBGene00044439;WBGene00002990;WBGene00021658;WBGene00014977;WBGene00044478;WBGene00014259;WBGene00012693;WBGene00019017;WBGene00044638	http://www.ncbi.nlm.nih.gov/pubmed/26656736
Chemicals/stress	down by Au nanoparticles	14	280	550	29469	0.002503972	1	0.031547295	WBGene00018491;WBGene00000465;WBGene00006929;WBGene00000480;WBGene00004076;WBGene00003917;WBGene00002990;WBGene00003130;WBGene00022037;WBGene00006796;WBGene00012326;WBGene00006571;WBGene00013307;WBGene00019017	http://www.ncbi.nlm.nih.gov/pubmed/22372763
Other	SUMO Candidates	9	280	246	29469	0.002558032	1	0.03203111	WBGene00018491;WBGene00006926;WBGene00000207;WBGene00006929;WBGene00006927;WBGene00006537;WBGene00010908;WBGene00003214;WBGene00006930	http://www.ncbi.nlm.nih.gov/pubmed/19922876
Mutants	UP kgb-1 mutant vs. wt by fast	8	280	193	29469	0.002570311	1	0.03203111	WBGene00012020;WBGene00044586;WBGene00006537;WBGene00011812;WBGene00004027;WBGene00000867;WBGene00014117;WBGene00020684	http://www.ncbi.nlm.nih.gov/pubmed/23352664
Mutants	Down pie-1 mutant 101 min after 4 cell stage	20	280	974	29469	0.002616343	1	0.032329357	WBGene00018491;WBGene00009444;WBGene00015565;WBGene00012020;WBGene00001911;WBGene00003989;WBGene00008007;WBGene00000408;WBGene00004027;WBGene00003948;WBGene00004241;WBGene00019433;WBGene00021658;WBGene00022099;WBGene00009701;WBGene00012326;WBGene00004700;WBGene00001520;WBGene00020684;WBGene00006930	http://www.ncbi.nlm.nih.gov/pubmed/15772128
TF Targets	oma-1 RNP-associated proteins	9	280	247	29469	0.002622442	1	0.032329357	WBGene00006926;WBGene00000207;WBGene00006929;WBGene00003989;WBGene00006927;WBGene00006537;WBGene00004241;WBGene00010908;WBGene00006930	http://www.ncbi.nlm.nih.gov/pubmed/25261697
Chemicals/stress	Down by hemin 500 um vs. 4um	8	280	195	29469	0.002722141	1	0.033378983	WBGene00006926;WBGene00007709;WBGene00011451;WBGene00004241;WBGene00021658;WBGene00014117;WBGene00009701;WBGene00006930	http://www.ncbi.nlm.nih.gov/pubmed/18418376
Development/Dauer/Aging	down by vitamin D3 at protein level during aging	6	280	101	29469	0.002818148	1	0.034372405	WBGene00018491;WBGene00006926;WBGene00006929;WBGene00006927;WBGene00006537;WBGene00006930	https://www.ncbi.nlm.nih.gov/pubmed/27783938
Tissue	P1 cell class (from zygote)	8	280	198	29469	0.002962683	1	0.035944087	WBGene00018491;WBGene00015565;WBGene00003989;WBGene00005022;WBGene00004374;WBGene00004076;WBGene00019017;WBGene00044638	http://www.ncbi.nlm.nih.gov/pubmed/25875092
Mutants	Down mex-3;skn-1 RNAi mutant 66min	19	280	914	29469	0.00304536	1	0.036693001	WBGene00009444;WBGene00021461;WBGene00000207;WBGene00020902;WBGene00021549;WBGene00012319;WBGene00007010;WBGene00012423;WBGene00004126;WBGene00000867;WBGene00004702;WBGene00004163;WBGene00009701;WBGene00012326;WBGene00020630;WBGene00018013;WBGene00012731;WBGene00000264;WBGene00020684	http://www.ncbi.nlm.nih.gov/pubmed/15772128
DAF/Insulin/food	UP by daf-2 mutant, Monosomal seq	13	280	497	29469	0.003056417	1	0.036693001	WBGene00006926;WBGene00001686;WBGene00015819;WBGene00006929;WBGene00004246;WBGene00007709;WBGene00006927;WBGene00004374;WBGene00004241;WBGene00000867;WBGene00021522;WBGene00014117;WBGene00019017	http://www.ncbi.nlm.nih.gov/pubmed/25600869
Development/Dauer/Aging	Age-related	21	280	1066	29469	0.003167176	1	0.03782466	WBGene00012018;WBGene00000685;WBGene00015565;WBGene00006926;WBGene00003235;WBGene00000207;WBGene00010204;WBGene00006929;WBGene00000392;WBGene00021018;WBGene00003989;WBGene00001976;WBGene00007709;WBGene00010908;WBGene00014117;WBGene00012326;WBGene00020146;WBGene00019017;WBGene00016702;WBGene00000463;WBGene00006930	http://www.ncbi.nlm.nih.gov/pubmed/18662544
TF Targets	UP of endo-siRNA in stau-1 mutant	7	280	150	29469	0.003189594	1	0.037828852	WBGene00077728;WBGene00044502;WBGene00021018;WBGene00017796;WBGene00015488;WBGene00175029;WBGene00021637	http://www.ncbi.nlm.nih.gov/pubmed/26921297
Chemicals/stress	Down dpy-10 mutant	21	280	1067	29469	0.003200522	1	0.037828852	WBGene00009444;WBGene00000465;WBGene00001686;WBGene00005022;WBGene00007709;WBGene00011451;WBGene00004374;WBGene00001161;WBGene00016381;WBGene00004241;WBGene00003917;WBGene00000770;WBGene00000867;WBGene00001607;WBGene00014117;WBGene00022037;WBGene00004163;WBGene00009701;WBGene00020630;WBGene00003067;WBGene00008441	http://www.ncbi.nlm.nih.gov/pubmed/20126308
Mutants	Down pie-1 mutant 23 min after 4 cell stage	28	280	1613	29469	0.0032209	1	0.037874475	WBGene00018491;WBGene00015565;WBGene00012020;WBGene00010204;WBGene00010734;WBGene00003776;WBGene00004374;WBGene00004027;WBGene00001161;WBGene00012319;WBGene00000837;WBGene00007010;WBGene00011720;WBGene00004126;WBGene00001258;WBGene00008405;WBGene00008131;WBGene00012326;WBGene00015492;WBGene00020630;WBGene00013768;WBGene00004465;WBGene00004312;WBGene00013307;WBGene00000264;WBGene00013677;WBGene000…	http://www.ncbi.nlm.nih.gov/pubmed/15772128
TF Targets	dot-1.1 targets	43	280	2879	29469	0.003410115	1	0.039894863	WBGene00006384;WBGene00010507;WBGene00021019;WBGene00001119;WBGene00013638;WBGene00000207;WBGene00001911;WBGene00010204;WBGene00003989;WBGene00015796;WBGene00000480;WBGene00001976;WBGene00006062;WBGene00020902;WBGene00000368;WBGene00018075;WBGene00008446;WBGene00020115;WBGene00000408;WBGene00015488;WBGene00015658;WBGene00006537;WBGene00010011;WBGene00007924;WBGene00003926;WBGene00020770;WBGene000…	http://www.ncbi.nlm.nih.gov/pubmed/23806335
Mutants	Down mex-3;skn-1 RNAi mutant 53min	21	280	1074	29469	0.003442283	1	0.040066774	WBGene00001911;WBGene00000480;WBGene00019538;WBGene00021973;WBGene00006537;WBGene00001161;WBGene00007924;WBGene00004241;WBGene00007010;WBGene00000867;WBGene00021710;WBGene00004163;WBGene00004361;WBGene00012326;WBGene00012674;WBGene00004465;WBGene00013307;WBGene00003214;WBGene00011604;WBGene00001520;WBGene00000463	http://www.ncbi.nlm.nih.gov/pubmed/15772128
Chemicals/stress	Down by mercury high 8H	20	280	1001	29469	0.003519374	1	0.040757197	WBGene00018491;WBGene00012018;WBGene00000465;WBGene00001686;WBGene00000207;WBGene00010204;WBGene00006929;WBGene00005022;WBGene00007709;WBGene00006927;WBGene00004374;WBGene00004076;WBGene00021658;WBGene00000867;WBGene00009701;WBGene00012452;WBGene00009161;WBGene00019017;WBGene00001520;WBGene00006930	http://www.ncbi.nlm.nih.gov/geo/query/acc.cgi?acc=GSE42592
Mutants	UP lin-35 num emb	23	280	1236	29469	0.003763243	1	0.043362396	WBGene00010507;WBGene00009081;WBGene00001686;WBGene00012020;WBGene00006929;WBGene00005022;WBGene00022730;WBGene00011451;WBGene00019198;WBGene00001161;WBGene00016381;WBGene00002063;WBGene00003917;WBGene00000770;WBGene00001459;WBGene00001607;WBGene00008405;WBGene00022099;WBGene00007303;WBGene00016151;WBGene00004312;WBGene00000264;WBGene00016072	http://www.ncbi.nlm.nih.gov/pubmed/17368442
TF Targets	Rb/E2F (dpl-1, efl-1, lin-35) targets, ubiquitous	28	280	1633	29469	0.003800773	1	0.043575863	WBGene00018491;WBGene00001119;WBGene00015565;WBGene00000207;WBGene00001911;WBGene00021884;WBGene00044586;WBGene00005022;WBGene00007709;WBGene00017080;WBGene00006537;WBGene00001161;WBGene00003948;WBGene00003926;WBGene00020038;WBGene00004702;WBGene00022099;WBGene00004361;WBGene00018013;WBGene00004465;WBGene00004700;WBGene00016151;WBGene00021507;WBGene00006571;WBGene00008339;WBGene00000264;WBGene000…	http://www.ncbi.nlm.nih.gov/pubmed/23347407
Microbes	UP D. coniospora 12h, cDNAArray	9	280	263	29469	0.003836229	1	0.04369678	WBGene00000408;WBGene00004241;WBGene00008405;WBGene00022037;WBGene00009701;WBGene00018013;WBGene00021507;WBGene00008441;WBGene00020684	http://www.ncbi.nlm.nih.gov/pubmed/21602919
TF Targets	unc-62 targets and changed in unc-62 RNAi	3	280	10	29469	0.003849433	1	0.04369678	WBGene00006926;WBGene00006927;WBGene00006930	http://www.ncbi.nlm.nih.gov/pubmed/23468654
Mutants	UP by gas-1 mutant (McCormack)	8	280	209	29469	0.003986279	1	0.044831702	WBGene00010507;WBGene00003235;WBGene00009081;WBGene00021018;WBGene00022730;WBGene00000368;WBGene00007303;WBGene00012452	http://www.ncbi.nlm.nih.gov/pubmed/25744875
Development/Dauer/Aging	L3 cluster gene	7	280	157	29469	0.003988516	1	0.044831702	WBGene00006926;WBGene00000465;WBGene00006929;WBGene00000480;WBGene00045272;WBGene00006927;WBGene00006930	http://www.ncbi.nlm.nih.gov/pubmed/20555324
Mutants	down by daf-2 mutant (Rizki)	20	280	1014	29469	0.004039114	1	0.045178971	WBGene00009444;WBGene00015565;WBGene00021884;WBGene00000392;WBGene00020115;WBGene00003926;WBGene00000867;WBGene00008733;WBGene00020038;WBGene00008131;WBGene00015247;WBGene00004702;WBGene00018599;WBGene00020630;WBGene00018013;WBGene00004465;WBGene00012693;WBGene00017999;WBGene00004312;WBGene00050885	http://www.ncbi.nlm.nih.gov/pubmed/21909281
Mutants	Down pie-1; pal-1(RNAi) mutant 41 min after 4 cell stage	21	280	1091	29469	0.004093665	1	0.045402826	WBGene00018491;WBGene00000465;WBGene00001686;WBGene00012020;WBGene00003989;WBGene00003776;WBGene00004374;WBGene00017080;WBGene00004027;WBGene00004241;WBGene00003917;WBGene00012423;WBGene00008131;WBGene00016524;WBGene00009701;WBGene00013768;WBGene00018013;WBGene00012674;WBGene00000264;WBGene00022385;WBGene00003184	http://www.ncbi.nlm.nih.gov/pubmed/15772128
TF Targets	SUP-26::FLAG CLIP Peaks	17	280	794	29469	0.004098729	1	0.045402826	WBGene00018491;WBGene00044728;WBGene00006926;WBGene00000207;WBGene00001911;WBGene00010204;WBGene00001976;WBGene00003776;WBGene00006537;WBGene00004076;WBGene00007924;WBGene00022037;WBGene00004700;WBGene00009161;WBGene00019017;WBGene00001520;WBGene00006930	https://www.ncbi.nlm.nih.gov/pubmed/28279983
Mutants	Down pie-1 mutant 83 min after 4 cell stage	15	280	653	29469	0.004150805	1	0.045758639	WBGene00012020;WBGene00006062;WBGene00018310;WBGene00004027;WBGene00002063;WBGene00012319;WBGene00000837;WBGene00000867;WBGene00020038;WBGene00009701;WBGene00013307;WBGene00003184;WBGene00020684;WBGene00000463;WBGene00006930	http://www.ncbi.nlm.nih.gov/pubmed/15772128
Mutants	Changed between CB4856 and N2, Old	39	280	2567	29469	0.004219621	1	0.046294692	WBGene00016070;WBGene00021019;WBGene00001119;WBGene00001911;WBGene00010204;WBGene00021589;WBGene00019598;WBGene00022110;WBGene00001976;WBGene00019267;WBGene00018310;WBGene00012953;WBGene00006927;WBGene00018807;WBGene00015488;WBGene00019574;WBGene00020451;WBGene00002063;WBGene00007924;WBGene00011511;WBGene00004241;WBGene00012319;WBGene00000837;WBGene00001178;WBGene00000867;WBGene00003130;WBGene000…	http://www.ncbi.nlm.nih.gov/pubmed/22670229
Chemicals/stress	Down BY HuminFeed 2.0 3D	29	280	1730	29469	0.004311257	1	0.047074818	WBGene00021884;WBGene00019598;WBGene00022110;WBGene00022730;WBGene00010734;WBGene00001161;WBGene00016381;WBGene00003917;WBGene00000867;WBGene00001607;WBGene00008405;WBGene00004386;WBGene00004702;WBGene00022099;WBGene00004361;WBGene00009701;WBGene00018599;WBGene00007303;WBGene00020630;WBGene00013768;WBGene00018013;WBGene00004465;WBGene00004700;WBGene00004312;WBGene00008339;WBGene00011604;WBGene000…	http://www.ncbi.nlm.nih.gov/pubmed/22529848
TF Targets	rnp-8 associated	18	280	872	29469	0.00434938	1	0.047108748	WBGene00012020;WBGene00021884;WBGene00004246;WBGene00004374;WBGene00004027;WBGene00016381;WBGene00012423;WBGene00021658;WBGene00000770;WBGene00000867;WBGene00022037;WBGene00004163;WBGene00009701;WBGene00020630;WBGene00018013;WBGene00013307;WBGene00003184;WBGene00020684	http://www.ncbi.nlm.nih.gov/pubmed/20855596
Mutants	UP lin-35 mutant(n745, NULL) L1	22	280	1174	29469	0.004355453	1	0.047108748	WBGene00010507;WBGene00001686;WBGene00012020;WBGene00005022;WBGene00022730;WBGene00007709;WBGene00011451;WBGene00019198;WBGene00001161;WBGene00016381;WBGene00002063;WBGene00003917;WBGene00000770;WBGene00001459;WBGene00001607;WBGene00022099;WBGene00007303;WBGene00016151;WBGene00004312;WBGene00006571;WBGene00000264;WBGene00016072	http://www.ncbi.nlm.nih.gov/pubmed/17368442
Mutants	UP by lin-35 mutant (Petrella)	15	280	657	29469	0.004376804	1	0.04711742	WBGene00016070;WBGene00012020;WBGene00004246;WBGene00005022;WBGene00011451;WBGene00019198;WBGene00018807;WBGene00001161;WBGene00016381;WBGene00020451;WBGene00008733;WBGene00021522;WBGene00007303;WBGene00016151;WBGene00000264	http://www.ncbi.nlm.nih.gov/pubmed/21343362
TF Targets	ego-1 putative targets, L4 and adult	12	280	456	29469	0.004518115	1	0.048411387	WBGene00000685;WBGene00010204;WBGene00003989;WBGene00003884;WBGene00010011;WBGene00003948;WBGene00008140;WBGene00004702;WBGene00004465;WBGene00000264;WBGene00003214;WBGene00011604	http://www.ncbi.nlm.nih.gov/pubmed/21396820
TF Targets	egl-5 L3 targets	17	280	804	29469	0.004613629	1	0.049074353	WBGene00018491;WBGene00000207;WBGene00003989;WBGene00007709;WBGene00015658;WBGene00006537;WBGene00001161;WBGene00003948;WBGene00007924;WBGene00004126;WBGene00006796;WBGene00020146;WBGene00013603;WBGene00020630;WBGene00004465;WBGene00016151;WBGene00008339	http://www.ncbi.nlm.nih.gov/pubmed/21177963
Mutants	down by wdr-5 mutant	7	280	162	29469	0.004643692	1	0.049074353	WBGene00012985;WBGene00077728;WBGene00018664;WBGene00021606;WBGene00018658;WBGene00016150;WBGene00003067	http://www.ncbi.nlm.nih.gov/pubmed/25310986
Mutants	Activated by skn-1 (Germ cell absence)	13	280	524	29469	0.004644193	1	0.049074353	WBGene00009444;WBGene00000392;WBGene00019598;WBGene00003948;WBGene00016381;WBGene00003926;WBGene00021658;WBGene00044541;WBGene00014117;WBGene00022099;WBGene00004465;WBGene00003184;WBGene00020684	http://www.ncbi.nlm.nih.gov/pubmed/26196144
Chemicals/stress	Down dpy-9 mutant	17	280	806	29469	0.004722703	1	0.049645044	WBGene00001686;WBGene00006929;WBGene00007709;WBGene00011451;WBGene00004374;WBGene00001161;WBGene00016381;WBGene00004241;WBGene00000770;WBGene00000867;WBGene00001607;WBGene00014117;WBGene00022037;WBGene00004163;WBGene00009701;WBGene00020630;WBGene00003067	http://www.ncbi.nlm.nih.gov/pubmed/20126308
Mutants	UP by plep-1 mutant (young adult hermaphrodites)	12	280	459	29469	0.004741502	1	0.049645044	WBGene00021019;WBGene00015565;WBGene00003235;WBGene00000465;WBGene00021461;WBGene00001161;WBGene00045410;WBGene00010908;WBGene00004361;WBGene00014259;WBGene00017999;WBGene00022385	http://www.ncbi.nlm.nih.gov/geo/query/acc.cgi?acc=GSE68351
TF Targets	LIN-13 Emb Targets	22	280	1191	29469	0.005115252	1	0.053240438	WBGene00006384;WBGene00001119;WBGene00000207;WBGene00001976;WBGene00008446;WBGene00018807;WBGene00000408;WBGene00001161;WBGene00000514;WBGene00001258;WBGene00020038;WBGene00004702;WBGene00006796;WBGene00015492;WBGene00020630;WBGene00004465;WBGene00004700;WBGene00021507;WBGene00008339;WBGene00000393;WBGene00007119;WBGene00001520	http://www.ncbi.nlm.nih.gov/pubmed/21177963
Tissue	enriched by CYE-1/CDK-2AF expession Muscle	8	280	219	29469	0.005131329	1	0.053240438	WBGene00009444;WBGene00011451;WBGene00016381;WBGene00003917;WBGene00001607;WBGene00022099;WBGene00016151;WBGene00006571	http://www.ncbi.nlm.nih.gov/pubmed/22102824
Mutants	UP by lin-54;mes-4 mutant (germline)	10	280	337	29469	0.00519205	1	0.053627793	WBGene00003235;WBGene00000207;WBGene00001911;WBGene00008446;WBGene00015492;WBGene00016150;WBGene00020630;WBGene00017186;WBGene00001520;WBGene00000463	http://www.ncbi.nlm.nih.gov/pubmed/24281426
Mutants	UP by nuo-6 mutant	37	280	2433	29469	0.005380407	1	0.055324094	WBGene00001119;WBGene00003235;WBGene00012020;WBGene00000207;WBGene00000392;WBGene00019598;WBGene00019789;WBGene00022110;WBGene00001976;WBGene00007709;WBGene00018310;WBGene00012953;WBGene00008446;WBGene00000408;WBGene00015488;WBGene00002063;WBGene00004241;WBGene00012319;WBGene00002990;WBGene00012423;WBGene00001459;WBGene00021606;WBGene00001607;WBGene00009572;WBGene00009701;WBGene00007303;WBGene000…	http://www.ncbi.nlm.nih.gov/pubmed/24813612
Mutants	Down pie-1; pal-1(RNAi) mutant 143 min after 4 cell stage	14	280	604	29469	0.005471641	1	0.056011042	WBGene00001686;WBGene00012020;WBGene00017080;WBGene00006537;WBGene00003948;WBGene00004241;WBGene00001258;WBGene00003130;WBGene00022037;WBGene00009701;WBGene00018599;WBGene00006796;WBGene00013768;WBGene00020684	http://www.ncbi.nlm.nih.gov/pubmed/15772128
TF Targets	CEH-30 Emb targets	20	280	1045	29469	0.005539719	1	0.056455892	WBGene00006384;WBGene00001119;WBGene00000207;WBGene00000408;WBGene00015488;WBGene00007924;WBGene00011511;WBGene00012319;WBGene00004126;WBGene00001258;WBGene00020038;WBGene00008405;WBGene00004361;WBGene00006796;WBGene00015492;WBGene00013603;WBGene00020630;WBGene00008339;WBGene00003214;WBGene00007119	http://www.ncbi.nlm.nih.gov/pubmed/21177963
Mutants	down by let-7 mutant (Rausch)	4	280	38	29469	0.005599863	1	0.056816313	WBGene00006926;WBGene00006929;WBGene00006927;WBGene00006930	https://www.ncbi.nlm.nih.gov/pubmed/25732775
Other	Regulators of hrg-1	7	280	171	29469	0.006017876	1	0.060788501	WBGene00006384;WBGene00012018;WBGene00000207;WBGene00009161;WBGene00019017;WBGene00013677;WBGene00001520	https://www.ncbi.nlm.nih.gov/pubmed/28581477
Other	Operons1	16	280	762	29469	0.006606674	1	0.066443432	WBGene00009444;WBGene00003235;WBGene00000480;WBGene00011451;WBGene00004374;WBGene00021973;WBGene00017080;WBGene00015488;WBGene00011812;WBGene00008140;WBGene00012319;WBGene00003130;WBGene00008131;WBGene00004386;WBGene00004312;WBGene00011604	http://www.ncbi.nlm.nih.gov/pubmed/12075352
TF Targets	eap-1 targets G10 (spr-5 mutant, generation 10)	72	280	5666	29469	0.006813423	1	0.068223487	WBGene00006384;WBGene00010507;WBGene00195233;WBGene00021019;WBGene00001119;WBGene00018929;WBGene00185118;WBGene00012020;WBGene00021884;WBGene00022729;WBGene00021018;WBGene00202494;WBGene00022730;WBGene00019538;WBGene00019267;WBGene00018075;WBGene00045382;WBGene00003884;WBGene00019198;WBGene00045272;WBGene00010057;WBGene00008446;WBGene00012374;WBGene00020115;WBGene00197277;WBGene00003776;WBGene000…	http://www.ncbi.nlm.nih.gov/pubmed/24685137
Mutants	UP dys-1 mutants	4	280	41	29469	0.006929995	1	0.069089032	WBGene00010507;WBGene00006927;WBGene00014562;WBGene00012452	http://www.ncbi.nlm.nih.gov/pubmed/16962739
TF Targets	MAB-5 L3 Targets	27	280	1634	29469	0.007271921	1	0.072058472	WBGene00018491;WBGene00003989;WBGene00001976;WBGene00006062;WBGene00007709;WBGene00020902;WBGene00000368;WBGene00015658;WBGene00006537;WBGene00021549;WBGene00001161;WBGene00003926;WBGene00010908;WBGene00004126;WBGene00020038;WBGene00004702;WBGene00004361;WBGene00000177;WBGene00006796;WBGene00020146;WBGene00013603;WBGene00020630;WBGene00004465;WBGene00004700;WBGene00021507;WBGene00008339;WBGene000…	http://www.ncbi.nlm.nih.gov/pubmed/21177963
Microbes	down by B. thuringiensis (BT247), C. elegans strain MY18	8	280	234	29469	0.007290696	1	0.072058472	WBGene00012018;WBGene00006926;WBGene00010204;WBGene00006929;WBGene00018310;WBGene00006927;WBGene00019017;WBGene00006930	http://www.ncbi.nlm.nih.gov/pubmed/21931778
Mutants	UP mep-1 RNAi	9	280	295	29469	0.007523553	1	0.074040799	WBGene00001686;WBGene00022730;WBGene00007709;WBGene00018310;WBGene00000770;WBGene00000867;WBGene00009572;WBGene00007303;WBGene00017186	http://www.ncbi.nlm.nih.gov/pubmed/21060680
Other	Environemental genotypic genes	16	280	774	29469	0.0075722	1	0.074076725	WBGene00021019;WBGene00001119;WBGene00000685;WBGene00022020;WBGene00021148;WBGene00001976;WBGene00022730;WBGene00044413;WBGene00018310;WBGene00015488;WBGene00020770;WBGene00001178;WBGene00000514;WBGene00020146;WBGene00012452;WBGene00000463	http://www.ncbi.nlm.nih.gov/pubmed/22669615
Chemicals/stress	down by aqueous garlic extract, proteomics	3	280	14	29469	0.007591814	1	0.074076725	WBGene00018491;WBGene00006926;WBGene00006930	http://www.ncbi.nlm.nih.gov/pubmed/25940980
Mutants	Down pie-1 mutant 66 min after 4 cell stage	20	280	1079	29469	0.007683989	1	0.074658422	WBGene00018491;WBGene00009444;WBGene00000465;WBGene00012020;WBGene00003884;WBGene00004374;WBGene00017080;WBGene00004027;WBGene00011511;WBGene00004241;WBGene00001258;WBGene00003130;WBGene00004361;WBGene00012326;WBGene00013768;WBGene00016151;WBGene00013677;WBGene00000393;WBGene00003184;WBGene00020684	http://www.ncbi.nlm.nih.gov/pubmed/15772128
Mutants	Down mex-3;skn-1 RNAi mutant 122min	20	280	1080	29469	0.007756023	1	0.075040339	WBGene00012020;WBGene00021589;WBGene00019538;WBGene00020902;WBGene00018202;WBGene00006537;WBGene00004027;WBGene00007010;WBGene00004126;WBGene00001178;WBGene00008131;WBGene00022099;WBGene00018013;WBGene00004465;WBGene00000264;WBGene00021637;WBGene00016072;WBGene00001520;WBGene00020684;WBGene00000463	http://www.ncbi.nlm.nih.gov/pubmed/15772128
TF Targets	HLH-27 targets	25	280	1483	29469	0.008029963	1	0.077364307	WBGene00021461;WBGene00010204;WBGene00006929;WBGene00045289;WBGene00000392;WBGene00004246;WBGene00000480;WBGene00018075;WBGene00004374;WBGene00004027;WBGene00044439;WBGene00002063;WBGene00011720;WBGene00008733;WBGene00044541;WBGene00020038;WBGene00004361;WBGene00015366;WBGene00015492;WBGene00004465;WBGene00012693;WBGene00010768;WBGene00007376;WBGene00045043;WBGene00001520	http://www.ncbi.nlm.nih.gov/pubmed/19632181
Other	Change with siRNA reads, coding region, 3'UTR	6	280	130	29469	0.00816473	1	0.078333581	WBGene00007485;WBGene00021019;WBGene00019574;WBGene00045410;WBGene00000463;WBGene00008178	http://www.ncbi.nlm.nih.gov/pubmed/23329696
Mutants	UP rrf-3 mutant	13	280	566	29469	0.008361318	1	0.079885428	WBGene00010507;WBGene00000465;WBGene00001686;WBGene00012020;WBGene00022729;WBGene00021018;WBGene00019598;WBGene00022730;WBGene00007709;WBGene00004374;WBGene00014117;WBGene00009572;WBGene00012452	http://www.ncbi.nlm.nih.gov/pubmed/17919598
Mutants	Down nth-1;xbp-1 mutant	15	280	711	29469	0.008528182	1	0.081141579	WBGene00010204;WBGene00006929;WBGene00044586;WBGene00006927;WBGene00011720;WBGene00000867;WBGene00001607;WBGene00009701;WBGene00006571;WBGene00019017;WBGene00017186;WBGene00000264;WBGene00003184;WBGene00020684;WBGene00006930	http://www.ncbi.nlm.nih.gov/pubmed/20382984
Mutants	UP mex-3;skn-1 RNAi mutant 186min	12	280	499	29469	0.008643409	1	0.081898083	WBGene00008517;WBGene00001686;WBGene00001911;WBGene00000480;WBGene00006927;WBGene00011511;WBGene00012319;WBGene00012326;WBGene00008339;WBGene00008441;WBGene00016702;WBGene00001520	http://www.ncbi.nlm.nih.gov/pubmed/15772128
Mutants	UP by mes-4 mutant (germline)	13	280	571	29469	0.008926146	1	0.084229027	WBGene00015565;WBGene00000207;WBGene00001911;WBGene00001976;WBGene00019267;WBGene00018075;WBGene00003884;WBGene00012326;WBGene00015492;WBGene00020630;WBGene00017186;WBGene00000393;WBGene00001520	http://www.ncbi.nlm.nih.gov/pubmed/24281426
Mutants	UP wdr-5 mutant Day1 Transgenerational	20	280	1100	29469	0.009315669	1	0.087544384	WBGene00006926;WBGene00000465;WBGene00001686;WBGene00012020;WBGene00006929;WBGene00000480;WBGene00022110;WBGene00007709;WBGene00006927;WBGene00004374;WBGene00004027;WBGene00016381;WBGene00004241;WBGene00000867;WBGene00001607;WBGene00014117;WBGene00009701;WBGene00003184;WBGene00020684;WBGene00006930	http://www.ncbi.nlm.nih.gov/pubmed/22012258
Mutants	UP by egl-9;vhl-1 mutant (Albores)	12	280	505	29469	0.00939736	1	0.087951622	WBGene00001119;WBGene00012018;WBGene00006926;WBGene00003776;WBGene00004374;WBGene00006537;WBGene00004076;WBGene00011511;WBGene00003130;WBGene00001607;WBGene00006796;WBGene00006571	http://www.biorxiv.org/content/early/2017/03/02/112920.1
Mutants	down by cyc-1 RNAi	46	280	3330	29469	0.009658496	1	0.090028173	WBGene00008517;WBGene00009444;WBGene00013638;WBGene00003235;WBGene00012020;WBGene00015819;WBGene00000392;WBGene00015796;WBGene00008007;WBGene00008446;WBGene00004374;WBGene00003948;WBGene00020451;WBGene00007924;WBGene00014562;WBGene00004241;WBGene00003917;WBGene00000837;WBGene00010908;WBGene00012423;WBGene00000514;WBGene00000770;WBGene00000867;WBGene00001258;WBGene00003130;WBGene00001607;WBGene000…	http://www.ncbi.nlm.nih.gov/pubmed/19360127
Development/Dauer/Aging	Embryonic Pan-neural enriched	26	280	1591	29469	0.009768413	1	0.090684095	WBGene00010507;WBGene00018491;WBGene00001119;WBGene00021461;WBGene00001911;WBGene00010204;WBGene00000392;WBGene00022110;WBGene00001976;WBGene00006062;WBGene00018075;WBGene00003884;WBGene00017080;WBGene00003948;WBGene00016381;WBGene00003917;WBGene00011720;WBGene00004126;WBGene00000514;WBGene00001459;WBGene00021710;WBGene00004702;WBGene00016150;WBGene00013307;WBGene00015703;WBGene00007119	http://www.ncbi.nlm.nih.gov/pubmed/17612406
Mutants	down by crh-1 mutant (Xiao)	23	280	1349	29469	0.010075255	1	0.093049602	WBGene00006926;WBGene00000465;WBGene00012020;WBGene00015819;WBGene00006929;WBGene00021884;WBGene00015796;WBGene00007709;WBGene00006927;WBGene00004374;WBGene00004027;WBGene00004241;WBGene00021658;WBGene00000867;WBGene00001607;WBGene00014117;WBGene00015247;WBGene00022037;WBGene00004163;WBGene00009701;WBGene00003184;WBGene00020684;WBGene00006930	http://www.ncbi.nlm.nih.gov/geo/query/acc.cgi?acc=GSE40809
Chemicals/stress	UV regulated under glp-1 mutant	6	280	137	29469	0.010104383	1	0.093049602	WBGene00000480;WBGene00017080;WBGene00003948;WBGene00001459;WBGene00015247;WBGene00004465	http://www.ncbi.nlm.nih.gov/pubmed/19879883
Mutants	Down tdp-1 mutant	34	280	2281	29469	0.010481509	1	0.096136397	WBGene00018491;WBGene00015565;WBGene00000465;WBGene00009081;WBGene00000207;WBGene00000392;WBGene00003989;WBGene00006062;WBGene00007709;WBGene00020902;WBGene00000368;WBGene00019198;WBGene00008446;WBGene00004374;WBGene00006537;WBGene00003948;WBGene00004076;WBGene00004241;WBGene00012423;WBGene00021658;WBGene00000867;WBGene00001459;WBGene00001258;WBGene00001607;WBGene00022037;WBGene00012326;WBGene000…	http://www.ncbi.nlm.nih.gov/pubmed/22232551
Mutants	UP by lin-28 RNAi	17	280	881	29469	0.0106041	1	0.096873312	WBGene00009444;WBGene00000480;WBGene00001976;WBGene00001161;WBGene00003917;WBGene00011720;WBGene00012423;WBGene00003130;WBGene00013270;WBGene00016524;WBGene00006796;WBGene00013768;WBGene00018013;WBGene00012674;WBGene00021507;WBGene00006571;WBGene00011604	https://www.ncbi.nlm.nih.gov/pubmed/27730721
Chemicals/stress	down by hypoxia at 3h, neurons	4	280	48	29469	0.010710773	1	0.097459532	WBGene00006926;WBGene00006929;WBGene00045272;WBGene00006930	https://www.ncbi.nlm.nih.gov/pubmed/28495447
Mutants	UP kgb-1 mutant vs. wt by Fed	10	280	379	29469	0.010768224	1	0.097595013	WBGene00000465;WBGene00022110;WBGene00019538;WBGene00007709;WBGene00019433;WBGene00021522;WBGene00001607;WBGene00004702;WBGene00022099;WBGene00003214	http://www.ncbi.nlm.nih.gov/pubmed/23352664
Mutants	UP mes-4 mes-2 mutant	7	280	194	29469	0.010845775	1	0.097910876	WBGene00015565;WBGene00003235;WBGene00000207;WBGene00018310;WBGene00015492;WBGene00020630;WBGene00001520	http://www.ncbi.nlm.nih.gov/pubmed/23103171
