# Supplementary material for: Stress resets ancestral heritable small RNA responses
Source: eLife journal article supplement (doi:10.7554/elife.65797), 2021-03-16
Supplement: supp [file elife-65797-supp-v1.zip › elife_poa_e65797_Supplementary_file_4.csv]

WB ID	gene ID
WBGene00020716	phf-30
WBGene00012167	tofu-5
WBGene00001584	nrde-4
WBGene00003787	npp-1
WBGene00004745	sdc-1
WBGene00001855	hil-4
WBGene00022850
WBGene00023497	lin-15B
WBGene00007615	set-31
WBGene00022034	deps-1
WBGene00000411	cdl-1
WBGene00012845	set-24
WBGene00004326	rde-4
WBGene00003499	mut-2
WBGene00004323	rde-1
WBGene00007784	ruvb-1
WBGene00004385	rnp-2
WBGene00003222	mes-4
WBGene00011908	pash-1
WBGene00007578
WBGene00019628	pup-2
WBGene00012802	set-25
WBGene00003395	mom-2
WBGene00019971	ergo-1
WBGene00003508	mut-16
WBGene00004179	prg-2
WBGene00004955	spd-5
WBGene00016566	eri-7
WBGene00012234	ints-4
WBGene00017990	cec-4
WBGene00012527	set-22
WBGene00004117	sin-3
WBGene00002079	xpo-2
WBGene00001569	meg-3
WBGene00004750	sea-1
WBGene00002169	isw-1
WBGene00004152	pqn-70
WBGene00000774	cpf-2
WBGene00002994	lin-5
WBGene00021282	set-21
WBGene00009163	drsh-1
WBGene00016603	met-1
WBGene00001470	baz-2
WBGene00016992	zhit-1
WBGene00044069	hat-1
WBGene00004510	rrf-3
WBGene00009672
WBGene00003406	mrg-1
WBGene00016485	meg-4
WBGene00020558
WBGene00015939	damt-1
WBGene00003795	npp-9
WBGene00004386	rnp-3
WBGene00001435	fkh-3
WBGene00016409	sumv-1
WBGene00017620	tofu-2
WBGene00016313	set-4
WBGene00004681	rsd-2
WBGene00004684	rsd-6
WBGene00011615	lsd-1
WBGene00019862	nrde-3
WBGene00019947	htz-1
WBGene00002076	imb-2
WBGene00003802	npp-16
WBGene00011061	wago-1
WBGene00012982	jmjd-2
WBGene00007624	hrde-1
WBGene00000106	alg-2
WBGene00003391	mog-3
WBGene00022620	rde-8
WBGene00022831	cec-10
WBGene00004795	sid-1
WBGene00020403	hrde-4
