# Supplementary material for: Stress resets ancestral heritable small RNA responses
Source: eLife journal article supplement (doi:10.7554/elife.65797), 2021-03-16
Supplement: supp [file elife-65797-supp-v1.zip › elife_poa_e65797_Supplementary_file_5.csv]

WB ID	gene ID
WBGene00019628	pup-2
WBGene00015939	damt-1
WBGene00004781	set-1
WBGene00003395	mom-2
WBGene00004786	sex-1
WBGene00004920	snr-7
WBGene00004152	pqn-70
WBGene00001470	baz-2
WBGene00016485	meg-4
WBGene00020204	T04B8.2
WBGene00004750	sea-1
WBGene00013596	nyn-2
WBGene00016566	eri-7
WBGene00004745	sdc-1
WBGene00011615	lsd-1
WBGene00017993	cec-5
WBGene00017046	utx-1
WBGene00004800	sir-2.1
WBGene00022620	rde-8
WBGene00001436	fkh-4
WBGene00019947	htz-1
WBGene00000137	amx-1
WBGene00021913	cec-8
WBGene00019862	nrde-3
WBGene00023497	lin-15B
WBGene00019629	cid-1
WBGene00001569	meg-3
WBGene00017990	cec-4
WBGene00001086	dpy-27
WBGene00004510	rrf-3
WBGene00004803	sir-2.4
WBGene00012551	cec-7
WBGene00009163	drsh-1
WBGene00016603	met-1
WBGene00004747	sdc-3
