# Supplementary material for: Stress resets ancestral heritable small RNA responses
Source: eLife journal article supplement (doi:10.7554/elife.65797), 2021-03-16
Supplement: supp [file elife-65797-supp-v1.zip › elife_poa_e65797_Supplementary_file_6.csv]

name	samples	obs	exp	log2_fold_enrichment	pval	padj	significant
epigenetic_related_genes	599	35	9.001767999	1.959074634	1.00E-04	0.0002	TRUE
P_granule_proteins	599	7	2.147480601	1.704709823	0.00679932	0.006799	TRUE
