# Supplementary material for: Stress resets ancestral heritable small RNA responses
Source: eLife journal article supplement (doi:10.7554/elife.65797), 2021-03-16
Supplement: supp [file elife-65797-supp-v1.zip › elife_poa_e65797_Supplementary_file_7.csv]

gene_symbol	i_am_tf	gene_description	chromosome_name	upstream	upstream_source	downstream	organism	p_value
unc-130	0	hypothetical protein	chrII	2	Mathelier 2014	0	Caenorhabditis elegans	0.0001
mog-2	0	Probable U2 small nuclear ribonucleoprotein A'	chrII	3	Mathelier 2014	0	Caenorhabditis elegans	0.0001
mtk-1	0	MTK1/MEKK4 homolog	chrI	1	Mathelier 2014	0	Caenorhabditis elegans	0.0001
pop-1	0	Protein pop-1	chrI	2	Mathelier 2014	0	Caenorhabditis elegans	0.0001
nrde-4	0	hypothetical protein	chrIV	3	Mathelier 2014	0	Caenorhabditis elegans	0.0001
wago-2	0	Worm ArGOnaute protein	chrI	3	Mathelier 2014	0	Caenorhabditis elegans	0.0001
rpn-12	0	26S proteasome non-ATPase regulatory subunit 8	chrII	2	Mathelier 2014	0	Caenorhabditis elegans	0.0001
rnp-3	0	RNP (RRM RNA binding domain) containing	chrIV	3	Mathelier 2014	0	Caenorhabditis elegans	0.0001
mes-2	0	Histone-lysine N-methyltransferase mes-2	chrII	4	Mathelier 2014	0	Caenorhabditis elegans	0.0001
rrf-3	0	RNA-dependent RNA polymerase Family	chrII	2	Mathelier 2014	0	Caenorhabditis elegans	0.0001
hpl-2	0	HP1 Like (heterochromatin protein)	chrIII	1	Mathelier 2014	0	Caenorhabditis elegans	0.0001
ekl-1	0	hypothetical protein	chrI	1	Mathelier 2014	0	Caenorhabditis elegans	0.0001
ego-1	0	Enhancer of Glp-One (glp-1)	chrI	2	Mathelier 2014	0	Caenorhabditis elegans	0.0001
set-14	0	SET domain-containing protein 14	chrII	2	Mathelier 2014	0	Caenorhabditis elegans	0.0001
set-1	0	Probable histone-lysine N-methyltransferase set-1	chrIII	2	Mathelier 2014	0	Caenorhabditis elegans	0.0001
snr-7	0	Probable small nuclear ribonucleoprotein G	chrI	3	Mathelier 2014	0	Caenorhabditis elegans	0.0001
drh-3	0	Dicer Related Helicase	chrI	3	Mathelier 2014	0	Caenorhabditis elegans	0.0001
set-13	0	SET (trithorax/polycomb) domain containing	chrII	4	Mathelier 2014	0	Caenorhabditis elegans	0.0001
hil-4	0	Histone H1.4	chrV	4	Mathelier 2014	0	Caenorhabditis elegans	0.0001
sea-2	0	Signal Element on Autosome	chrII	2	Mathelier 2014	0	Caenorhabditis elegans	0.0001
set-23	0	Probable histone-lysine N-methyltransferase set-23	chrIV	3	Mathelier 2014	0	Caenorhabditis elegans	0.0001
nhl-2	0	NHL (ring finger b-box coiled coil) domain containing	chrIII	2	Mathelier 2014	0	Caenorhabditis elegans	0.0001
cfim-1	0	Cleavage Factor IM (CFIm) homolog	chrI	2	Mathelier 2014	0	Caenorhabditis elegans	0.0001
set-20	0	SET (trithorax/polycomb) domain containing	chrX	3	Mathelier 2014	0	Caenorhabditis elegans	0.0001
aco-2	0	Probable aconitate hydratase, mitochondrial	chrIII	5	Mathelier 2014	0	Caenorhabditis elegans	0.0001
eri-1	0	3'-5' exonuclease eri-1	chrIV	1	Mathelier 2014	0	Caenorhabditis elegans	0.0001
set-3	0	SET domain-containing protein 3	chrIII	2	Mathelier 2014	0	Caenorhabditis elegans	0.0001
rsd-2	0	hypothetical protein	chrIV	4	Mathelier 2014	0	Caenorhabditis elegans	0.0001
met-2	0	histone METhyltransferase-like	chrIII	3	Mathelier 2014	0	Caenorhabditis elegans	0.0001
adr-2	0	Probable double-stranded RNA-specific adenosine deaminase	chrIII	1	Mathelier 2014	0	Caenorhabditis elegans	0.0001
sid-5	0	Systemic RNA interference defective protein 5	chrX	2	Mathelier 2014	0	Caenorhabditis elegans	0.0001
rde-10	0	hypothetical protein	chrI	1	Mathelier 2014	0	Caenorhabditis elegans	0.0001
rnp-2	0	RNP (RRM RNA binding domain) containing	chrIV	2	Mathelier 2014	0	Caenorhabditis elegans	0.0001
dpy-30	0	Dosage compensation protein dpy-30	chrV	3	Mathelier 2014	0	Caenorhabditis elegans	0.0001
sir-2.4	0	NAD-dependent protein deacetylase sir-2.4	chrI	1	Mathelier 2014	0	Caenorhabditis elegans	0.0001
met-1	0	histone METhyltransferase-like	chrI	5	Mathelier 2014	0	Caenorhabditis elegans	0.0001
xrn-1	0	XRN (mouse/S. cerevisiae) ribonuclease related	chrII	1	Mathelier 2014	0	Caenorhabditis elegans	0.0001
mrp-1	0	hypothetical protein	chrX	1	Mathelier 2014	0	Caenorhabditis elegans	0.0001
rha-2	0	Putative ATP-dependent RNA helicase rha-2	chrIII	1	Mathelier 2014	0	Caenorhabditis elegans	0.0001
xol-1	0	XO lethal protein 1	chrX	5	Mathelier 2014	0	Caenorhabditis elegans	0.0001
set-24	0	SET (trithorax/polycomb) domain containing	chrII	1	Mathelier 2014	0	Caenorhabditis elegans	0.0001
imb-2	0	IMportin Beta family	chrII	3	Mathelier 2014	0	Caenorhabditis elegans	0.0001
mom-2	0	Protein mom-2	chrV	4	Mathelier 2014	0	Caenorhabditis elegans	0.0001
hil-1	0	Histone H1.X	chrV	3	Mathelier 2014	0	Caenorhabditis elegans	0.0001
rde-2	0	hypothetical protein	chrI	2	Mathelier 2014	0	Caenorhabditis elegans	0.0001
rsd-6	0	hypothetical protein	chrI	3	Mathelier 2014	0	Caenorhabditis elegans	0.0001
jmjd-1.2	0	JuMonJi (transcription factor) Domain protein	chrIV	3	Mathelier 2014	0	Caenorhabditis elegans	0.0001
htz-1	0	Histone H2A.V	chrIV	2	Mathelier 2014	0	Caenorhabditis elegans	0.0001
sid-2	0	Systemic RNA interference defective protein 2	chrIII	2	Mathelier 2014	0	Caenorhabditis elegans	0.0001
tcer-1	0	TransCription Elongation Regulator homolog	chrII	2	Mathelier 2014	0	Caenorhabditis elegans	0.0001
sid-3	0	Tyrosine-protein kinase sid-3	chrX	1	Mathelier 2014	0	Caenorhabditis elegans	0.0001
sin-3	0	SIN3 (yeast Switch INdependent) histone deacetylase component homolog	chrI	3	Mathelier 2014	0	Caenorhabditis elegans	0.0001
sago-1	0	Synthetic secondary siRNA-deficient ArGOnaute mutant	chrV	2	Mathelier 2014	0	Caenorhabditis elegans	0.0001
dcr-1	0	Endoribonuclease dcr-1	chrIII	2	Mathelier 2014	0	Caenorhabditis elegans	0.0001
wdr-5.1	0	WD repeat-containing protein wdr-5.1	chrIII	3	Mathelier 2014	0	Caenorhabditis elegans	0.0001
emb-4	0	hypothetical protein	chrV	2	Mathelier 2014	0	Caenorhabditis elegans	0.0001
pash-1	0	PArtner of DroSHa (DRSH-1 interactor)	chrI	4	Mathelier 2014	0	Caenorhabditis elegans	0.0001
alg-1	0	Argonaute (plant)-Like Gene	chrX	4	Mathelier 2014	0	Caenorhabditis elegans	0.0001
adr-1	0	Adenosine Deaminase acting on RNA	chrI	2	Mathelier 2014	0	Caenorhabditis elegans	0.0001
prg-1	0	Piwi (fruitfly) Related Gene	chrI	4	Mathelier 2014	0	Caenorhabditis elegans	0.0001
ppw-1	0	PAZ/PIWI domain-containing	chrI	1	Mathelier 2014	0	Caenorhabditis elegans	0.0001
smg-5	0	Suppressor with Morphological effect on Genitalia	chrI	3	Mathelier 2014	0	Caenorhabditis elegans	0.0001
eri-7	0	Enhanced RNAI (RNA interference)	chrI	3	Mathelier 2014	0	Caenorhabditis elegans	0.0001
