# Supplementary figures and images for: Stress resets ancestral heritable small RNA responses
Source: eLife journal article supplement (doi:10.7554/elife.65797), 2021-03-16

A.

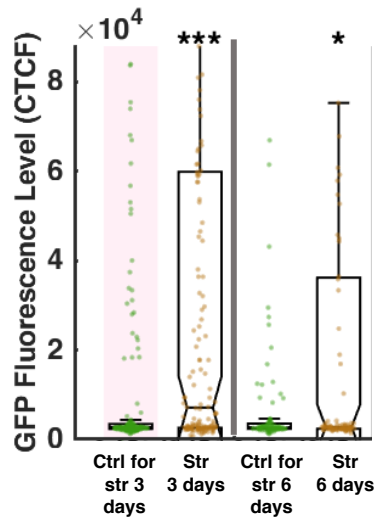

B.

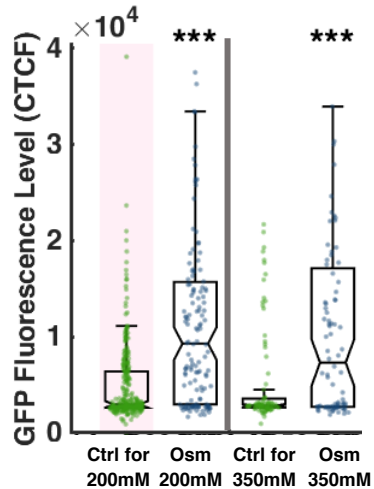

C.

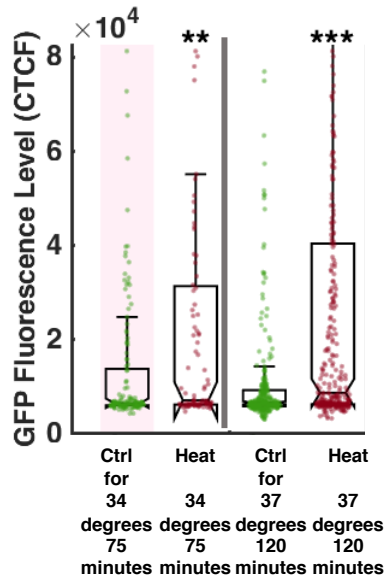

Supplement: supp [file elife-65797-supp-v1.zip › elife_poa_e65797_Figure_1_figure_supplement_1.pdf]

A.

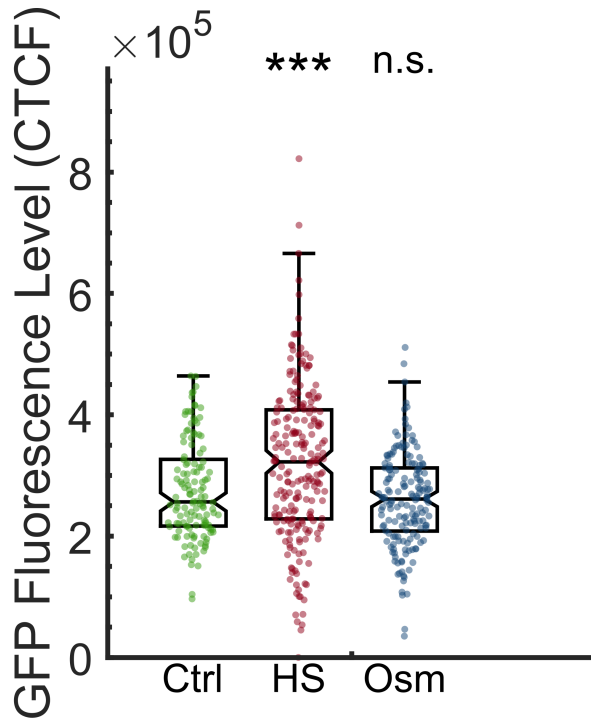

B.

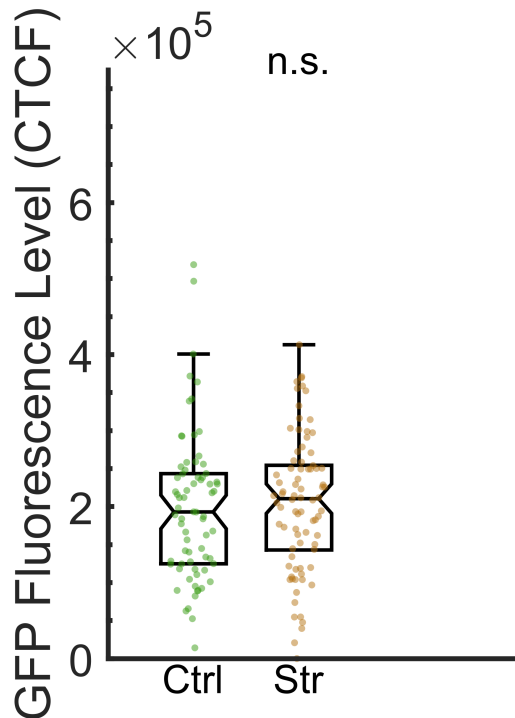

Supplement: supp [file elife-65797-supp-v1.zip › elife_poa_e65797_Figure_1_figure_supplement_2.pdf]

A.

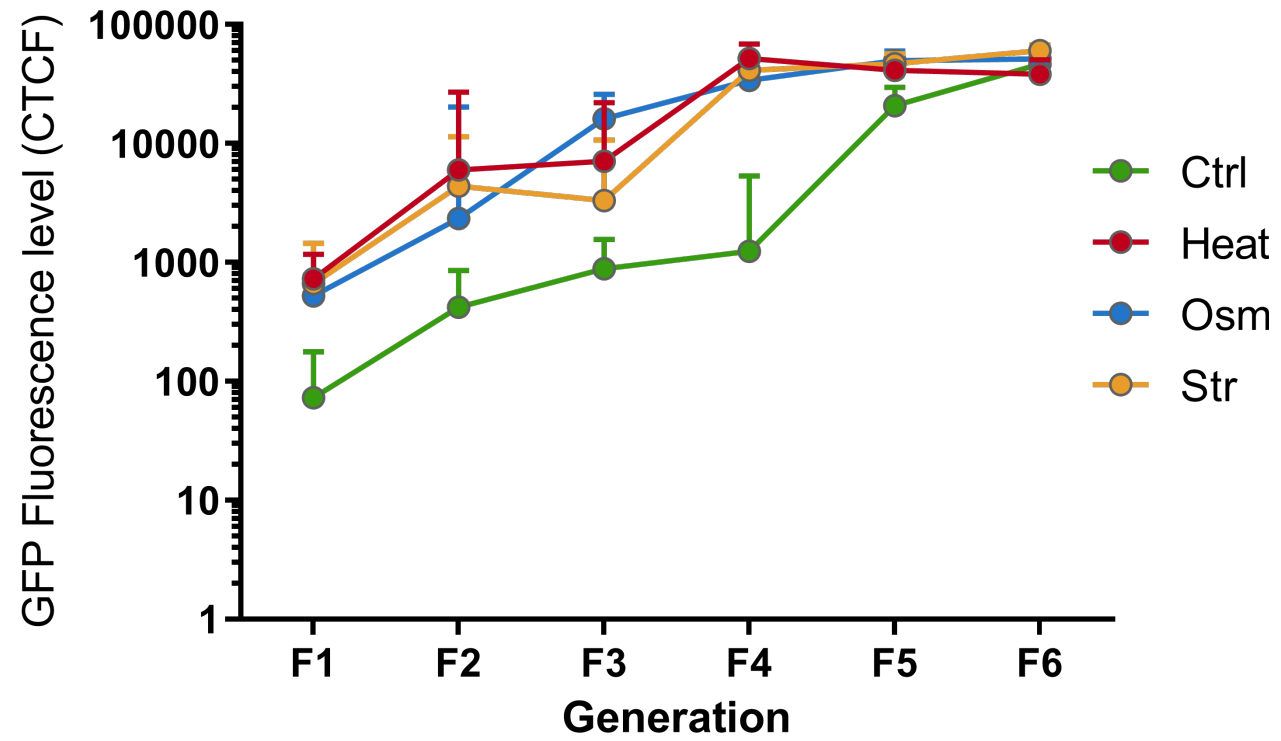

B.

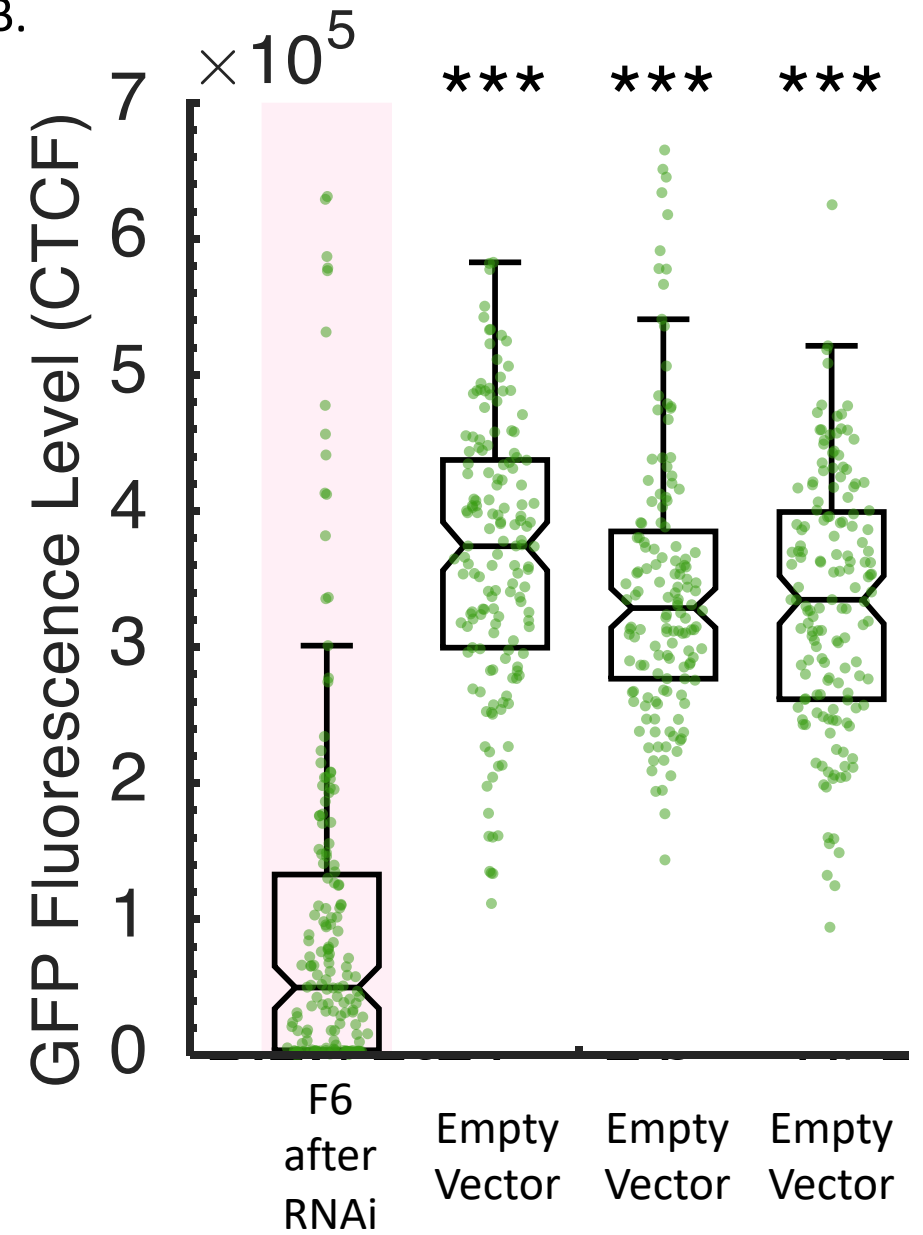

Supplement: supp [file elife-65797-supp-v1.zip › elife_poa_e65797_Figure_1_figure_supplement_3.pdf]

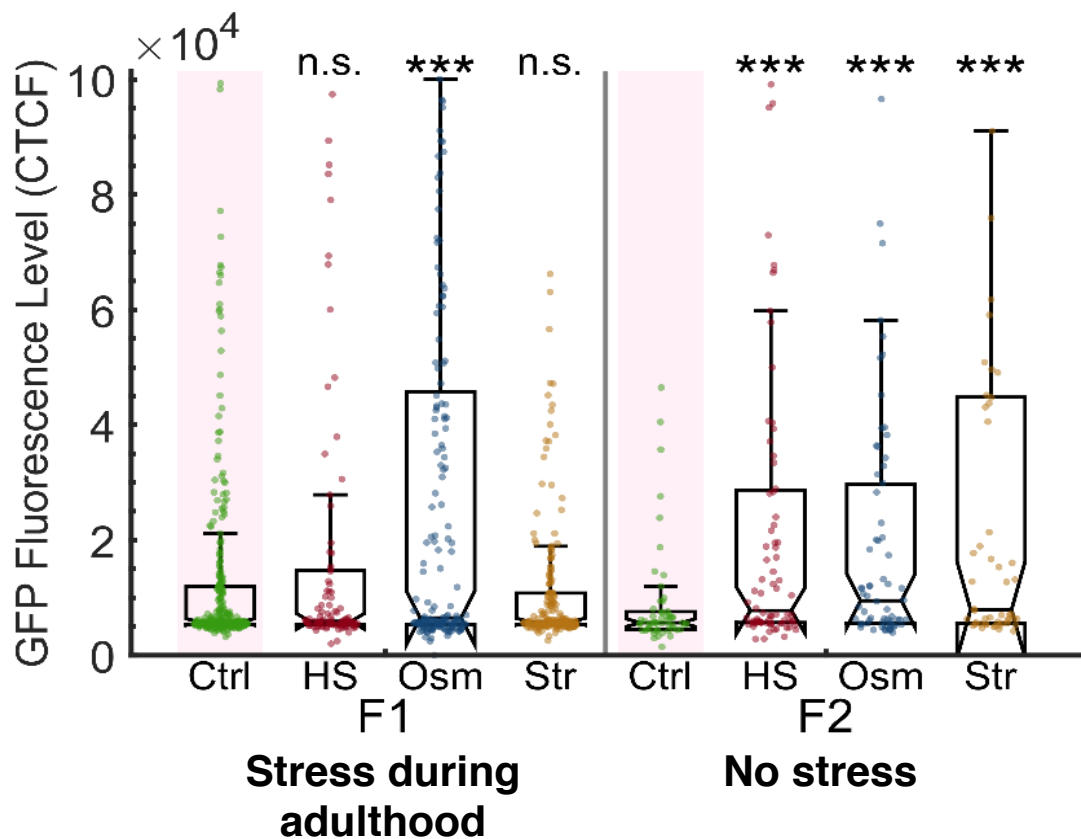

Supplement: supp [file elife-65797-supp-v1.zip › elife_poa_e65797_Figure_1_figure_supplement_4.pdf]

Initiation of a heritable  
silencing response

**P0**

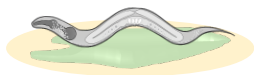

**F1**

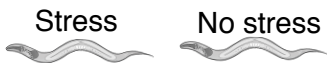

**F2**

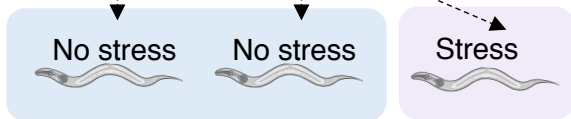

Stress at F1

Stress at F2

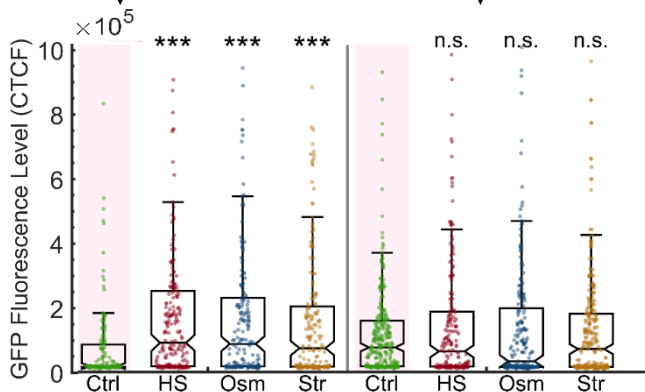

F2 generation

Supplement: supp [file elife-65797-supp-v1.zip › elife_poa_e65797_Figure_1_figure_supplement_5.pdf]

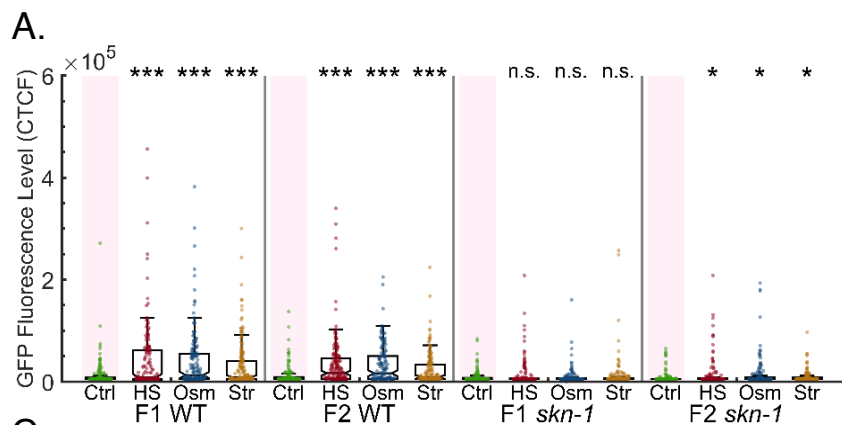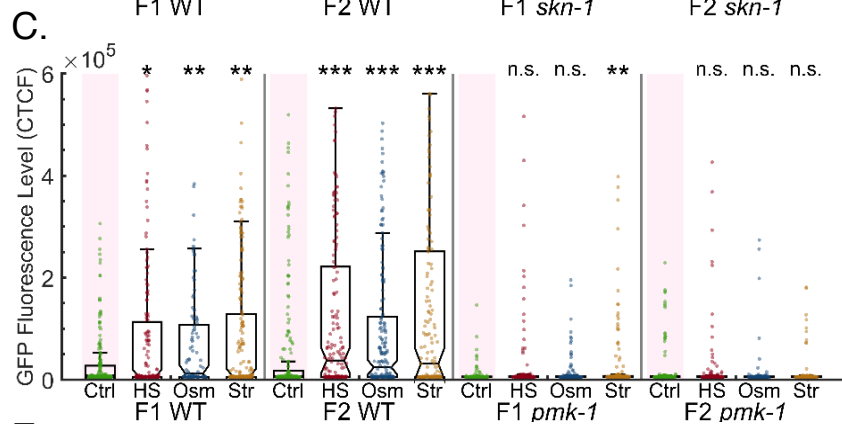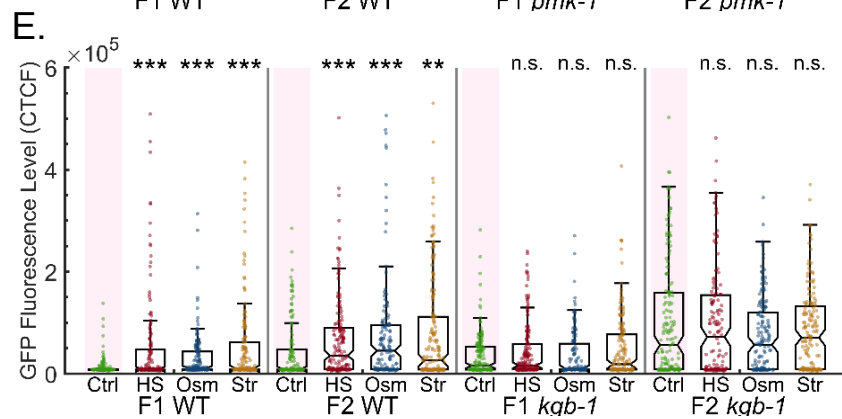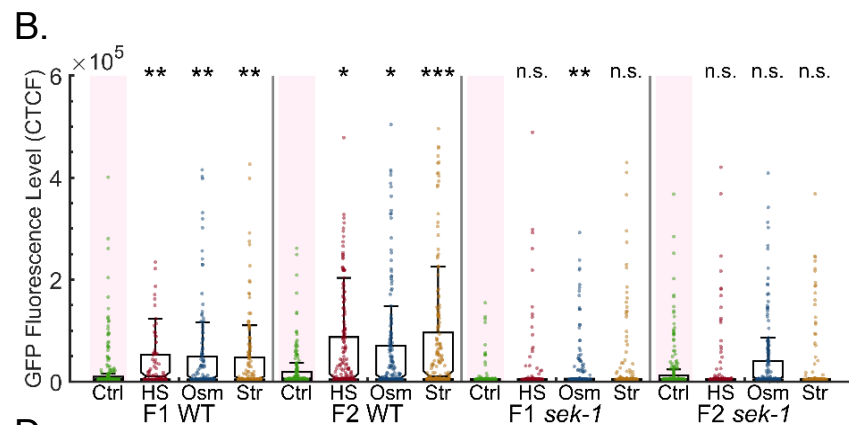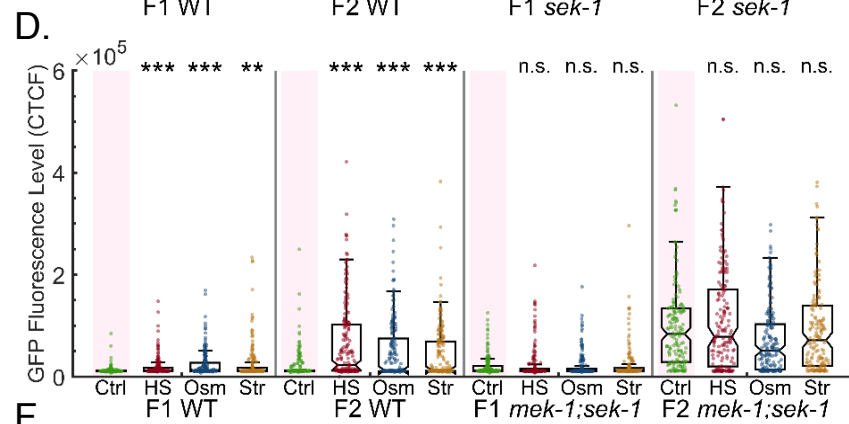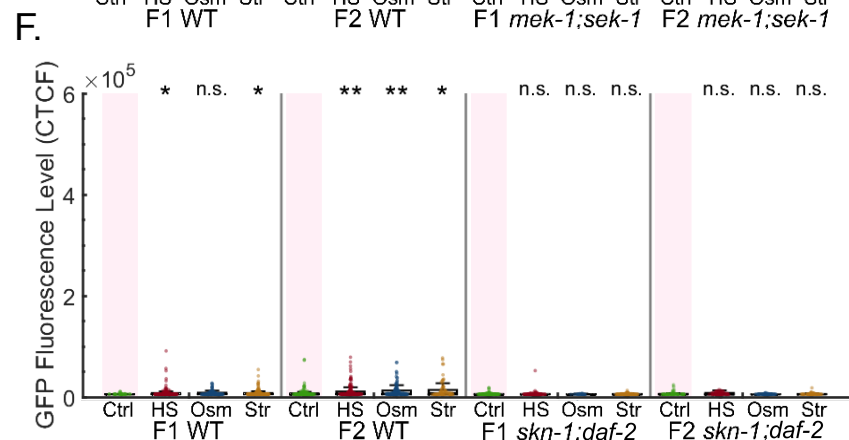

Supplement: supp [file elife-65797-supp-v1.zip › elife_poa_e65797_Figure_5_figure_supplement_1.pdf]

A.

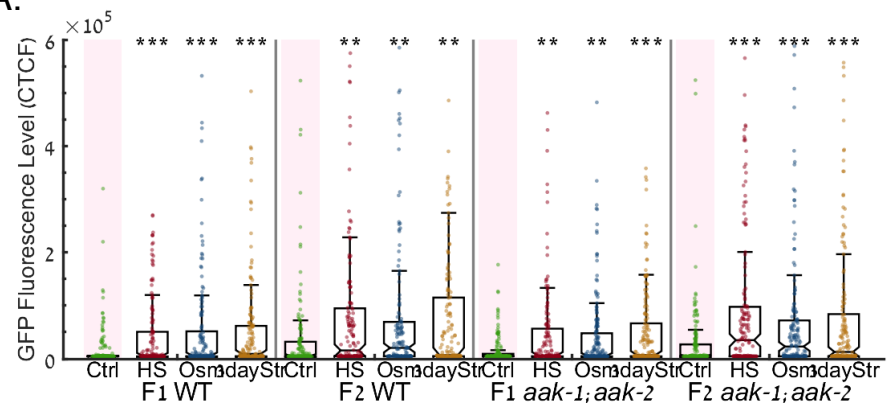

B.

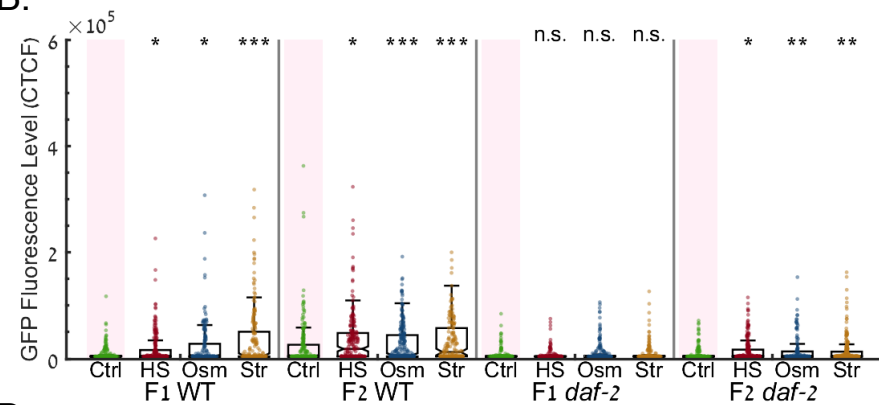

C.

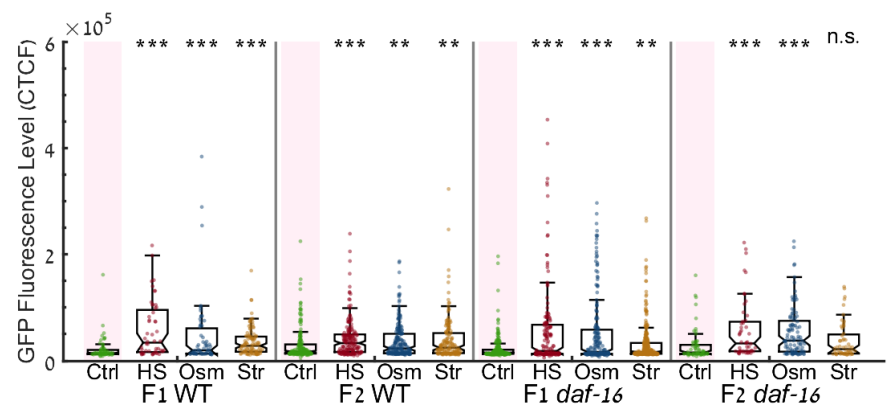

D.

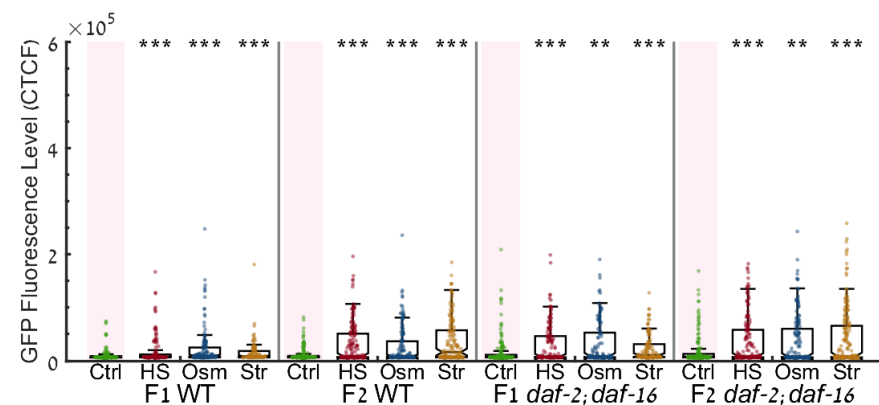

E.

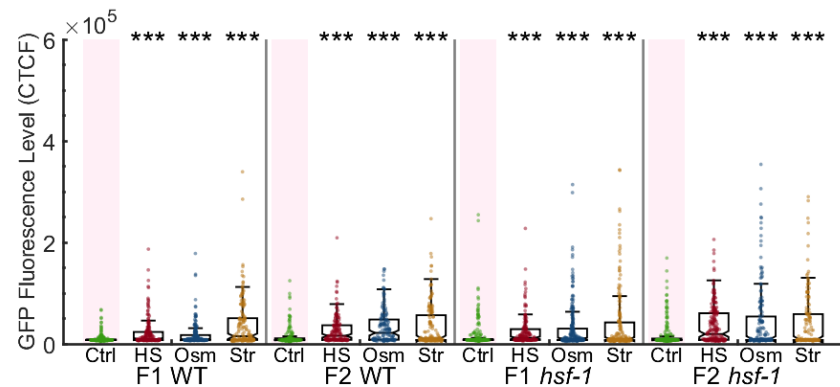

Supplement: supp [file elife-65797-supp-v1.zip › elife_poa_e65797_Figure_5_figure_supplement_2.pdf]

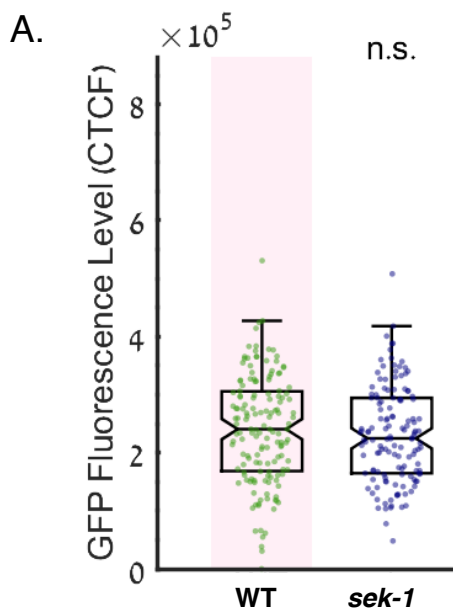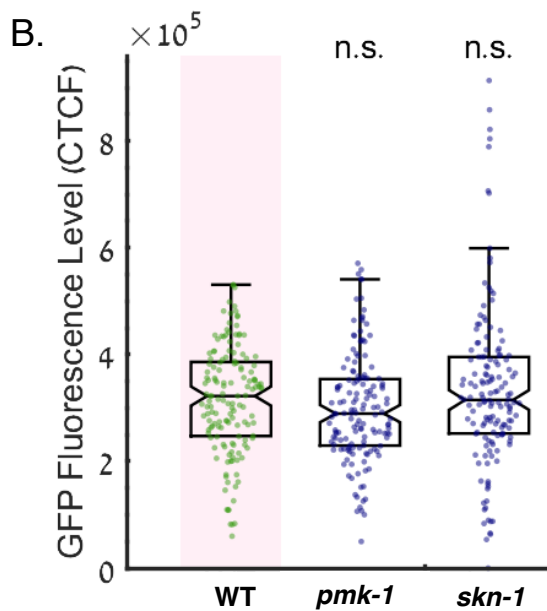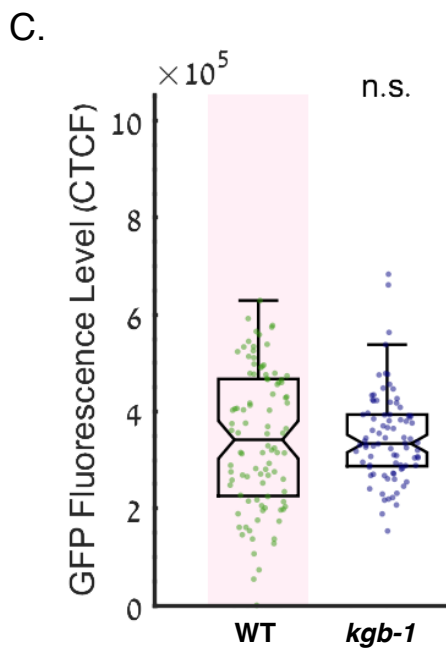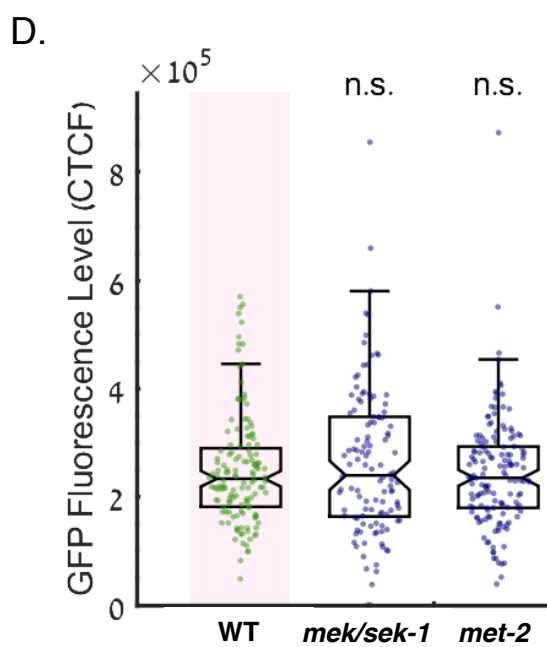

Supplement: supp [file elife-65797-supp-v1.zip › elife_poa_e65797_Figure_5_figure_supplement_3.pdf]

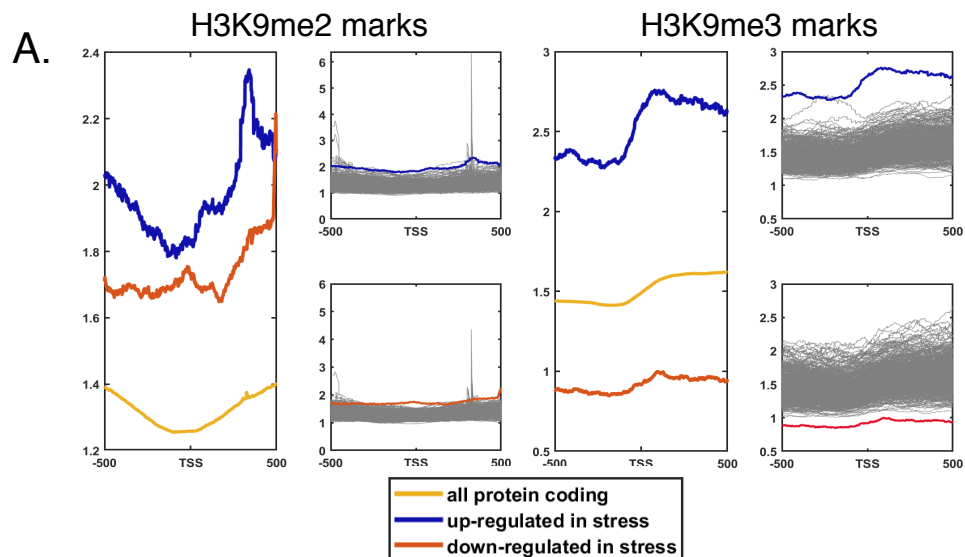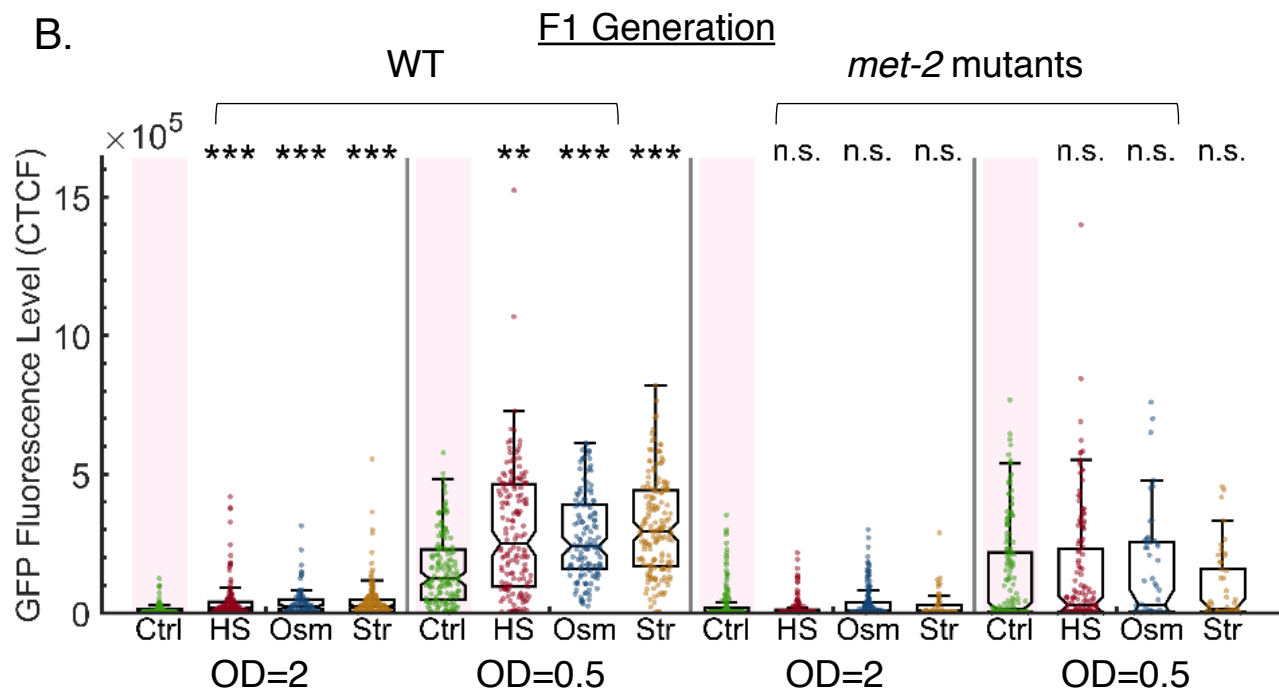

Supplement: supp [file elife-65797-supp-v1.zip › elife_poa_e65797_Figure_6_figure_supplement_1.pdf]
